# Supplementary material for: The creation and selection of mutations resistant to a gene drive over multiple generations in the malaria mosquito
Source: PLoS Genet. 2017 Oct 4;13(10):e1007039. doi: 10.1371/journal.pgen.1007039 (PMC5648257; doi:10.1371/journal.pgen.1007039)
Supplement: S1 Table — (XLSX) [file pgen.1007039.s002.xlsx]

## Sheet: CT1 g2
label	abundance	maxid	freq
Ref	81922	100	0.625144
207+A	4098	99.7	0.0312717
203-GAG	4055	99.1	0.0309436
203-GAGGAG	4017	98.2	0.0306536
200-AGTGAGG	2510	97.9	0.0191537
197-GAAAGTGAG	2369	97.3	0.0180778
202-TGAGGA	1896	98.2	0.0144683
199-AAGTGAGG	1881	97.6	0.0143538
207-A	1655	99.7	0.0126292
198-AAAGTGAGGA	1539	97	0.0117441
204-AGGA	1252	98.8	0.00955397
206-GA	1217	99.4	0.00928689
196-AGAAAGTGAGG	1187	96.7	0.00905796
203-GAGGA	1169	98.5	0.0089206
197-GAAAGTGAGG	905	97	0.00690602
189-GTGAGGAAGAAA	836	96.4	0.00637949
201-GTGAG	741	98.5	0.00565455
201-GTGAGG	724	98.2	0.00552482
206-GAGGA	579	98.5	0.00441833
203-GAGG	512	98.8	0.00390705
194-GAAGAAAGTGAGGA	485	95.8	0.00370102
195-AAGAAAGTGAGGA	465	96.1	0.0035484
193-GGAAGAAAGTGAG	462	96.1	0.00352551
205-G	429	99.7	0.00327368
205-GG	409	99.4	0.00312107
20-CTG_33+AGGATCGCCCCGCGAAAATGCATGGGGAACAGGGCAAAAATGCCCGCCAT_51+ATTCAG_66+C_110+ATGCA_153+C_213+CCA_263-ACTAC_322+CGGCCCCCGGCTCATCA	377	42.7	0.00287687
323-G	364	99.7	0.00277767
190-TGAGGAAGAAAGTGA	294	94.6	0.0022435
186-GAGGTGAGGAAGAAAGTGAG	284	94	0.00216719
188-GGTGAG_208+T	279	96.7	0.00212904
208-G	220	99.7	0.00167881
324-T	217	99.7	0.00165592
189-GTGAGGAAGAAAGTGAGGA	215	94.3	0.00164066
193-GGAAGAAAGTGAGG	186	95.8	0.00141936
191-GAGGAAGAAAGTGAG	179	95.5	0.00136594
10-A	168	99.7	0.001282
183-AGCGAGGTGAGGAAGAAAGTGAGGA	167	92.5	0.00127437
208-GG	165	99.4	0.00125911
166-GCTACGATCGATGTCGCAGCGAGGTGAGGAAGAAAGTGAGGA	115	86.7	0.000877561
192-AGGAAGAAAGTGAGGA	113	95.2	0.000862299
327-A	107	99.7	0.000816513
188-GGTGAGGAAGAAAGTGAG	105	93.7	0.000801251
148-CTGTGGGATGGATCAGATGCTACGATCGATGTCGCAGCGAGGTGAGGAAGAAAGTGAGGA	103	81.9	0.00078599
201-GTGAGGAG	102	97.6	0.000778359
191-GAGGAAGAAAGTGAGGA	100	94.9	0.000763097
200-AGTGAGGAGG	97	97	0.000740204
34+G_48+G_104-TGT_134-GA_161+TTCGG_174+TTTGTTTTGC	96	48	0.000732573
186-GAGGTGAGGAAGAAAGT	94	94.9	0.000717311
200-AGTG	88	98.8	0.000671525
202-TGA	86	99.1	0.000656263
208-GGAGG	85	98.5	0.000648632
208-GGAGGG	84	98.2	0.000641001
164-ATGCTACGATCGATGTCGCAGCGAGGTGAGGAAGAAAGTGAGGA	84	86.7	0.000641001
183-AGCGAGGTGAGGAAGAAAGTGAGG	83	92.8	0.00063337
208+AGAAAG	81	98.2	0.000618108
188-GGTGAGGAAGAAAGTGAGGAGGAG	79	92.5	0.000602846
157-GGATCAGATGCTACGATCGATGTCGCAGCGAGGTGAGGAAGAAAGTGAGGA	79	84.6	0.000602846
186-GAGGTGAGGAAGAAAGTGAGGAG	70	92.2	0.000534168
141-AGTCGGGCTGTGGGATGGATCAGATGCTACGATCGATGTCGCAGCGAGGTGAGGAAGAAAGTGAGGA	66	79.8	0.000503644
329-G	66	99.7	0.000503644
199-AAGTGAGGAGG	66	96.7	0.000503644
207-AGGA	65	98.2	0.000496013
325-A	64	99.7	0.000488382
200-AGTGAGGAG	63	96.4	0.000480751
203-GAGGAGGA	60	97.6	0.000457858
200-AGTGAG	57	97.9	0.000434965
190-TGAGGAAGAAAGTGAGGA	57	94.6	0.000434965
75-GAGGGATCTGTCTACCACCGGGCAAGAAGTGTAACGGATACGTTAACTGTCTTGGTGGTGAGGATGAGTCGGGCTGTGGGATGGATCAGATGCTACGATCGATGTCGCAGCGAGGTGAGGAAGAAAGT	56	60.5	0.000427334
206+GT	55	99.4	0.000419703
46-CTGT_65-ATCTGGGG_123-GTC	54	46.4	0.000412072
322-T	54	99.7	0.000412072
208+G	53	99.7	0.000404441
152-GGGATGGATCAGATGCTACGATCGATGTCGCAGCGAGGTGAGGAAGAAAGTGAGGA	52	83.1	0.00039681
205-GGAGGAG	52	97.9	0.00039681
194-GAAGAAAGTGAGGAGGAGGGT	50	93.1	0.000381548
208-GGAGGGTG	50	97.6	0.000381548
191-GAGGAAGAAAGTGAGGAG	49	94.6	0.000373917
206+GA	49	99.1	0.000373917
204-AGGAGGA	48	97.9	0.000366286
125-CTTGGTGGTGAGGATGAGTCGGGCTGTGGGATGGATCAGATGCTACGATCGATGTCGCAGCGAGGTGAGGAAGAAAGTGAGGA	46	74.1	0.000351024
61-ATGTATCTGGGGTGGAGGGATCTGTCTACCACCGGGCAAGAAGTGTAACGGATACGTTAACTGTCTTGGTGGTGAGGATGAGTCGGGCTGTGGGATGGATCAGATGCTACGATCGATGTCGCAGCGAGGTGAGGAAGAAAGTGAGGA	46	55.7	0.000351024
171-GATCGATGTCGCAGCGAGGTGAGGAAGAAAGTGAG	46	89.5	0.000351024
240+GGATT_257-G_314+TCGATACGACT	45	45	0.000343393
205-GGAG	44	98.2	0.000335763
202-TGAGGAGGA	44	97	0.000335763
186-GAGGTGAGGAAGAAAGTGAGGA	42	93.1	0.000320501
197-GAAAGTGAGGAG	42	96.4	0.000320501
116-GTTAACTGTCTTGGTGGTGAGGATGAGTCGGGCTGTGGGATGGATCAGATGCTACGATCGATGTCGCAGCGAGGTGAGGAAGAAAGTGAGGA	42	72.3	0.000320501
326-G	41	99.7	0.00031287
201-GTGAGGAGGAGG	40	95.5	0.000305239
114-ACGTTAACTGTCTTGGTGGTGAGGATGAGTCGGGCTGTGGGATGGATCAGATGCTACGATCGATGTCGCAGCGAGGTGAGGAAGAAAGTGAGGA	40	71.7	0.000305239
162-AGATGCTACGATCGATGTCGCAGCGAGGTGAGGAAGAAAGTGAGG	40	85.8	0.000305239
138-ATGAGTCGGGCTGTGGGATGGATCAGATGCTACGATCGATGTCGCAGCGAGGTGAGGAAGAAAGTGAGGA	39	78.9	0.000297608
191-GAGGAAGAAAGTGAGG	39	95.2	0.000297608
60-GATGTATCTGGGGTGGAGGGATCTGTCTACCACCGGGCAAGAAGTGTAACGGATACGTTAACTGTCTTGGTGGTGAGGATGAGTCGGGCTGTGGGATGGATCAGATGCTACGATCGATGTCGCAGCGAGGTGAGGAAGAAAGTGAG	39	56	0.000297608
176-ATGTCGCAGCGAGGTGAGGAAGAAAGTGAGGA	38	90.4	0.000289977
271-A	38	99.7	0.000289977
207+GAAA	37	98.5	0.000282346
207+AAAGTC	37	98.2	0.000282346
203-GAGGAGG	37	97.9	0.000282346
198-AAAGTGAGGAGGAGGGTGGTAGTGCCACACAGAGAGCTTCGGATGTGGATACAACGGAAGCTGAGACTAC	36	78.3	0.000274715
131-GGTGAGGATGAGTCGGGCTGTGGGATGGATCAGATGCTACGATCGATGTCGCAGCGAGGTGAGGAAGAAAGTGAGGA	36	76.8	0.000274715
208-GGAG	36	97.6	0.000274715
21-TGCCAGCACGTA_73-TGGAGGGATCTGT	35	49.1	0.000267084
203-GAG_323-G	35	98.8	0.000267084
207+AA	34	98.5	0.000259453
195-AAGAAAGTGAGGAGGA	34	95.2	0.000259453
167-CTACGATCGATGTCGCAGCGAGGTGAGGAAGAAAGTGAGGAGGA	33	85.8	0.000251822
205+G	33	98.8	0.000251822
145-GGGCTGTGGGATGGATCAGATGCTACGATCGATGTCGCAGCGAGGTGAGGAAGAAAGTGAGGA	32	81	0.000244191
74-GGAGGGATCTGTCTACCACCGGGCAAGAAGTGTAACGGATACGTTAACTGTCTTGGTGGTGAGGATGAGTCGGGCTGTGGGATGGATCAGATGCTACGATCGATGTCGCAGCGAGGTGAGGAAGAAAGTGAGGA	32	59.6	0.000244191
79-GATCTGTCTACCACCGGGCAAGAAGTGTAACGGATACGTTAACTGTCTTGGTGGTGAGGATGAGTCGGGCTGTGGGATGGATCAGATGCTACGATCGATGTCGCAGCGAGGTGAGGAAGAAAGTGAGGA	32	60.5	0.000244191
180-CGCAGCGAGGTGAGGAAGAAAGTGAGG	32	91.9	0.000244191
321-G	32	99.7	0.000244191
208-GGAGGGT	31	97.6	0.00023656
100-GAAGTGTAACGGATACGTTAACTGTCTTGGTGGTGAGGATGAGTCGGGCTGTGGGATGGATCAGATGCTACGATCGATGTCGCAGCGAGGTGAGGAAGAAAGTGAG	31	67.5	0.00023656
189-GTGAGGAAGAAAGTGA	30	93.7	0.000228929
85-TCTACCACCGGGCAAGAAGTGTAACGGATACGTTAACTGTCTTGGTGGTGAGGATGAGTCGGGCTGTGGGATGGATCAGATGCTACGATCGATGTCGCAGCGAGGTGAGGAAGAAAGTGAGGA	30	62.7	0.000228929
140-GAGTCGGGCTGTGGGATGGATCAGATGCTACGATCGATGTCGCAGCGAGGTGAGGAAGAAAGTGAGG	30	78.6	0.000228929
162-AGATGCTACGATCGATGTCGCAGCGAGGTGAGGA	30	87.3	0.000228929
88-ACCACCGGGCAAGAAGTGTAACGGATACGTTAACTGTCTTGGTGGTGAGGATGAGTCGGGCTGTGGGATGGATCAGATGCTACGATCGATGTCGCAGCGAGGTGAGGAAGAAAGTGAGGAG	30	62.7	0.000228929
129-GTGGTGAGGATGAGTCGGGCTGTGGGATGGATCAGATGCTACGATCGATGTCGCAGCGAGGTGAGGAAGAAAGTGAGGA	30	75.6	0.000228929
205+AAG	30	97.9	0.000228929
178-GTCGCAGCGAGGTGAGGAAGAAAGTGAGGA	30	89.8	0.000228929
203-GAGGAGGAGG	29	97	0.000221298
195-AAGAAAGTGAGGAGGAGGGTGGTA	29	91.3	0.000221298
185-CGAGGTGAGGAAGAAAGTGAGGA	29	93.1	0.000221298
132-GTGAGGATGAGTCGGGCTGTGGGATGGATCAGATGCTACGATCGATGTCGCAGCGAGGTGAGGAAGAAA	29	78.3	0.000221298
169-ACGATCGATGTCGCAGCGAGGTGAGGAAGAAAGTGAGG	29	88.6	0.000221298
193-GGAAGAAAGTGAGGAG	29	95.2	0.000221298
206+CCACTGCCAGTACGT	28	84.8	0.000213667
155-ATGGATCAGATGCTACGATCGATGTCGCAGCGAGGTGAGGAAGAAAGTGAGGA	28	82.8	0.000213667
207+GT	28	99.1	0.000213667
200-AGTGAGGAGGAGGG	28	95.5	0.000213667
103-GTGTAACGGATACGTTAACTGTCTTGGTGGTGAGGATGAGTCGGGCTGTGGGATGGATCAGATGCTACGATCGATGTCGCAGCGAGGTGAGGAAGAAAGTGAGG	28	67.8	0.000213667
13-T	28	99.7	0.000213667
166-GCTACGATCGATGTCGCAGCGAGGTGAGGAAGAAA	27	88.6	0.000206036
164-ATGCTACGATCGATGTCGCAGCGAGGTGAGGAAGAAAGTGAGGAGGA	27	84.6	0.000206036
105-GTAACGGATACGTTAACTGTCTTGGTGGTGAGGATGAGTCGGGCTGTGGGATGGATCAGATGCTACGATCGATGTCGCAGCGAGGTGAGGAAGAAAGTGAGG	26	68.1	0.000198405
152-GGGATGGATCAGATGCTACGATCGATGTCGCAGCGAGGTGAGGAAGAAAGTGAGGAGGA	26	81.6	0.000198405
163-GATGCTACGATCGATGTCGCAGCGAGGTGAGGAAGAAAGTGAG	26	85.8	0.000198405
205+AGTG	26	97	0.000198405
189-GTGAGGAAGAAAGTGAGGAGGA	26	92.2	0.000198405
159-ATCAGATGCTACGATCGATGTCGCAGCGAGGTGAGGAAGAAAGTGAGGA	25	85.2	0.000190774
207+GTA	25	97.6	0.000190774
166-GCTACGATCGATGTCGCAGCGAGGTGAGGAAGAAAGTGA	25	86.7	0.000190774
174-CGATGTCGCAGCGAGGTGAGGAAGAAAGTGA	25	89.2	0.000190774
7-G	25	99.7	0.000190774
200+AGTGAAAGTATCAACTTGAAAAAGTGGCACCGAGTCGGTGCttttttttACGCGTGGGTCCCATGGGTGAGGTGGAGTACGCGCCCGGGGAGCCCAAAGGTTACCCCAGTTGGGGGGCGCGCCCAACTTTGTATAGAAAAGTTGGGTG	24	68.3	0.000183143
188-GGTGAGGAAGAAAGTGAGG	24	94.3	0.000183143
206+A	24	99.1	0.000183143
181-GCAGCGAGGTGAGGAAGAAAGTGAGGAGGAG	23	90.7	0.000175512
99-AGAAGTGTAACGGATACGTTAACTGTCTTGGTGGTGAGGATGAGTCGGGCTGTGGGATGGATCAGATGCTACGATCGATGTCGCAGCGAGGTGAGGAAGAAAGTGAGG	23	66.9	0.000175512
197-GAAAGTGAGGAGGAGGGT	23	93.7	0.000175512
147-GCTGTGGGATGGATCAGATGCTACGATCGATGTCGCAGCGAGGTGAGGAAGAAAGTGAGGA	23	80.7	0.000175512
209-GA	23	99.1	0.000175512
320-A	23	99.7	0.000175512
207+A_323-G	23	98.5	0.000175512
93-CGGGCAAGAAGTGTAACGGATACGTTAACTGTCTTGGTGGTGAGGATGAGTCGGGCTGTGGGATGGATCAGATGCTACGATCGATGTCGCAGCGAGGTGAGGAAGAAAGTGAGGA	22	64.8	0.000167881
195-AA	22	82.1	0.000167881
150-GTGGGATGGATCAGATGCTACGATCGATGTCGCAGCGAGGTGAGGAAGAAAGTGAGGA	22	81.6	0.000167881
207+AAGAA	22	97.6	0.000167881
203-GAG_324-T	22	98.8	0.000167881
157-GGATCAGATGCTACGATCGATGTCGCAGCGAGGTGAGGAAGAAAGTGA	21	84.6	0.00016025
203+CGAGGCGAGGAGGGTGTCGCAACGA	21	91	0.00016025
149-TGTGGGATGGATCAGATGCTACGATCGATGTCGCAGCGAGGTGAGGAAGAAAGTGAGGA	21	81.6	0.00016025
206+GACGTAT	21	97.1	0.00016025
69-G	21	99.7	0.00016025
9-T	21	99.7	0.00016025
162-AGATGCTACGATCGATGTCGCAGCGAGGTGAGGAAGAAAGTGAGGA	20	86.1	0.000152619
186-GAGGTGAGGAAGAAAGTGAGGAGG	20	92.8	0.000152619
201-GTGAGGAGGAG	20	95.8	0.000152619
206+GAGGC	20	97.3	0.000152619
207+GTGGTA	20	96.4	0.000152619
188-GGTGAGGAAGAAAGTGAGGAGG	20	93.4	0.000152619
192-AGGAAGAAAGTGA	20	95.5	0.000152619
150-GTGGGATGGATCAGATGCTACGATCGATGTCGCAGCGAGGTGAGGAAGAAAGTGAGG	20	81.9	0.000152619
200+AGTG	20	98.8	0.000152619
201-GTGAGGAGGAGGGTGGTAGTG	20	86.4	0.000152619
207+GTGAAAGTGAA	20	95.6	0.000152619
207+AGTTGAAAGaaaaaaa	20	94.3	0.000152619
191-GAGGAAGAAAGTGAGGAGG	20	94.3	0.000152619
200+ACAACTTAACGCGTGGGTCCCATGGGTGAGGTGGAGTACGCGCCCGGGGAGCCCAAAGGTTACCCCAGTTGGGGGGCGCGCCCAACTTTGTATAGAAAAGTTGGGTG	19	74.5	0.000144988
86-CTACCACCGGGCAAGAAGTGTAACGGATACGTTAACTGTCTTGGTGGTGAGGATGAGTCGGGCTGTGGGATGGATCAGATGCTACGATCGATGTCGCAGCGAGGTGAGGAAGAAAGTGAGGA	19	62.7	0.000144988
137-GATGAGTCGGGCTGTGGGATGGATCAGATGCTACGATCGATGTCGCAGCGAGGTGAGGAAGAAAGTGAGGAGGA	19	77.7	0.000144988
186-GAGGTGAGGAAGAAAGTGAGG	19	92.8	0.000144988
175-GATGTCGCAGCGAGGTGAGGAAGAAAGTGAG	19	89.8	0.000144988
208+GGCCATT	19	96.8	0.000144988
150-GTGGGATGGATCAGATGCTACGATCGATGTCGCAGCGAGGTGAGGAAGAAAGTGAGGAG	19	81.6	0.000144988
193-GGAAGAAAGTGAGGAGG	19	93.7	0.000144988
52-G	19	99.7	0.000144988
181-GCAGCGAGGTGAGGAAGAAAGTGAG	19	91.6	0.000144988
175-GATGTCGCAGCGAGGTGAG_203-GAG	18	92.2	0.000137357
208+AG	18	99.4	0.000137357
200+AGTGAGGAGCGTATAGAAAAAGTATATTGTATAGAAAAGTTGGGTG	18	86.8	0.000137357
34+G_48+G_104-TGT_130+CACTTGTTGCTCCTT_152+A_171-GAT	18	46.8	0.000137357
197-GAAAGT	18	97.9	0.000137357
205+AG	18	98.8	0.000137357
174-CGATGTCGCAGCGAGGTGAGGAAGAAAGTGAGG	18	90.1	0.000137357
206+TGCGAGGT	18	97.4	0.000137357
200+AGTGAGGAGTG	18	96.8	0.000137357
112-ATACGTTAACTGTCTTGGTGGTGAGGATGAGTCGGGCTGTGGGATGGATCAGATGCTACGATCGATGTCGCAGCGAGGTGAGGAAGAAAGTGAGGA	18	71.1	0.000137357
200+AGTGAGGACTTTGTGTAGAACTTTGTATAGAAAAGTTGGGTG	17	87.7	0.000129726
29+TAGC_81-TCTGTCT_125-CTTGGTGGTGAGGATGA_153-GGAT_224-ACACA_245+ATA_270+GCGGAACGGCACAC_311-GAAGAA	17	43.3	0.000129726
208+TGGTAG	17	98.2	0.000129726
175-GAT	17	82.1	0.000129726
206+GGT	17	99.1	0.000129726
123-GTCTTGGTGGTGAGGATGAGTCGGGCTGTGGGATGGATCAGATGCTACGATCGATGTCGCAGCGAGGTGAGGAAGAAAGTGAGGA	17	73.2	0.000129726
196-AGAAAGTGAGGAG	17	96.1	0.000129726
193-GGAAGAAAGTGAGGAGGAG	17	93.4	0.000129726
101-AAGTGTAACGGATACGTTAACTGTCTTGGTGGTGAGGATGAGTCGGGCTGTGGGATGGATCAGATGCTACGATCGATGTCGCAGCGAGGTGAGGAAGAAAGTGAGGA	17	67.2	0.000129726
183-AGCGAGGTGAGGAAGAA	17	93.4	0.000129726
206-GAGGAGGGTGGTAGTGCCACACAGAGAGCTTCGGATGTGGATACAACGGAAGCTGAGACTACC	17	80.7	0.000129726
205+T	17	98.8	0.000129726
200+AGTGGAAGAAAGGTTACCCCAGTTGGGGGGCGCGCCCAACTTTGTATAGAAAAGTTGGGTG	17	83.2	0.000129726
205-GGAGGAGGGT	17	96.4	0.000129726
20-CTG_78+A_114-AC_153+TACGTAATAGTTTTCGGTGTAT_174-CGA	16	44.3	0.000122095
204+GTAGT	16	97.6	0.000122095
206+AGTGGAAGCGAGGTGAGGAAAGT	16	92.4	0.000122095
207+AAGAAGTGTAACGGATACGTTA	16	93.8	0.000122095
95-GGCAAGAAGTGTAACGGATACGTTAACTGTCTTGGTGGTGAGGATGAGTCGGGCTGTGGGATGGATCAGATGCTACGATCGATGTCGCAGCGAGGTGAGGAAGAAAGTGAGGA	16	66	0.000122095
200+AGTGAGGAAGTGAGTGTATAGAAAAGTTGGGTG	16	89.6	0.000122095
206+GAGAAAGT	16	97.1	0.000122095
202-T	16	98.8	0.000122095
196-AGAAAGTGAG	16	97	0.000122095
211+AGT	16	97.6	0.000122095
203-GAGGA_323-G	16	98.2	0.000122095
14-G	16	99.7	0.000122095
173-TCGATGTCGCAGCGAGGTGAGGAAGAAAGTGAGG	16	89.2	0.000122095
201+CAACTTTATTATACAAAGTTGTGGCGCGCCCC	15	87.6	0.000114464
43+AT_125+GACA_134+CCTTTGCAC_171-GAT	15	44.6	0.000114464
206+CCACTGC	15	90	0.000114464
105-GTAACGGATACGTTAACTGTCTTGGTGGTGAGGATGAGTCGGGCTGTGGGATGGATCAGATGCTACGATCGATGTCGCAGCGAGGTGAGGAAGAAAGTGAGGA	15	68.4	0.000114464
207-AGGAGGGTGGTAGTGCCACACAGAGAGCTTCGGATGTGGATACA	15	86.1	0.000114464
140-GAGTCGGGCTGTGGGATGGATCAGATGCTACGATCGATGTCGCAGCGAGGTGAGGAAGAAAGTGAGGA	15	79.5	0.000114464
20-CTG_40+CCCCGCGAAAATGCAT_80-AT_97-C_143-T_167+TGGCCCGTCCT_185+GCTTGCGCGGCT_227+CCGC_252+AACATCAGGTCGCTCATGTCGG_322+CGGCCCCCGGCTCATCA	15	42.5	0.000114464
211-GGGTGGTAGTGCCACACAGAGAGCTTCGGATGTGGATACAAC	14	86.4	0.000106834
199+GTGGAAGAGCG_207+A	14	95.3	0.000106834
199-AAGTGAGGAG	14	95.8	0.000106834
208+CAGTCATACTCTCC	14	95.7	0.000106834
88-ACCACCGGGCAAGAAGTGTAACGGATACGTTAACTGTCTTGGTGGTGAGGATGAGTCGGGCTGTGGGATGGATCAGATGCTACGATCGATGTCGCAGCGAGGTGAGGAAGAAAGTGAGGA	14	63	0.000106834
206+GGGGGCTGGT	14	96.8	0.000106834
183-AGCGAGGTGAGGAAGAAAGTGAGGAGG	14	90.7	0.000106834
198-AAAGTGAGGAGGA	14	95.8	0.000106834
207+CCACAC	14	97.9	0.000106834
107-AACGGATACGTTAACTGTCTTGGTGGTGAGGATGAGTCGGGCTGTGGGATGGATCAGATGCTACGATCGATGTCGCAGCGAGGTGAGGAAGAAAGTGAGG	14	69.3	0.000106834
201+CAACTTTATTAT	14	85.8	0.000106834
207+AGGAGTGTATCCGAACCAC	14	94.3	0.000106834
207-A_323-G	14	99.4	0.000106834
19+A_51+GATTA_89-C_153+TACCCT_199+TTCATCCCCTCCTCT	13	40.2	9.92026e+09
200+AGTTGGGTG	13	83.5	9.92026e+09
206+CCACTGCCAGC	13	85.7	9.92026e+09
206+GAGGGTGGTAGTGCCACACAGAGAGCTTCGGATGTGGATACGACGGAAGCTGAGACTACGGCAGCGAGGTGAGGAAGAATGT	13	79.5	9.92026e+09
124-TCTTGGTGGTGAGGATGAGTCGGGCTGTGGGATGGATCAGATGCTACGATCGATGTCGCAGCGAGGTGAGGAAGAAAGTGAGGA	13	74.7	9.92026e+09
128-GGTGGTGAGGATGAGTCGGGCTGTGGGATGGATCAGATGCTACGATCGATGTCGCAGCGAGGTGAGGAAGAAAGTGAGGA	13	75	9.92026e+09
203-GAGGAGGAGGGTGGTAGTGCCACACA	13	91.3	9.92026e+09
197+GAAAGT	13	97	9.92026e+09
197+CT	13	87.9	9.92026e+09
199-AAGTGAGGAGGAGGGTGGTAGTGCCACACAGAGAGCTTCGGATGTGGATACAACGG	13	81.9	9.92026e+09
208+AAG	13	98.2	9.92026e+09
200+AGTGAGTGCttttttttACGCGTGGGTCCCATGGGTGAGGTGGAGTACGCGCCCGGGGAGCCCAAAGGTTACCCCAGTTGGGGGGCGCGCCCAACTTTGTATAGAAAAGTTGGGTG	13	73	9.92026e+09
140-GAGTCGGGCTGTGGGATGGATCAGATGCTACGATCGATGTCGCAGCGAGGTGAGGAAGAAAGTGAGGAGGA	13	77.7	9.92026e+09
198-AAAGTGAGGA_323-G	13	96.4	9.92026e+09
76-A	13	98.5	9.92026e+09
133-T	13	98.8	9.92026e+09
189-GTGAGGAAGAAA_323-G	13	96.1	9.92026e+09
209+TGGTAGT	12	97.1	9.15716e+09
76-AGGGATCTGTCTACCACCGGGCAAGAAGTGTAACGGATACGTTAACTGTCTTGGTGGTGAGGATGAGTCGGGCTGTGGGATGGATCAGATGCTACGATCGATGTCGCAGCGAGGTGAGGAAGAAAGTGAGGA	12	59	9.15716e+09
52-GGGGATGCGATGTATCTGGGGTGGAGGGATCTGTCTACCACCGGGCAAGAAGTGTAACGGATACGTTAACTGTCTTGGTGGTGAGGATGAGTCGGGCTGTGGGATGGATCAGATGCTACGATCGATGTCGCAGCGAGGTGAGGAAGAAAGTGAGGA	12	52.4	9.15716e+09
205+AGAAAG	12	96.7	9.15716e+09
21+G_68-TGGG_83-TGTCT_174+GA	12	48.9	9.15716e+09
63-GTATCTGGGGTGGAGGGATCTGTCTACCACCGGGCAAGAAGTGTAACGGATACGTTAACTGTCTTGGTGGTGAGGATGAGTCGGGCTGTGGGATGGATCAGATGCTACGATCGATGTCGCAGCGAGGTGAGGAAGAAAGTGAGGAG	12	54.8	9.15716e+09
65-ATCTGGGGTGGAGGGATCTGTCTACCACCGGGCAAGAAGTGTAACGGATACGTTAACTGTCTTGGTGGTGAGGATGAGTCGGGCTGTGGGATGGATCAGATGCTACGATCGATGTCGCAGCGAGGTGAGGAAGAAAGTGAGG	12	56	9.15716e+09
75-GAGGGATCTGTCTACCACCGGGCAAGAAGTGTAACGGATACGTTAACTGTCTTGGTGGTGAGGATGAGTCGGGCTGTGGGATGGATCAGATGCTACGATCGATGTCGCAGCGAGGTGAGGAAGAAAGTGAGGAGGA	12	57.8	9.15716e+09
200+AGTGAGGGAAGAAAGAACTTTGTATAGAAAAGTTGGGTG	12	88.1	9.15716e+09
174-CGATGTCGCAGCGAGGTGAGGAAGAAAGTGAG	12	89.2	9.15716e+09
207+AAAGTGAA	12	96.2	9.15716e+09
10-A_207+A	12	99.4	9.15716e+09
209+TAAGGGTGGTA	12	96.5	9.15716e+09
206+GAGTGGTAGT	12	95.9	9.15716e+09
153-GGATGGATCAGATGCTACGATCGATGTCGCAGCGAGGTGAGGAAGAAAGTGA	12	84.3	9.15716e+09
176-ATGTCGCAGCGAGGTGAGGAAGAA	12	89.8	9.15716e+09
207+A_324-T	12	98.5	9.15716e+09
206+GGTGGGT	12	96.2	9.15716e+09
324+T	12	98.8	9.15716e+09
321-GT	12	98.8	9.15716e+09
204+AGCGAAGAGAACGTCGTGTCCGA	11	91.8	8.39406e+09
144-CGGGCTGTGGGATGGATCAGATGCTACGATCGATGTCGCAGCGAGGTGAGGAAGAAAGTGAGGA	11	79.8	8.39406e+09
63-GTATCTGGGGTGGAGGGATCTGTCTACCACCGGGCAAGAAGTGTAACGGATACGTTAACTGTCTTGGTGGTGAGGATGAGTCGGGCTGTGGGATGGATCAGATGCTACGATCGATGTCGCAGCGAGGTGAGGAAGAAAGTGAGG	11	56.6	8.39406e+09
204-A	11	99.1	8.39406e+09
54-GGATGCGATGTATCTGGGGTGGAGGGATCTGTCTACCACCGGGCAAGAAGTGTAACGGATACGTTAACTGTCTTGGTGGTGAGGATGAGTCGGGCTGTGGGATGGATCAGATGCTACGATCGATGTCGCAGCGAGGTGAGGAAGAAAGTGAGGA	11	53.6	8.39406e+09
203+GAATCGATGTCGCAGAGGAAGTAGTAAAACAATAGTATTTCCC	11	87.5	8.39406e+09
200+AGTGATAGTGAGGAGGGTG	11	94.6	8.39406e+09
203-GAGGAG_323-G	11	97.9	8.39406e+09
19-ACTGCCA_53-GGGATGCGATGTATCTGGGGTGGAGGGA_152-GG_159-AT_177-TG_223-CACACAGAG_268+AGCAGCA_279+GGCTC_306+GC	11	44.2	8.39406e+09
201-GTGAGGAGG	11	97.3	8.39406e+09
77-G	11	99.7	8.39406e+09
204+A	11	99.4	8.39406e+09
208+GGGAGGGT	10	95.9	7.63097e+08
20-CT_34+G_48+G_104-TGT_134-GA_161+TTCGG_174+TTTGTTTTGC	10	48.5	7.63097e+08
87-TACCACCGGGCAAGAAGTGTAACGGATACGTTAACTGTCTTGGTGGTGAGGATGAGTCGGGCTGTGGGATGGATCAGATGCTACGATCGATGTCGCAGCGAGGTGAGGAAGAAAGTGAGGA	10	62.7	7.63097e+08
200+AGTGAACAAACTTGAAAGGCTTTGAAAGTGAAAGTGAACAACTTTGTATAGAAAAGTTGGGTG	10	83	7.63097e+08
20-CT_93+GTCTTCGCGTT	10	51.3	7.63097e+08
196+GTG	10	94.6	7.63097e+08
82-CTGTCTACCACCGGGCAAGAAGTGTAACGGATACGTTAACTGTCTTGGTGGTGAGGATGAGTCGGGCTGTGGGATGGATCAGATGCTACGATCGATGTCGCAGCGAGGTGAGGAAGAAAGTGAGGA	10	62	7.63097e+08
210+GTGGTA	10	96.4	7.63097e+08
192-AGGAAGAAAGTGAGGAGGAGGGTGGTAGTGCCACACAGAGAGCTTCGGATGTGGATACAACGGAAGCTGAGAC	10	73.8	7.63097e+08
208+C	10	99.1	7.63097e+08
119-AACTGTCTTGGTGGTGAGGATGAGTCGGGCTGTGGGATGGATCAGATGCTACGATCGATGTCGCAGCGAGGTGAGGAAGAAAGTGAGGA	10	73.2	7.63097e+08
202+TACAGGTGGTA	10	95	7.63097e+08
196-AGAAAGTGAGGAGGAGGGTGGT	10	93.4	7.63097e+08
203+GGA	10	97.3	7.63097e+08
207+AAGCGAGGTGAGGAAGAA	10	94	7.63097e+08
127-TGGTGGTGAGGATGAGTCGGGCTGTGGGATGGATCAGATGCTACGATCGATGTCGCAGCGAGGTGAGGAAGAAAGTGAGG	10	75	7.63097e+08
152-G	10	99.7	7.63097e+08
196-AGAAAGTGAGGAGG	10	94.9	7.63097e+08
200-AGTGAGG_323-G	10	97.6	7.63097e+08
197-GAAAGTGAG_323-G	10	97	7.63097e+08
206+GTGTGAAGAAAGTGAAAGT	9	93.7	6.86787e+09
67-CTGGGGTGGAGGGATCTGTCTACCACCGGGCAAGAAGTGTAACGGATACGTTAACTGTCTTGGTGGTGAGGATGAGTCGGGCTGTGGGATGGATCAGATGCTACGATCGATGTCGCAGCGAGGTGAGGAAGAAAGTGAGGAGGAGG	9	55.4	6.86787e+09
200+AGTGAGGATCCGAAGAAAGTGAGGATCGGGTG	9	90.9	6.86787e+09
207+TAGAAAGTGTCGTACGA	9	93.7	6.86787e+09
244-G	9	98.8	6.86787e+09
126-TTGGTGGTGAGGATGAGTCGGGCTGTGGGATGGATCAGATGCTACGATCGATGTCGCAGCGAGGTGAGGAAGAAAGTGAGG	9	75.6	6.86787e+09
20+C_57+ACAGGGCAAAAATGCCCGCCATCAGCGCGGCC_75+TAGACCTGGAACACGGTGAAT_110+ATGCA_153+C_213+CCA_263-ACTAC_322+CGGCCCCCGGCTCATCA	9	41.7	6.86787e+09
201+CAACTTTATTATACAAAGTTGTGGCGCGCCCCCCAACTGGGGTAACCTTT_223+ACTGCGTA	9	81.3	6.86787e+09
207+AAAGAA	9	98.2	6.86787e+09
145-GGGCTGTGGGATGGATCAGATGCTACGATCGATGTCGCAGCGAGGTGAGGAAGAAAGTGA	9	81	6.86787e+09
135-AGGATGAGTCGGGCTGTGGGATGGATCAGATGCTACGATCGATGTCGCAGCGAGGTGAGGAAGAAAGTGAGGA	9	78	6.86787e+09
200-AGTGAGGAGGAGGGTGGTAGTGCCACACAGAGAGCTTCGGATGTGGATACAACGGAAGCTGAG_286-AGAAACGACGACGTT	9	73.2	6.86787e+09
197+AGGGTGG	9	95.3	6.86787e+09
200-AGT	9	97.9	6.86787e+09
207+GA	9	99.1	6.86787e+09
204-AGGA_323-G	9	97.3	6.86787e+09
10-A_200-AGTGAGG	9	96.7	6.86787e+09
153-GGATGGATCAGATGCTACGATCGATGTCGCAGCGAGGTGAGGAAGAAAGTGAGGA	9	83.4	6.86787e+09
199-AAGTG	9	97	6.86787e+09
185+C_225+TTCATGGCCGGTG_296+T_322+GATTTTGTTTTGCTGT	8	43.2	6.10477e+09
234-CTTCGGAT_298+A_311-GA	8	48.4	6.10477e+09
50-CCGGGGATGCGATGTATCTGGGGTGGAGGGATCTGTCTACCACCGGGCAAGAAGTGTAACGGATACGTTAACTGTCTTGGTGGTGAGGATGAGTCGGGCTGTGGGATGGATCAGATGCTACGATCGATGTCGCAGCGAGGTGAGGAAGAAAGTGAGGA	8	52.4	6.10477e+09
34+G_48+G_125+GACA_134+CCTTTGCAC_174-CGA	8	46	6.10477e+09
200+ACAACTTTATTATACAAAGTTGTGGCGCGCCCCCCAACTGGGGTAACCTTTGGGCTCCCCGGGCGCGTACTCCACCTCACCCATGCGATCGCTCCGGAAAGATACATTGATGAGTTTGGACAAACCACAACGTGGGTG	8	70.2	6.10477e+09
200+AGTGAGTCGGTGCttttttttACGCGTGGGTCCCATGGGTGAGGTGGAGTACGCGCCCGGGGAGCCCAAAGGTTACCCCAGTTGGGGGGCGCGCCCAACTTTGTATAGAAAAGTTGGGTG	8	73.5	6.10477e+09
80-ATCTGTCTACCACCGGGCAAGAAGTGTAACGGATACGTTAACTGTCTTGGTGGTGAGGATGAGTCGGGCTGTGGGATGGATCAGATGCTACGATCGATGTCGCAGCGAGGTGAGGAAGAAAGTGAGGA	8	60.8	6.10477e+09
208+GGGTC	8	97.3	6.10477e+09
209+GTACCACCTACCACCGCGAGGT	8	93.5	6.10477e+09
200+AGTGGTGGTGGAGTGGAAGGTTACCCCAGTGGAAGGTTACCCCAGTTGGGGGGCGCGCCCAACTTTGTATAGAAAAGTTGGGTG	8	79.1	6.10477e+09
157-GGATCAGATGCTACGATCGATGTCGCAGCGAGGTGAGGAAGAAAGTGAGGAGGA	8	82.5	6.10477e+09
74-GGAGGGATCTGTCTACCACCGGGCAAGAAGTGTAACGGATACGTTAACTGTCTTGGTGGTGAGGATGAGTCGGGCTGTGGGATGGATCAGATGCTACGATCGATGTCGCAGCGAGGTGAGGAAGAAAGTGA	8	59.6	6.10477e+09
19+CCCAAAAGGATAGAA_136-GG_152-GGGATG_191-GA_213-GTGGTA_229-GAGAGCTTCGG_270-TA_311-GAAGAA	8	44.1	6.10477e+09
207+A_326-G	8	98.5	6.10477e+09
172-ATCGATGTCGCAGCGAGGTGAGGAAGAAAGTGAGGA	8	88.3	6.10477e+09
174-CGATGTCGCAGCGAGGTGAGGAAGAAAGTGAGGA	8	88.9	6.10477e+09
207-A_324-T	8	98.5	6.10477e+09
199-AAGTGAGGAGGAGGGTGGTAGTGCCACACAGAGAGCTTCGGATGTGGATACAACGGAAGCTGAGACTACCGTATTGTTCACATCGGAAG	8	73.2	6.10477e+09
210-A	8	99.7	6.10477e+09
194-GAAGAAAGTGA	8	96.4	6.10477e+09
207-A_322-T	8	98.2	6.10477e+09
211-G	8	99.7	6.10477e+09
206-GA_327-A	8	99.1	6.10477e+09
207-AGGAGGGT	8	97.3	6.10477e+09
204+AATGTTTGAAGAAAGTGAAAGTGAA	7	92.7	5.34168e+09
182-CAGCGAGGTGA_205-G	7	93.4	5.34168e+09
55-GATGCGATGTATCTGGGGTGGAGGGATCTGTCTACCACCGGGCAAGAAGTGTAACGGATACGTTAACTGTCTTGGTGGTGAGGATGAGTCGGGCTGTGGGATGGATCAGATGCTACGATCGATGTCGCAGCGAGGTGAGGAAGAAAGTGAGGA	7	53	5.34168e+09
200+AGTGAGGTCCCATGGGTGAGGTGGAGTACGCGCCCGGGGAGCCCAAAGGTTACCCCAGTTGGGGGGCGCGCCCAACTTTGTATAGAAAAGTTGGGTG	7	76.5	5.34168e+09
208-GGAGGGTGG	7	95.8	5.34168e+09
134-GAGGATGAGTCGGGCTGTGGGATGGATCAGATGCTACGATCGATGTCGCAGCGAGGTGAGGAAGAAAGTGAG	7	77.1	5.34168e+09
200+AGTGAGGATAAGAAAGTGAGTTGTATAGAAAAGTTGGGTG	7	89.2	5.34168e+09
209+TAGTGCCACACA	7	95.1	5.34168e+09
203-GAGGAG_327-A	7	97	5.34168e+09
203-GA	7	97.9	5.34168e+09
206-GAGGAGGGTGGTAGTGCCACACAGAGAGCTTCGGATGTGGATACAACGGAAGCTGAGACTACCGTATTGTTCACATCGGAAGAAACGACGACGTT	7	71.4	5.34168e+09
208+TCACTGT	7	97.1	5.34168e+09
200+AGTGAGGTTACCCCAGTTGGGGGGCGCGCCCAACTTTGTATAGAAAAGTTGGGTG	7	85.3	5.34168e+09
7+G	7	99.7	5.34168e+09
10-A_198-AAAGTGAGGA	7	96.7	5.34168e+09
10-A_203-GAGGAG	7	97.9	5.34168e+09
203-GAGG_323-G	7	97.9	5.34168e+09
203-GAG_327-A	7	98.8	5.34168e+09
73-T	7	98.8	5.34168e+09
157-G	7	98.8	5.34168e+09
10-A_197-GAAAGTGAG	7	97	5.34168e+09
323-GTA	7	99.1	5.34168e+09
203-GAGGAG_322-T	7	97.6	5.34168e+09
202-TGAGGA_323-G	7	97.6	5.34168e+09
319-G	7	97.9	5.34168e+09
207+AAAGGC	7	97.9	5.34168e+09
206-GAGGAGGGTGGTAGTGCCACACAGAGAGCTTCGGATGTGGATACA	6	85.8	4.57858e+09
203+GAG	6	97.9	4.57858e+09
20-CTGCCAGCACGTACTGCGCGGGC_102-AGTGTAACGGAT_122-TGTCTTGGTGGT_169-ACGATC_217+CGCC_268+GGAGATCG_279+GCGAT_292-G	6	43.8	4.57858e+09
20-CTG_40+CCCCGCGAAAATGCAT_80-AT_97-C_143-T_163+CC_172+TCCTTTTGA_185+GCTTGCGCGGCT_227+CCGC_252+AACATCAGGTCGCTCATGTCGG_322+CGGCCCCCGGCTCATCA	6	43	4.57858e+09
206+GAGGGTGGTGAGGAAGAAAGT	6	93.5	4.57858e+09
208+TACGTAAACTCTGTGT	6	95.4	4.57858e+09
206+GGTGGTA	6	97.6	4.57858e+09
20-CTG_33+AGGATCGCCCCGCGAAAATGCATGGGGAACAGGGCAAAAATGCCCGCCAT_51+ATTCAG_66+C_115+TCACC_153+C_213+CCA_263-ACTAC_322+CGGCCCCCGGCTCATCA	6	41.9	4.57858e+09
208+GGTACGGTCAAAGAGGTACGG	6	92.6	4.57858e+09
67-CTGGGGTGGAGGGATCTGTCTACCACCGGGCAAGAAGTGTAACGGATACGTTAACTGTCTTGGTGGTGAGGATGAGTCGGGCTGTGGGATGGATCAGATGCTACGATCGATGTCGCAGCGAGGTGAGGAAGAAAGTGAGGA	6	57.5	4.57858e+09
208+GT	6	98.5	4.57858e+09
166-GCTACGATCGATGTCGCAGCGAGGTGAGGAAGAAAGTGAG	6	86.7	4.57858e+09
207+TAGTGCCTACTC	6	94.5	4.57858e+09
20-CTG_33+AGGATCGCCCCGCGAAAATGCATGGGGAACAGGGCAAAAATGCCCGCCAT_51+ATTCAG_66+C_110+ATGCA_153+C_213+CCA_263-ACTAC_322+CGGCCCCAGGCTCATCA	6	41.9	4.57858e+09
208+GG	6	99.4	4.57858e+09
206+GAAAAT	6	98.2	4.57858e+09
84-GTCTACCACCGGGCAAGAAGTGTAACGGATACGTTAACTGTCTTGGTGGTGAGGATGAGTCGGGCTGTGGGATGGATCAGATGCTACGATCGATGTCGCAGCGAGGTGAGGAAGAAAGTGAGGAGGA	6	61.1	4.57858e+09
10-A_202-TGAGGA	6	97	4.57858e+09
10-A_203-GAG	6	97.9	4.57858e+09
10-A_206-GA	6	99.1	4.57858e+09
299-T	6	98.5	4.57858e+09
94-G	6	99.7	4.57858e+09
252-C	6	91.6	4.57858e+09
124-TCTTGGT_186-G_208-GGAGGGTGGTAGT_266-ACCG_299+GT_315+TT	5	44.9	3.81548e+08
52-G_203-GAGGAG	5	97.9	3.81548e+08
195-AAGAAAGTGAGGA_323-G	5	94.6	3.81548e+08
210+AAGAA	5	96.4	3.81548e+08
200-AGTGAGG_326-G	5	96.1	3.81548e+08
21+G_124-T_174+GA	5	47.4	3.81548e+08
206+GAGGT	5	97.6	3.81548e+08
77-GG_136-GG	5	48.1	3.81548e+08
56-ATGCGATGTATCTGGGGTGGAGGGATCTGTCTACCACCGGGCAAGAAGTGTAACGGATACGTTAACTGTCTTGGTGGTGAGGATGAGTCGGGCTGTGGGATGGATCAGATGCTACGATCGATGTCGCAGCGAGGTGAGGAAGAAAGTGAGGA	5	54.2	3.81548e+08
208+AGAAG	5	97	3.81548e+08
34+G_48+G_125+GGCA_134+CCTTTGTACGCAA_152+A_174-CGA	5	47.6	3.81548e+08
206+C	5	84	3.81548e+08
204-AGGA_327-A	5	97.3	3.81548e+08
324-TA	5	98.5	3.81548e+08
145-G	5	98.5	3.81548e+08
200-AGTGAGG_324-T	5	96.7	3.81548e+08
206+CCACTGCCAGCACGTACTGC	5	81.6	3.81548e+08
193-GGAAGAAAGTGAG_323-G	5	94.6	3.81548e+08
15-C	5	99.7	3.81548e+08
182-CAGCGAGGTGAGGAAGAAAGTGAGGAGGAGGGTGGTAGTGCCACA	5	86.4	3.81548e+08
196-AGAAAGTGAGG_323-G	5	96.4	3.81548e+08
206-GA_324-T	5	98.5	3.81548e+08
207+A_329-G	5	99.4	3.81548e+08
189-GTGAGGAAGAAA_324-T	5	96.1	3.81548e+08
18-CA_66+C_110+ATGCA_153+C_213+CCA_263-ACTAC_322+CGGCCCCCGGCTCATCA	5	43.7	3.81548e+08
10-A_199-AAGTGAGG	5	97.3	3.81548e+08
201-GTGAGG_324-T	5	97	3.81548e+08
199-AAGTGAGG_323-G	5	97	3.81548e+08
207+AAAGTA	5	98.2	3.81548e+08
107-A	5	98.8	3.81548e+08
321-GTG	5	99.1	3.81548e+08
80-A	5	99.4	3.81548e+08
211-GGG	5	99.1	3.81548e+08
209-GAGGGT	5	95.2	3.81548e+08
10-A_204-AGGA	4	97	3.05239e+09
10-A_50+C_193-GGAAGAAAGTGAGGAGGAG	4	92.2	3.05239e+09
202-TGAGGAGGAGGGTGGTAGTGCCACACAGAGAGCTTCGGATGTGGATACAACGGAAGC	4	81.6	3.05239e+09
206+GGTGAGAAGAAAGGCGAGGAAGAAAGT	4	91.1	3.05239e+09
20-CTG_33+AGGATCGCCCCGCGAAAATGCATGGGGAACAGGGCAAAAATGCCCGCCAT_51+ATTCAG_66+C_110+ATGCA_153+C_209+ACT_263-ACTAC_322+CGGCCCCCGGCTCATCA	4	41.4	3.05239e+09
142-GTCGGGCTGTGGGATGGATCAGATGCTACGATCGATGTCGCAGCGAGGTGAGGAAGAAAGTGAGGAGGAGGGTGGTAGTGCCACACAGAGAG_249-CAACGGAAGCTGAGACTACCGTAT	4	62.3	3.05239e+09
197+GTGGGAGCCCAAAGGTTACCCCAGTTGGGGGGCGCGCCCAACTTTGTATAGAAAAGTTGG	4	84.2	3.05239e+09
200-AGTG_324-T	4	98.5	3.05239e+09
205+CCCGGT	4	95.9	3.05239e+09
207+A_327-A	4	98.5	3.05239e+09
206+GAGT	4	97.6	3.05239e+09
205-GGAGGAGGGTGGTAGT	4	94.6	3.05239e+09
206+GGTGGT	4	96.4	3.05239e+09
144-CGGGCTGTGGGATGGATCAGATGCTACGATCGATGTCGCAGCGAGGTGAGGAAGAAAGTGAGGAGGAGGGTGGTAGTGCCACACAGAGAGCTTCGGATGTGGATACAA	4	67.5	3.05239e+09
202-TGAGGA_329-G	4	96.4	3.05239e+09
196-AGAAAGTGAGG_325-A	4	96.4	3.05239e+09
206+GAGGGTGGTAGTGCCACACAGAGAGCTTCGGATGTGGATACGACGGAAGCTGAGACTACGGCAACGAGGTGAGGAAGAATGT	4	79.5	3.05239e+09
20-CTG_33+AGGATCGCCCCGCGAAAATGCATGGGGAACAGGACAAAAATGCCCGCCAT_51+ATTCAG_66+C_110+ATGCA_153+C_213+CCA_263-ACTAC_322+CGGCCCCCGGCTCATCA	4	41.7	3.05239e+09
203-GAGGAGGAG	4	96.1	3.05239e+09
21+GCAT_27+CGTCACGTA_43+ACAGACCCGGGACCCGTCGATCACCTAAAACCCTTT_51+GTCCCACTTACGCG_111+ATC_137+A_162+AAG_216-GTAGTGC_279-CAT	4	42.8	3.05239e+09
197-GAAAGTGAG_321-G	4	97	3.05239e+09
204-AGGA_326-G	4	97.3	3.05239e+09
203-GAGG_327-A	4	97	3.05239e+09
151-TGGGATGGATCAGATGCTACGATCGATGTCGCAGCGAGGTGAGGAAGAAAGTGAGGAGGA	4	81	3.05239e+09
10-A_207-A	4	99.4	3.05239e+09
310-G	4	98.8	3.05239e+09
204-AGGA_329-G	4	98.5	3.05239e+09
197-GAAAGTGAG_325-A	4	97	3.05239e+09
206-GA_323-G	4	98.2	3.05239e+09
198-AAAGTGAGGA_324-T	4	96.7	3.05239e+09
200-AGTGAGG_327-A	4	97.3	3.05239e+09
23-C	4	98.8	3.05239e+09
237-C	4	98.5	3.05239e+09
7-GG	4	99.4	3.05239e+09
154-GATGGATCAGATGCTACGATCGATGTCGCAGCGAGGTGAGGAAGAAAGTGAGGA	4	83.7	3.05239e+09
10-A_183-AGCGAGGTGAGGAAGAAAGTGAGGA	4	92.2	3.05239e+09
283-G	4	95.8	3.05239e+09
50-C	4	99.7	3.05239e+09
161-CAGATGCTACGATCGATGTCGCAGCGAGGTGAGGAAGAAAGTGAGGA	4	84.9	3.05239e+09
201-GT	4	97.6	3.05239e+09
201-GTG	4	97.9	3.05239e+09
196-AGAAAGTGAGG_324-T	4	96.4	3.05239e+09
189-GTGAGGAAGAAAGT	4	95.2	3.05239e+09
20-CTG_33+AGGATCGCCCCGCGAAAATGCATGGGGAACAGGGCAAAAATGCCCGCCAT_51+ATTCAG_66+C_110+ATGCA_153+C_213+CCA_263-ACTAC	4	43	3.05239e+09
132-GT	4	99.1	3.05239e+09
199-AAGTGAG	4	97.3	3.05239e+09
197-GAAAGTGAG_327-A	4	96.1	3.05239e+09
208+AAGG	4	98.2	3.05239e+09
203-GAG_322-T	3	97.3	2.28929e+09
111-GATACGTTAACTGTCTTGGTGGTGAGGATGAGTCGGGCTGTGGGATGGATCAGATGCTACGATCGATGTCGCAGCGAGGTGAGGAAGAAAGT	3	70.8	2.28929e+09
197-GAAAGTGAG_215-G	3	95.5	2.28929e+09
131-GGTGAGGATGAGTCGGGCTGTGGGATGGATCAGATGCTACGATCGATGTCGCAGCGA_206-GA	3	81.9	2.28929e+09
32+GTTTGTTCAAC	3	49	2.28929e+09
28-A_62+CCCAC_95-GGCA_117-TTAAC	3	49	2.28929e+09
199-AAGTGAGG_327-A	3	96.4	2.28929e+09
7+G_200-AGTGAGG	3	97.6	2.28929e+09
22-GCCAGCACGTA_55-GA_104-T_130-T_180+ATAATC	3	43.8	2.28929e+09
21+GT_27+A_75-GAGGGAT_103-GTGT_149-TG_202+TTTTT_248-AC_273+CCG_306-T	3	46.8	2.28929e+09
128-G_207+A	3	97.9	2.28929e+09
203-GAG_321-G	3	97.6	2.28929e+09
20+GGAATCAGCCT_33+AGC_91-ACCGGGCAAGAAGTGTAACG_143+GATT	3	47.9	2.28929e+09
19+ACGTTGGCGGTGCTG_49-T_96+TCGGCGCCTCGA_115+GTCACCGGCCAGCG_197+CTGGCCAATCTGATCT_221+CAACTCTTA_246+TCCC_309+G	3	41.4	2.28929e+09
171-GATCGATGTCGCAGCGAGGTGAGGAAGAAAGTGAG_323-G	3	87.7	2.28929e+09
7-G_197-GAAAGTGAG	3	95.8	2.28929e+09
69+ATA_86+ATGAAATGGAGTTG_113+GTTTTAGAGCTAGAAATAGCAAGTTAAAATAAGGCTAG_122+AACTTGAAAAAGTGGCACCGAGTCGGTGCttttttttACGCGTG_144+A_156-TG_171+CCCA_196+TAGAAAAGTTG	3	61.7	2.28929e+09
20-CT_70-GGGTGGAGGGATCTGTCTACCA_106-TAACGGATAC_121+TC_140-G	3	48.7	2.28929e+09
205-GGAGGAG_326-G	3	96.7	2.28929e+09
277-C	3	98.5	2.28929e+09
33-CT_50-CC_81+CCGCCACCT_120-ACTGTCT_163-GATG_217-T	3	45.9	2.28929e+09
203-GAGGA_324-T	3	98.2	2.28929e+09
8-GT_200-AGTGAGG	3	95.8	2.28929e+09
201-GTGAG_329-G	3	97	2.28929e+09
205-G_320-A	3	97.9	2.28929e+09
194-GAAGAAAGTGAGGA_326-G	3	94.3	2.28929e+09
14-GCGCC_129+GCCAATTAGGTGCGAGAGCACGC_210+TT	3	41.7	2.28929e+09
207+A_301-A	3	99.4	2.28929e+09
201-GTGAGGAGGAGGGT	3	95.5	2.28929e+09
130-T	3	98.5	2.28929e+09
186-GAGGTGAGGAAGAAAGTGAG_323-G	3	92.2	2.28929e+09
10-A_200-AGTG	3	98.2	2.28929e+09
201-GTGAG_323-G	3	96.7	2.28929e+09
207+ATAGTC	3	98.2	2.28929e+09
19-ACTGCCAGCACGTACTG_50+A_83-TGTCT_104-TGTAACGGAT_160+CC_195+GCCGACACAC_252+GC_270+A_288+C_303+TT	3	45	2.28929e+09
61-AT	3	97.9	2.28929e+09
10+A	3	99.4	2.28929e+09
22-GCCAGCACGTA_55-GA_104-T_130-T_186+AGCAACTTATCTGGTT_254+CCTGTAA_276+CAG_297-CGTTAAGCGT	3	44.4	2.28929e+09
206-GA_329-G	3	98.2	2.28929e+09
207+TGA	3	97.6	2.28929e+09
202-TGAGGA_327-A	3	97.9	2.28929e+09
10-A_196-AGAAAGTGAGG	3	96.4	2.28929e+09
23-C_183-AGCGAGGTGAGGAAGAAAGTGAGG	3	91.3	2.28929e+09
9-T_207+A	3	98.5	2.28929e+09
10-A_205+AGAAAG	3	96.4	2.28929e+09
152-GGGATGGATCAGATGCTACGATCGATGTCGCAGCGAGGTGAGGAAGAAAGTGAGGAGGA_327-A	3	80.7	2.28929e+09
288-A	3	98.5	2.28929e+09
20-CTG_33+AGGATCGCCCCGCGAAAATGCATGGGGAACAGGGCAAAAATGCCCGCCAT_51+ATTCAG_66+C_110+ATGCA_153+C_213+CCA_263-ACTAC_322+CGGCCCACGGCTCATCA	3	41.9	2.28929e+09
204-AGGA_325-A	3	97	2.28929e+09
194-GAAGAAAGTGAGGAGGAGGGT_323-G	3	91.9	2.28929e+09
123-GTCTTGGTGGTGA_248-ACAA_273-TGTTCACA_314+TTTTGT	3	41.9	2.28929e+09
20-CTG_33+AGGATCGCCCCGCGAAAATGCATGGGGAACAGGGCAAAAATGCCCGCCAT_51+ATTCAG_66+C_110+ATGCA_151+C_213+CCA_263-ACTAC_322+CGGCCCCCGGCTCATCA	3	41.7	2.28929e+09
10-A_208-GGAGGG	3	97.9	2.28929e+09
207+A_323+G	3	99.4	2.28929e+09
115-CGTTAACTGTCTTGGTGGTGAGGATGAGTCGGGCTGTGGGATGGATCAGATGCTACGATCGATGTCGCAGCGAGGTGAGGAAGAAAGTGAGG	3	70.8	2.28929e+09
207-A_327-A	3	99.4	2.28929e+09
205-GG_323-G	3	98.2	2.28929e+09
30-GTACT_91+ATTTCAACCCGT_108+TCGT_194+TGTTTTGT_235+GCACACG_263+CAAATTTTTGCTTT	3	41.1	2.28929e+09
10-A_201-GTGAG	3	98.2	2.28929e+09
206+GAAGAAAGT	3	96.5	2.28929e+09
20-CTG_33+AGGATCGCCCCGCGAAAATGCATGGGGAACAGGGCAAAAATGCCCGCCAT_51+ATTCAG_66+C_110+ATGCA_153+C_213+CCA_263-ACTAC_323+GGCCCCCGGCTCATCAG	3	41.9	2.28929e+09
200+AGTGATGTCTACTGAAAGTGATGTATAGAAAAGTTGGGTG	3	87.9	2.28929e+09
228-AG	3	98.2	2.28929e+09
203-GAGGAG_324-T	3	97.9	2.28929e+09
19+GA_27+GTTCA_37+AAAG_92+GGGTGGTC_121+AATG_133+C_171-GA_182+ACGATTT_247-T_276-TCACATCGGA	3	46.6	2.28929e+09
13-T_203-GAGGAG	3	97	2.28929e+09
203-GAG_325-A	3	98.5	2.28929e+09
207+A_321-G	3	99.4	2.28929e+09
33-CTGCGCGGGCTGACTGTCCG_65+TC_82+TC_134+tctcttgctctctTTCCTTCAGTCG_174+TTCCG_217+AACATTTGAGCCCT_290+TTGCTTACAATGATTTATCACTTC_315-AA	3	40.3	2.28929e+09
285-A	3	98.2	2.28929e+09
205-GGAGGAGG	3	96.7	2.28929e+09
20-CTG_40+CCCCGCGAAAATGCAT_75+CCAGGGAGTCATTCAGCGTGTAGACCTGGAACACGGTGAAT_110+ATGCA_153+C_213+CCA_263-ACTAC_322+CGGCCCCCGGCTCATCA	3	41.2	2.28929e+09
191-GAGGAAGAAAGTGAG_323-G	3	95.2	2.28929e+09
199-AAGTGAGG_324-T	3	97	2.28929e+09
301-A	3	97.3	2.28929e+09
195-AAGAAAGT	3	97.3	2.28929e+09
199-AAGTGAGG_329-G	3	96.1	2.28929e+09
14-G_199-AAGTGAGG	3	96.4	2.28929e+09
128-G	3	98.8	2.28929e+09
203-GAGGAG_329-G	3	97	2.28929e+09
206-GAGGA_327-A	3	98.2	2.28929e+09
20-CTG_40+CCCCGCGAAAATGCAT_75+CCAAGGAGTCATTCAGCGTGTAGACCTGGAACACGGTGAAT_110+ATGCA_153+C_213+CCA_263-ACTAC_322+CGGCCCCCGGCTCATCA	3	40.7	2.28929e+09
215-G	3	98.2	2.28929e+09
206-GA_325-A	3	97.9	2.28929e+09
325+A	3	98.5	2.28929e+09
161-C	3	98.5	2.28929e+09
207+AGAGTC	3	98.2	2.28929e+09
208+T	3	99.7	2.28929e+09
223-CA	3	99.1	2.28929e+09
19-ACTGCCA_58+CTTTA_126-TTG_172+GGCGT_205-GG_260+CGGCAAA_278+G	3	43.4	2.28929e+09
203-GAGGAG_321-G	3	93.4	2.28929e+09
253-G	3	94	2.28929e+09
185-CGAGGTGAGGAAGAAAGTGA	3	93.7	2.28929e+09
56-A	3	98.5	2.28929e+09
267-C	3	99.1	2.28929e+09
14-G_200-AGTGAGG	3	96.4	2.28929e+09
89-C	3	98.8	2.28929e+09
208-GG_321-G	3	97.6	2.28929e+09
74-G	3	99.1	2.28929e+09
20-CTG_33+AGGATCGCCCCGCGAAAATGCATGGGGAACAGGGCAAAAATGCCCGCCAT_51+ATTCAG_66+C_110+ATGCA_153+C_213+CAA_263-ACTAC_322+CGGCCCCCGGCTCATCA	3	41.7	2.28929e+09
20-CTG_33+AGGATCGCCCCGCGAAAATGCATGGGGAACAGGGCAAAAATGCCCGCCAT_51+ATTCAG_66+C_110+ATGCA_155+GCTC_263-ACTAC_322+CGGCCCCCGGCTCATCA	3	41.2	2.28929e+09
198-AAAGT	3	97.6	2.28929e+09
323+G	3	98.2	2.28929e+09
207+AAAGAC	3	97.9	2.28929e+09
207+GTGGGTGGTAGTGCCACACAGAGAGCTGAGGGAAGGTGGTGAAAGTGA	2	87.1	1.52619e+09
19+ACG_39+TCGCT_59+ATCCGATCGT_107+GATCGGGATA_166+AGCGAAG_188+CGATT_211+CATTGGGGGCGGCTTTCC_286+GTCGGACATTCGCATCATTGC	2	42.6	1.52619e+09
12-AT	2	97.3	1.52619e+09
170+T_188-GGTGAG_224+TGA_255+GGGATT_273+AAAGGTTGTCTTA_287+CAGGAAGAAGGC	2	45.5	1.52619e+09
10-A_188-GGTGAGGAAGAAAGTGAG	2	93.1	1.52619e+09
20-CTG_40+CCCCGCGAAAATGCAT_80-AT_97-C_143-T_163+CCCGT_185+GCGGCGGCTTGCGCGGCT_227+CCGC_252+AACATCAGGTCGCTCATGTCGG_322+CGGCCCCCGGCTCATCA	2	42.5	1.52619e+09
205-GGAGGAGGG	2	95.8	1.52619e+09
201-GTGAGG_271-A	2	97.3	1.52619e+09
193-GGAAGAAAGTGAGGAGGAG_271-A	2	93.4	1.52619e+09
72-GT	2	98.5	1.52619e+09
207-A_321-GT	2	97.9	1.52619e+09
63+TGATGATG_147+TAC_164+TTTTACC_189+C_221-GCCA_237-CGGATGTGGATA_281+AAC	2	43.2	1.52619e+09
201-GTGAG_326-G	2	97	1.52619e+09
203+GAG_323-G	2	97.6	1.52619e+09
13-T_199-AAGTGAGG	2	96.4	1.52619e+09
196-AGAAAGTGAGG_326-G	2	95.5	1.52619e+09
202-TGAGGA_325-A	2	96.4	1.52619e+09
188-G	2	98.5	1.52619e+09
197-GAAAGTGAGG_324-T	2	94.9	1.52619e+09
195-A	2	98.2	1.52619e+09
207+AGGAGTGTATAAGAACCAC	2	93.4	1.52619e+09
208-GGAGG_326-G	2	96.7	1.52619e+09
94-G_201-GTGAGG	2	96.1	1.52619e+09
109-C	2	98.2	1.52619e+09
22+CGTC	2	62	1.52619e+09
21+CAGGACGAAAGGA_42+GAACAGGGCAAAAATGCCCGCCAT_63+CAGCGTGTAGACCTGG_110+ATGCA_153+C_213+CCA_263-ACTAC_322+CGGCCCCCGGCTCATCA	2	41.4	1.52619e+09
325-AGAA	2	97.6	1.52619e+09
200-AGTGAGG_325-A	2	96.1	1.52619e+09
20-CTG_33+AGGATCGCCCCGCGAAAATGCATGGGGAACAGGGCAAAAATGCCCGCCAT_51+ATTCAG_66+C_110+ATGCA_153+C_213+CCA_263-ACTAC_322+CGGCGCCCGGCTCATCA	2	41.7	1.52619e+09
9-TA_132-GTGAGGATGAGTCGGGCTGTGGGATGGATCAGATGCTACGATCGATGTCGCAGCGAGGTGAGGAAGAAA	2	77.4	1.52619e+09
196-AGAAAGTGAGG_249-C	2	94.9	1.52619e+09
28-ACGT_78-GGAT_177+ACG_216+CCCAGCCC_225+C_304-CGT_315-AA	2	43.3	1.52619e+09
69-GG	2	97.9	1.52619e+09
204-AGGA_321-G	2	97.3	1.52619e+09
207-A_326-G	2	99.1	1.52619e+09
208-GGAGGGTG_329-G	2	97.3	1.52619e+09
7-G_203-GAGGA	2	96.7	1.52619e+09
58+CACC_70+AC	2	45.9	1.52619e+09
201-GTGAG_324-T	2	97.6	1.52619e+09
20-CTG_40+CCCCGCGAAAATGCAT_80-AT_97-C_143-T_167+TGGCCCGTCCT_185+GCTTGCGCGGCT_227+CCAC_252+AACATCAGGTCGCTCATGTCGG_322+CGGCCCCCGGCTCATCA	2	42.3	1.52619e+09
190-TGAGGAAGAAAGTGA_325-A	2	93.7	1.52619e+09
152-G_195-AAGAAAGTGAGGA	2	94.3	1.52619e+09
220+GC_322+GATTTTGTTTTGCTCT	2	41.9	1.52619e+09
13-T_196-AGAAAGTGAGG	2	94.9	1.52619e+09
205+AG_324-TAGA	2	97.6	1.52619e+09
52-G_203-GAG	2	98.8	1.52619e+09
7-G_203-GAG	2	98.8	1.52619e+09
208+gtgtggtagtggagtgtggagtgtggaggagtgt	2	89.3	1.52619e+09
206-GAGGA_324-T	2	98.2	1.52619e+09
125-CTTGGTGGTGAGGATGAGTCGGGCTGTGGGATGGATCAGATGCTACGATCGATGTCGCAGCGAGGTGAGGAAGAAAGTGAGGA_329-G	2	73.5	1.52619e+09
20-CTG_33+AGGATCGCCCCGCGAAAATGCATGGGGAACAGGGCAAAAATGCCCGCCAT_51+ATTCAG_66+C_110+ATGCA_153+T_213+CCA_263-ACTAC_322+CGGCCCCCGGCTCATCA	2	41.7	1.52619e+09
10-A_169-ACGATCGATGTCGCAGCGAGGTGAGGAAGAAAGTGAGGA	2	86.1	1.52619e+09
17+C_28-ACGTACT_56-ATGCGATGTA_89-C_107-A_134+C_165-TGC_189+TCTTTCCT_208+TGCCTG	2	50.4	1.52619e+09
205+AGGGGGCTGG	2	96.5	1.52619e+09
10-A_75-GAGGGATCTGTCTACCACCGGGCAAGAAGTGTAACGGATACGTTAACTGTCTTGGTGGTGAGGATGAGTCGGGCTGTGGGATGGATCAGATGCTACGATCGATGTCGCAGCGAGGTGAGGAAGAAAGT	2	59.3	1.52619e+09
74-G_203-GAGGAG	2	97	1.52619e+09
190-TGAGGAAGAAAGTGA_323-G	2	93.7	1.52619e+09
37-GCGGGCTGACTGTCCGGGG_76-AGGGATC_116+CA_137+C_176+AGTCGGGCAC_265-TACCGTATTGTTCACAT	2	44.1	1.52619e+09
188-GGTGAG_208+T_329-G	2	95.5	1.52619e+09
157-GGATCAGATGCTACGATCGATGTCGCAGCGAGGTGAGGAAGAAAGTGA_323-G	2	84	1.52619e+09
33-CTGCGCGGGCTGACTGTCCG_65+TC_82+TC_125+ctctctttctcttgctctctTTC_174+TTCCG_217+AACATTTGAGCCCT_290+TTGCTT_311+CAGCGGTTCAACGTT	2	41.1	1.52619e+09
20-CTG_33+AGGATCGCCCCGCGAAAATGCATGGGGAACAGGGCAAAAATGCCCGCCAT_51+ATTCAG_66+C_110+ATGCA_153+C_213+CCA_263-ACTACC_322+CGGCCCCCGGCTCATCA	2	41.2	1.52619e+09
18+CCGCCAT_67-CTGGGGTG_110+ATGCA_153+C_213+CCA_263-ACTAC_322+CGGCCCCCGGCTCATCA	2	43.6	1.52619e+09
203-GAGGAG_325-A	2	96.7	1.52619e+09
200-AGTGAGGAGG_321-G	2	96.7	1.52619e+09
34+G_48+G_147+TAATAGATT	2	43.9	1.52619e+09
208-GGAGGGTG_323-G	2	97.3	1.52619e+09
78-GGATCTGTCTACCACCGGGCAAGAAGTGTAACGGATACGTTAACTGTCTTGGTGGTGAGGATGAGTCGGGCTGTGGGATGGATCAGATGCTACGATCGATGTCGCAGCGAGGTGAGGAAGAAAGTGAGGA	2	60.2	1.52619e+09
208+GGGAAGGT	2	95.9	1.52619e+09
14-G_204-AGGA	2	97.3	1.52619e+09
20-CTG_33+AGGATCGCCCCGCGAAAATGCATGGGGAACAGGGCAAAAATGCCCGCCAT_51+ATTCAG_66+C_110+ATGCA_153+C_213+CCA_263-ACTAC_322+CGGCCCCGGCTCATCA	2	41.8	1.52619e+09
14-G_207+A	2	98.2	1.52619e+09
34+G_48+G_104-TGT_134-GA_164+GGTGT_174+TTTGTTTTGC	2	47.5	1.52619e+09
203+GGTA	2	97	1.52619e+09
200-AGTGAGG_271-A	2	96.4	1.52619e+09
207-A_325-A	2	97.9	1.52619e+09
20-CTG_33+AGGATCACCCCGCGAAAATGCATGGGGAACAGGGCAAAAATGCCCGCCAT_51+ATTCAG_66+C_110+ATGCA_153+C_213+CCA_263-ACTAC_322+CGGCCCCCGGCTCATCA	2	41.7	1.52619e+09
139-TGAGTCGGGCTGTGGGATGGATCAGATGCTACGATCGATGTCGCAGCGAGGTGAGGAAGAAAGTGAGGAGGAGG	2	77.7	1.52619e+09
200+AGTGAAAGTATCAACTTGAAAAAGTGGCACCGAGTCGGTGCttttttttACGCGTGGGTCCCATGGGTGAGGTGGAGTACGCGCCCGGGGAGCTCAAAGGTTACCCCAGTTGGGGGGCGCGCCCAACTTTGTATAGAAAAGTTGGGTG	2	68.3	1.52619e+09
166-GCTACGATCGATGTCGCAGCGAGGTGAGGAAGAAAGTGAGGA_321-GT	2	85.8	1.52619e+09
204+AAGTGCCACACAGGTAGTGCCACAC	2	92.2	1.52619e+09
203-GAG_322+T	2	97.3	1.52619e+09
189-GT	2	98.2	1.52619e+09
195-A_207+A	2	98.2	1.52619e+09
198-AAAGTGAGGA_327-A	2	95.5	1.52619e+09
20+GGCCAGTTAGTAGAC_63+AACG_138+ACAGGCGCGCCA_199+GTTG_264-CTACCGTATTG	2	43.3	1.52619e+09
127-TGGTGGTGAGGATGAGTCGGGCTGTGGGATGGATCAGATGCTACGATCGATGTCGCAGCGAGGTGAGGAAGAAAGTGAGGA	2	75.6	1.52619e+09
94-G_203-GAGGAG	2	97.9	1.52619e+09
19+AGCAGAAGATCTCGGGCCGGAACA_38+GA_64+CGGTCT_125+CGGG_147+TCCT	2	47.6	1.52619e+09
205-G_329-G	2	97.6	1.52619e+09
50-CCGGGGATGCGATGTATCTGGGGTGGAGGGATCTGTCTACCACCGGGCAAGAAGTGTAACGGATACGTTAACTGTCTTGGTGGTGAGGATGAGTCGGGCTGTGGGATGGATCAGATGCTACGATCGATGTCGCAGCGAGGTGAGGAAGAAAGTGAGGA_323-G	2	52.1	1.52619e+09
197-GAAAGTGAG_326-G	2	95.8	1.52619e+09
21+CAGCT_68-TGGGGTGGA_95+TTCCTC_127+g	2	52.9	1.52619e+09
207+AAAGTGAA_324-T	2	95.9	1.52619e+09
186-GAGGTGAGGAAGAAAGTGAGGA_324-T	2	91.6	1.52619e+09
183-AGCGAGGTGAGGAAGAAAGTGAGGA_323-G	2	91	1.52619e+09
204+GAGCAGCGAGGCGAGGA	2	93.4	1.52619e+09
197+CTG	2	82.5	1.52619e+09
164-ATGCTACGATCGATGTCGCAGCGAGGTGAGGAAGAAAGTGAGGA_329-G	2	86.4	1.52619e+09
327+A	2	98.8	1.52619e+09
175-GATGTCGCAGCGAGGTGAG_202-TGA	2	91.9	1.52619e+09
193-GGAAG	2	96.1	1.52619e+09
243-T	2	98.2	1.52619e+09
187-AGGTGAGGAAGA	2	96.4	1.52619e+09
281-T	2	88.6	1.52619e+09
30-G_54-GGA_68-TGGG_87-TACCACCGGGCA_119-AACTGTC_152-G_230+GT_295-GACGTTAAGCG	2	45.2	1.52619e+09
198-AAAGTGA	2	96.7	1.52619e+09
317-GC	2	97.9	1.52619e+09
205+CGTG	2	95.2	1.52619e+09
208+AGAAAGT	2	97.9	1.52619e+09
198-A	2	98.2	1.52619e+09
21+GT_27+A_75-GAGGGAT_103-GTGT_149-TG_203-GAGGAGG_234-CTT_275-TT_285+TGTCC	2	46.2	1.52619e+09
206-GAGGA_327+A	2	97.9	1.52619e+09
194-GAAGAAAGT	2	97.3	1.52619e+09
144-C_198-AAAGTGAGGA	2	96.7	1.52619e+09
20-CTG_33+AGGATCGCCCCGCGAAAATGCATGGGGAACAGGGCAAAAATGCCCGCCAT_51+ATTCAG_66+C_110+ATGCA_153+C_213+CCA_263-ACTAC_322+CGGCCCCCGGATCATCA	2	41.7	1.52619e+09
20-CTG_33+AGGATCGCCCCGCGAAAATGCATGGGGAACAGGGCAAAAATGCCCGCCAT_51+ATTCAG_66+C_110+ATGCA_153+C_213+CCA_263-ACTAC_322+CGGCCGCCGGCTCATCA	2	41.7	1.52619e+09
207+AGAAAGTA	2	96.2	1.52619e+09
189-GTGAGGAAGAAA_322-T	2	96.1	1.52619e+09
266-A	2	97.3	1.52619e+09
107-A_198-AAAGTGAGGA	2	95.5	1.52619e+09
207+A_327+A	2	98.2	1.52619e+09
196-AGAAAGTGAGG_322-T	2	96.4	1.52619e+09
192-A	2	98.5	1.52619e+09
208-GG_326-G	2	98.2	1.52619e+09
307-G	2	89.8	1.52619e+09
10-A_203-GAGGA	2	96.7	1.52619e+09
187-AGGTGAGGAAGAAAGTGAGGA_323-G	2	91.9	1.52619e+09
222-C	2	99.7	1.52619e+09
61-A	2	97	1.52619e+09
41-GC_78-GGA_98+A_129-GTGGT_150-GTGG_186-GAGGTGA_216-GTA_270-TA	2	44.6	1.52619e+09
20-CTG_40+CCCCGCGAAAATGCAT_80-AT_97-C_143-T_167+TGGCCCGTCCT_185+GCTTGCGCGGCT_226+TCCG_252+AACATCAGGTCGCTCATGTCGG_322+CGGCCCCCGGCTCATCA	2	42.3	1.52619e+09
203+GAGGAA	2	98.2	1.52619e+09
260-GA	2	98.8	1.52619e+09
203-GAG_326-G	2	97.6	1.52619e+09
250-A	2	91.6	1.52619e+09
195-AAGAAAGTGAGGAGGAGGGTGGTA_324-T	2	91	1.52619e+09
189-GTGAGGAAGAAAGTGAGGA_326-G	2	94	1.52619e+09
207+GTGGTGGGAGGGAGGGA	2	94	1.52619e+09
45-ACTGTCCGGGGATGCGATGTAT_193-GG_226+TG_283-GG	2	41.9	1.52619e+09
29+TAGC_81-TCTGTCT_125-CTTGGTGGTGAGGATGA_153-GGAT_224-ACACA_245+ATA_270+GCGGAACGGCACAC_307-GCCGGA	2	43.3	1.52619e+09
207+GAA	2	97.9	1.52619e+09
144+GCGCCACC_156+CC_181+AGCGCCACCA_187+GTGGC_223+A_259-TGA_278+GTCCAGCA_300+GCCCGACCGGCTGA	2	49.6	1.52619e+09
197-GAAAGTGAG_324-T	2	95.5	1.52619e+09
52-G_194-GAAGAAAGTGAGGA	2	94	1.52619e+09
36+AAATGAAAA_86-CTA_156+GCTTTT	2	43	1.52619e+09
291+C	2	93.1	1.52619e+09
69-G_207+A	2	99.1	1.52619e+09
13-T_127-TGGTGGTGAGGATGAGTCGGGCTGTGGGATGGATCAGATGCTACGATCGATGTCGCAGCGAGGTGAGGAAGAAAGTGAGGA	2	75.3	1.52619e+09
263-A	2	88.9	1.52619e+09
291+C_322-T	2	88.9	1.52619e+09
143-TCGGGCTGTGGGATGGATCAGATGCTACGATCGATGTCGCAGCGAGGTGAGGAAGAAAGTGAGGA	2	80.4	1.52619e+09
50-CCGGGG_76+CC_98+TTG_127+C_205+TATT_223+TCGGAGCCTGAT_258+CCTTCGAT_269-G_298-GTTAA	2	47.1	1.52619e+09
205+CCACTT	2	92.6	1.52619e+09
205-G_323-G	2	98.2	1.52619e+09
92-C	2	98.2	1.52619e+09
191-GAGGAA_208+T	2	96.4	1.52619e+09
217-TAGTGC	2	91.6	1.52619e+09
195-AAGAAA	2	88.3	1.52619e+09
312-A	2	98.2	1.52619e+09
136-G	2	98.2	1.52619e+09
21+CAGGACGAAAGGATCGCCCCGCGAAAATGCATGGGGAACAGGGCAAAAA_38+GCCA_66+C_110+ATGCA_153+C_213+CCA_263-ACTAC_322+CGGCCCCCGGCTCATCA	2	42.2	1.52619e+09
196-AGAAAG	2	94.6	1.52619e+09
189-GTGAGGAAGAAAGTGAGGA_324-T	2	93.1	1.52619e+09
50+C	2	99.1	1.52619e+09
197-GAAAGTGAG_258-C	2	88.3	1.52619e+09
206+GAAAGT	2	98.2	1.52619e+09
117-T	2	98.5	1.52619e+09
205+GGGGGGCTGG	2	96.8	1.52619e+09
207+AAAAGC	2	97.9	1.52619e+09
176-ATGTCGCAGCGAGGTGAGGAAGAAAGTGAGGA_324-T	2	90.1	1.52619e+09
312+A	2	91	1.52619e+09
175-GATGTCGCAGCGAGGTGAGGAAGAAAGTGAG_327-A	2	88.9	1.52619e+09
205+GGAAAG	2	98.2	1.52619e+09
200-AGTGAGGAGGAGGGTGGTAGTGCCACACAGAGAGCTTCGGATGTGGATACAACGGAAGCTGAGACTACCGTATTGTTC	2	72.6	1.52619e+09
52-G_207-A	2	97.9	1.52619e+09
20-CTG_33+AGGATCGCCCCGCGAAAATGCATGGGGAACAGGGCAAAAATGCCCGCCAT_51+ATTCAG_66+C_110+ATGCA_153+C_213+CCA_263-AC_296+C_320+GCCCCCGGCTCAT	2	42.7	1.52619e+09
10-A_195-AAGAAAGTGAGGA	2	94.3	1.52619e+09
77-G_202-TGAGGA	2	97	1.52619e+09
33-CTGCGCGGGCTGACTGTCCG_83+G_116+AGCA_162-AGA_203+ACTCTGACCCCGGCC_259-T_264+CCAG_282+GCCGGATA	2	44	1.52619e+09
20-CTG_33+AGGATCGCCCCGCGAAAATGCATGGGGAACAGGGCAAAAATGCCCGCCAT_51+ATTCAG_66+C_111+TGCAT_153+C_213+CCA_263-ACTAC_322+CGGCCCCCGGCTCATCA	2	41.9	1.52619e+09
200-AGTGAGGAGG_323-G	2	95.2	1.52619e+09
13-T_207+A	2	98.2	1.52619e+09
201-GTGAGG_326-G	2	97.9	1.52619e+09
33-CTGCGCGGGCTGACTGTCCG_65+TC_82+TC_134+tctcttgctctctTTCCTTCAGTCG_174+TTCCG_217+AACATTTGAGCCCT_290+TTGCTT_311+CAGCGGTTCAACGTT	2	41.1	1.52619e+09
203+G	2	99.1	1.52619e+09
9+T_180-CGCAGCGAGGTGAGGAAGAAAGTGAGG	2	85.6	1.52619e+09
101-A	2	97.6	1.52619e+09
279-C	2	95.8	1.52619e+09
203-GAG_275-T	2	97.6	1.52619e+09
208+AGAAGG	2	96.7	1.52619e+09
20-CTG_40+CCCCGCGAAAATGCAT_70+C_81-TCT_97-C_143-T_167+TGGCCCGTCCT_185+GCTTGCGCGGCT_227+CCGC_252+AACATCAGGTCGCTCATGTCGG_322+CGGCCCCCGGCTCATCA	2	43.4	1.52619e+09
20+C_57+ACAGGGCAAAAATGCCCGCCATCAGCGCGGCC_75+TAGACCTGGAACACGGTGAAT_110+ATGCA_153+C_213+CCA_263-AC_296+C_320+GCCCCAGGCTCAT	2	42.5	1.52619e+09
14-G_206-GAGGA	2	98.2	1.52619e+09
125-CTTGGTGGTGAGGATGAGTCGGGCTGTGGGATGGATCAGATGCTACGATCGATGTCGCAGCGAGGTGAGGAAGAAAGTGAGG	2	74.1	1.52619e+09
7+G_197-GAAAGTGAGG	2	95.5	1.52619e+09
152-G_207+A	2	98.8	1.52619e+09
175-GATGTCGCAGCGAGGTGAGGAA	2	91	1.52619e+09
201-GTGAG_325-A	2	97.3	1.52619e+09
248+A	2	90.4	1.52619e+09
14-GC	2	98.2	1.52619e+09
127-TGGTGGTGAGGATGAGTCGGGCTGTGGGATGGATCAGATGCTACGATCGATGTCGCAGCGAGGTGAGGAAGAAAGTGAGGA_249-C_262+G_324-T	1	67.9	7.63097e+07
169-ACGATCGATGTCGCAGCGAGGTGAGGAAGAAAGTGAGGA	1	88.3	7.63097e+07
20-CTG_33+AGGATCGCCCCGCGAAAATGCATGGGGAACAGGGCAAAAATGCCCGCCAT_51+ATTCAG_66+C_110+ATGCA_153+C_210+CTA_263-ACTAC_322+CGGCCCCCGGCTCATCA	1	41.7	7.63097e+07
20-CTG_40+CCCCGCGAAAATGCAT_80-AT_97-C_143-T_167+TGGCCCGTCCT_185+GCTTGCGCGGCT_226+TCCG_271+CGGTTGTCGTGTAGCTCAGGAA_322+CTGCCCACGGATCAACA	1	42	7.63097e+07
20-CTG_35+GATCGCCCCGCGAAAATGCATGGGGAACAGGGCAAAAATGCCCGCCATCA_51+ATTCAG_74+A_110+ATGCA_153+C_202+CCA_263-AC_296+C_320+GCCCCCGGATCAT	1	43	7.63097e+07
310+G	1	91.3	7.63097e+07
27-CACGT_108-ACG_166-GCTACG_187-A	1	44.4	7.63097e+07
13-T_198-AAAGTGAGGA	1	95.8	7.63097e+07
203+GAGGAGCGTATAGAAAAAGTATATTGTATAGCAAAGTTGGGTGAGA	1	86.8	7.63097e+07
195+AGT	1	97.3	7.63097e+07
281-T_313+G	1	86.5	7.63097e+07
19+G_40+TCATTC_67+GAGAGAGGGGCCG	1	46.3	7.63097e+07
22-GCCAGCACGTA_55-GA_104-T_130-T_142-GTC_163+T_180+TTATAATC	1	45.2	7.63097e+07
200+AGTGAAAGTATCAACTTGAAAAAGTGGCACCGAGTCGGTGCttttttttACGCGGGGGTACCATGGGTGAGGTGGAGTACGCGCCCGGGGAGCGCAAAGGTTTCCCCAGTTGGGGGGCGCGCGCAAGTTTGTATAGAAAAGTGGGGTG	1	68.3	7.63097e+07
203+GGAGCAGCGAGGAGAGG	1	93.1	7.63097e+07
206+GAGAAAAT	1	96.8	7.63097e+07
200+ACAACTTTATTATACAAAGTTGTGGCGccccccccAACTGGGGTAACCTTTGGGCTCACCGGGCGCGTACTCCAGCTCAAGTCTGCGATCGCTCCGGAAAGATACATTGATGAGTTTGGACAACGAACAGCGTAAGTG	1	69.8	7.63097e+07
203-GAGGAG_246+T_282-C	1	87.1	7.63097e+07
10-A_86-CTACCACCGGGCAAGAAGTGTAACGGATACGTTAACTGTCTTGGTGGTGAGGATGAGTCGGGCTGTGGGATGGATCAGATGCTACGATCGATGTCGCAGCGAGGTGAGGAAGAAAGTGAGGA	1	62.3	7.63097e+07
238-GGATGT	1	89.5	7.63097e+07
222-CCACAC	1	91.3	7.63097e+07
20-CTG_33+AGAATCGCCCCGCGAAAATGCATGGGGAACAGGGCAAAAATGCCCGCCAT_51+ATTCAG_66+C_110+ATGCA_153+C_213+CCA_263-ACTAC_322+CGGCCCCCGGCTCATCA	1	41.7	7.63097e+07
200+AGTGATAGTGAGGAGGGAG	1	94.6	7.63097e+07
207+TAA	1	97.3	7.63097e+07
307+G	1	89.8	7.63097e+07
20-CTG_33+AGGATCGCCCCGCGAAAATGCATGGGGAACAGGGCAAAAATGCCCGCCAT_51+ATTCAG_66+C_110+ATGCA_153+C_213+CCA_263-ACTAC_322+CTGCCCCCGGCTCATCA	1	41.7	7.63097e+07
235-T	1	99.4	7.63097e+07
207+AAAGGT	1	97.3	7.63097e+07
20-CTG_40+CCCCGCGAAAATGCAT_80-AT_97-C_143-T_167+TGGCCCGTCCT_185+CCTTGCGCGGCT_226+TCCG_252+AACATCAGGTCGCTCATGTCGG_322+CGGCCCCCGGCTCATCA	1	41.8	7.63097e+07
203+GAGAAC	1	95.9	7.63097e+07
170-CGATCGATGTCGCAGCGAGGTGAGGAAGAAAGTGAGGAG	1	86.7	7.63097e+07
74-G_202-TGAGGA	1	82.8	7.63097e+07
207-A_321-G	1	90.4	7.63097e+07
20-CTG_33+AGGATCGCCCCGCGAAAATGCATGGGGAACAGGGCAAAAATGCCCGCCAT_51+ATTCAG_66+C_110+ATGCA_153+T_213+CCA_263-ACTAC_322+CGGCCCACGGCTCATCA	1	41.7	7.63097e+07
9-T_200-AGTGAGG	1	96.4	7.63097e+07
205-GGAGG	1	88	7.63097e+07
66+GG_95-GGCAAGA_132-GTGAGGA_157-GGATCAG_188-GGT_237+ACCCACCA_277-C_290+TTCG	1	49.1	7.63097e+07
208+AAGACC	1	97.6	7.63097e+07
20-CTGCCAGCACGTACTGC_60-GATGT_87-T_162+T_192+T	1	43.6	7.63097e+07
107-AAC_140+CGCCGTTAGC_149+AG_162+ACCCGT_190+GCTTGAGCGGCTT_212+ATACGC_226+CG_252+AACATCAGGTCGCTCATGTCGG_322+CGGCCCCCGGCTCATCA	1	42	7.63097e+07
202-TGAGGA_303+G	1	89.2	7.63097e+07
20-CTGCCAG	1	57.4	7.63097e+07
264+C_282-C	1	91	7.63097e+07
204+AGCGAAGAGAACGTCGTGTGCGA	1	91.5	7.63097e+07
186-GAGGTGAGGAAGAAAGT_328+G	1	87.9	7.63097e+07
200+AGTGAGGTCCCATGGGTGAGGTGGAGTACGCGCCCGGGGAGCCCAAAGGTTACCCCAGTTGGGGGGTGCGCCCAACTTTGTATAGAAAAGTTGGGTG	1	76.2	7.63097e+07
20+CCAGGACGAAAGAATCGCCCCGCGAAAATGCATGGGGAACAGGGCAAAAATGC_66+C_110+ATGCA_155+GCTC_263-ACTAC_322+CGGCCCCAGGCTCATCA	1	39.6	7.63097e+07
20-CTG_40+CCCCGCGAAAATGCAT_80-AT_97-C_143-T_167+TGGCTCGTCCT_185+GCTTGCGCGGCT_227+CCGC_252+AACATCAGGTCGCTCATGTCGG_322+CGGCCCCCAGCTCATCA	1	42.3	7.63097e+07
21-TG_51+AAT_65-A	1	86.9	7.63097e+07
222-C_298+G_324-T	1	90.4	7.63097e+07
17-C_197-GAAAGTGAG	1	94.3	7.63097e+07
243+T_261-A	1	91.3	7.63097e+07
315+A	1	93.1	7.63097e+07
303-G	1	78	7.63097e+07
20+C_57+ACAGTGCAAAAATGCCCGCCATCAGCGCGGCC_75+TAGACCTTGAACACGGTGTAT_110+ATGCA_153+C_202+CCA_263-AC_298+CATCGAGCCAAACA	1	42.1	7.63097e+07
9+T_180-CGCAGCGAGGTGAGGAAGAAAGTGAGG_281-T_323-G	1	84.4	7.63097e+07
207+CCAAAC	1	97	7.63097e+07
20-CTG_40+CCCCGCGAAAATGCAT_80-AT_97-C_143-T_167+TGGCCCGTCCT_185+GCTTGCGCGGCT_227+CCGC_252+AACATTAGGTCGCTCATGTCGG_322+CGGCCCCCGGCTCATCA	1	42.5	7.63097e+07
33+ATCGCCCCGCGAAAATGCATGGGGAACAGGGCAAAAATGCCCGCCAT_51+ATTCAG_66+C_110+ATGCA_153+C_209+GCT_263-ACTAC_322+CGGCCCCAGGATCATCA	1	41.3	7.63097e+07
200+AGTGAGGTTACCCCAGTTGGGGGGCGCGCCCAACTTTGTATAGAAAAGTTGGGTG_323-G	1	84.5	7.63097e+07
193-GGAAGAAAGTGAG_267+CGAGCTGCGTAAAAGGAAACGAAGCAAACAGAGACAG	1	79.4	7.63097e+07
20-CTG_40+CCCCGCGAAAATGCAT_80-AT_97-C_143-T_167+TGGCCCGTCCT_185+GCTTGCGCGGCT_227+CCGC_252+AACATCAGGTCGCTCATGTCGG_322+CGGCACCCGGCTCATCA	1	42.5	7.63097e+07
247-T	1	97.3	7.63097e+07
264-C_312+A	1	89.8	7.63097e+07
146+TA_202+GGT	1	72.1	7.63097e+07
17-C_193-GGAAGAAAG	1	95.2	7.63097e+07
21+GCAT_28+GTCACGT_61+TCGATCACCT_111-GA_123-GTCTTGGTGG_194+AGCTCTCACTCTC_212+ATTTAACATTCAACTCCATAGCAGAACTCTAA_248+GA_268-CGT_314+ACTACGT	1	43.2	7.63097e+07
206+TGCttttttttGAGCGGGGGTCTCATGGGTGAGGTGGAGTACGCGCGCGTGAAGCCCAAAGGGTACCCCAGTTGGGTGGCGCGCCCAACTTTGTATAGAAAAGTTGGGTGAATGAA	1	73	7.63097e+07
52-GG_202-TGAGGA	1	97.3	7.63097e+07
180-CGCAGCGAGGTGAGGAAGAAAGTGAGGAGG	1	88.3	7.63097e+07
301-AAGCGTGCCGGA	1	89.8	7.63097e+07
204+AAGAAA	1	97.3	7.63097e+07
152-GGGATGGATCAGATGCTACGATCGATGTCGCAGCGAGGTGAGGAAGAAAGTGAGGA_260-GA	1	81.3	7.63097e+07
222-CC	1	97.9	7.63097e+07
204+AAGACGT	1	85.8	7.63097e+07
12-AT_200-AGTGAGG	1	96.4	7.63097e+07
122-TGTCTTGGTGGTGAGGATGAGTCGGGCTGTGGGATGGATCAGATGCTACGATCGATGTCGCAGCGAGGTGAGGAAGAAAGTGAGGAGGA	1	72.9	7.63097e+07
20-CTG_40+CCCCGCGAAAATGCAT_79-GA_97-C_143-T_167+TGGCCCGTCCT_185+GCTTGCACGGCT_227+CCGC_252+AACGTCAGGTCGCTAATGTCGG_322+CGGCCCCCGGCTCATCA	1	42.3	7.63097e+07
20+C_56+AACAGGGCAAAA_80-AT_97-C_143-T_167+AGGCCAGTCCT_238+ACCG_288+GCGGGTAGCTCAGGAAAGTAGCCATCACGCTTA_309+CAAA_320+GCCCCCGGCTCAT	1	43.4	7.63097e+07
240-ATGT_248-ACAACG_273+AAAGGTTGTCTTA_287+CAGGAAGAAGGC	1	43.2	7.63097e+07
20-CTG_33+AGGATCGCCCCGCGAAAATGCATGGGGAACAGGGCAAAAATGCCCGCCAT_51+ATTCAG_66+C_110+ATGCA_153+C_194+CCCCTC_220-TGC_263-ACTAC_322+CGGCCCCCGGCTCATCA	1	42.1	7.63097e+07
9-T_200-AGTGAGGAGGAGGGTGGTAGTGCCACACAGAGAGCTTCGGATGTGGATACAACGGAAGCTGAG_286-AGAAACGACGACGTT	1	72.9	7.63097e+07
203+GAGGAG	1	96.2	7.63097e+07
20-CTG_40+CCCCGCGAAAATGCAT_80-AT_97-C_143-T_167+TGGCCCGTCCT_185+GCTTGCGCGGCT_227+CCCG_257+CAAGTCG_265+G_303+ACAAAACACGCCCATCGGG_320+CCCCCGGCTCAT	1	43	7.63097e+07
191-GAGGAAGAAAGTG	1	94	7.63097e+07
28+TG_48+TTTGGGCGTCTC_68-TG_141+T_176+TGCGA	1	50.2	7.63097e+07
207+ATGAGAAAGTGAGCTATATAGAAAAGATGGGAGAAAGAAA	1	88.7	7.63097e+07
23+GC_93-CG_149+A_166+A	1	51.8	7.63097e+07
232+A	1	94.6	7.63097e+07
20-CTG_40+CCCCGCGAAAATGCAT_70+C_91+GTGTAG_115+GTCGC_135+TTTCATGC_172-A_227+CCGC_252+AACATCAGGTCGCTCATGTCGG_322+CGGCCCCCAGCGCATCA	1	42.8	7.63097e+07
56+GAACAGGGCAAAAATGCCCGCCATCAGCGCGGCCAGGGAGTC_67+AGACCTGGAACA_110+ATGCA_153+C_213+CCA_263-ACTAC_309+CAAA_319+GGCCCCAGGCTCA	1	42	7.63097e+07
7+G_222-C	1	97.9	7.63097e+07
203-GAGGAG_292-G	1	87.3	7.63097e+07
205+GGATAG	1	97.3	7.63097e+07
201-GTGAGGAG_252+AG	1	87.1	7.63097e+07
275-T	1	88	7.63097e+07
93-CGGGCAAGAAGTGTAACGGATACGTTAACTGTCTTGGTGGTGAGGATGAGTCGGGCTGTGGGATGGATCAGATGCTACGATCGATGTCGCAGCGAGGTGAGGAAGAAAGTGAGGA_327-A	1	64.5	7.63097e+07
204+AAAACT	1	96.7	7.63097e+07
20-CTG_45+CGAAAATGCATGGGGAACAGGGCAAA_53+CCATCAGCGC_75+TAGACCTGGAACACGGTGAAT_110+ATGCA_153+C_213+CCA_263-ACTAC_322+CGGCCCCCGGCTCATCA	1	42.2	7.63097e+07
20+C_57+ACAGGGCAAAAATGCCCGCCATCAGCGCGGCC_75+TAGACCTGGAACACGGTGAAT_110+ATGCA_153+C_213+CTA_263-ACTAC_322+CGGCCCACGGCTCATCA	1	41.5	7.63097e+07
152-GGGATGGATCAGATGCTACGATCGATGTCGCAGCGAGGTGAGGAAGAAAGTGAGGAGGA_324-T	1	80.7	7.63097e+07
20+GGAATCAGCCT_33+AGC_138+AATAAAGCTA	1	48.8	7.63097e+07
207+A_280+A_324-T	1	90.4	7.63097e+07
20-CTG_33+AGGATCGCCCCGCGAAAATGCATGGTGAACAGGGCAAAAATGCCCGCCAT_51+ATTCAG_66+C_110+ATGCA_153+C_202+CCA_263-ACTAC_322+CGGCCCCCGGCTCATCA	1	41.7	7.63097e+07
182-CAGCGAGGTGAGGAAGA	1	94	7.63097e+07
200-AGTGAGG_304+C	1	88	7.63097e+07
20-CTG_33+AGAATCGCCCCGCGAAAATGCATGGGGAACAGGGCAAAAATGCCCGCCAT_51+ATTCAG_66+C_115+TCACC_151+C_213+CCA_248-ACAAC_309+CAAA_320+GCCCCAGGATCAT	1	42.7	7.63097e+07
56-A_200+AGTGAGTAGGTGCTTTTTTTTACGCGTGGGTCACATGGGTGAGGTGGAGTACGCGCCCGGGGAGCCCAAAGGTTACCCCAGTTGGGGGGCACGCCCAACTTTGTATAGAAAAGTTGGGTG	1	65.5	7.63097e+07
133-T_174-CGATGTCGCAGCGAGGTGAGGAAGAAAGTGA	1	88.9	7.63097e+07
20-CTG_33+AGGATCGCCCCGCGAAAATGCATGGGGAACAGGGCAAAAATGCCCGCCAT_51+ATTCAG_66+C_110+ATGCA_153+C_213+CCA_263-AC_296+C_321+CCCCCGGCTCATC	1	42.5	7.63097e+07
200+AGTGAAAGTATCAACTTGAACAAGTGGCACCGATTCGGTGCttttttttAGGCGGGGGTCCCAGGTGTAAGGTGGAATACGCACCATGGGAGCTCAAAGGTTACCCCAGTTGGGGGGCGCGCCCAACTTTGTATAGAAAAGTTGGGTG	1	68.1	7.63097e+07
19-ACT_34-TGCGCGGGCT_75-GAGGGA_95-GGCAAGAA_162-AGATGCTA	1	46	7.63097e+07
7+G_21-TG_44+C	1	88	7.63097e+07
207+ATAAGAAAGTGATTTGTATAGAAGAGTTGGGAGAGAGAAA	1	88.7	7.63097e+07
46-CTGT_65-ATCTGGGG_105-GTAA_127+A	1	47.2	7.63097e+07
131-GGTGAGGATGAGTCGGGCTGTGGGATGGATCAGATGCTACGATCGATGTCGCAGCGAGGTGAGGAAGAAAGTGAGGA_329-G	1	75.6	7.63097e+07
208+TGATAG	1	97.6	7.63097e+07
184-GCGAGGTGAGGAAGAAAGTG	1	91.9	7.63097e+07
125-CTTGGTGGTGAGGATGAGTCGGGCTGTGGGATGGATCAGATGCTACGATCGATGTCGCAGCGAGGTGAGGAAGAAAGTGAGGAG	1	74.7	7.63097e+07
208+AGATAG	1	97.9	7.63097e+07
59-C	1	93.7	7.63097e+07
20-CTG_40+CCCCGCGAAAATGCAT_70+C_91+GTGTAG_115+GTCGC_135+TTTCA_148+GA_205+C_249+GGAGAAAACATCAGGTCGCTCATGT_322+CGGCCCCCGGCTCATCA	1	42.9	7.63097e+07
20-CTG_33+AGGATCGCCCCGCGAAAATGCATGGGGAACAGGGCAAAAATGCCCGCCAT_51+ATTCAG_66+C_110+ATGCA_156+C_213+CCA_263-ACTAC_322+CGGCCCCCGGCTCATCA	1	41.7	7.63097e+07
89-C_199-AAGTGAGG	1	96.1	7.63097e+07
240+GGATT_257-G_284+AACAGGAAGAA	1	43.6	7.63097e+07
206+AAAAAT	1	92.3	7.63097e+07
189-GTGAGGAAGAAA_327-A	1	93.7	7.63097e+07
94-G_203-GAGGA	1	97.3	7.63097e+07
201-GTGAGGAGGAGGGTGGTAGTGCCACACAGAGAGCTTCGGATGTGGATACAACG_271-ATTGTTCACATCGGAAGAAACGACG	1	73.2	7.63097e+07
271+TTAAG_310-G	1	50	7.63097e+07
203-GAG_268+GGCAACGAGGTGAGAAAAAATGGGGGAAGGGTGGTAGGCCCAAAAGAGAAGTTTGGAAGGTGAAAACAAGGAAAGTGAAAATTA	1	75.2	7.63097e+07
188-GGTGAGGAAGAAAGTGAG_222-C	1	93.1	7.63097e+07
10-A_127-TGGTGGTGAGGATGAGTCGGGCTGTGGGATGGATCAGATGCTACGATCGATGTCGCAGCGAGGTGAGGAAGAAAGTGAGGA	1	75.3	7.63097e+07
19+ACGTTGGCGGTGCTG_49-T_96+TCGGCGCCTCGA_115+GTCACCGGCCAGCG_257-GCTG_311+TC	1	41.3	7.63097e+07
206-GAGGA_282-C	1	89.2	7.63097e+07
207+TAGTGGATACTC	1	94.2	7.63097e+07
206+GAGCGTATAGAAAAAGTAAATGGTATAGAAGAGTTGGGAGAGAGAA	1	86.8	7.63097e+07
20-CTG_33+AGGATCGCCCCGCGAAAATGCATGGGGAACAGGGCAAAAATGCCCGCCAT_51+ATTCAG_66+C_110+ATGCA_153+C_213+CCA_263-ACTAC_322+CGGCCCCGGGTTCATCA	1	41.4	7.63097e+07
191-GAGGAA	1	95.2	7.63097e+07
208+TTGTTTAAAGATTGGAT	1	93.7	7.63097e+07
20-CTG_40+CCCCGCGAAAATGCAT_70+C_91+GTGTAG_115+GTCGC_135+TTTCATGC_172-A_227+CCGC_252+AACATCAGGTCGCTCATGTCGG_322+CGGCCCCGGCTCAGCA	1	42.7	7.63097e+07
131-GGTGAGGATGAGTCGGGCTGTGGGATGGATCAGATGCTACGATCGATGTCGCAGCGAGGTGAGGAAGAAAGTGAGGA_327-A	1	74.4	7.63097e+07
207+ACGCAC	1	97.3	7.63097e+07
203-GAGGA_322-T	1	97	7.63097e+07
226-A	1	97.3	7.63097e+07
205-GGAGG_326-G	1	92.2	7.63097e+07
20-CTG_33+AGGATCGCCCCGCGAAAATGCATGGGGAACAGGGCAAAAATGCCCGCCAT_51+ATTCAG_66+C_110+ATGCA_151+CGCGGCTCTACGTC_170+AG_248-AC_271+TAA_306-T	1	44.8	7.63097e+07
201+CAACTTTATAAT	1	86.6	7.63097e+07
20-CT_93+GTCTTAGAGTT	1	49.6	7.63097e+07
200+AGTGAGTCGGTGCttttttttACGCGTGGGTCCCATGGGTGAGGTGGAGTACGCGCCCGGGGAGCCGAAAGGTTACCCCAGTTGGGGGGAGCGCCCAACTTTGTATAGAAAAGTTGGGTG	1	73.5	7.63097e+07
207-AGGAGGGTGGTAGTGCCACACAGAGAGCTTCGGATGTGGATACA_327+A	1	85.9	7.63097e+07
207+A_310-G	1	88	7.63097e+07
20-CTG_33+AGGATCGCCCCGCGAAAATGCATGGGGAACAGGGCAAAAATGCCCGCCAT_51+ATTCAG_66+C_110+ATGCA_153+C_213+CCA_263-ACTAC_322+CGGCCCCCGGCTCAGCA	1	41.7	7.63097e+07
107-A_203-GAG	1	98.8	7.63097e+07
205+GGGTG	1	97.3	7.63097e+07
197-GAAAGTGAGG_326-G	1	94	7.63097e+07
20+C_57+ACAGGGCAAAAATGCCCGCCATCAGTGCGTCC_75+TAGACCTGGAACACGGTGAAT_110+ATGCA_155+GGTC_263-ACTAC_322+CGGCCCCAGGCTCATCA	1	40.3	7.63097e+07
20-CTG_40+CCCCGCGAAAATGCAT_80-AT_97-C_143-T_167+TGGCCCGTCCTTTTGAATCGC_185+CT_227+CCGC_252+AACATCAGGTCGCTCATGTCGG_322+CGGCCCCCGGCTCATCA	1	42.3	7.63097e+07
19+GTCAT_67+CCC	1	52.4	7.63097e+07
20-CTG_33+AGGATCGCCCCGCGAAAATGCATGGGGAACAGGGCAAAAATGCCCGCCAT_51+ATTCAG_66+C_110+ATGCA_153+C_210+CTGCCA_236-TCG_263-ACTAC_322+CGGCCCCCGGCTCATCA	1	42.1	7.63097e+07
266+A	1	88	7.63097e+07
189-GTGAGGAAGAAA_325-A	1	95.2	7.63097e+07
20-CTG_33+AGGATCGCCCCGCGAAAATGCATGGGGAACAGGGCAAAAATGCCCGCCAT_51+ATTCAG_66+C_110+ATGCA_153+C_213+CAA_263-AC_296+C_320+ACCCCCGGCTCAT	1	42.5	7.63097e+07
22+CG_54-GGA_75-GAGGGATCTGTC_104-T_130-T_180+ATAATC	1	44.4	7.63097e+07
206+GAGGGTCGTGAGGAAGAAAGA	1	92.6	7.63097e+07
10-A_195-AAGAAAGTGAGGAGGA	1	94	7.63097e+07
208+GTGTAAAGAAAGGAGGAAGAAAGT	1	91.9	7.63097e+07
318+A	1	86.4	7.63097e+07
203+GAATCGATGTCGCAGAGGAAGTAGTAAAACAATAGTAGTACCC	1	87.5	7.63097e+07
200+AGTGAGTGCttttttttACGCGTGGGTCCAATGGGTGAGGTGGAGTACGCGCCCGGGGAGATCAAAGGTTACCCCAGTTGGGTGGCGCGCTCAAATTTGTATAGAAAAGTTGTGTG	1	73.2	7.63097e+07
21-TGCCAGCACGTA_74-GGAGGGATCTGTC	1	49.1	7.63097e+07
197-GAAAGT_326-G	1	96.7	7.63097e+07
20-CTG_40+CCCCGCGAAAATGCAT_80-AT_97-C_143-T_167+TGGCCCGTCCC_185+GCTTGCGCGGCT_227+CCGC_252+AACATCAGGTCGCTCATGTCGG_322+CGGCCCCCGGCTCATCA	1	42.3	7.63097e+07
207+AAGAGTGTATCCGAACCAC	1	93.2	7.63097e+07
200-AGTGAGG_258-C	1	88	7.63097e+07
20-CTG_33+AGGATCGCCCCGCGAAAATGCATGGGGAACAGGGCAAAAATGCCCGCCAT_51+ATTCAG_66+C_110+ATGCA_155+GCTC_263-AC_296+C_320+GCCCCCGGCTCAT	1	41.7	7.63097e+07
18-CA_66+C_110+ATGCA_153+C_213+CCA_263-AC_296+C_320+GCCCCCAGCTCAT	1	44.9	7.63097e+07
207+AAGAAGGGTAACGAAGACATTA	1	93.8	7.63097e+07
201-GT_233-G	1	90.4	7.63097e+07
211-GGGT	1	87.7	7.63097e+07
20-CTG_40+CCCCGCGAAAATGCAT_75+CCAAGGAGTCATTCAGCGTGTAGACCGGGAACACGGTGAAT_110+ATGCA_153+C_213+CCA_263-ACTAC_309+CAAA_320+GCCCACGGATCAT	1	42.2	7.63097e+07
43+AT_125+TGCA_132+CTCC_177+GT	1	44.7	7.63097e+07
20+C_56+AAA_68+CCCCCATCA_91+CTGTTG_115+ATCCT_122+GAGGACAACTG_152-GGG_183-A_228+CGCCAAAAGGCTGCCAATTATGTT_240+GTCGCTC_263-AC_297+C_320+GCCCCCGGCTCAT	1	44.7	7.63097e+07
207+ACACAC	1	97.9	7.63097e+07
199-AAGTGAGG_310-G	1	88.3	7.63097e+07
200-AGTGAGG_322-T	1	90.4	7.63097e+07
200+AGTGAGGAGCGTATAGAAAAAGTATATTGTATAGAAAAGTGGGGTG	1	86.8	7.63097e+07
20-CTG_33+AGTATCGCCCCGCTAAAATGCATGGGGAACAGGGCAAAAATGCCCGCCAT_51+ATTCAG_66+C_110+ATGCA_153+C_213+CAA_263-ACTAC_322+CGGCCCCCGGCTCATCA	1	41.9	7.63097e+07
20-CTG_36+ATCGCCCCGCGAAAATGCATGGGGAACAGGGCAAAAATGCC_63+CAGCGTGTAGACCTGG_110+ATGCA_153+C_202+CCA_263-ACTAC_322+CGGCCCACGGATCATCA	1	41.2	7.63097e+07
194-GAAGAAAGTGAGGAGGA	1	94.9	7.63097e+07
20+CCAGGACGAAAGAATCGCCCCGCGAAAATGCATGGGGAACAGGGCAAAAATGC_66+C_110+ATGCA_153+C_202+CCA_263-ACTAC_309+CAAA_320+GCCCCAGGCTCAT	1	41.7	7.63097e+07
203+GGAAGAAAGGTTACCCCAGTTGGGGGGCGCGCCCAACTTTGTATAGAAAAGTTGTGTGAAA	1	82.7	7.63097e+07
287-G	1	96.4	7.63097e+07
206-GAGGA_329-G	1	97.3	7.63097e+07
201+GTGAGAAAACTTGAAAGGATGTGAAAGTGAAAGTGAACAAGTTTGTATAGAGAAGTGGGGTGG	1	82	7.63097e+07
82-C_203-GAG	1	95.8	7.63097e+07
17-CC_51-CGGGGATGCG_98-AAGAAGTGTAACGGATACGTTA_211-GGGTGG	1	44	7.63097e+07
20-CTG_45+CGAAAATGCATGGGGAACAGGGCAAA_53+CCATCAGCGC_75+TAGACCTGGAACACGGTGAAT_110+ATGCA_153+C_213+CCA_263-ACTAC_322+CGGCCCCCGGCTCAGCA	1	42.2	7.63097e+07
30+A_56+AACAGGGCAAAA_70+C_91+GTGTAG_115+GTCGC_135+TTTCATGC_172-A_226+TCCA_252+AACATCAGGTCGCTCATGTCGG_322+CGGCCCCCGGCTCATCA	1	42.4	7.63097e+07
196-AGAAAGTGAGGAGGAGGGTGGT_321-G	1	91.3	7.63097e+07
20+CCAGGACGAAATTATCGCCCCGCTAAAATGCATGGGGAACAGTGCAAAAATGC_66+C_110+ATGCA_158+CTAC_263+GAAATTAGCCAGA_306-T	1	40.4	7.63097e+07
150-GTGGGATGGATCAGATGCTACGATCGATGTCGCAGCGAGGTGAGGAAGAAAGTGAGG_322-T	1	81.3	7.63097e+07
20-CTG_33+AGGATCGCCCCGCGAAAATGCATGGGGAACAGGGCAAAAATGCCCGCCAT_51+ATTCAG_66+C_110+ATGCA_153+C_213+TCA_263-ACTAC_322+CGGCCCCCGGCTCATCA	1	41.7	7.63097e+07
246+A_306-T	1	88	7.63097e+07
22+A_56+AACAGGGCAAAA_70+C_91+GTGTAG_115+GTGGC_122+GAGGCGA_228+CACA_271+CGGTGGTCATGTAGCTCAGGCA_309+CAAA_320+GCCCCCAGCTCAT	1	44	7.63097e+07
223-CACACA	1	91.9	7.63097e+07
20-CTGCCAGCACGTACTGC_60-GATGT_87-T_146-GGC	1	42.2	7.63097e+07
255+AC_275-TTCACAT_294-CG	1	86.8	7.63097e+07
197-GAAAGTGAGGAGGAGGGTGGTAGT_322-T	1	85.2	7.63097e+07
203-GAGGA_255+A_321-G	1	89.2	7.63097e+07
201-GTGAGGAG_323-G	1	97.3	7.63097e+07
202-TGAGGA_258-C	1	89.8	7.63097e+07
18-CA_66+C_110+ATGCA_153+C_213+CCA_263-ACTAC_322+CTGCCCCCGGCTCATAA	1	44	7.63097e+07
30+A_57+ACAGGGCAAAAATGCCCGCCATCAGCGCGGCC_75+TAGACCTGGAACACGGTGAAT_110+ATGCA_153+C_213+CCA_282+AAACAGACCACG	1	40.8	7.63097e+07
20+G_48+G_104-TGT_134-GA_161+TTCGG_174+TTTGTTTTGC	1	46.6	7.63097e+07
203+GAGGATGCGAATAAAGTGAGGAGCGAGTGAGA	1	90.7	7.63097e+07
203-GAG_248+ACA	1	89	7.63097e+07
20-CTG_33+AGGATCGCCCCGCGAAAATGCATGGGGAATAGGGCAAAAATGCCCGCCAT_51+ATTCAG_66+C_110+ATGCA_153+C_213+CCA_263-ACTAC_322+CTGCCCCCGGCTCATCA	1	41.7	7.63097e+07
20-CTG_40+CCCCGCGAAAATGCAT_70+C_81-TCT_97-C_143-T_167+TGGCCCGTCCT_185+GGTTGCGCGGCT_227+CCGC_252+AACATCAGGTCGCTCAGGTCGG_322+CGGCCCCAGGCTCATCA	1	42.9	7.63097e+07
204+AA_244+tttACCCAC_269-GTATTG	1	74.1	7.63097e+07
200+AGTGAGTGCttttttttACGCGTGGGTCCCATGGGTGAGGTGGAGTACGCGCCCGGGGAGCCCAAAGGTGACCCCAGTTGGGGGGCGCGCCAAACTTTGTATAGAAAAGTTGGGTG	1	73	7.63097e+07
20-CTG_33+AGGATCGCCCCGCGAAAATGCATGGGGAACAGGGCAAAAATGCCCGCCAT_51+ATTCAG_66+C_110+ATGCA_153+C_213+CCA_263-AC_298+CATCGAGCCAAACA	1	41.7	7.63097e+07
205+AGG	1	96.1	7.63097e+07
20-CTG_33+AGAATCGCCCCGCGAAAATGCATGGGGAACAGGGCAAAAATGCCCGCCAT_51+ATTCAG_66+C_110-GG_124+TGGCCCGTACTTTTTAA_166+AACG_170-CG_181+A_221+CAG_240-ATGT_279+GACC	1	45.9	7.63097e+07
165-TGCTACGATCGATGTCGCAGCGAGGTGAGGAAGAAAGTGAGG	1	81.3	7.63097e+07
200+AGTGATAGTGAGGAGGGTG_326-G	1	94.3	7.63097e+07
258-C	1	96.4	7.63097e+07
20-CTG_40+CCCCGCGAAAATGCAT_80-AT_97-C_143-T_187+CAGGCGGCGGCTTGCGCGGCTCT_227+CCGC_252+AACATCAGGTCGCTCATGTCGG_322+CGGCCCCCGGCTCATCA	1	41.8	7.63097e+07
20+GTCCAGTTAGTATAC_63+AACG_138+ACAGGCGCGCCA_199+GTTG_264-CTACCGTATTG	1	43	7.63097e+07
190-TGAGGAAGAAAGTGA_327-A	1	88.9	7.63097e+07
204+CCACT	1	89.3	7.63097e+07
200-AGTG_327-A	1	94.3	7.63097e+07
20-CTG_33+AGGATCGCCCCGCGAAAATGCATGGGGAACAGGGCAAAAATGCCCGCCAT_51+ATTCAG_66+C_110+ATGCA_153+C_213+CCA_263-ACTAC_324+GCCCCCGGCTCATCAGA	1	41.7	7.63097e+07
34+G_48+G_104-TGT_129-GT_161+TTCGG_174+TTTGTTTTGC	1	47.1	7.63097e+07
179+GCCATCCTGTTGAATCGCAGGCGGAGGCTTGC_227+CCGC_243+ATGTGAAAAAACATAAGGTCGCTCATGTCGGTGGT_274+AAAC	1	40.8	7.63097e+07
164-ATGCTACGATCGATGTCGCAGCGAGGTGAGGAAGAAAGTGAGGAGGA_324-T	1	84.3	7.63097e+07
210-AGGGTGGTAGT	1	90.7	7.63097e+07
244+C	1	89.5	7.63097e+07
247+T_322-T	1	89.5	7.63097e+07
13-T_201-GTGAG	1	97	7.63097e+07
77-G_207+A	1	99.1	7.63097e+07
9-T_147-GCTGTGGGATGGATCAGATGCTACGATCGATGTCGCAGCGAGGTGAGGAAGAAAGTGAGGA	1	80.1	7.63097e+07
225+C_233-G	1	91.3	7.63097e+07
308-C	1	88.9	7.63097e+07
77-G_197-GAAAGTGAGG	1	95.2	7.63097e+07
18+CACACGA_35-G_69-GG_110-GGATACGTTA_151+CCCATGAA_214+CA_237+CTCCCCGGCTGGG_312+GTTCTTAC	1	43.3	7.63097e+07
207+AGGAGAGTATCCGAACGAA	1	93.4	7.63097e+07
197-GAAAGTGAGG_244-G_285-A	1	95.5	7.63097e+07
203+GATAGTGAGGAGGGTGAGA	1	94.3	7.63097e+07
203-GAGGAG_282-C_312+A	1	89.8	7.63097e+07
200+ACAACTTTATTATACAAAGTTGTGGCGCGCCCAACTTTGTATAGAAAAGTTGGGTG	1	84.5	7.63097e+07
311+A	1	88.6	7.63097e+07
207+GTGGGGGTGGAAGTGAGGAAGAAAGTGAGGGTGGGGGGAGGAATAAA	1	87.1	7.63097e+07
200+AGTGAAAGTATCAACTTGAAAAAGTGGCACCGAGTCGGTGCttttttttttACGCGTGGGTCCCATGGGTGAGGTGGAGTACGCGCCCGGGGAGCCCAAAGGTTACCCCAGTTGGGGGGCGCGCCCAACTTTGTATAGAAAAGTTGGGTG	1	68	7.63097e+07
13-T_206-GA	1	97.9	7.63097e+07
155-A	1	98.5	7.63097e+07
299-TTA	1	90.7	7.63097e+07
19+CCCAAAAGGATAGAA_52+ACCACTGG_70+CTCT_127-TGGTGGTGAGGA_152-GGGATG_208-GGAGGGTG_229-GAGAGCTTCGG_270-TA_307-GCCGGA	1	44	7.63097e+07
30+A_57+ACAGGGCAAAAATGCCCGCCATCAGCGCGGCC_75+TAGACCTGGAACACGGTGAAT_110+ATGCA_153+C_213+CCA_263-AC_296+C_320+GCCAGCGGCACAT	1	42.3	7.63097e+07
202+TGAAAA	1	92.9	7.63097e+07
209+GTGCCTACTCTC	1	94.8	7.63097e+07
20-CTG_33+AGGATCGCCCCGCGAAAATGCATGGGGAACAGGGCAAAAATGCCCGCCAT_51+ATTCAG_66+C_110+ATGCA_153+C_213+CCA_263-ACTAC_322+CGGCCCACGGCTAAACA	1	41.4	7.63097e+07
7-G_206-GA	1	97.3	7.63097e+07
311-GA	1	90.4	7.63097e+07
202-TGAGGA_282+C	1	88	7.63097e+07
201-GTGAGGAG_327-A	1	97.3	7.63097e+07
177+GGCCTGTCTTTTTAAACCACAGGCGGCGGCTTGCGCGGCACGTGGGCCGGCAGAAAATAACAGCTAAGGGCCGAC	1	48.4	7.63097e+07
10-A_175-GATGTCGCAGCGAGGTGAG_203-GAG	1	91.9	7.63097e+07
130-T_203-GAG	1	98.8	7.63097e+07
310+G_321-G	1	89.8	7.63097e+07
20-CTG_36+ATCGCCCCGCGAAAATGCATGGGGAACAGGGCAAAAATGCC_63+CAGCGTGTAGACCTGG_110+ATGCA_155+TGACTACGTCCGGCACCAAATA_203+AGAAAACATCAGGTC_256-AGCTGAG_293-ACGACGTTAAGCGT	1	40.4	7.63097e+07
35+A_48+G_108-ACG_134-GA_161+TTCGG_174+TTTGTTTTGC	1	47.5	7.63097e+07
203-GAGGAG_327+T	1	85.9	7.63097e+07
20-CTG_40+CCCCGCGAAAATGCAT_70+C_91+GTGTAG_115+GTCGC_135+TTTCATCC_172-A_233+AGAG_252+AACATCAGGTCGCTCATGTCGG_322+CGGCCCCCGGCTCATCA	1	42.8	7.63097e+07
200+ACAACTTTATTATATAAAATTGTGGCGCGCCCCCCAACTGAGGTAACCTTTAGGCTCACCGGGCGTGTACTCCACCTTACCCATGAGATCGCTACGGAAAGGTACCTAGATGAGTTTGGACAAACCGCAACGTAGGTG	1	69.6	7.63097e+07
250-AACGGA	1	86.1	7.63097e+07
20-CTG_40+CCCCGCGAAAATGCAT_70+C_81-TCT_97-C_143-T_167+TGGCCCGTCCT_185+GCTTGCGCGGCT_227+CCGC_252+AACATCAGGTCGCTCATGTCGG_322+CGGCCCCCGGCTCAGCA	1	43.1	7.63097e+07
20+CCAGGACGACAGGATCGCCCCGCGAAAATGCATGGGGAACAGGGCAAAAATGC_66+C_110+ATGCA_155+GAGCTAC_244+TCGTA_268+ACG	1	41.4	7.63097e+07
206+GAAAGA	1	97.9	7.63097e+07
20-CTG_33+AGGATCGCCCCGCGAAAATGCATGGGGAACAGGGCAAAAATGCCCGCCAT_51+ATTCAG_66+C_110+ATGCA_155+GCTCTAC_220-TGC_263-AC_296+C_320+GCCCCAGGCTCAT	1	42.9	7.63097e+07
208+AAGTGG_291-C	1	82	7.63097e+07
67+AAATGCCGGCCATCAGCGCGTCCAGGCAGTCATTCAGCGTGTAGACCTTGAACA_115+TCACC_128+TTAGAATAGCAGGC_170+AGAACCCAC_201-GTGAGG_322-T	1	43.7	7.63097e+07
200+ACAACTTTATTATACAAAGTTGTGGCGCGCCCCCCAACTGGAGTAACCTTTGGGATCCCCGGGCGCGTACTCCACCTCACCCATGCGATCGCTCCGGAAAGATACATTGATGAGTTTGGACAAACCACAACGTGGGTG	1	70.2	7.63097e+07
22+A_57+ACAGGGCAAAAATGCCCGCCATCAGCGCGGCC_75+TAGACCTGGAACACGGTGAAT_110+ATGCA_153+C_213+CCA_264-CT_298+CAACGAGCCAAACA	1	42.1	7.63097e+07
208-GGAGG_323-G	1	97	7.63097e+07
206+GATGATAAGAAAGTGAGGAACGGGTGAGAGAA	1	90.7	7.63097e+07
221-GCC	1	96.7	7.63097e+07
207+AAGCGAGGTGAGGAAGA	1	94.3	7.63097e+07
22+AGGACGAAAGGATCGCCCCGCGAAAATGCATGGGGAACAGGGCAAAAATGCCC_66+C_110+ATGCA_153+C_213+CAA_263-ACTAC_322+CGGCCCCCAGCTCAGCA	1	41.5	7.63097e+07
207+TAGTGCATACTC	1	93.9	7.63097e+07
181-GCAGCGAGGTGAGGAAGAAAGT	1	91.9	7.63097e+07
199-AAGTGAGG_258-C	1	89.5	7.63097e+07
20-CT_34+G_48+G_174+TTTGTTTTGC	1	45.7	7.63097e+07
195-AAGAAAGTGA	1	95.5	7.63097e+07
50-C_207+A	1	97.3	7.63097e+07
188-GGTGAG_208+T_323-G	1	95.5	7.63097e+07
68+AATGCCCGCCATCAG_90+GTGTA_113+GGGTC_135+TTTCATGC_172-A_233+AAAG_252+AACATCAGGTCGCTCATGTCGG_309+CAAA_320+GCCCCAGGCTCAT	1	43.4	7.63097e+07
20-CTG_36+ATCGCCCCGCGAAAATGCATGGGGAACAGGGCAAAAATGCC_60+ATTCAG_66+GACCTGGAAC_110+ATGCA_153+C_213+CCA_263-ACTAC_322+CGGCCCCCGGCTCATCA	1	41.7	7.63097e+07
201+CAACTTTATTATACAAAGTTGTGGCGCGCCCG	1	87.6	7.63097e+07
20+C_56+AACAGGGCAAAA_80-AT_97-C_143-T_167+TGGCCCGTCCT_185+GCTTGCGCGGCT_227+CCGC_271+CGGTTGTCGGGTAGCTCAGGAA_322+CGGCCCCCGGCTCATCA	1	43.1	7.63097e+07
197-GAAAGTGAGG_329-G	1	96.1	7.63097e+07
260+TGACACATAAGTAGAAA_265+ATACAAAAGGACAGAGTTT_320+T	1	79.1	7.63097e+07
10-A_88-ACCACCGGGCAAGAAGTGTAACGGATACGTTAACTGTCTTGGTGGTGAGGATGAGTCGGGCTGTGGGATGGATCAGATGCTACGATCGATGTCGCAGCGAGGTGAGGAAGAAAGTGAGGAG	1	62	7.63097e+07
199-AAGTGAGG_258-C_312+a	1	88	7.63097e+07
244+AGCTACAAATGA	1	91	7.63097e+07
20-CTG_40+CCCCGCGAAAATGCAT_70+C_81-TCT_97-C_143-T_167+TGGCCCGTCCT_185+GCTTGCGCGGCT_227+CCGC_252+AACATCAGGTCGCTCATGTCGG_322+CGGCCCCAGGCTCATCA	1	43.4	7.63097e+07
19+CCCAAAAGGATAGAA_38+ACCTCAAC_70+CTCT_127-TGGTGGTGAGGA_152-GGGATG_208-GGAGGGTG_229-GAGAGCTTCGG_270-TA_311-GAAGAA	1	43.5	7.63097e+07
208+TACGTAAACACTGTAG	1	95.4	7.63097e+07
52-G_186-GAGGTGAGGAAGAAAGT	1	94.6	7.63097e+07
181-GCAGCGAGGTGA	1	92.2	7.63097e+07
20-CTG_40+CCCCGCGAAAATGCAT_80-AT_97-C_143-T_187+CAGGCGGCGGCTTGCGCGGCTCT_227+CCGC_252+AACATCAGGTCGCTCATGTCGG_322+CGGCCCCAGGCTCATCA	1	42.3	7.63097e+07
10-AA	1	98.2	7.63097e+07
20-CTG_33+AGAATCGCCCCGCGAAAATGCATGGGGAACAGTGCAAAAATGCCCGCCAT_50+CATTCAGCGTGTAGA_67-CTGGGGTG_110+ATGCA_155+GCTC_263-AC_296+C_320+GCCCCCGGCTCAT	1	41.7	7.63097e+07
20-CTG_40+CCCCGCGAAAATGCAT_80-AT_97-C_143-T_167+TGGCCCGTCCT_238+TCCG_260+A_288+TCGTGTAGCTCAGGAAACTAGCCAGCACGCTTA_322+CGGCCCCCGGCTCATCA	1	41.8	7.63097e+07
199-AAGTGAGGAG_288+A	1	86.1	7.63097e+07
20-CTG_33+AGGATCGCCCCGCGAAAATGCATGGGGAACAGGGCAAAAATGCCCGCCAT_51+ATTCAG_66+C_110+ATGCA_153+C_213+CCA_263-ACTAC_322+CGGCCCCGGGCTCATCA	1	41.9	7.63097e+07
208+GAGGAGAGGAAGACAG	1	93.7	7.63097e+07
209+T	1	98.8	7.63097e+07
40+CCCCGCGAAAATGCAT_80-AT_97-C_143-T_187+CAGGCGGCGGCTTGCTCGTGTCT_226+TCCG_252+AAAATCAGGTCGCTCATGTCGG_322+CGGCCCCCGGCTCATCA	1	42	7.63097e+07
197-GAAAGTGAGG_325-A	1	95.2	7.63097e+07
305-G	1	90.7	7.63097e+07
201+CAACTTTATAACACAAAG_207+CGCGCCCCACAACA	1	89	7.63097e+07
22-GCCAGCA_58+GCAGCGC	1	76.7	7.63097e+07
162-AGATGCTACGATCGATGTCGCAGCGAGGTGAGGAAGAAAGTGAGGAG	1	83.4	7.63097e+07
22+A_56+AACAGGGCAAAA_70+C_81-TCT_97-C_143-T_167+TGGCCCATCCT_185+GCTTGCGCGGCT_227+CCGC_243+ATATTAAAAAACATCAGGTCGCTCATGTCGGTGGT_281+CCAC	1	43.7	7.63097e+07
193-GGAAGAAAGT_238-G	1	91.2	7.63097e+07
13-T_200-AGTGAGG	1	96.4	7.63097e+07
188-GGTGAG_208+T_327+A	1	95.5	7.63097e+07
203+GATGTAGACTGAACGAGATGTATAGAAAAGTTGGGAGAGA	1	87.6	7.63097e+07
199-AAGTGAGG_256+AG	1	92.5	7.63097e+07
206+GAGGGTGGTAGTGGCACACAGAGAGCTTCGGATGTGGATACGACGGAAGCTGAGACTACGGCAGCGAGGTGAGGAAGAAGGT	1	79.2	7.63097e+07
193-G_203-GAGGAG	1	97.9	7.63097e+07
110-G_199-AAGTGAGG	1	96.4	7.63097e+07
203-GAG_253-G	1	88.6	7.63097e+07
20-CTG_45+CGAAAATGCATGGGGAACAGGGCAAA_53+CCATCAGCGC_75+TAGACCTGGAACACGGTGAAT_110+ATGCA_153+C_213+CCA_263-AC_296+C_320+GCCCCAGGCTCAT	1	43	7.63097e+07
204+GTGGTGGAGTGGAAGGTTACCACAGTGGAAGGTTACCCAAGTTGGAGAGCGCGCGCAACTTTGTATAGAAAAGTTAGGAGGGTA	1	78.6	7.63097e+07
51-CGGGG_65-A_73+CCTTC	1	47.4	7.63097e+07
161-CAGATGCTACGATCGATGTCGCAGCGAGGTGAGGAAGAAAGTGAGG	1	82.5	7.63097e+07
252+G	1	90.1	7.63097e+07
56-A_83+T	1	94.6	7.63097e+07
136-GG_163+GATTAC_181+AGCGCCACCA_187+GTGGC_223+A_254-GAA_278+GTCCAGCA_300+GCCCGACCGGCTGA	1	49.8	7.63097e+07
140-GAGTCGGGCTGTGGGATGGATCAGATGCTACGATCGATGTCGCAGCGAGGTGAGGAAGAAAGTGAGG_325-A	1	78.3	7.63097e+07
20-CTG_45+CGCAAATGCATGGGGAACAGGGCAAA_53+CCATCAGCGC_75+TAGACCTGGAACACGGTGAAT_110+ATGCA_153+C_213+CCA_263-ACTAC_322+CGGCCCCCGGCTCATCA	1	42.4	7.63097e+07
107+GTAGACCTGGAACACGGTGAATAAG_122+GAGGCGGGCAGTGTTTCATGCATCACCCGTGGCCTGTGCTTTTGAATTACAGGCGG_197-GAAAGT	1	42.9	7.63097e+07
207+ATAGGC	1	98.2	7.63097e+07
207+AAAATC	1	97	7.63097e+07
34+G_48+G_89+G_104+AGATTGCACATTTAAT_165+TT_170-CGATCG	1	47.1	7.63097e+07
166-GCTACGATCGATGTCGCAGCGAGGTGAGGAAGAAAGTGAGGA_256+AGCTGAAACTACAGCTTTGTTCACATCGAAAACGAC	1	71.5	7.63097e+07
145-G_203-GAGGAG	1	92.5	7.63097e+07
33+AGGATCGCCCCGCGAAAATGCATGGGGAACAGGGCAAAAATGCCCGCCAT_51+ATTCAG_66+C_110+ATGCA_153+C_213+CCA_263-ACTAC_322+CGGCCCCCGGCTCATCA	1	42.4	7.63097e+07
22+A_57+ACAGGGCAAAAATGCCCGCCATCAGCGCGGCC_75+TCGACCTGGAACACGGTGAAT_110+ATGCA_156+CTCT_260-GA_296+C_320+GCCCCCGGCACAT	1	41.3	7.63097e+07
207+GAAGAC	1	97	7.63097e+07
189-GTGAGGAAGAAAGTGAGGAGGAGGGTGGTAGTGCCACACAGAGAGCTTCGGATGTGGATACAACGGAAGC	1	75.9	7.63097e+07
295-G	1	98.5	7.63097e+07
207+ATGATC	1	96.7	7.63097e+07
206+AGAAA	1	95.8	7.63097e+07
45-ACTGTCCGGGGATGCGATGTAT_193-GG_224+GCTG_259-TGAGA_292+A	1	43	7.63097e+07
200+ACAACTTTATTATACAAAGTTGTGGCGCGCCC	1	73.9	7.63097e+07
34+G_48+G_125+GGCA_134+CCTTTGTAC	1	43.3	7.63097e+07
87-T	1	96.7	7.63097e+07
157-GGATCAGATGCTACGATCGATGTCGCAGCGAGGTGAGGAAGAAAGTGAG	1	84	7.63097e+07
201-GTGAGGAGGAG_323-G	1	93.4	7.63097e+07
206-GA_285-A	1	98.2	7.63097e+07
202-TGAGGA_250+AGATAA	1	91.1	7.63097e+07
20-CTG_33+ATTATCGCCCCGCGAAAATGCATGGGGAACAGGGCAAAAATGCCCGCCAT_51+ATTCAG_66+C_110+ATGCA_153+C_213+CAA_263-AC_296+C_320+GCCCCAGGATCAT	1	42.5	7.63097e+07
34+G_48+G_120+GTGTTGGCTCTTGTT_138-AT_182+CGCCTTA	1	44.3	7.63097e+07
310+A	1	89.8	7.63097e+07
20-CTG_33+AGGATCGCCCCGCGAAAATGCATGGGGAACAGGGCAAAAATGCCCGCCAT_51+ATTCAG_66+C_110+ATGCA_155+GCTCTACGTCCGGCACCAAATA_203+AGAAAACATCAGGTC_256-AGCTGAG_293-ACGACGTTAAGCGT	1	42.2	7.63097e+07
20-CTG_33+AGGATCGCCCCGCGAAAATGCATGGGGAACAGGGCAAAAATGCCCGCCAT_51+ATTCAG_66+C_110+ATGCA_153+C_213+CCA_263-AC_296+C_320+GCCCACGGCTCAT	1	43	7.63097e+07
209+GTACCGACTACAAGAAGAAAGT	1	93.2	7.63097e+07
18+CCGCCAT_67+Aaggggggggccg_205-GGAGGAGGGTGG_264-CTACC_322+CGGCCCCAGGCACATCA	1	42.8	7.63097e+07
203+GATAGTGAGGAGGGAGGAA	1	94.3	7.63097e+07
208+GCGTATAGAAAAAGTATATTGTATAGAAAAGTTGGGAGAGAGAGGG	1	86.5	7.63097e+07
206+GAGGGTGGTTGTGCCACACAGAGAGCTTCGGATGAGGATACGACGGAAGCTGAGACTACGGCAGCGAGGAGAGGAAGAATGT	1	79.5	7.63097e+07
29+TAGC_81-TCTGTCT_125-CTTGGTGGTGAGGATGA_153-GGAT_224-ACACA_245+ATA_270+GCGGAACGGCAAAC_311-GAAGAA	1	43.1	7.63097e+07
304+CAGGACGAAGGGGAGAAAGAAGGAGAAGCGGTGTAGTAAAA	1	80.7	7.63097e+07
205+TATTG	1	97.3	7.63097e+07
260+G_303-G	1	91.6	7.63097e+07
20-CTG_36+ATCGCCCCGCGAAAATGCATGGGGAACAGGGCAAAAATGCC_63+CAGCGTGTAGACCTGG_110+ATGCA_151+CGCGGCTCTACGTC_170+AG_248+C_306-T	1	42.8	7.63097e+07
199-AAGTGAGG_319-GA	1	95.2	7.63097e+07
200+AGTGAGGGCCAATGGGTGAGGTGGAGTACGCGCCCGGGGAGGTCAAAGGTTACCGAAGTTGGGGGGCGCGCCCAAGTTTGTATAGAAAAGTAGGGTG	1	76.7	7.63097e+07
9-T_204-AGGA	1	97	7.63097e+07
20-CTG_40+CCCCGCGAAAATGCAT_70+C_81-TCT_97-C_143-T_167+TGGCCCGTCCT_185+GCTTGCGCGGCT_226+GCCA_252+AACATCAGGTCGCTCATGTAGG_322+CGGCCCCAGGCACATCA	1	43.4	7.63097e+07
22-GCCAGCACGTA_55-GA_104-T_130-T_186+AGCAACTTATCTGGTT_254+CCTGTAA_275+CCA_297-CGTTAAGCGT	1	44.1	7.63097e+07
20+C_57+ACAGGGCAAAACTGCCCGCCATCAGCGCGGCC_75+TAGACCTGGAACACGGTGAAT_110+ATGCA_153+C_213+CCA_263-ACTAC_322+CGGCCCCGGCTCATCA	1	41.5	7.63097e+07
19+A_51+GATTA_89-C_131-GGTGA_175+TTCCTCTTTGA_199+TTCATCCCCTCCTCT	1	40.9	7.63097e+07
43+AT_91-ACCGGGCAA_136-G_166-GCTACG_203-G	1	45.4	7.63097e+07
250+G	1	91.9	7.63097e+07
204+AA_232-AGCT_275+GGTGGC_305+AT	1	75.4	7.63097e+07
20-CTG_45+CGAAAATGCATGGGGA_80-AT_97-C_143-T_167+TGGCCCGTCCT_233+GCCCATCCGCCAAAAG_252+AACATCAGGTCGCTCATGTCGG_322+CTGCCCCCGGCTCATCA	1	41.5	7.63097e+07
189-GTGAGGAAGAAA_326-G	1	95.2	7.63097e+07
19-ACTGCCA_58+CTTTA_126-TTG_172+GGCGT_205-GG_260-GAGACTA_302+CTGGGGAT_317+CACATCC	1	43.4	7.63097e+07
105-G	1	98.5	7.63097e+07
187-AGGTGAGGAAGAAAGTGAGGA	1	92.5	7.63097e+07
208+TGGTAG_327-A	1	97.9	7.63097e+07
19+A_61+TCTTT_89-C_131-GGTGA_175+TGCCTCTTTGA_199+TTCATCCCCTCCTCT	1	40.9	7.63097e+07
198-AAAGTGAGGA_325-A	1	95.5	7.63097e+07
57+ACAGGGCAAAAATGCCCGCCATCAGCGCGGCC_75+TAGACCTGGAACACGGTGAAT_110+ATGCA_153+C_213+CCA_263-ACTAC_322+CGGCCCCCGGCTCATCA	1	41.1	7.63097e+07
209+GTACCCCCTACCACCACAAAGT	1	84.7	7.63097e+07
234-C_318+C	1	86.4	7.63097e+07
162-AGATGCTACGATCGATGTCGCAGCGAGGTGAGGAAGAAAGTGAGG_324-T	1	78.3	7.63097e+07
143-TCGGGCTGTGGGATGGATCAGATGCTACGATCGATGTCGCAGCGAGGTGAGGAAGAAAGTGAGGA_324-T	1	73.2	7.63097e+07
212-GGTGGT	1	91	7.63097e+07
200-AGTGAGG_258-C_328+G	1	89.8	7.63097e+07
199-AAGTGAGG_234-C	1	95.8	7.63097e+07
34+G_48+G_125+GGCA_135+CTTTGTACA_171-GAT	1	46	7.63097e+07
203+CGAGGCGTGGAGGCGATCGCAACAA	1	90.5	7.63097e+07
200+AGTGAGAGTATCAACTTGAAAGAGTGGCACCGAGTCGGTGCttttttttAAGCGTGGGGCCCATGGGAGATGTGGAGTACGCGACCGGGGAGCCCAAAGGTGACCGCAGCAGGTGGGAGCGTCCAAGTCTGTATAGAAAAGTTGGGTG	1	68.5	7.63097e+07
263-A_301+A	1	93.1	7.63097e+07
19+CGCGA_31+AGTCGTTCAAGCATAA_78-GGATCT_122-T_142+TCGTACTCCATCACGCG_157+CGG_181+A_227+TCTTG_238+CCCGGGGCAGAAGA_257+TGTACAT_271-A_295+GA_310-GGAAG	1	45.8	7.63097e+07
35+C_56+AACAGGGCAAAA_70+C_81-TCT_97-C_124-TCT_149+AG_167+TGGCCCGTCCT_185+GCTTGCGCGGCT_226+TCCG_252+AACATCAGGTCGCTCAGGTCGG_322+CTGCCCCCGGCTCATCA	1	44.2	7.63097e+07
206+GGAA	1	96.1	7.63097e+07
203+AGAGGAGGGAG_263-A	1	83.7	7.63097e+07
39-G_197-GAAAGTGAGG	1	96.7	7.63097e+07
202-TGAGGA_284+A_308-C	1	87.7	7.63097e+07
204-A_322-T	1	95.5	7.63097e+07
13-T_181-GCAGCGAGGTGAGGAAGAAAGTGAG	1	91.3	7.63097e+07
207+GGT	1	98.8	7.63097e+07
200-AGTGAGG_325-AG	1	84.9	7.63097e+07
35+CGCCCCGCGAAAATGCATGGGGAACAGGGCAAAAATGC_63+CAGCGTGTAGACCTGG_110+ATGCA_155+GCTGTACGTC_170+GCTAAG_236-TC_284+CC	1	42.5	7.63097e+07
20-CTG_33+AGGATCGCCCCGCGAAAATGCATGGGGAACAGGGCAAAAATGCCCGCCAT_51+ATTCAG_66+C_110+ATGCA_153+C_213+CAA_263-ACTAC_322+CGGCCCACGGCTCATCA	1	41.7	7.63097e+07
98-A_152-GGGATGGATCAGATGCTACGATCGATGTCGCAGCGAGGTGAGGAAGAAAGTGAGGA	1	81.6	7.63097e+07
200+ACAACTTTATTATACAAAGTTGTGGCGCGCCCAAGTTTGTATAGAAAAGTTGGGGG	1	84	7.63097e+07
76-A_202-TGAGGA	1	88.3	7.63097e+07
200+AGTGAGGAGGGTACAGCAAAAGCATCTTCTACAGAGAAGGGAGGGG	1	86.8	7.63097e+07
208+GTGTAAAGAAAGGAGGAAGAAAAT	1	91.9	7.63097e+07
199+AAGTGGAAGAAAGGTTACCCCAGTTGGGGGGCGCGCCAAACTTTGTATAGAAAAGTTAGAT	1	81.6	7.63097e+07
207+GAAGGC	1	90.8	7.63097e+07
20+C_57+ACAGGGCAAAAATGCCCGCCATCAGCGCGGCC_75+TAGACCTGGAACACGGTGAAT_110+ATGCA_153+C_194+CCCCTC_236-TCG_263-ACTAC_322+CGGCCGCAGGCTCATCA	1	41.2	7.63097e+07
69-G_197-GAAAGTGAGG	1	95.5	7.63097e+07
198-AAAGTGAGGA_322-T	1	90.1	7.63097e+07
19-ACT_40+CCCCGCGAAAATGCAT_80-AT_97-C_143-T_167+TGGCCCGTCCT_185+GCTTGCGCGGCT_226+TCCG_252+AACATCAGGTCGCTCATATCGG_322+CGGCCCCCGGCTCATCA	1	42	7.63097e+07
20-CTG_33+AGGATCGCCCCGCGAAAATGCATGGGGAACAGGGCAAAAATGCCCGCCAT_51+ATTCAG_66+C_110+ATGCA_153+C_213+CCA_263-ACTAC_322+CAGCCCCCGGCTCATCA	1	41.7	7.63097e+07
20-CTG_33+AGGATCGCCCCGCGAAAATGCATGGGGAACAGGGCAAAAATGCCCGCCAT_51+ATTCAG_66+C_110+ATGCA_153+C_213+CCA_260-GAGAC_322+CGGCCCCCGGCTCATCA	1	41.4	7.63097e+07
24+A_51+AAT_60+CGTCTTCTG_202-TGAGGA	1	69.9	7.63097e+07
21-TGCCAGCACGTA_66-TCTGGGGTGGAGG	1	47.3	7.63097e+07
77-G_166-GCTACGATCGATGTCGCAGCGAGGTGAGGAAGAAAGTGAGGA	1	86.1	7.63097e+07
209+GTACCGACTACCGGAACAAAGT	1	92.9	7.63097e+07
73-T_323-G	1	96.1	7.63097e+07
200+AGTGAGGTCCCATGGGTGAGGTGGAGTACGCGCCCGGGGAGCTCAAAGGTTACCCCAGTTGGGGGGCGCGCCAAAATTTGTATAGAAAAGTTGGGTG	1	76.5	7.63097e+07
180-CGCAGCGAGGTGAGGAAGAAAGTGAGGA	1	90.6	7.63097e+07
20+CCAGGACGAAAGAATCGCCCCGCTAAAATGCATGGGGAACAGGGCAAAAATGC_66+C_110+ATGCA_155+GCTCTACGTC_170+GCTAAG_205-GGAGGAGGGTGG_263-ACTAC_310+AAAT_320+GCCCCAGGCTCAT	1	41.5	7.63097e+07
208+GGGCATT	1	96.5	7.63097e+07
197-GAAAGTGAGGAGGAGG	1	81.6	7.63097e+07
10-A_190-TGAGGAAGAAAGTGAGGA	1	93.4	7.63097e+07
252-C_314-G	1	91.9	7.63097e+07
19+CCCAAAAGGATAGCA_38+ACCTCAAC_70+CCCT_127-TGGTGGTGAGGA_152-GGGATG_187-AGGTGA_205-GG_229-GAGAGCTTCGG_270-TA_311-GAAGAA	1	43.7	7.63097e+07
298+G	1	94.9	7.63097e+07
204+AATGTTTGAAGAAGATGAAGATGAA_312+A	1	82.1	7.63097e+07
179+CCCATCCGTTTGAA_185+GCGGCGGCTTGCGCGGGA_198+CAAATAACAGCTAAGAGCCGACAGCCGCTCCGCC_219+AAAAACATC	1	41.8	7.63097e+07
34+G_48+G_91-ACCGGGCAA_177+AGCGTGGATTTTGTTTTGCTCT	1	43.6	7.63097e+07
88-A	1	97.9	7.63097e+07
161-CAGATGCTACGATCGATGTCGCAGCGAGGTGAGGAAGAAAGTG	1	84.3	7.63097e+07
207+GTGGGGGGTGGTAGTGAGGAAGAAAGTGAGGGTGGGGGGTGGTATCTA	1	87.1	7.63097e+07
20-CTG_40+CCCCGCGAAAATGCAT_80-AT_97-C_143-T_167+TGGCCCGTCCT_185+GCTTGCGCGGCT_227+CCGC_252+AACATCAGGTCGCTCATATCGG_322+CTGCCCCCGGCTCATCA	1	42	7.63097e+07
202+AGAGTGCttttttttCAGTGTGAGTCCAATGGGTGCGGTAGTGTACGCGCTCGTGAGGCAGAAAGGGGACGGGAGATGGGGGGGACGCCACTATCGATGTAGAAAAGATGGGAGGA	1	73.2	7.63097e+07
195+GTGGGTGATAGTGCCACAC	1	82.1	7.63097e+07
56+GAACAGGGCAAAA_70+C_81+GTCATTCAG_91+TGGAACACGGTGAATAAGAGAGTCGCCGTTA_110+ATGCA_155+GGTCTACGTCCGGCAGCAAATA_211-GGGTGG	1	43.6	7.63097e+07
207+A_325-A	1	98.8	7.63097e+07
20-CT_32-A_45+CATCA_120+GTGTTGGCACTTGTT_139-TG_171-GAT	1	47.3	7.63097e+07
241-TG	1	92.2	7.63097e+07
202-TGAGGA_267-CCG_291+ACG	1	86.3	7.63097e+07
152-G_202-TGAGGA	1	97.9	7.63097e+07
20-CTG_33+AGGATCGCCCCGCGAAAATGCATGGGGAACAGGGCAAAAATGCCCGCCAT_51+ATTCAG_104+GTGTTT_153+C_213+CCA_263-ACTAC_322+CGGCCCCCGGCTCATCA	1	41	7.63097e+07
20-CTG_33+AGGATCGCCCCGCGAAAATGCATGGGGAACAGGGCAAAAATGCCCGCCAT_51+ATTCAG_66+C_110+ATGCA_155+GCTCTAC_220-TGC_263-ACTAC_322+CGGCCCCCGGATCAGCA	1	41.1	7.63097e+07
209+TAGGGAGACAAA	1	94.5	7.63097e+07
194-GAAGAAAGTGAGGA_324-T	1	95.5	7.63097e+07
201-GTGAGG_257+G	1	87.7	7.63097e+07
200+AGTGGTGGTGGAGTGGAAGGTTACCCCAGTGGAAGGTTACCGCAGTTGGGGGGCGCGCCGATCTTGGTATAGAAAAGTTGGGTG	1	78.8	7.63097e+07
131-GGTGAGGATGAGTCGGGCTGTGGGATGGATCAGATGCTACGATCGATGTCGCAGCGA	1	81.9	7.63097e+07
322+A	1	89.5	7.63097e+07
140-GAGTCGGGCTGTGGGATGGATCAGATGCTACGATCGATGTCGCAGCGAGGTGAGGAAGAAAGTGAGG_324-T	1	75.9	7.63097e+07
200+AGTGAGGTCCCATGGGTGAGGTGGAGTACGCGCCCGGGGAGCCCAAAGGTTGCCCCAGTTGGGGGGCGCGCCCAACTTTGTATAGAAAAGTTGGGTG	1	76.5	7.63097e+07
20-CTG_40+CCCCGCGAAAATGCAT_70+C_91+GTGTAG_115+GGCGC_135+TTTCATGC_201+TAACAGCTAAGCGCCTACAGCCCATGCGGC_263-AC_296+C_320+GCCCGCGGCTGAT	1	42.5	7.63097e+07
197-GAAAGTGAG_329-G	1	97	7.63097e+07
206+CCACTGCCAGT	1	85.7	7.63097e+07
208+GAGTGAAG	1	96.2	7.63097e+07
205-G_241-TGTGGATACAAC	1	88.6	7.63097e+07
19-A	1	99.7	7.63097e+07
322+T	1	98.8	7.63097e+07
202-TGAGGA_267-C	1	88.6	7.63097e+07
64+CAAAAATGCCCGCCATCAGCGCGGCCAAGGAGTCATTCAGCGTGTAGACCTGGT_110+ATGCA_153+C_202+CCA_263-ACTAC_309+CAAA_319+GGCCCCAGGCTCA	1	41.7	7.63097e+07
205+G_321-G	1	88.9	7.63097e+07
203-GAGGAG_250+AAAGGA	1	91.1	7.63097e+07
20-CTG_40+CCCCGCGAAAATGCAT_80-AT_97-C_143-T_167+TGGCCGGTCCT_185+GCTTGCGCGGCT_223+CCAT_252+AACATCAGGTCGCTCATGTCGG_322+CGGCCCCAGGCTCATCA	1	42.3	7.63097e+07
20-CTG_33+AGGATCGCCCCGCGAAAATGCATGGGGAACAGGGCAAAAATGCCCGCCAT_51+ATTCAG_66+C_110+ATGCA_153+C_213+CCA_263-ACTAC_322+CGGCCCCCGGCGCATCA	1	41.7	7.63097e+07
207+AAGAGCGTGCTC	1	94.5	7.63097e+07
200-AGTGAGG_329-G	1	92.8	7.63097e+07
200+AGTGAGGATCCGAAGAAAGAGAGGATCGGGAG	1	90.4	7.63097e+07
200+AGTGAGGAGGGTATAGAAAAAGTATATTGTATAGAAAAGTTGGGTG	1	86.8	7.63097e+07
203-GAGGAG_282-CG_313+G	1	88.3	7.63097e+07
20-CTGCCAGC_60+CCCCG_101+GCCCTTT_136-G_147+TTT_183-AGCGA_255-AAGC_300+CTTTTAACG_320-A	1	44.9	7.63097e+07
248-ACAACG	1	86.4	7.63097e+07
207+AGGAGTTTAGCCGAACCAC	1	91.7	7.63097e+07
203-G_281-T_320-A	1	94.6	7.63097e+07
20+C_57+ACAGGGCAAAAATGCCCGCCATCAGCGCGGCC_75+TAGACCTGGAACACGGTGAAT_110+ATGCA_153+C_213+CCA_263-ACTAC_322+CGGCCCCAGGATCATCA	1	41.5	7.63097e+07
208+TGGTGG	1	98.2	7.63097e+07
157-GGATCAGATGCTACGATCGATGTCGCAGCGAGGTGAGGAAGAAAGTGA_329-G	1	83.1	7.63097e+07
203-GAG_222-C	1	97	7.63097e+07
10-A_35-GC	1	97.3	7.63097e+07
269+T	1	90.7	7.63097e+07
20-CTG_40+CCCCGCGAAAATGCAT_70+C_91+GTGTAG_115+GTCGC_135+TTTCATGC_184-G_227+CCGC_252+AACATCAGGTCGCTCATGTCGG_322+CGGCCCCCGGCTCATCA	1	43.1	7.63097e+07
180-CGCAGCGAGGTGAGGAAGAAAGTGAGG_327-A	1	91	7.63097e+07
202-TGAGGA_318-C	1	87	7.63097e+07
201-GTGAG_322-T	1	93.4	7.63097e+07
56+GAACAGGGCAAAA_75+CCAGGGAGTCATTCAGCGTGTAGACCTGGAACACGGTGAAT_110+ATGCA_153+C_197+CACCGC_236-TCG_263-ACTAC_322+CGGCCCCCGGCTCATCA	1	41.9	7.63097e+07
263-A_280+A_323-G	1	96.4	7.63097e+07
271-A_286+G	1	85.9	7.63097e+07
50+TGGGGC_64+GC_70+CGCCAGC_85+CGGA_115-C_146-GGC_164-ATGCTACGATCGATGTC	1	47.4	7.63097e+07
188-GGTGAG_207+A	1	96.1	7.63097e+07
22-GCCAGCACGTAC_73-TGGAGGGATCTGT	1	48.2	7.63097e+07
186-GAGGTG	1	93.7	7.63097e+07
28+TG_54+CGTGTCGTAC_141+T_176+TGCGA	1	47.8	7.63097e+07
262+G_301-A_315+A_326-G	1	89.8	7.63097e+07
177-TGTCGCAGCGAGGTG_199-AAGTGAG_283+G_321-G	1	82	7.63097e+07
193-G	1	98.5	7.63097e+07
208+CAGTAATACTCTCC	1	95.7	7.63097e+07
20+C_56+AACAGGGCAAAA_80-AT_97-C_143-T_167+TGGCCCGTCCT_185+GCTTGCGCGGCT_233+CAAG_252+AACATCAGGTCGCTCATGTCGG_322+CGGCCCCAGGCTCATCA	1	43.6	7.63097e+07
133-T_186-GAGGTGAGGAAGAAAGT	1	92.8	7.63097e+07
145-GGGCTGTGGGATGGATCAGATGCTACGATCGATGTCGCAGCGAGGTGAGGAAGAAAGTG	1	79.8	7.63097e+07
200+AGTGAGGTCACATGGGTGAGGTGGAGTACGCGCCCGGGGAGCCCAAAGGTTGACCCAGTTGGGGGGCGCGCCCAACTTTGTATAGAAAAGTTGGGTG	1	76.5	7.63097e+07
203+GAGCAAGCTTGAACGTCTTTGAAAGTGAAAGTGAACAATTTGGTATAGAAAAGTTGTGTGGGA	1	83	7.63097e+07
207+GGA	1	97.6	7.63097e+07
209+GAGTGTATGAGAACCACAC	1	92.3	7.63097e+07
196-AGAAAGTGAGGAGGAGGGTGGT_324-T	1	84.9	7.63097e+07
20-CTG_33+AGGATCGCCCCGCGAAAATGCATGGGGAACAGGGCAAAAATGCCCGCCAT_51+ATTCAG_71+T_110+ATGCA_153+C_213+CCA_263-ACTAC_322+CGGCCCCCGGCTCATCA	1	41.9	7.63097e+07
21+CAGGACGAAAGAA_70+C_91+GTGTAG_115+GTCGC_135+TTTCATGC_172-A_227+CCGC_252+AACATCAGGTCGCTCATGTCGG_322+CGGCCCCAGGCTGATCA	1	42.4	7.63097e+07
136-GG_163+GATTAC_181+AGCGCCACCA_187+GTGGC_223+A_259-TGA_278+GTCCAGCA_300+GCCCGACCGGCTGA	1	50.2	7.63097e+07
193-GGAAGAAAGTGAG_326-G	1	94.3	7.63097e+07
24-CAGCACGTACTGCGCGGGCTGACTG_95+T_160-TCAGATG_191+TCGTTGTTA_237+ACACACCA_295+AGT	1	43.3	7.63097e+07
265-T	1	90.7	7.63097e+07
203+ATC	1	96.7	7.63097e+07
205+GGTGTGAAGAAAGTGAAAG	1	94	7.63097e+07
205-GG_325-A	1	97.9	7.63097e+07
206+GGCGAGGAGGGTGTAGCAACGAGGC	1	92.4	7.63097e+07
22+A_56+TAC_67+GCCCGCCATCAGTGCGGCCAGGGAGTCATTCAGCGTGTAGACCTGGAACA_110+ATGCA_151+CGCGGCTCTACGTA_172+CACCGAC_235-TTCG_322-T	1	42.5	7.63097e+07
34+G_49+GTA_77-GG_114-AC_153+TACGTAATAGATTTCGGTGTAT_174-CGA	1	45.5	7.63097e+07
20+C_56+AACAGGGCAAAA_80-AT_97-C_137-GAT_153+TTTCATGCATCACCCGT_179+CGGCTTGC_228+CGCCAAAAGGCTGCCAATGATGTT_240+GTCGCTC_263-AC_296+C_320+GCCCCCGGCTCAT	1	44.1	7.63097e+07
214+AGATT	1	73.9	7.63097e+07
202-TGAGGA_324-TA	1	97.6	7.63097e+07
20-CTG_36+ATCGCCCCGCGAAAATGCATGGGGAACAGGGCAAAAATGCC_63+CAGCGTGTAGACCTGG_106+TTTCATGCATCAGCC_204+CGGAAA	1	49.3	7.63097e+07
200+AGTGAACAAAATTGAAAGGCTTTGAAAGTGAAAGTGAACAACTTTGTATAGAAAAGTTGGGTG	1	83	7.63097e+07
76-A_207-A	1	99.1	7.63097e+07
9-T_197-GAAAGT_323-G	1	96.4	7.63097e+07
208+TAGATGT	1	97.1	7.63097e+07
200+AGTGAAAGTATCAACTTGAAAAAGTGGCACCGAGTCGGTGCttttttttACGCGTAGGTCCCATGGGTGAGGTGGAGTACGCGCCCGGGGAGCCCAAAGGTTACCCCAGTTGGGGGGCGCGCCCAACTTTGTATAGAAAAGTTGGGTG	1	68.1	7.63097e+07
20-CTG_40+CCCCGCGAAAATGCAT_80-AT_97-C_143-T_167+TGGCCCGTCCT_185+GCTTGCGCGGGT_226+TCCG_252+AACATCAGGTCGCTCATGTCGG_322+CTGCCCCCGGCTCAGCA	1	42.8	7.63097e+07
206+GAGGA	1	97	7.63097e+07
202-TGAGGA_231-G	1	89.8	7.63097e+07
200-AGTGAGGAGGAG	1	94	7.63097e+07
34+G_56-A_106+A_125+TGACA_134+CCTTTGCAC_174-CGA	1	47.8	7.63097e+07
193-GGAAGAAAGTG	1	93.1	7.63097e+07
19+ACGTTGGCGGTGCTG_49-T_98+GGCGCCTCGATCGCCAG_130+CCACCT_235+CA_257-GCTG_276+CCC_298+CCGA_309-CGGAA	1	43.5	7.63097e+07
199-AAGTGAGG_271-A	1	96.7	7.63097e+07
206+CCACTGCCAGC_326-G	1	85.1	7.63097e+07
216-GT	1	97.6	7.63097e+07
7-G_69-G	1	98.5	7.63097e+07
45-ACTGTCCGGGGATGCGATGTAT_193-GG_208-GGAGGGTGGTAGTGCCAC_254-GAAGC_307-G	1	41.9	7.63097e+07
26+C_57+ACAGGGCAAAAATGCCCGCCATCAGCGCGGCC_75+TAGACCTGGAACACGGTGAAT_110+ATGCA_153+C_213+CCA_263-ACTAC_322+CGGCCCCCGGCTCATCA	1	41	7.63097e+07
40+TCATTC_67-CTGGGGTG_110+ATGCA_153+C_213+CCA_263-ACTAC_322+CGGCCCCAGGCTCATCA	1	43.7	7.63097e+07
10-A_326-G	1	97.9	7.63097e+07
69-G_194-GAAGAAAGTGAGGA	1	93.1	7.63097e+07
20-CTG_33+AGGATCGCCCCGCGAAAATGCATGGGGAACAGGGCAAAAATGCCCGCCAT_51+ATTCAG_66+C_110+ATGCA_155+GGTCTAC_220-TGC_260-GAGAC_322+CGGCCCCCGGCTCATCA	1	41.1	7.63097e+07
209+TAGTGACACACA	1	95.1	7.63097e+07
10-A_186-GAGGTGAGGAAGAAAGTGAG	1	92.8	7.63097e+07
21-TGCCAGCACGT_47-T_102-AGTGTAACG_246-A_314+C	1	42.6	7.63097e+07
20+C_57+ACAGGGCAAAAATGCCCGCCATCAGCGCGGCC_75+TAGACCTGGAACACGGTGAAT_110+ATGCA_153+C_213+CCA_263-ACTAC_322+CGGCCCCAGGCTCATCA	1	41.5	7.63097e+07
20-CTG_45+CGAAAATGCATGGGGAACAGGGCAAA_53+CCATCAGTGC_75+TAGAACTGGAACACGGTGAAT_110+ATGCA_153+C_213+CCA_260-GA_296+C_320+GCCCCCAGCTCAT	1	42.5	7.63097e+07
207+AAGATA	1	97.9	7.63097e+07
197-GAAAGTGAG_316-AG	1	85.8	7.63097e+07
20-CTG_33+AGGATCGCCCCGCGAAAATGCATGGGGAACAGGGCAAAAATGCCCGCCAT_51+ATTCAG_66+C_110+ATGCA_153+C_194+CCCCACC_202-T_220-TGC_263-ACTAC_322+CGGCCCCCGGCTCATCA	1	42.7	7.63097e+07
30+TTT_43+ATTT_124-TC_152-G_187+CATCGGTCA_240+TGCA_302-AGC	1	46.3	7.63097e+07
249-CAACGG_324-T	1	89.5	7.63097e+07
203+GAGGAGCGTATAGAAAAAGCATATTGTATAGAAAAGTGGGGTGCGA	1	87	7.63097e+07
208+TTGTTTATCGATTGGAT	1	93.4	7.63097e+07
20-CTG_40+CCCCGCGAAAATGCAT_80-AT_97-C_143-T_167+TGGCCCGTCCT_185+GCTTGCGCGGCT_227+CCGC_252+AACATCAGGTCGCTCATGTCGG_322+CGGCCCCCAGCTCATCA	1	42.5	7.63097e+07
190-TGAGGAAGAAAGTGA_321-G	1	87.3	7.63097e+07
200+AGTGAAAGTATCAACTTGAAAAAGTGGCACCGAGTCGGTGCttttttttACGCGTGGGTGCCATGGGTGAGGTGGAGTACGCGCCCGGGGAGCCCAAAGGTGACCCCAGTTGGGGGGCGCGCCCAACTTTGTATAGAAAAGTTGGGTG	1	68.1	7.63097e+07
66-TC	1	99.4	7.63097e+07
201+CAACTGAAGAAT	1	89.8	7.63097e+07
212-GGT_324-T	1	84.6	7.63097e+07
205+GGAGG	1	97	7.63097e+07
190-TGAGGAAGAAAGT	1	92.8	7.63097e+07
24-CAGCACGTACTGCGCGGGCT_59-CGA_85-TCTACCACC_164-A	1	45.3	7.63097e+07
9+T	1	98.2	7.63097e+07
20-CTG_33+AGGATCGCCCCGCGAAAAGGCATGGGGAACAGGGCAAAAATGCCCGCCAT_50+CATTCAGCGTGTAGA_72+AGTCGCCGTTAAC_86+TTCATG_211-GGGTGG	1	41.3	7.63097e+07
20-CTGCCAGCACGTACTGC_60-GATGT_100+AGCAAACAGC_111+CGAA_166-GC	1	43.5	7.63097e+07
30+A_56+AACAGGGCAAAA_70+C_81-TCT_97-C_143-T_167+TGGCCCGTCCT_185+GCTTGCGCGGCA_227+CCGC_252+AACATCAGGTCGCTCATGTCGG_322+CGGCCCCCGGCTCATCA	1	43.2	7.63097e+07
202+TACAGGTGGTA_320-A	1	94.5	7.63097e+07
20-CTG_33+AGGATCGCCCCGCGAAAATGCATGGGGAACAGGGCAAAAATGCCCGCCAT_51+ATTCAG_66+C_110+ATGCA_155+GGTCTACGTCCGGCAGCAAATA_211-GGGTGG_248-ACAA_294+GCC_306+C	1	41.2	7.63097e+07
20-CTGCCAGCACGTACTGCGCGGGC_102-AGTGTAACGGAT_122-TGTCTTGGTGGT_169-ACGATC_217+CGCC_268+GGAGATCA_279+GCGAT_292-G	1	43.8	7.63097e+07
196-AGAAAGTGAGG_329-G	1	96.1	7.63097e+07
175-GATGTCGCAGCGAGGTGAGGAAGAAAGTGAGG	1	90.1	7.63097e+07
201+GTGAGGTTACCCCAGTTGGGGGGCGCGCCCAACTTTGTATAGAAAAGTTGGGTGT	1	84.8	7.63097e+07
207+AAAATA	1	98.2	7.63097e+07
58-GCGATGTATCTGGGGTGGAGGGATCTGTCTACCACCGGGCAAGAAGTGTAACGGATACGTTAACTGTCTTGGTGGTGAGGATGAGTCGGGCTGTGGGATGGATCAGATGCTACGATCGATGTCGCAGCGAGGTGAGGAAGAAAGTGAGGAGGAG	1	53.6	7.63097e+07
203-GAGG_326-G	1	94.6	7.63097e+07
205+AGAAGAAAG	1	90.6	7.63097e+07
207+AAAGTA_322-T	1	95.6	7.63097e+07
208+AGAAAG_327-A	1	92.9	7.63097e+07
50-CCGGGG_76+CC_98+TTG_127+C_217+A_232-AGC_264+AGTGCGCGCCAG_315-AAGC	1	46.7	7.63097e+07
199-AAGTGAGG_326-G	1	96.1	7.63097e+07
19-ACTGCCA_58+CTTTA_126-TT_142-G_172+GGCGT_215-GG_260-GAGACTA_302+CTGGGGAT_321+TCCTGCT	1	44.3	7.63097e+07
175-GATGTCGCAGCGAGGTGAGGAAGAAAGTGAG_301-A_327-A	1	87.3	7.63097e+07
212-GGTGGT_252+AG_319-GA	1	87.7	7.63097e+07
126-TTGGTGGTGAGGATGAGTCGGGCTGTGGGATGGATCAGATGCTACGATCGATGTCGCAGCGAGGTGAGGAAGAAAGTGAGG_329-G	1	75.3	7.63097e+07
10-A_266-ACCG_298+CCATCTA_313-AG	1	84.1	7.63097e+07
52-G_207+A	1	97.9	7.63097e+07
206+AAAGCAAGT_325-A	1	87.1	7.63097e+07
201+CAACTTTATTATACAAAGTT_209+CCCCCCAACTGGGGTAACCTTTGGACTACA_223+ACTGCGTA	1	82.1	7.63097e+07
20-CTG_33+AGGATCGCCCCGCGAAAATGCATGGGGAACAGGGCATAAATGCCCGCCAT_51+ATTCAG_66+C_115+TCACC_153+C_213+CCA_263-ACTAC_322+CGGCCCCCGGCTCATCA	1	41.4	7.63097e+07
206+GAAGAA	1	96.2	7.63097e+07
67+AAATGCCCGCCATCAGCGCGGACAAGGAGTCATTCAGCGTGTAGACCTGGAACA_110+ATGCATCACCCGTGGCCGATCCTTTTG_193-G_218-AGTGC	1	44.1	7.63097e+07
209+AAAGGGGGGTA	1	94.8	7.63097e+07
183-AGCGAG	1	95.8	7.63097e+07
174-C	1	98.5	7.63097e+07
20+C_57+ACAGGGCAAAAG_70+C_81-TCT_97-C_134-GAG_154+TT_167+GGGCCCGTCCTTTTGAATCGC_185+CT_226+TCCG_252+AACATCAGGTCGCTCATGTCGG_322+CGGCCCCCGGCTCATCA	1	44.7	7.63097e+07
203+GAGGAGTGAGA	1	96.8	7.63097e+07
30+A_56+AACAGGGCAAAA_70+C_81-TCT_97-C_143-T_167+TGGCCCGTCCT_185+GCTTGCGCGTCT_227+CCGC_252+AACATCAGGCCGCTCAGGTCGG_322+GGGCCGCAGGCACATCA	1	43.2	7.63097e+07
33+ATCGCCCCGCGAAAATGCATGGGGAACAGGGCAAAAATGCCCGCCAT_51+ATTCAG_66+C_110+ATGCA_153+C_210+CTGCCA_236+AATG_244+A_279+GAC_319+A	1	43.8	7.63097e+07
17+CCACCCGCGACGAT_39+CAGAA_81-TCT_186+GGCG_201-GTGAGG_235+G_276-TCA	1	45.5	7.63097e+07
280+A	1	91.9	7.63097e+07
200+AGTGAAAGTATCAACTTGAAAAAGTGGCACAGAGTCGGTGCttttttttACGCGTGGGGCCCATGGGTGAGGTGGAGTACGCGCCCGGGGAGCCCAAAGGTTACCCCAGTTGGGGGGCGCGCCCAACTTTGTATAGAAAAGTTAGGTG	1	68.1	7.63097e+07
74-G_207-A	1	97.9	7.63097e+07
30+A_57+ACAGGGCAAAAGTGCCCGCCATCAGCGCGGCC_75+TAGACCTGGAACACGGTGAAT_110+ATGCA_155+GCTCTAC_235+ACAT_244+C_294+G_323+CAG	1	42.3	7.63097e+07
188-GGTGAG_208+T_321-GT	1	95.2	7.63097e+07
195-AAGAAAGTGAGGAGGAGGGTGGTA_323-G	1	90.4	7.63097e+07
208+AGAAAT	1	96.7	7.63097e+07
200+AGTGATAGGGAGGAGGGTG_326-G	1	94	7.63097e+07
200+AGTGAGTGCtttttttttACGCGTGGGTCCCATGGGTGAGGTGGAGTACGCGCCCGGGGAGCCCAAAGGTTACCCCAGTTGGGGGGCGCGCCCAACTTTGTATAGAAAAGTTGGGAG	1	72.8	7.63097e+07
13-T_189-GTGAGGAAGAAAGTGAGGA	1	92.8	7.63097e+07
226-ACAG_325-A	1	97.6	7.63097e+07
31-T	1	72	7.63097e+07
75-GAGGGATCTGTCTACCACCGGGCAAGAAGTGTAACGGATACGTTAACTGTCTTGGTGGTGAGGATGAGTCGGGCTGTGGGATGGATCAGATGCTACGATCGATGTCGCAGCGAGGTGAGGAAGAAAGT_323-G	1	59.3	7.63097e+07
206+GAGGGTGGTAGTGCCACACAGAGAGCTTCGGATGTGGATACGACGGAAGCTGAGACTACGGCAGCGAGGTGAGGAAGAAAGT	1	79.5	7.63097e+07
208-GG_327-A	1	97	7.63097e+07
220-TGCCAC	1	85.8	7.63097e+07
13+T	1	97.9	7.63097e+07
148-C	1	98.2	7.63097e+07
200+AGTGATGTCTACTGAAAGTGATGTATAGAAAAGTTGGGGG	1	87.9	7.63097e+07
176-ATGTCGC_200-AGT_232-AGC_272+CCGCGAAAAGG_312-AAGA	1	47.2	7.63097e+07
74-GGAGGGATCTGTCTACCACCGGGCAAGAAGTGTAACGGATACGTTAACTGTCTTGGTGGTGAGGATGAGTCGGGCTGTGGGATGGATCAGATGCTACGATCGATGTCGCAGCGAGGTGAGGAAGAAAG	1	59.3	7.63097e+07
200+AGTGAGTGCttttttttACGCGTGGGTCCCATGGGTGAGGTGGAGTACGCGCCCGGGGAGCCCAAAGGTTACCCCAGTTGGGGGGCGCGCCCAACTGTGTATAGAAAAGTTGGGTG	1	73	7.63097e+07
199-AAGTGAGGAG_324+T	1	94.6	7.63097e+07
20-C_59-CGAT_88-ACCACCGGGCAA_133-TGAGGAT_160+C_178+G_237+ACCCACCA_295+AGT	1	46.1	7.63097e+07
106-T	1	98.5	7.63097e+07
326+G	1	98.2	7.63097e+07
20-CTG_33+AGGATCGCCCCGCGAAAATGCATGGGGAACAGGGCAAAAATGCCCGCCAT_51+ATTCAG_66+C_110+ATGCA_155+GCTC_263-ACTAC_322+CGGCCCCCAGCTCATCA	1	41.2	7.63097e+07
20+C_56+AACAGGGCAAAA_70+C_81-TCT_97-C_143-T_163+CCCGT_185+GCGGGGGCTTGCGCGGCT_203+AACAGCTAAGCGCCGACAGCGCCACGGCCAA_267+TTAGCCAGCACG	1	42.5	7.63097e+07
20-CTG_33+ATCATCGCCCCGCGAAAATGCATGGGGTACAGGGCATATATGCCCGCCAT_51+ATTCAG_66+C_110+ATGCA_155+GATCTACATC_166+AACAGCTACAC_208-GGAGGG_321+C	1	43.9	7.63097e+07
292+A	1	89.2	7.63097e+07
166-GCTACGATCGATGTCGCAGCGAGGTGAGGAAGAAAGTGAGGA_266+AAGGTTTTGTTCACAACGGAAGAAACGCGGAGACG	1	75.7	7.63097e+07
208+AGATGG	1	96.7	7.63097e+07
69+ATA_91+ATGGAATTGCTCTCTTCTGGAAGAAAATGAGGAGGGGTTTTAGAGCTAG_101+TTAAAATAAGGCTCGTCCGTTATCAACTTGACA_128+tACGCGTGGGTGCCATG_160+AGGTTCCG_164+TTGGGGGGC_194-GAAGAA	1	61.9	7.63097e+07
19+GCTTGACCT_89+T_111-GATACGTTAA_155+TCCCT_201+ACCATTTT_228+CGTA_255-AAGCTGAGA_307+CG	1	41.8	7.63097e+07
22+A_57+ACAGGGCAAAAATGCCCGCCGTCAGCGCGGCC_79+CCTGGAACACGGTGAATAAGA_110+ATGCA_155+TCTC_263-AC_296+C_319+GGCCCCCGGATCA	1	41.6	7.63097e+07
14-G_207-A	1	97.9	7.63097e+07
22-GCC_40+ACCCGCGAAAATGCAT_80-AT_97-C_143-T_187+CAGGCGGCGGCTTGCGCGGCTCT_226+TCCG_252+AACATCAGGTCGCTCATGTCGG_322+CGGCCCCCGGCTCATCA	1	41.3	7.63097e+07
10-A_200+AGTGAGGAAGTGAGTGTATAGAAAAGTTGGGTG	1	88.2	7.63097e+07
22-GCCAG	1	55.6	7.63097e+07
10-A_203-GAGG	1	97	7.63097e+07
209+TAGTGCCACACA_319-GA	1	93.9	7.63097e+07
203+GGTGGTGGAGTGGAAGGTTACCAAAGTGAAAGGTTACCCCAGTTGGGGCGCGCGCCCAGATTGGTATAGAAAAGATGGGAGAGA	1	78.8	7.63097e+07
34+G_48+G_89+G_110+ATTTCATTAGTGT_155-A_174-CGA	1	47.8	7.63097e+07
9-TA	1	97.9	7.63097e+07
316-AG	1	90.7	7.63097e+07
186-GAGGTGAGG	1	88	7.63097e+07
20-CTG_40+CCCCGCGAAAATGCAT_80-AT_97-C_143-T_167+TGGCCCGTCCT_185+GCTTGCGCGGCT_227+CCGC_252+AACATCAGGTCGCTCATGTCGG_322+CGGCCCCAGGTTCATCA	1	42.3	7.63097e+07
20-CTG_40+CCCCGCGAAAATGCAT_80-AT_97-C_143-T_167+TGGCCCGTCCT_185+GCTTGCGCGGCT_226+TCCG_252+AACATCAGGTCGCACATGTCGG_322+CGGCCCCCGGCTCATCA	1	42	7.63097e+07
94-G_196-AGAAAGTGAGG	1	95.2	7.63097e+07
82-C	1	97.6	7.63097e+07
294-C	1	88.6	7.63097e+07
34+G_48+G_120-ACT_134-GA_161+TTCGG_174+TTTGTTTTGC	1	47.5	7.63097e+07
203+CGAGGCGAGGAGGGTGTAGCAACGA	1	91.3	7.63097e+07
74+GACAATC	1	49	7.63097e+07
203+GATAGTGAGGAGGTGGGGA	1	88.3	7.63097e+07
20-CTG_40+CCCCGCGAAAATGCAT_80-AT_97-C_143-T_167+TGGCCCGTCCT_185+GCTTGCGCGGCT_227+CCGC_271+CGGTGGTCGGGTAGCTCAGGAA_322+CGGCCCCCAGCTCATCA	1	42.8	7.63097e+07
240+GGATT_257-G_279+TACTG_290+GGCTAC	1	45.4	7.63097e+07
205+TAGCCGGGTTT_225+GGCTCAATCTC_249-C_274+GGAGATGGC_292+CG_306+C_319+ACTGGACT	1	44.4	7.63097e+07
20-CTG_45+CGAAAATGCATGGGGAACAGGGCAAA_53+CCATCAGCGC_75+TAGACCTGAAACACGGTGAAT_110+ATGCA_153+C_213+CCA_263-ACTAC_322+CGGCCCCCGGCTCATCA	1	41.7	7.63097e+07
208+GGTACGATCAAAGAGGTACGG	1	92.1	7.63097e+07
20-CTG_33+AGGATCGCCCCGCGAAAATGCATGGGGAACAGGGCAAAAATGCCCGCCAT_50+CATTCAGCGTGTAGA_67-CTGGGGTG_110+ATGCA_153+C_213+CCA_263-ACTAC_322+CGGCCCCCGGCTCATCA	1	41.1	7.63097e+07
207+GAAGGA	1	96.2	7.63097e+07
207+AGTCGC_325-AG	1	78.4	7.63097e+07
203-GAG_258-C_312+A	1	91	7.63097e+07
20-CTG_33+AGAATCGCCCCGCGAAAATGCATGGGGAACAGGGCAAAAATGCCCGCCAT_51+ATTCAG_66+C_110+ATGCA_155+GCTGTACGTC_170+GTTAAG	1	42.2	7.63097e+07
20-CTG_45+CGAAAATGCATGGGGAACAGGGCAAA_53+CCATCAGCGC_75+TAGACCTGGAACACGGTGAAT_110+ATGCA_153+C_202+CCA_263-ACTAC_322+CGGCCCCAAGATCATCA	1	41.9	7.63097e+07
20-CTG_33+AGGATCGCCCCGCGAAATGCATGGGGAACAGGGCAATAATGCCCGCCAT_51+ATTCAG_95+A_110+ATGCA_151+CGCGGCTCTACGTC_170+AG	1	40.6	7.63097e+07
244-GGATAC	1	89.2	7.63097e+07
30+A_56+AACAGGGCAAAA_70+C_91+GTGTAG_115+GTCGC_135+TTTCATGC_172-A_227+CCGC_252+AACATCAGGTCGCTCATGTCGG_322+CGGCCCCCAGCTCATCA	1	43.1	7.63097e+07
203+GAATCGATGTCGCAGAGGAGGTAGTAAAACAATAGTATTTCCC	1	87.2	7.63097e+07
192-AGGAAGAA	1	96.4	7.63097e+07
27+GATA_81-TCTGTCT_125+GTCCCACTTTGGCA_144-CG_208-GGAGGGTG_229-GAGAGCTTCGG_270-TA_311-GAAGAA	1	43.4	7.63097e+07
204+AAGT	1	97	7.63097e+07
200+AGTGGTGGTGGAGTGGAAGGTTACCCCAGTGGAAGGTTACCCCAGTTGGGGGGCGCGGCCAAGGTTGTATAGAAAAGTTGGGTG	1	79.1	7.63097e+07
252-CGGAAGCTGAGACTACCGTATTGTTCACATC_293-ACGACGTTA	1	42.5	7.63097e+07
202-TGAGGA_255+A_325+G	1	88.3	7.63097e+07
202+TGAGTCGGGGCttttttttACTCGTGGGTTGGGTGGATGGGGTGGAGTACCAGCGGGGAAAAAGCGAAGGTGACACGAGAAGGGGGGCGCGGGCGACTATGTATAGAAAAGTTGGATGGA	1	71.5	7.63097e+07
74-G_203-GAGGA	1	98.2	7.63097e+07
20-CTG_45+CGAAAATGCATGGGGAACAGGGCAAA_53+CCATCA_66+GTCATTCAGCGTGTAGACCTGGAAC_110+ATGCA_153+C_213+CCA_263+GAAAATAGCCATC_306-T	1	42.1	7.63097e+07
186-GAGGTGAGGAAG	1	93.7	7.63097e+07
20-CTG_40+CCCCGCGAAAATGCAT_80-AT_97-C_143-T_167+TGGCCCGTCCT_185+GCTTGCGCGGCT_227+CCAC_252+AACATCAGGTCGCTCATGTCGG_322+CGCCGCCCGGCTCATCA	1	42.3	7.63097e+07
224-A	1	97.3	7.63097e+07
238+G_319-G	1	87.7	7.63097e+07
13-T_205-G	1	97.9	7.63097e+07
205+GGAGAAAG	1	96.8	7.63097e+07
20-CTG_33+AGGATCGCCCCGCGAAAATGCATGGGGAACAGGGCAAAAATGCCCGCCAT_51+ATTCAG_66+C_110+ATGCA_153+A_213+CCA_263-ACTAC_322+CGGCCCCCGGCTCATCA	1	41.7	7.63097e+07
74-GGAGGGATC_106+C_134-GAGGATGAG	1	44.6	7.63097e+07
22-GCCAGCA_50-CCGG	1	59	7.63097e+07
27-C	1	99.7	7.63097e+07
9-T_203-GAGGAG	1	97.3	7.63097e+07
202-TGAGGA_292-G	1	85.5	7.63097e+07
125+GAATAAG_153+TTTCATGCATCACCCGTGGCCCGTCC_172-A_203+AACAGCTAAGCGCCGACAACCCCTCCGCCAA_263-ACTAC_321+CCGGCCCCCGGCTCATC	1	40.7	7.63097e+07
203+A	1	98.5	7.63097e+07
36-C_127+AA_138+CCATGTACGTGACAT_150+C_188+TTC_225+GTTTC_251-ACG_300-TAAGCG	1	46.1	7.63097e+07
18-CA_66+C_110+ATGCA_153+C_213+CCA_263-ACTAC_322+CGGCCCCAGGCTCATCA	1	43.7	7.63097e+07
20-CTG_45+CGAAAATGCATGGGGAACAGGGCAAA_53+CCATCAGCGC_75+TAGACCTGGAACACGGTGAAT_110+ATGCA_153+C_202+CCA_263-ACTAC_322+CGGCCCCCGGCTCATCA	1	42.9	7.63097e+07
20-CTG_40+CCCCGCGAAAATGCAT_80-AT_97-C_143-T_167+TGGCCCGTCCT_185+GCTTGCGCGGCT_228+CGCA_252+AAAATCAGGTCGCTCATGTCGG_309+AAAA_320+ACCCCGGGCTCAT	1	44	7.63097e+07
202-TGAGGA_323-GTA	1	92.2	7.63097e+07
174-CGATGTCGCAG_194-GAAGAAAGTGA	1	91.6	7.63097e+07
218-AGTG	1	94.9	7.63097e+07
202+TGAGTGCttttttttACGCGTGGGTCCCATGGGTGAGGTGGAGTACGCGCCCGGGGAGCCCAAAGGTTACCCCAGTTGGGGGGCGCGCCCAACTTTGTATAGAAAAGTTGGGTGAA	1	73	7.63097e+07
200+ACAACTTTATTATATAAAGTTTTGGCACGCCCCCCAACTGAGGTAACCGTAGAGGTCCCCTGTCTCGTTCGCCACCTCAACCATGCGTTCGCTCCGGAAAGGTTCATTGATGAGTTGGGACAAACCGCAGCGGAGGTG	1	70	7.63097e+07
200-AGTGAGG_320-A	1	97.6	7.63097e+07
208+AAGTCG	1	97.9	7.63097e+07
197-GAAAGTG	1	94.3	7.63097e+07
208+TACGTAAACTATGTGT	1	95.1	7.63097e+07
133-T_193-GGAAGAAAGTGAGG	1	93.4	7.63097e+07
207-A_317-GC	1	97.6	7.63097e+07
209+TATGGGTGGTA	1	95.3	7.63097e+07
221-G	1	98.2	7.63097e+07
200+AGTGAGGTCCCATGGGTGAGGTGGAGTACGCGCCCGGGGAGCCCAAAGGTTACCCCAGGTGGGGGGTGCGCCCAAGTTTGTATAGAAAAGTTGGGTG	1	76.2	7.63097e+07
202-TGAGGA_310-G	1	90.7	7.63097e+07
194-GAAGAAAGTGAGGA_325-A	1	95.5	7.63097e+07
205+GGGTGAG	1	96.5	7.63097e+07
206+TATACGCAGAAAGTAAGGATCGTGTGAATAAC	1	68.4	7.63097e+07
43-TG_51-CG_70+CTCT_127-TGGTGGTGAGGA_152-GGGATG_208-GGAGGGTG_229-GAGAGCTTCGG_270-TA_311-GAAGAA	1	44.6	7.63097e+07
20-CTG_33+AGGATCGCCCCGCGAAAATGCATGGGGAACAGGGCAAAAATGCCCGCCAT_51+ATTCAG_66+C_110+ATGCA_153+C_209+ACT_263-AC_296+C_321+CCCCCGGCTCATC	1	42.5	7.63097e+07
20-CTG_36+ATCGCCCCGCGAAAATGCATGGGGAACAGGGCAAAAATGCC_63+CAGCGTGTAGACCTGG_110+ATGCA_155+GCACTAC_236-TCG_263-ACTAC_309+CAAA_320+GCCCCAGGATCAT	1	41.6	7.63097e+07
138+ACGATTA_153+TT_162+CCCCGTGGACCGTCCTTTTGAATAGCAGGCGGCGGGTTGCGCGGCTTTACGTCCGGTAGCAAATAACAG_188-GGT	1	45.9	7.63097e+07
35+C_57+ACAGGGCAAAAG_70+C_91+GTGTAG_115+GTCGC_135+TTTCA_148+GC_203+AACAGCTAAGCGCCGACAGCCGATCCGCCAA_267+ATAGCCAGCACG	1	42.5	7.63097e+07
201+CATCTTTATTACACTAGGTTGGGGCGGGTGCCCCAACTGATGTAACATTT_222+GACTGCGT	1	79	7.63097e+07
207+AAAAAT	1	93.2	7.63097e+07
16-G	1	97.9	7.63097e+07
20-CTG_40+CCCCGCGAAAATGCAT_70+C_81-TCT_97-C_143-T_163+CCCTT_185+GCGGCGGCTTGCGCGGCT_227+CCGC_252+AACATCAGGACGCACATGTCGG_322+CGGCCCCCGGCACATCA	1	43.6	7.63097e+07
204+AGGAAA	1	98.2	7.63097e+07
40-GGCTGACT_70-GGGT_104+TC_126-TTGGT_183-AGCGAG	1	47	7.63097e+07
203-GAG_329-G	1	97.6	7.63097e+07
202-TGAGGA_281-TCGGAAGAAACG	1	84	7.63097e+07
193-GGAAGAAAGTGAG_322-T	1	94.9	7.63097e+07
40-GGCTGACT_70-GGGT_123-GTC_177+CTGCGAC	1	47.4	7.63097e+07
200+AGTGAGGTTACCCGAGTTGGTGGGCGAGACCAGGTTTGTATAGAAAAGGTGAGTG	1	84.2	7.63097e+07
206+GAAGAT	1	97.6	7.63097e+07
20+C_56+AACAGGGCAAAA_75+CCCGGTAGTCATTCAGCGTGTAGACCTGGAACACGGTGACT_115+TCCCC_153+C_213+CCA_263-ACTAC_322+CGGCCCCAGGCTCAGCA	1	41	7.63097e+07
249-CAACGG	1	89.8	7.63097e+07
56+GAACAGGGCAAAA_80-AT_97-C_143-T_167+TGGCCCGTCCTTTTGAATCCCAT_226+TCCG_252+AACATCAGGTCGCTCATGTCGG_322+CGGCCCACGGCTCATCA	1	42.1	7.63097e+07
20-CTG_33+AGGATCGCCCCGCGAAAATGCATGGGGAACAGGGCAAAAATGCCCGCCAT_51+ATTCAG_66+C_110+ATGCA_153+C_202+CCA_263-AC_296+C_320+GCCCCCGGCTCAT	1	42.7	7.63097e+07
30+A_57+ACAGGGCAAAAATGGCGGCCATCAGCGCGGCCAGGGGGTCATTCAGCGTGTAG_107+TTGATGCATCACTCG_170+GCTAAG	1	39.3	7.63097e+07
257+G_323-G	1	88.9	7.63097e+07
202+A	1	97.6	7.63097e+07
208-GG_323-G	1	97.6	7.63097e+07
20-CTG_33+AGGATCGCCCCGCGAAAATGCATGGGGAACAGGGCAAAAATGCCCGCCAT_51+ATTCAG_66+C_110+ATGCA_153+C_213+CCA_263-ACTAC_322+CGGCCACCGACTCATCA	1	41.7	7.63097e+07
195-AAGAAAGTGAGGAGGAGGGTGGTA_321-G	1	85.5	7.63097e+07
198+AAACAACTTTCTTACAC_207+GAGCGGAAGAAAAAT	1	89.3	7.63097e+07
23+C_44-G	1	86.5	7.63097e+07
9-T_199-AAGTGAGG	1	95.8	7.63097e+07
244+AGATACAGAGGA	1	89.5	7.63097e+07
202-TGAGGA_307-G	1	90.4	7.63097e+07
20-CTG_33+AGGATCGCCCCGCGAAAATGCATGGGGAACAGGGCAAAAATGCCCGCCAT_51+ATTCAG_66+C_110+ATGCA_153+C_213+CCA_263-ACTAC_322+CGGCGCCCGGCTAATCA	1	41.7	7.63097e+07
206-GAGGA_323-G	1	86.4	7.63097e+07
216-GT_284+GA_317-GC	1	89.2	7.63097e+07
254-GAAGCTGAGACT	1	90.1	7.63097e+07
203-GAG_244-G	1	97.6	7.63097e+07
212-GGTGGT_326-G	1	90.4	7.63097e+07
46+AATGCATGGGGAACAGTGCATAAATGCCCGCCAGCAGCGCGGCCAGGGGGGCATTCAGCGTT_97+GTTT_118+CCTTTTGAA_207-AGGAGGGTGGTA_263+GAAATTAGCCAT	1	42	7.63097e+07
206+GAGGGTGGTGAGGAAGAAAGT_329-G	1	92.4	7.63097e+07
202-TGAGGA_321-G	1	93.7	7.63097e+07
188-GGTGAGGAAGAAAGTGAGGAGG_323-G	1	93.1	7.63097e+07
210+GTGGTAGTGCCACACAGAGAGCTTCGGATGTGGATACGACGGAAGCTGAGACTACGCCAGCGAGGTGAGAAAGAATGTAAGA_323-G	1	76.3	7.63097e+07
203-GAGGA_324+T	1	97.3	7.63097e+07
298-G	1	88.3	7.63097e+07
208+AGAGAGTACTCT	1	94.8	7.63097e+07
20+C_56+AACAGGGCAAAA_75+CCAGGGGGTCATTCAGCGTGTAGACCTGGAACACGGTGAAT_110+ATGCA_153+C_213+CCA_263-AC_298+CACCGAGCCAAACA	1	41.6	7.63097e+07
208+GGCCAAT	1	96.2	7.63097e+07
20-CTG_40+CCCCGCGAAAATGCAT_80-AT_97-C_143-T_167+TGGCCCGTCCT_185+GCTTGCGCGGCT_227+CCGC_252+AACATCAGGTCGCTCATGTCGG_322+CTGCCCCCGGCTCAGCA	1	42.5	7.63097e+07
208+TACGTAAACTCTGTGG	1	95.1	7.63097e+07
200-AGTGAGG_299-T	1	88.9	7.63097e+07
264-C	1	85.8	7.63097e+07
21+CAGGACGAAAGGATCGCCCCGCGAAAATGCATGGGGAACAGGGCAAAAA_38+GCCA_66+C_110+ATGCA_153+C_213+CCA_263-ACTAC_322+CTGCGCAGGGTTAGACA	1	41	7.63097e+07
20+C_57+ACAGGGCAAAAATGCCCGCCATCAGTGCGGCC_75+TAGACCTGGAACACGATGAAT_110+ATGCA_153+C_213+CAA_263-ACTAC_322+CGGCCCCAGGCTCATCA	1	41.5	7.63097e+07
200+AGTGAGTGCttttttttAAGAGTGGGTCCCATGGGTGAGGTGGAGTACGCGCTCGGGGAGCACAAAGGTTACCCCAGTTGGGGGGCGAGCCCAAATTTGTATAGAAAAGTTGGGAG	1	73	7.63097e+07
20-CTG_40+CCCCGCGAAAATGCAT_80-AT_97-C_143-T_167+TGGCCCGTCCT_185+GCTTGCGCGGCT_227+CCGC_252+AACATCAGGTCGCTCATGTCGG_322+CGGCCCAAGGCTCATCA	1	42.3	7.63097e+07
206+GAGGGTGGTAGTGCGACACAGAGAGCTTCGAATGTGGATACGACGGAAGCTGGGACTAGGGCAGCGAGGTGAGGAAGAATGT	1	79	7.63097e+07
197-GAAAGTGAGG_323-G	1	96.7	7.63097e+07
202-TGAGGA_248-ACAACGGAAGCTGAGACTACCGTATTGTTCACATCGGA	1	81.6	7.63097e+07
203-GAGG_324-T	1	96.7	7.63097e+07
200+ACAACGGTAGTATACAGAGTTATAGCGCGCACCCCAACTGGGGTAACCTTTGGGGTACCCGGGCGAGTACTCCAACTCAACAATGAGATCGATCAGGAAAGATACATTGATGAGTGTGGACAAACCACAACGTGGGTG	1	67	7.63097e+07
282+TA_314+CC	1	50.4	7.63097e+07
203-GAG_283-G	1	96.7	7.63097e+07
250+aaaaaa	1	86.4	7.63097e+07
19+TT	1	54.7	7.63097e+07
202-TGAGGA_262+G	1	88.6	7.63097e+07
250-A_304-C	1	91	7.63097e+07
318-CGA	1	94.9	7.63097e+07
203-GAGGAG_326-G	1	94.9	7.63097e+07
209+AAAGTGAT	1	96.5	7.63097e+07
200-AGTGAGG_250-A	1	95.8	7.63097e+07
20-CTG_45+CGAAAATGCATGGGGAACAGGGCAAA_53+CCATCAGCGC_78+ACCTGGAACACGGT_95+TTAACGA_110+ATGCA_153+C_213+CCA_263-ACTAC_322+CGGCCCCCGGCTCATCA	1	42.2	7.63097e+07
200+AGTGAGGTCCCATGGGTGAGGTGGAGTACGCGCCCGGGGAGCGCAAAGGTTACCCCAGGTGGGGGGCGCGCCCGACTTTGTATAGAAAAGTTGGGTG	1	76.5	7.63097e+07
180+CTGTCCTTTTGAATAACTGGCGTGGGCTTGCG_233+AAAG_252+AACATC_263+GTCGGTGGTCGGGTAGCTC_296+T_319+GGCCCCAGGCTCA	1	42.5	7.63097e+07
147-GCTGTGGGATGGATCAGATGCTACGATCGATGTCGCAGCGAGGTGAGGAAGAAAGTGAGGA_235-T	1	80.4	7.63097e+07
207+A_258-CT	1	83.8	7.63097e+07
189-GTGAGGA	1	92.2	7.63097e+07
21+CAGGACGAAAGCATCGCCCCGCGAAAATGCATGGGGAACAGGGCAAAAA_38+GCCA_66+C_110+ATGCA_153+C_213+CAA_263-AC_296+C_320+GCCCCAGGCTCAT	1	42.5	7.63097e+07
266-A_293+A	1	90.4	7.63097e+07
20+C_57+ACAGGGCAAAAATGCCCGCCATCAGCGCGGCC_75+TAGACCTGGAACACGGTGAAT_110+ATGCA_153+C_202+CCA_263-ACTAC_322+CGGCCCCAGGCTCATCA	1	41.3	7.63097e+07
76+CCATCAGCGCGGCC_81-TCT_97-C_143-T_163+CCCGTGGCCCG_185+GCTTGCGCGGCT_227+CCGC_252+AACATCAGGTCGCTCATGTCGG_322+CGGCCCCCGGCTCATCA	1	41.7	7.63097e+07
238-G	1	97.6	7.63097e+07
67+AAATGCCCGCCATCAGTGCGGCCAGGGAGTCATTCAGCGTGTAGACCTGGAACA_110+ATGCA_153+A_213+CCA_263-ACTAC_323+GGCCAGGGTTCATAAG	1	41.4	7.63097e+07
20+C_57+ACAGGGCAAAAATG_90+GTGTA_115+GTCGC_135+TTTCATGC_172-A_226+TCCG_252+AACATCAGGTCGCTCATGT_261+TGT_322+CGGCCCACGGCTCAGCA	1	42.9	7.63097e+07
20-CTG_40+CCCCGCGAAAATGCAT_80-AT_97-C_143-T_163+CCCTT_185+GCGGCGGCTTGCGCGGCT_227+CCGC_252+AACATCAGGTCGCTCATGTCGG_322+CGGCCCCCGGCTCATCA	1	42.3	7.63097e+07
197-GAAAGTGAGGAGGAG_265+TCACATAGTTTCCAAAACGTATACAGCGGAAGCGTAGAA	1	76.5	7.63097e+07
242-GTGGATACAACG	1	89.5	7.63097e+07
193-GGAAGAAAG	1	95.5	7.63097e+07
20-CTGCCAGCACGTACTGC_60-GATGT_113-TACGTTAACTGTCTTGGTGGTG_222-CCA	1	40.2	7.63097e+07
20-CTG_45+CGAAAATGCATGGGGAACAGGGCAAA_53+CCATCAGCGC_75+TAGACCTGGAACACGGTGAAT_110+ATGCA_153+C_213+CCA_263-ACTAC_323+GGCCCCCGGCTCATCAG	1	42.2	7.63097e+07
20-CTG_33+AGGATCGCCCCGCGAAAATGCATGGGGAACAGGGCAAAAATGCCCGCCAT_51+ATTCAG_66+C_110+ATGCA_153+C_213+CCA_263-ACTAC_310+AAACA_320+CCCCCAGCTCAT	1	42.2	7.63097e+07
199-AAG	1	97	7.63097e+07
20-CTG_33+AGGATCGCCCCGCGAAAATGCATGGGGAACAGGGCAAAAATGCCCGCCAT_51+ATTCAG_66+C_110+ATGCA_153+C_202+CCA_263-ACTAC_322+CGGCCCCCGGCTCATCA	1	41.7	7.63097e+07
29+TAGC_81-TCTGTCT_125-CTTGGTGGTGAGGATGA_153-GGAT_224-ACACA_245+ATA_269+GGCG_290+GTCG	1	43.8	7.63097e+07
20-CTG_40+CCCCGCGAAAATGCAT_80-AT_97-C_139-T_167+TGGCCCGTCCT_185+GCTTGCGCGGCT_226+GCCG_271+CGGTGGTCAGGTAGCTCAGGAA_310+AAACA_320+CCCCCGGCTCAT	1	42.3	7.63097e+07
198-AAAGTGAGGA_223-CA	1	95.2	7.63097e+07
13-TGCGC_164-ATGCTACGA_192+CA_231-GAGCTT	1	44.3	7.63097e+07
208-GGAG_280+A	1	84.3	7.63097e+07
207+AAGGTC	1	97.9	7.63097e+07
10-A_73-T_201-GTGAG	1	94.9	7.63097e+07
207+AAAAGA	1	96.7	7.63097e+07
205+C	1	96.4	7.63097e+07
14-G_132-GTGAGGATGAGTCGGGCTGTGGGATGGATCAGATGCTACGATCGATGTCGCAGCGAGGTGAGGAAGAAA	1	78	7.63097e+07
188-GGTGAGGAAGAAAGTGAGGAG	1	93.7	7.63097e+07
206+GAGGGTGGTAGTGCCACACAGAGAGCTTCGGATGTGGATACGACGGAAGCTGAGACTATGGCAGCGAGGTGAGGAAGAATGT	1	79.5	7.63097e+07
20-CTG_40+CCCCGCGAAAATGCAT_70+C_91+GTGTAG_115+GTCGC_135+TTTCATGC_179-T_227+CCGC_252+AACATCAGGTCGCTCATGTCGG_322+CGGCCCCCAGCTCATCA	1	43.1	7.63097e+07
34+G_48+G_125+GACA_134+CCTTTGCAC_171-GAT	1	46	7.63097e+07
202-TGAGGA_314-G	1	89.8	7.63097e+07
265-T_280+A_323-G	1	94.3	7.63097e+07
208+GGCGT	1	97	7.63097e+07
20-CTG_33+AGGATCGCCCCGCGAAAATGCATGGGGAACAGGGCAAAAATGCCCGCCAT_51+ATTCAG_66+C_110+ATGCA_155+GCTC_263-ACTAC_322+CGGCCCCCGGCACATCA	1	41	7.63097e+07
200+AGTGGTGGTGGAGTGGAAGGTTACCCCAGTGGAAGGTTACCCCAGTTGGGGGGCGCGCCCAACTTGGTATAGAAAAGTTGGGTG	1	79.1	7.63097e+07
185-CGAGGTGAGGAAGAAAGTGAGGA_326-G	1	92.2	7.63097e+07
40+TCATTC_67-CTGGGGTG_110+ATGCA_153+C_194+CCCCGC_236+CATG_244+C_294+GCC_306+C	1	46	7.63097e+07
200-AGTGAGG_297-C	1	94	7.63097e+07
207+A_305-G	1	91.3	7.63097e+07
201+CAACTTTATTATACAAAGTT_211+CCCCTACTGGTGTAACCTTTGGACTAAACG_223+ACTGCGTA	1	82.3	7.63097e+07
34+G_48+G_120+GTGTTGG	1	44.2	7.63097e+07
149+A_166+A	1	49.2	7.63097e+07
97-C	1	98.8	7.63097e+07
45-ACTGTCCGGGGATGCGATGTAT_193-GG_208-GGAGGGTGGTAGTGCCAC_249+AT_305+A_315+TC	1	42.7	7.63097e+07
145-G_200-AGTGAGG	1	96.4	7.63097e+07
169-ACGATCGATGTCGCAGCGAGGTGAGGAAGAAAGTG	1	86.4	7.63097e+07
20-CTG_40+CCCCGCGAAAATGCAT_80-AT_97-C_143-T_187+CAGGCGGCGGCTTGCGCGGCTCT_226+GCCA_252+AACATCAGGTCGCTCATGTCGG_322+CGGCCCCCAGCTCATCA	1	41.5	7.63097e+07
163-GATGCTACGATCGATGTCGCAGCGAGGTGAGGAAGAAAGTGAGG	1	71.1	7.63097e+07
10-AA_203-GAGGAG	1	97.6	7.63097e+07
43+AT_174+TTTGTTTTGC	1	42.2	7.63097e+07
186-GAGGTGAGGAAGAAAGTGA	1	91	7.63097e+07
21+CAGGACGAAAGGA_42+GAACAGGGCAAAAATGCCCGCCAT_63+CAGCGTGTAGACCTGG_110+ATGCA_153+C_213+CCA_263-ACTAC_322+CGGCCCCAGGCTCATCA	1	41.4	7.63097e+07
204+AAGGTTTGAAGAAAGTGAAAGTGAA	1	92.7	7.63097e+07
146-GGCTGTGGGATGGATCAGATGCTACGATCGATGTCGCAGCGAGGTGAGGAAGAAAGTGA	1	78.9	7.63097e+07
203-GAG_253+AGA	1	86.6	7.63097e+07
199-AAGTGAGGAG_326-G	1	95.2	7.63097e+07
20-CTG_33+AGGATCGCCCCGCGAAAATGCATGGGGAACAGGGCAAAAATGCCCGCCAT_51+ATTCAG_75+T_110+ATGCA_153+C_213+CCA_263-ACTAC_322+CGGCCCCCGGCTCATCA	1	41.9	7.63097e+07
76-AGGGATCTGTCTACCACCGGGCAAGAAGTGTAACGGATACGTTAACTGTCTTGGTGGTGAGGATGAGTCGGGCTGTGGGATGGATCAGATGCTACGATCGATGTCGCAGCGAGGTGAGGAAGAAAGTGA	1	59.6	7.63097e+07
20+CCAGGACGAAAGGATCGCC_33+TGGGGAACAGGGCAAAAATGCCCGCCAT_51+ATTCAG_66+C_110+ATGCA_153+C_213+CCA_263-ACTAC_322+CGGCCACCGGCTCATCA	1	42.2	7.63097e+07
50-C_197-GAAAGTGAGG	1	95.2	7.63097e+07
282-C_304+C	1	90.4	7.63097e+07
204+GAC	1	81.9	7.63097e+07
52-G_166-GCTACGATCGATGTCGCAGCGAGGTGAGGAAGAAAGTGA	1	87	7.63097e+07
191-GAGGAAGAAAGTGA	1	94.3	7.63097e+07
319-GA	1	98.5	7.63097e+07
224-ACACAG	1	88	7.63097e+07
200+AGTGAGGACTTTGTGTAGAACTTGGTATAGAAAAGTTGGGTG	1	88	7.63097e+07
10-A_52-GGGGATGCGATGTATCTGGGGTGGAGGGATCTGTCTACCACCGGGCAAGAAGTGTAACGGATACGTTAACTGTCTTGGTGGTGAGGATGAGTCGGGCTGTGGGATGGATCAGATGCTACGATCGATGTCGCAGCGAGGTGAGGAAGAAAGTGAGGA	1	52.1	7.63097e+07
131-G_203-GAG	1	98.8	7.63097e+07
208+AGAAAG_320-A	1	96.4	7.63097e+07
202-TGAGGA_299-T	1	97.9	7.63097e+07
30+A_56+AACAGGGCAAAA_70+C_81-TCT_97-C_134-GAG_152+GTTTCATGCATCACCCG_180+GGCTTGCG_203+AACAGCTAAGCGCCGACAACCCATGCGCCAA_244+CGGTGGTG_281+CCAC	1	43.7	7.63097e+07
20-CTG_40+CCCCGCGAAAATGCAT_70+C_80-ATC_97-C_143-T_167+TGGCCCGTCCT_185+GCTTGCGCGTCT_227+CCGC_252+AACATCAGGTCGCTCATGTCGG_322+CGGCCCCAAGCTCATCA	1	43.1	7.63097e+07
232-AGCTTC	1	89.5	7.63097e+07
209+AGGAAGT	1	96.8	7.63097e+07
250-A_303-G	1	87	7.63097e+07
35+CGCCCCGCGAAATTGCATGGGGAACAGGGCAAAAATGC_63+CAGCGTGTAGACCTGG_110+ATGCA_155+GCAC_263-ACTAC_306+AGCCAAACAGAAAGAGC	1	40	7.63097e+07
209+CGTATAGAAAAAGTATATTGTATAGAAAAGTTGGGTGAGTGAGAAT	1	86.8	7.63097e+07
72-GTGGAGGGATCTGTCTACCACCGGGCAAGAAGTGTAACGGATACGTTAACTGTCTTGGTGGTGAGGATGAGTCGGGCTGTGGGATGGATCAGATGCTACGATCGATGTCGCAGCGAGGTGAGGAAGAAAGT	1	58.4	7.63097e+07
20-CTG_33+AGGATCGCCCCGCGAAAATGCATGGGGAACAGGGCAAAAATGCCCGCCAT_51+ATTCAG_66+C_110+ATGCA_153+C_213+CCA_263-AC_297+C_321+CCCCCGGCTCATC	1	42.5	7.63097e+07
208+AC	1	97.9	7.63097e+07
45-ACTGTCCGGGGATGCGATGTAT_193-GG_208-GGAGGGTGGTAGTGCCAC_249+AT_305-GT	1	41.9	7.63097e+07
20-CTG_33+AGGATCGCCCCGCGAAAATGCATGGGGAACAGGGCAAAAATGCCCGCCAT_51+ATTCAG_66+C_115+TCCCC_153+C_213+CCA_263-ACTAC_322+CGGCCCCCGGCTCATCA	1	41.4	7.63097e+07
190-TGAGGAAGAAAGTGA_324-T	1	93.7	7.63097e+07
152-G_193-GGAAGAAAGTGAGG	1	95.5	7.63097e+07
21+CAGGACGAAAGGA_33+AATGCATGGGGAACAGGGCAAAAATGCCCGCCAT_51+ATTCAG_66+C_110+ATGCA_153+C_213+CCA_263-ACTAC_322+CTGCCCCCGGCTCATCA	1	42	7.63097e+07
10-A_194-GAAGAAAGTGAGGAGGAGGGT	1	92.2	7.63097e+07
20-CTG_40+CCCCGCGAAAATGCAT_70+C_91+GTGTAG_115+GTCGC_135+TTTCATGC_179-T_228+CGCCAAA_261+CTCATGTCGGTGGTCGGGT_309+CAAG_319+GGCCGCCGGCTCA	1	43.3	7.63097e+07
200+AGTGAAAGTATCAACTTGAAAAAGTGGCCCCGAGTCGGTGCttttttttACGCGGGGGTCCCATGGGTGAGGTGGAGTACGCGCCCGGGGAGCCCAAAGGTTACCCCAGTTGGGTGGCGCGCTCAACTTTGTATAGAAAAGTTGGGTG	1	68.3	7.63097e+07
124-TCTTGGT_186-G_209-GAGGGTGGT_233-GCTTCGG_281-T_299-T_316+TT	1	46.2	7.63097e+07
8-GTA_197-GAAAGTGAG	1	96.4	7.63097e+07
20-CTG_40+CCCCGCGAAAATGCAT_80-AT_97-C_143-T_163+CCCGT_185+GCCGCGGCTTGCGCGGCT_227+CCGC_252+AACATCAGGTCGCTCATGTCGG_322+CGGCCCCCGGCTCATCA	1	42.3	7.63097e+07
20+C_56+AACAGGGCAAAA_89+AGCGTGT_115+GTCGC_135+TTTCATGC_172-A_227+CCGC_252+AACATCAGGTCGCTCATGTCGG_322+CGGCCCCCAGCGCATCA	1	42.4	7.63097e+07
206+GAGGGTGGTAGTGCCACACAGAGAGCTTCGGATGTGGATACGACGGAAGCTGAGACTACGGCAGCGAGGTGAGGAAGAATGT_323-G	1	79.2	7.63097e+07
324-TAGA	1	97.3	7.63097e+07

## Sheet: CT2 g2
label	abundance	maxid	freq
Ref	70910	100	0.481516
202-TGAGGA	18093	98.2	0.122861
207+A	6254	99.7	0.0424679
203-GAG	3525	99.1	0.0239366
197-GAAAGTGAG	3472	97.3	0.0235767
200-AGTGAGG	3277	97.9	0.0222526
203-GAGGAG	2863	98.2	0.0194413
199-AAGTGAGG	2473	97.6	0.016793
196-AGAAAGTGAGG	2356	96.7	0.0159985
198-AAAGTGAGGA	1983	97	0.0134656
206-GA	1747	99.4	0.011863
207-A	1667	99.7	0.0113198
204-AGGA	1534	98.8	0.0104167
189-GTGAGGAAGAAA	1407	96.4	0.00955427
201-GTGAGG	1313	98.2	0.00891596
203-GAGGA	1284	98.5	0.00871904
197-GAAAGTGAGG	1050	97	0.00713005
189-GTGAGGAAGAAAGTGAGGA	845	94.3	0.00573799
201-GTGAG	749	98.5	0.0050861
205-GG	716	99.4	0.00486202
203-GAGG	676	98.8	0.0045904
205-G	639	99.7	0.00433915
194-GAAGAAAGTGAGGA	633	95.8	0.0042984
193-GGAAGAAAGTGAG	630	96.1	0.00427803
195-AAGAAAGTGAGGA	592	96.1	0.00401999
191-GAGGAAGAAAGTGAG	576	95.5	0.00391134
323-G	371	99.7	0.00251929
171-GATCGATGTCGCAGCGAGGTGAGGAAGAAAGTGAG	327	89.5	0.0022205
208-G	270	99.7	0.00183344
193-GGAAGAAAGTGAGG	260	95.8	0.00176554
186-GAGGTGAGGAAGAAAGTGAG	247	94	0.00167726
324-T	221	99.7	0.00150071
188-GGTGAGGAAGAAAGTGAG	203	94.6	0.00137848
190-TGAGGAAGAAAGTGA	192	95.2	0.00130378
164-ATGCTACGATCGATGTCGCAGCGAGGTGAGGAAGAAAGTGAGGA	189	86.7	0.00128341
34+G_48+G_104-TGT_134-GA_161+TTCGG_174+TTTGTTTTGC	184	48.3	0.00124946
191-GAGGAAGAAAGTGAGG	179	95.2	0.0012155
192-AGGAAGAAAGTGAGGA	165	95.2	0.00112044
197-GAAAGTGAGGAG	165	96.4	0.00112044
10-A	159	99.7	0.00107969
191-GAGGAAGAAAGTGAGGA	158	94.9	0.0010729
200-AGTGAGGAGG	150	97	0.00101858
208-GG	150	99.4	0.00101858
208+G	132	99.7	0.000896349
180-CGCAGCGAGGTGAGGAAGAAAGTGAGGA	130	91	0.000882768
148-CTGTGGGATGGATCAGATGCTACGATCGATGTCGCAGCGAGGTGAGGAAGAAAGTGAGGA	126	81.9	0.000855606
185-CGAGGTGAGGAAGAAAGTGAGGA	115	93.1	0.00078091
327-A	112	99.7	0.000760539
205+G	108	99.7	0.000733377
205-GGAG	106	98.8	0.000719796
20-CTG_33+AGGATCGCCCCGCGAAAATGCATGGGGAACAGGGCAAAAATGCCCGCCAT_51+ATTCAG_66+C_110+ATGCA_153+C_213+CCA_263-ACTAC_322+CGGCCCCCGGCTCATCA	103	41.9	0.000699424
202-TGAGGA_323-G	102	97.9	0.000692634
138-ATGAGTCGGGCTGTGGGATGGATCAGATGCTACGATCGATGTCGCAGCGAGGTGAGGAAGAAAGTGAGGA	99	78.9	0.000672262
183-AGCGAGGTGAGGAAGAAAGTGAGGA	97	92.5	0.000658681
186-GAGGTGAGGAAGAAAGT	94	94.9	0.000638309
205-GGAGGAG	90	97.9	0.000611147
86-CTACCACCGGGCAAGAAGTGTAACGGATACGTTAACTGTCTTGGTGGTGAGGATGAGTCGGGCTGTGGGATGGATCAGATGCTACGATCGATGTCGCAGCGAGGTGAGGAAGAAAGTGAGGA	89	63	0.000604357
190-TGAGGAAGAAAGTGAGGA	85	94.6	0.000577195
166-GCTACGATCGATGTCGCAGCGAGGTGAGGAAGAAAGTGAGGA	83	87.3	0.000563614
189-GTGAGGAAGAAAGTGA	81	94.6	0.000550033
202-TGA	77	99.1	0.00052287
203-GAGGAGGAG	74	97.3	0.000502499
21-TGCCAGCACGTA_73-TGGAGGGATCTGT	71	49.1	0.000482127
134-GAGGATGAGTCGGGCTGTGGGATGGATCAGATGCTACGATCGATGTCGCAGCGAGGTGAGGAAGAAAGTGAG	71	78.3	0.000482127
188-GGTGAGGAAGAAAGTGAGGAG	70	93.7	0.000475337
183-AGCGAGGTGAGGAAGAAAGTGAGG	69	92.8	0.000468546
329-G	68	99.7	0.000461756
149-TGTGGGATGGATCAGATGCTACGATCGATGTCGCAGCGAGGTGAGGAAGAAAGTGAGGA	67	82.2	0.000454965
208+AG	66	98.8	0.000448175
326-G	66	99.7	0.000448175
76-AGGGATCTGTCTACCACCGGGCAAGAAGTGTAACGGATACGTTAACTGTCTTGGTGGTGAGGATGAGTCGGGCTGTGGGATGGATCAGATGCTACGATCGATGTCGCAGCGAGGTGAGGAAGAAAGTGAGGA	65	60.2	0.000441384
196-AGAAAGTGAGGAGG	65	95.8	0.000441384
153-GGATGGATCAGATGCTACGATCGATGTCGCAGCGAGGTGAGGAAGAAAGTGAGGA	64	82.5	0.000434594
186-GAGGTGAGGAAGAAAGTGAGGA	64	93.4	0.000434594
87-TACCACCGGGCAAGAAGTGTAACGGATACGTTAACTGTCTTGGTGGTGAGGATGAGTCGGGCTGTGGGATGGATCAGATGCTACGATCGATGTCGCAGCGAGGTGAGGAAGAAAGTGAGGA	64	63.6	0.000434594
125-CTTGGTGGTGAGGATGAGTCGGGCTGTGGGATGGATCAGATGCTACGATCGATGTCGCAGCGAGGTGAGGAAGAAAGTGAGGA	63	75	0.000427803
152-GGGATGGATCAGATGCTACGATCGATGTCGCAGCGAGGTGAGGAAGAAAGTGAGGA	63	83.1	0.000427803
203-GAGGAGGA	62	97.6	0.000421013
325-A	61	99.7	0.000414222
201-GTGAGGAG	60	97.6	0.000407432
122-TGTCTTGGTGGTGAGGATGAGTCGGGCTGTGGGATGGATCAGATGCTACGATCGATGTCGCAGCGAGGTGAGGAAGAAAGTGAGGA	60	74.1	0.000407432
208-GGAGG	60	98.5	0.000407432
208-GGAGGGT	57	97.9	0.00038706
208+AGAAAG	57	98.2	0.00038706
191-GAGGAAG	56	81.5	0.000380269
60-GATGTATCTGGGGTGGAGGGATCTGTCTACCACCGGGCAAGAAGTGTAACGGATACGTTAACTGTCTTGGTGGTGAGGATGAGTCGGGCTGTGGGATGGATCAGATGCTACGATCGATGTCGCAGCGAGGTGAGGAAGAAAGTGAG	56	56	0.000380269
132-GTGAGGATGAGTCGGGCTGTGGGATGGATCAGATGCTACGATCGATGTCGCAGCGAGGTGAGGAAGAAAGTGAGGA	56	77.1	0.000380269
198-AAAGTGAGGAGGA	56	95.8	0.000380269
208-GGAG	56	98.8	0.000380269
207-AGGA	56	98.8	0.000380269
145-GGGCTGTGGGATGGATCAGATGCTACGATCGATGTCGCAGCGAGGTGAGGAAGAAAGTGAGGA	54	80.7	0.000366688
169-ACGATCGATGTCGCAGCGAGGTGAGGAAGAAAGTGAGGA	54	88.3	0.000366688
176-ATGTCGCAGCGAGGTGAGGAAGAAAGTGAGGA	53	90.4	0.000359898
168-TACGATCGATGTCGCAGCGAGGTGAGGAAGAAAGTGAGGA	52	88	0.000353107
169-ACGATCGATGTCGCAGCGAGGTGAGGAAGAAAGTGAGG	52	88.6	0.000353107
178-GTCGCAGCGAGGTGAGGAAGAAAGTGAGGA	51	90.7	0.000346317
199-AAGTGAGGAGG	51	96.7	0.000346317
195-AAGAAAGTGAGGAGGA	49	94.3	0.000332736
205-GGAGGAGGGT	48	97	0.000325945
200-AGTGAG	47	98.2	0.000319155
191-GAGGAAGAAAGTGAGGAG	46	94.6	0.000312364
112-ATACGTTAACTGTCTTGGTGGTGAGGATGAGTCGGGCTGTGGGATGGATCAGATGCTACGATCGATGTCGCAGCGAGGTGAGGAAGAAAGTGAGGA	45	71.1	0.000305574
204-A	45	99.7	0.000305574
207+AAGAA	45	98.2	0.000305574
202-TGAGGA_324-T	44	96.7	0.000298783
200-AGTGAGGAG	42	97.3	0.000285202
204-AGGAGGA	42	97.9	0.000285202
84-GTCTACCACCGGGCAAGAAGTGTAACGGATACGTTAACTGTCTTGGTGGTGAGGATGAGTCGGGCTGTGGGATGGATCAGATGCTACGATCGATGTCGCAGCGAGGTGAGGAAGAAAGTGAGGA	41	62.7	0.000278412
56-ATGCGATGTATCTGGGGTGGAGGGATCTGTCTACCACCGGGCAAGAAGTGTAACGGATACGTTAACTGTCTTGGTGGTGAGGATGAGTCGGGCTGTGGGATGGATCAGATGCTACGATCGATGTCGCAGCGAGGTGAGGAAGAAAGTGAGGA	40	53.9	0.000271621
145-GGGCTGTGGGATGGATCAGATGCTACGATCGATGTCGCAGCGAGGTGAGGAAGAAAGTGA	40	81.9	0.000271621
143-TCGGGCTGTGGGATGGATCAGATGCTACGATCGATGTCGCAGCGAGGTGAGGAAGAAAGTGAGGA	40	79.5	0.000271621
205-GGAGG	40	98.2	0.000271621
207+A_323-G	40	99.4	0.000271621
201-GTGAGGAGGAGG	40	96.4	0.000271621
99-AGAAGTGTAACGGATACGTTAACTGTCTTGGTGGTGAGGATGAGTCGGGCTGTGGGATGGATCAGATGCTACGATCGATGTCGCAGCGAGGTGAGGAAGAAAGTGAGG	38	67.2	0.00025804
69-GGGGTGGAGGGATCTGTCTACCACCGGGCAAGAAGTGTAACGGATACGTTAACTGTCTTGGTGGTGAGGATGAGTCGGGCTGTGGGATGGATCAGATGCTACGATCGATGTCGCAGCGAGGTGAGGAAGAAAGTGAGGA	37	58.1	0.000251249
93-CGGGCAAGAAGTGTAACGGATACGTTAACTGTCTTGGTGGTGAGGATGAGTCGGGCTGTGGGATGGATCAGATGCTACGATCGATGTCGCAGCGAGGTGAGGAAGAAAGTGAGGA	37	65.4	0.000251249
207+AAAGTC	37	98.2	0.000251249
206+TGGTAGTGCCCC	36	95.1	0.000244459
154-GATGGATCAGATGCTACGATCGATGTCGCAGCGAGGTGAGGAAGAAAGTGAGGA	36	82.8	0.000244459
85-TCTACCACCGGGCAAGAAGTGTAACGGATACGTTAACTGTCTTGGTGGTGAGGATGAGTCGGGCTGTGGGATGGATCAGATGCTACGATCGATGTCGCAGCGAGGTGAGGAAGAAAGTGAGGA	36	63	0.000244459
322-T	36	99.7	0.000244459
88-ACCACCGGGCAAGAAGTGTAACGGATACGTTAACTGTCTTGGTGGTGAGGATGAGTCGGGCTGTGGGATGGATCAGATGCTACGATCGATGTCGCAGCGAGGTGAGGAAGAAAGTGAGG	35	64.2	0.000237668
207-AGGAGGGT	35	96.4	0.000237668
202-TGAGGAGGA	35	97.3	0.000237668
135-AGGATGAGTCGGGCTGTGGGATGGATCAGATGCTACGATCGATGTCGCAGCGAGGTGAGGAAGAAAGTGAGGA	34	78	0.000230878
194-GAAGAAAGTGA	34	96.4	0.000230878
137-GATGAGTCGGGCTGTGGGATGGATCAGATGCTACGATCGATGTCGCAGCGAGGTGAGGAAGAAAGTGAGGA	34	78.6	0.000230878
206+GGC	33	97.6	0.000224087
130-TGGTGAGGATGAGTCGGGCTGTGGGATGGATCAGATGCTACGATCGATGTCGCAGCGAGGTGAGGAAGAAAGTGAGGA	33	76.5	0.000224087
193-GGAAGAAAGTGAGGAGG	33	94.3	0.000224087
99-AGAAGTGTAACGGATACGTTAACTGTCTTGGTGGTGAGGATGAGTCGGGCTGTGGGATGGATCAGATGCTACGATCGATGTCGCAGCGAGGTGAGGAAGAAAGTGAGGAGGAGGGTGGTAG	32	61.1	0.000217297
208-GGAGGGTG	32	96.1	0.000217297
186-GAGGTGAGGAAGAAAGTGAGGAG	32	93.1	0.000217297
155-ATGGATCAGATGCTACGATCGATGTCGCAGCGAGGTGAGGAAGAAAGTGAGGA	32	82.8	0.000217297
10-A_202-TGAGGA	32	97.6	0.000217297
161-CAGATGCTACGATCGATGTCGCAGCGAGGTGAGGAAGAAAGTGAGG	31	85.2	0.000210506
194-GAAGAAAGTGAGGAGGA	31	94.9	0.000210506
107-AACGGATACGTTAACTGTCTTGGTGGTGAGGATGAGTCGGGCTGTGGGATGGATCAGATGCTACGATCGATGTCGCAGCGAGGTGAGGAAGAAAGTGAGGA	31	69.6	0.000210506
29+TAGC_81-TCTGTCT_125-CTTGGTGGTGAGGATGA_153-GGAT_224-ACACA_245+ATA_270+GCGGAACGGCACAC_311-GAAGAA	30	43.1	0.000203716
103-GTGTAACGGATACGTTAACTGTCTTGGTGGTGAGGATGAGTCGGGCTGTGGGATGGATCAGATGCTACGATCGATGTCGCAGCGAGGTGAGGAAGAAAGTGAGG	30	68.1	0.000203716
120-ACTGTCTTGGTGGTGAGGATGAGTCGGGCTGTGGGATGGATCAGATGCTACGATCGATGTCGCAGCGAGGTGAGGAAGAAAGTGAGG	30	73.8	0.000203716
175-GAT	30	83.2	0.000203716
151-TGGGATGGATCAGATGCTACGATCGATGTCGCAGCGAGGTGAGGAAGAAAGTGAGGAGGA	29	81.9	0.000196925
207+AAGAAAGAA	29	97.4	0.000196925
123-GTCTTGGTGGTGAGGATGAGTCGGGCTGTGGGATGGATCAGATGCTACGATCGATGTCGCAGCGAGGTGAGGAAGAAAGTGAGG	29	73.8	0.000196925
321-G	29	99.7	0.000196925
50-CCGGGGATGCGATGTATCTGGGGTGGAGGGATCTGTCTACCACCGGGCAAGAAGTGTAACGGATACGTTAACTGTCTTGGTGGTGAGGATGAGTCGGGCTGTGGGATGGATCAGATGCTACGATCGATGTCGCAGCGAGGTGAGGAAGAAAGTGAGGA	28	52.1	0.000190135
140-GAGTCGGGCTGTGGGATGGATCAGATGCTACGATCGATGTCGCAGCGAGGTGAGGAAGAAAGTGAGGAGGAG	28	78.3	0.000190135
81-TCTGTCTACCACCGGGCAAGAAGTGTAACGGATACGTTAACTGTCTTGGTGGTGAGGATGAGTCGGGCTGTGGGATGGATCAGATGCTACGATCGATGTCGCAGCGAGGTGAGGAAGAAAGTGAGG	28	61.7	0.000190135
163-GATGCTACGATCGATGTCGCAGCGAGGTGAGGAAGAAAGTGAGGAGGAG	27	85.2	0.000183344
201-GTGAGGAGGAGGGTGGTAGTGCC	27	91.3	0.000183344
197-GAAAGTGAGGAGG	27	96.1	0.000183344
204+GAA	26	98.2	0.000176554
201+CAACTTT_262+CTCCACCTCACCCATGCGATCGCTCCGGAG	26	79.7	0.000176554
140-GAGTCGGGCTGTGGGATGGATCAGATGCTACGATCGATGTCGCAGCGAGGTGAGGAAGAAAGTGAG	26	80.1	0.000176554
144-CGGGCTGTGGGATGGATCAGATGCTACGATCGATGTCGCAGCGAGGTGAGGAAGAAAGTGAGGA	26	80.7	0.000176554
206+GT	26	99.4	0.000176554
197-GAAAGTGAG_323-G	26	97	0.000176554
208-GGAGGG	26	98.2	0.000176554
205+ggagtggagggaggagggtgtagtggagt	25	92	0.000169763
164-ATGCTACGATCGATGTCGCAGCGAGGTGAGGAAGAAAGTGAGGAGGAGGGTGGTAGTGCCACA	25	80.1	0.000169763
128-GGTGGTGAGGATGAGTCGGGCTGTGGGATGGATCAGATGCTACGATCGATGTCGCAGCGAGGTGAGGAAGAAAGTGAGG	25	76.2	0.000169763
206-GAGGA	25	98.5	0.000169763
201+GGTGAG_207+AAGAA	24	95.6	0.000162973
205+GGGTGGAGGGTGAGGGT	24	93.4	0.000162973
128-GGTGGTGAGGATGAGTCGGGCTGTGGGATGGATCAGATGCTACGATCGATGTCGCAGCGAGGTGAGGAAGAAAGTG	24	75.3	0.000162973
110-GGATACGTTAACTGTCTTGGTGGTGAGGATGAGTCGGGCTGTGGGATGGATCAGATGCTACGATCGATGTCGCAGCGAGGTGAGGAAGAAAGTGAGGA	24	70.5	0.000162973
91-ACCGGGCAAGAAGTGTAACGGATACGTTAACTGTCTTGGTGGTGAGGATGAGTCGGGCTGTGGGATGGATCAGATGCTACGATCGATGTCGCAGCGAGGTGAGGAAGAAAGTGAGG	24	65.1	0.000162973
63-GTATCTGGGGTGGAGGGATCTGTCTACCACCGGGCAAGAAGTGTAACGGATACGTTAACTGTCTTGGTGGTGAGGATGAGTCGGGCTGTGGGATGGATCAGATGCTACGATCGATGTCGCAGCGAGGTGAGGAAGAAAGTGAGGA	24	56.3	0.000162973
157-GGATCAGATGCTACGATCGATGTCGCAGCGAGGTGAGGAAGAAAGTGAGGA	24	84.6	0.000162973
207+GTGA	24	98.5	0.000162973
181-GCAGCGAGGTGAGGAAGAAAGTGAGGA	23	90.7	0.000156182
67-CTGGGGTGGAGGGATCTGTCTACCACCGGGCAAGAAGTGTAACGGATACGTTAACTGTCTTGGTGGTGAGGATGAGTCGGGCTGTGGGATGGATCAGATGCTACGATCGATGTCGCAGCGAGGTGAGGAAGAAAGTGAGGAGGAGGGTG	23	54.5	0.000156182
34+G_48+G_147+TAATAGATT	23	44.4	0.000156182
166-GCTACGATCGATGTCGCAGCGAGGTGAGGAAGAAAGTGAGG	23	87.3	0.000156182
206+TACTCACCT	23	97.1	0.000156182
163-GATGCTACGATCGATGTCGCAGCGAGGTGAGGAAGAAAGTGAG	23	86.1	0.000156182
188-GGTGAGGAAGAAAGTGAGG	23	94.3	0.000156182
202-TGAGGA_327-A	23	97.6	0.000156182
192-AGGAAGAAAGTGAGGAGGA	23	94.3	0.000156182
43+AT_125+GACA_134+CCTTTGCAC_171-GAT	22	44.6	0.000149392
208+CAC	22	97.6	0.000149392
157-GGATCAGATGCTACGATCGATGTCGCAGCGAGGTGAGGAAGAAAGTGAG	22	84.3	0.000149392
19+CCCAAAAGGATAGAA_136-GG_152-GGGATG_191-GA_213-GTGGTA_229-GAGAGCTTCGG_270-TA_311-GAAGAA	21	44.1	0.000142601
201+CAACTTTATTATACAAAGTTGTGGCGCGCCCCCCAACTG	21	87.6	0.000142601
86-CTACCACCGGGCAAGAAGTGTAACGGATACGTTAACTGTCTTGGTGGTGAGGATGAGTCGGGCTGTGGGATGGATCAGATGCTACGATCGATGTCGCAGCGAGGTGAGGAAGAAAGTGAGG	21	63.6	0.000142601
127-TGGTGGTGAGGATGAGTCGGGCTGTGGGATGGATCAGATGCTACGATCGATGTCGCAGCGAGGTGAGGAAGAAAGTGAGGA	21	75.6	0.000142601
202-TGAGGA_329-G	21	97.6	0.000142601
207+A_324-T	21	99.4	0.000142601
7-G	21	99.7	0.000142601
58-GCGATGTATCTGGGGTGGAGGGATCTGTCTACCACCGGGCAAGAAGTGTAACGGATACGTTAACTGTCTTGGTGGTGAGGATGAGTCGGGCTGTGGGATGGATCAGATGCTACGATCGATGTCGCAGCGAGGTGAGGAAGAAAGTGAGG	20	53.9	0.000135811
136-GGATGAGTCGGGCTGTGGGATGGATCAGATGCTACGATCGATGTCGCAGCGAGGTGAGGAAGAAAGTGAG	20	77.7	0.000135811
206+GACAAGTGACAAGTGACAAGT	20	93.5	0.000135811
207+AGC	20	99.1	0.000135811
126-TTGGTGGTGAGGATGAGTCGGGCTGTGGGATGGATCAGATGCTACGATCGATGTCGCAGCGAGGTGAGGAAGAAAGTGAGG	20	75	0.000135811
67-CTGGGGTGGAGGGATCTGTCTACCACCGGGCAAGAAGTGTAACGGATACGTTAACTGTCTTGGTGGTGAGGATGAGTCGGGCTGTGGGATGGATCAGATGCTACGATCGATGTCGCAGCGAGGTGAGGAAGAAAGTGAGGA	20	57.5	0.000135811
204+TA	20	98.8	0.000135811
208+AAG	20	99.1	0.000135811
206+A	20	99.4	0.000135811
96-GCAAGAAGTGTAACGGATACGTTAACTGTCTTGGTGGTGAGGATGAGTCGGGCTGTGGGATGGATCAGATGCTACGATCGATGTCGCAGCGAGGTGAGGAAGAAAGTGAGGA	20	66.3	0.000135811
10-A_207+A	20	99.4	0.000135811
59-CGATGTATCTGGGGTGGAGGGATCTGTCTACCACCGGGCAAGAAGTGTAACGGATACGTTAACTGTCTTGGTGGTGAGGATGAGTCGGGCTGTGGGATGGATCAGATGCTACGATCGATGTCGCAGCGAGGTGAGGAAGAAAGTGAGGA	19	54.5	0.00012902
208+AAGAAGT	19	97.9	0.00012902
34+G_48+G_120-ACT_134-GA_161+TTCGG_174+TTTGTTTTGC	19	47.5	0.00012902
200+AGTGAGGAATGAGAAGTTGGGTG	19	93	0.00012902
201+CAACTTTATTATACAAAGTT_209+CCCCCCAACTGGGGTAACCTTTC	19	85.6	0.00012902
207+GGCA	19	97.6	0.00012902
202+T	19	97.9	0.00012902
179-TCGCAGCGAGGTGAGGAAGAAAGTGAGGA	19	90.4	0.00012902
206+GA	19	99.4	0.00012902
131-GGTGAGGATGAGTCGGGCTGTGGGATGGATCAGATGCTACGATCGATGTCGCAGCGAGGTGAGGAAGAAAGTGAGG	19	76.8	0.00012902
61-ATGTATCTGGGGTGGAGGGATCTGTCTACCACCGGGCAAGAAGTGTAACGGATACGTTAACTGTCTTGGTGGTGAGGATGAGTCGGGCTGTGGGATGGATCAGATGCTACGATCGATGTCGCAGCGAGGTGAGGAAGAAAGTGAGGA	18	55.7	0.000122229
211+TCAC	18	97.6	0.000122229
207+AA	18	98.8	0.000122229
202-TGAGGA_326-G	18	97	0.000122229
133-TGAGGATGAGTCGGGCTGTGGGATGGATCAGATGCTACGATCGATGTCGCAGCGAGGTGAGGAAGAAAGTGAGGA	17	77.4	0.000115439
153-GGATGGATCAGATGCTACGATCGATGTCGCAGCGAGGTGAGGAAGAAAGTGA	17	84	0.000115439
195-AAGAAAGTGAGGA_216-GTAGTGCCACACAGAGAGCTTCGGATGTGGATACAACGGAAGCTGAGACTACCGTATTGTTCACATCGGAAGAAACGACGA	17	70.8	0.000115439
117-TTAACTGTCTTGGTGGTGAGGATGAGTCGGGCTGTGGGATGGATCAGATGCTACGATCGATGTCGCAGCGAGGTGAGGAAGAAAGTGAGGA	17	72.3	0.000115439
159-ATCAGATGCTACGATCGATGTCGCAGCGAGGTGAGGAAGAAAGTGAGGA	17	84.3	0.000115439
200+AGTGAGGTTACCCCAGTTGGGGGGCGCGCCCAACTTTGTATAGAAAAGTTGGGTG	17	85	0.000115439
161-CAGATGCTACGATCGATGTCGCAGC_194-GAAGAAAGTGAGGA	17	88	0.000115439
9-T	17	99.7	0.000115439
200-AGTGAGG_323-G	17	97.6	0.000115439
202-TGAGGA_322-T	17	96.7	0.000115439
162-AGATGCTACGATCGATGTCGCAGCGAGGTGAGGAAGAAAGTGAGG	17	86.1	0.000115439
145-GGGCTGTGGGATGGATCAGATGCTACGATCGATGTCGCAGCGAGGTGAGGAAGAAAGTGAG	16	81.6	0.000108648
181-GCAGCGAGGTGAGGAAGAAAGTGAG	16	91.6	0.000108648
19+CCCAAAAGGATAGAA_38+ACCTCAAC_70+CTCT_127-TGGTGGTGAGGA_152-GGGATG_208-GGAGGGTG_229-GAGAGCTTCGG_270-TA_311-GAAGAA	16	43.7	0.000108648
208+CTGGTAGGTGAGGAAGAAAGTGAGGAAGAAAG	16	91.2	0.000108648
208+C	16	97.6	0.000108648
147-GCTGTGGGATGGATCAGATGCTACGATCGATGTCGCAGCGAGGTGAGGAAGAAAGTGAGGAGGA	16	80.1	0.000108648
52-GGGGATGCGATGTATCTGGGGTGGAGGGATCTGTCTACCACCGGGCAAGAAGTGTAACGGATACGTTAACTGTCTTGGTGGTGAGGATGAGTCGGGCTGTGGGATGGATCAGATGCTACGATCGATGTCGCAGCGAGGTGAGGAAGAAAGTGA	16	53.3	0.000108648
207+AGGGAGAAAGGAAGAA	16	94.5	0.000108648
122-TGTCTTGGTGGTGAGGATGAGTCGGGCTGTGGGATGGATCAGATGCTACGATCGATGTCGCAGCGAGGTGAGGAAGAAAGTGAGGAGGA	16	73.2	0.000108648
172-ATCGATGTCGCAGCGAGGTGAGGAAGAAAGTGAGGA	16	89.2	0.000108648
208+CGG	16	97.9	0.000108648
158-GATCAGATGCTACGATCGATGTCGCAGCGAGGTGAGGAAGAAAGTGAGGA	16	84	0.000108648
205-GGAGGAGGGTGGTAGTGCCACACAGAGAGCTTC	16	89.8	0.000108648
77-G	16	98.8	0.000108648
271-A	16	99.1	0.000108648
209+T	16	99.1	0.000108648
203-GAG_323-G	16	98.8	0.000108648
204+A	16	98.5	0.000108648
207+A_327-A	16	99.4	0.000108648
78-GGATCTGTCTACCACCGGGCAAGAAGTGTAACGGATACGTTAACTGTCTTGGTGGTGAGGATGAGTCGGGCTGTGGGATGGATCAGATGCTACGATCGATGTCGCAGCGAGGTGAGGAAGAAAGTGAGGA	15	59.6	0.000101858
74-GGAGGGATCTGTCTACCACCGGGCAAGAAGTGTAACGGATACGTTAACTGTCTTGGTGGTGAGGATGAGTCGGGCTGTGGGATGGATCAGATGCTACGATCGATGTCGCAGCGAGGTGAGGAAGAAAGTGAGGA	15	59	0.000101858
205+GGGTGGTAG	15	97.1	0.000101858
170-CGATCGATGTCGCAGCGAGGTGAGGAAGAAAGTGAGG	15	88.6	0.000101858
116-GTTAACTGTCTTGGTGGTGAGGATGAGTCGGGCTGTGGGATGGATCAGATGCTACGATCGATGTCGCAGCGAGGTGAGGAAGAAAGTGAGG	15	72.3	0.000101858
98-AAGAAGTGTAACGGATACGTTAACTGTCTTGGTGGTGAGGATGAGTCGGGCTGTGGGATGGATCAGATGCTACGATCGATGTCGCAGCGAGGTGAGGAAGAAAGTGAGGA	15	66.3	0.000101858
86-CTACCACCGGGCAAGAAGTGTAACGGATACGTTAACTGTCTTGGTGGTGAGGATGAGTCGGGCTGTGGGATGGATCAGATGCTACGATCGATGTCGCAGCGAGGTGAGGAAGAAAGTGAGGAGGA	15	62.3	0.000101858
207+GGGTAGGAAA	15	96.8	0.000101858
184-GCGAGGTGAGGAAGAAAGTGAGGAG	15	91.3	0.000101858
109-CGGATACGTTAACTGTCTTGGTGGTGAGGATGAGTCGGGCTGTGGGATGGATCAGATGCTACGATCGATGTCGCAGCGAGGTGAGGAAGAAAGTGAGG	15	69.9	0.000101858
34+G_48+A_104-TGT_134-GA_161+TTCGG_174+TTTGTTTTGC	15	48	0.000101858
197-GAAAGTGAGGAGGAG	15	95.2	0.000101858
202-TGAGGA_321-G	15	96.7	0.000101858
205-GGAGGAGG	15	96.7	0.000101858
203-GAG_324-T	15	98.8	0.000101858
157-GGATCAGATGCTACGATCGATGTCGCAGCGAGGTGAGGAAGAAAGTGAGG	15	84.9	0.000101858
69-G	15	99.7	0.000101858
14-G	15	99.7	0.000101858
101-AAGTGTAACGGATACGTTAACTGTCTTGGTGGTGAGGATGAGTCGGGCTGTGGGATGGATCAGATGCTACGATCGATGTCGCAGCGAGGTGAGGAAGAAAGTGAGGA	14	67.2	9.50674e+09
182-CAGCGAGGTGAGGAAGAAAGTGAGGA	14	91	9.50674e+09
146-GGCTGTGGGATGGATCAGATGCTACGATCGATGTCGCAGCGAGGTGAGGAAGAAAGTGAGGAGGAGGGTGGTAGTGCCACACAGAGAGCTTCGGATGTGGATACAAC	14	67.8	9.50674e+09
193-G_203-GAGGAGGA	14	97.3	9.50674e+09
203-GAGGAGGAGGGTGGTAGTGCCACACA	14	92.2	9.50674e+09
200+AGTGAGGAGAGGAGGTTACCCCAGTTGGGGGGCGCGCCCAACTTTGTATAGAAAAGTTGGGTG	14	82.8	9.50674e+09
208+GGGGTAGTGCCACACAGG	14	94.6	9.50674e+09
209+TGGTAGT	14	97.1	9.50674e+09
207+GTGGA	14	98.5	9.50674e+09
152-GGGATGGATCAGATGCTACGATCGATGTCGCAGCGAGGTGAGGAAGAAAGTGAGGAGGA	14	82.2	9.50674e+09
131-GGTGAGGATGAGTCGGGCTGTGGGATGGATCAGATGCTACGATCGATGTCGCAGCGAGGTGAGGAAGAAAGTGAGGA	14	76.8	9.50674e+09
190-TGAGGAAGAAAGTGAGGAGGA	14	93.7	9.50674e+09
13-T	14	98.8	9.50674e+09
221-GCCACAC	14	95.2	9.50674e+09
207+AAAGAA	14	97.3	9.50674e+09
171-GATCGATGTCGCAGCGAGGTGAGGAAGAAAGTGAGGA	14	88.9	9.50674e+09
207+AC	14	99.4	9.50674e+09
52-G	14	99.7	9.50674e+09
202+AAAGCGA	14	95.3	9.50674e+09
200-AGTG	14	98.8	9.50674e+09
144-CGGGCTGTGGGATGGATCAGATGCTACGATCGATGTCGCAGCGAGGTGAGGAAGAAAGTGAGG	13	79.8	8.82768e+09
200+AGTGAGGATAGTATAGAAAAGTTGGGTG	13	92.2	8.82768e+09
46-CTGT_65-ATCTGGGG_123-GTC	13	46.4	8.82768e+09
34+G_54-GGA_106-T_134-GA_161+TTCGG_174+TTTGTTTTGC	13	48.3	8.82768e+09
212+TGGAAGAGAGAGTGAGT	13	92.6	8.82768e+09
186-GAGGTGAGGAAGAAAGTGAGG	13	92.5	8.82768e+09
127-TGGTGGTGAGGATGAGTCGGGCTGTGGGATGGATCAGATGCTACGATCGATGTCGCAGCGAGGTGAGGAAGAAAGTGAG	13	74.7	8.82768e+09
197+AAGTTGG	13	80.5	8.82768e+09
193-GGAAGAAAGTGAGGAGGAGGGTGGTAGTGCCACACAGAGAGCTTCGGATGTGGATACAACGGAAGCTGAGACTACCGTATTGTTCACATC	13	72.9	8.82768e+09
200+AGTTGGGTG	13	97.4	8.82768e+09
192-AGGAAGAAAGT	13	94.6	8.82768e+09
208+T	13	99.4	8.82768e+09
183-AGCGAGGTGAGGAAGAAAGTGAGGAGGA	13	91.6	8.82768e+09
208+GAAAG	13	98.2	8.82768e+09
123-GTCTTGGTGGTGAGGATGAGTCGGGCTGTGGGATGGATCAGATGCTACGATCGATGTCGCAGCGAGGTGAGGAAGAAAGTGAGGA	13	73.5	8.82768e+09
124-TCTTGGTGGTGAGGATGAGTCGGGCTGTGGGATGGATCAGATGCTACGATCGATGTCGCAGCGAGGTGAGGAAGAAAGTGAGGA	13	74.1	8.82768e+09
197-GAAAGTGAG_324-T	13	97	8.82768e+09
88-ACCACCGGGCAAGAAGTGTAACGGATACGTTAACTGTCTTGGTGGTGAGGATGAGTCGGGCTGTGGGATGGATCAGATGCTACGATCGATGTCGCAGCGAGGTGAGGAAGAAAGTGAGGA	12	63.9	8.14863e+09
234-CTTCGGAT_298+A_311-GA	12	48.4	8.14863e+09
205-GGAGGAGGGTGGTAGTGCCACACAGAGAGCTTCGGATGTGGATACAACGGAAGCTGAGACTACCGTATTGTTCACATC	12	76.5	8.14863e+09
114-ACGTTAACTGTCTTGGTGGTGAGGATGAGTCGGGCTGTGGGATGGATCAGATGCTACGATCGATGTCGCAGCGAGGTGAGGAAGAAAGTGAGGA	12	71.7	8.14863e+09
74-GGAGGGATCTGTCTACCACCGGGCAAGAAGTGTAACGGATACGTTAACTGTCTTGGTGGTGAGGATGAGTCGGGCTGTGGGATGGATCAGATGCTACGATCGATGTCGCAGCGAGGTGAGGAAGAAAGTGAGG	12	59.3	8.14863e+09
208+AAGTGAGGAAAG	12	95.1	8.14863e+09
180-CGCAGCGAGGTGAGGAAGAAAGTGAGG	12	91	8.14863e+09
206+GACAGGTACAGTTCAGGT	12	94.9	8.14863e+09
204+CGCC	12	90.5	8.14863e+09
205+CATCGATGAGGAAGAAAGCGAGGTGAGGAAG	12	91.2	8.14863e+09
201+CAACTTTATTATACAAAGTTGTGGCGCGCCCCCCAACTGGGGTAACCTTTGGGCTCCCCGGGCGCGTACTCCACCTCTGGCGTCC_210-A	12	77.7	8.14863e+09
201+CAACTTT_229+ACTGGG_237+TGGGCTCCCCGGGCG	12	85	8.14863e+09
204-AGGAGGAGGGTGGT	12	95.8	8.14863e+09
207+TAGAAA	12	97.9	8.14863e+09
201-GTGAGGAGGAGGGTGGTAGTG_269-GT	12	84.3	8.14863e+09
119-AACTGTC_158-GATCAGATGCTACGATCGATGTCGCAGCGAGGTGAGGAAGAA	12	80.1	8.14863e+09
201-GTGAGGAGGAG	12	96.4	8.14863e+09
208+GTAGTGCCACACAGAGTGCACTAAGTAGTGG	12	91.5	8.14863e+09
205+GGT	12	98.8	8.14863e+09
147-GCTGTGGGATGGATCAGATGCTACGATCGATGTCGCAGCGAGGTGAGGAAGAAAGTGAGGA	12	81.6	8.14863e+09
200+ACAACTTTATTATACAAAGTTGTGGCGCGCCCCCCAACTGGGGTAACCTGCGTTGGGTG	12	84.7	8.14863e+09
200+AGTGAGGAAAAGTTGGGTG	12	94.3	8.14863e+09
204+AAAAA	12	98.2	8.14863e+09
161-CAGATGCTACGATCGATGTCGCAGCGAGGTGAGGAAGAAAGTGAGGA	12	84.9	8.14863e+09
206-GA_323-G	12	98.8	8.14863e+09
207-A_323-G	12	99.4	8.14863e+09
199-AAGTGAGG_324-T	12	97.3	8.14863e+09
197-GAAAGT	12	98.2	8.14863e+09
185+C_225+TTCATGGCCGGTG_296+T_322+GATTTTGTTTTGCTGT	11	43.2	7.46958e+09
118-TAACTGTCTTGGTGGTGAGGATGAGTCGGGCTGTGGGATGGATCAGATGCTACGATCGATGTCGCAGCGAGGTGAGGAAGAAAGTGAGGA	11	71.7	7.46958e+09
200+AGTGAGGTGGAGTACGCGCCCGGGGAGCCCAAAGGTTACCCCAGTTGGGGGGCGCGCCCAACTTTGTATAGAAAAGTTGGGTG	11	78.8	7.46958e+09
208+TCGAAGAAAGTGAGCACAAC	11	94.3	7.46958e+09
208+GTTTTAAGTGT	11	96.8	7.46958e+09
44+TC_125+GGCA_134+CCTTTGTAC_160-TC_175-G	11	46.5	7.46958e+09
151-TGGGATGGATCAGATGCTACGATCGATGTCGCAGCGAGGTGAGGAAGAAAGTGAGGA	11	82.8	7.46958e+09
208+TGGT	11	98.8	7.46958e+09
207+GTGGTCCTGCGA	11	94.8	7.46958e+09
208-GGAGGGTGGTAGTGCCACACAGAGAGCTTCG_248-ACA	11	88.9	7.46958e+09
144-CGGGCTGTGGGATGGATCAGATGCTACGATCGATGTCGCAGCGAGGTGAGGAAGAAAGTGAG	11	81	7.46958e+09
206+TGAGGT	11	98.2	7.46958e+09
58-GCGATGTATCTGGGGTGGAGGGATCTGTCTACCACCGGGCAAGAAGTGTAACGGATACGTTAACTGTCTTGGTGGTGAGGATGAGTCGGGCTGTGGGATGGATCAGATGCTACGATCGATGTCGCAGCGAGGTGAGGAAGAAAGTG	11	53.9	7.46958e+09
206+GAGT	11	98.5	7.46958e+09
199+GCCCAAAGGTTACCCCAGTTGGGGGGCGCGCCCAACTTTGTATAGAAAAGTTGGGT	11	84.3	7.46958e+09
208+GTGAG	11	98.5	7.46958e+09
208+AGAAAGT	11	97.9	7.46958e+09
200+AGCAACGGGGGGCGCGCCCAACTTTGTATAGAAAAGTTGGGTG	11	87.5	7.46958e+09
321-GT	11	99.4	7.46958e+09
20+G_48+G_104-TGT_134-GA_161+TTCGG_174+TTTGTTTTGC	10	47.1	6.79053e+09
65-ATCTGGGGTGGAGGGATCTGTCTACCACCGGGCAAGAAGTGTAACGGATACGTTAACTGTCTTGGTGGTGAGGATGAGTCGGGCTGTGGGATGGATCAGATGCTACGATCGATGTCGCAGCGAGGTGAGGAAGAAAGTGAGG	10	56	6.79053e+09
108-ACGGATACGTTAACTGTCTTGGTGGTGAGGATGAGTCGGGCTGTGGGATGGATCAGATGCTACGATCGATGTCGCAGCGAGGTGAGGAAGAAAGTGAGG	10	70.2	6.79053e+09
184-GCGAGGTGAGGAAGAAAGTGAGG	10	93.1	6.79053e+09
201+CAACTTTATTATACAAAGTTGTGGCGCGCCCCCCAACTGGGGTAACCTTTGGGCTCCCCGGGC	10	82.5	6.79053e+09
206+CCACTGCCAGCACGTACTGC	10	82.2	6.79053e+09
102-AGTGTAACGGATACGTTAACTGTCTTGGTGGTGAGGATGAGTCGGGCTGTGGGATGGATCAGATGCTACGATCGATGTCGCAGCGAGGTGAGGAAGAAAGTGAGGAG	10	67.8	6.79053e+09
122-TGTCTTGGTGGTGAGGATGAGTCGGGCTGTGGGATGGATCAGATGCTACGATCGATGTCGCAGCGAGGTGAGGAAGAAAGTGAG	10	73.2	6.79053e+09
174-CGATGTCGCAGCGAGGTGAGGAAGAAAGTGAGG	10	89.5	6.79053e+09
210-A	10	98.5	6.79053e+09
206+CCACTGCCA	10	89.5	6.79053e+09
320-A	10	99.7	6.79053e+09
203-GAGGA_324-T	10	97.3	6.79053e+09
30-G_54-GGA_68-TGGG_87-TACCACCGGGCA_119-AACTGTC_152-G_230+GT_295-GACGTTAAGCG	10	45.5	6.79053e+09
10-A_200-AGTGAGG	10	97.6	6.79053e+09
169-ACGATCGATGTCGC_191-GAGGAAGAAAGTGAGG	10	89.5	6.79053e+09
200-AGTGAGG_329-G	10	97.6	6.79053e+09
133-T	10	99.1	6.79053e+09
123-GTCTTGGTGGTGA_248-ACAA_273-TGTTCACA_314+TTTTGT	9	41.9	6.11147e+09
150-GTGGGATGGATCAGATGCTACGATCGATGTCGCAGCGAGGTGAGGAAGAAAGTGAGGAG	9	81	6.11147e+09
119-AACTGTCTTGGTGGTGAGGATGAGTCGGGCTGTGGGATGGATCAGATGCTACGATCGATGTCGCAGCGAGGTGAGGAAGAAAGTGAGGA	9	72	6.11147e+09
206+C	9	93.8	6.11147e+09
181-GCAGCGAGGTGAGGAAGAAAGTGA	9	91	6.11147e+09
206+GAGTAGTAGTAGGAGTAGTAGGAAGAAAGT	9	91.7	6.11147e+09
34+G_48+G_89+G_110+ATTTCATTAGTGT_155-A_174-CGA	9	47.8	6.11147e+09
200+AGTGAGGGTCCCATGGGTGAGGTGGAGTACGCGCCCGGGGAGCCCAAAGGTTACCCCAGTTGGGGGGCGCGCCCAACTTTGTATAGAAAAGTTGGGTG	9	77.2	6.11147e+09
207-AGGAGGGTGGT	9	96.7	6.11147e+09
206+GAAGAAAGT	9	95.9	6.11147e+09
204+CCACAGGAGGGTGGTGCT	9	94	6.11147e+09
77-GG_136-GG	9	48.7	6.11147e+09
207+GTGGT	9	97.6	6.11147e+09
140-GAGTCGGGCTGTGGGATGGATCAGATGCTACGATCGATGTCGCAGCGAGGTGAGGAAGAAAGTGAGGA	9	78.3	6.11147e+09
202-TGAGGA_325-A	9	97.6	6.11147e+09
196-AGAAAGTGAGGAGGAGGGTGGT	9	92.8	6.11147e+09
207+tggtaggaaagaaaggaagaaaggaagaaaggaagaaaggagaa	9	87.2	6.11147e+09
189-GTGAGGAAGAAAGTGAGGAGGA	9	93.4	6.11147e+09
199-AAGTGAGG_323-G	9	97.3	6.11147e+09
199-AAGTGAGGAG	9	97	6.11147e+09
207+A_329-G	9	99.4	6.11147e+09
207+GAAGAAA	8	97.6	5.43242e+09
181-GCAGCGA_198-A	8	93.7	5.43242e+09
20-CTGCCAGCACGTACTGC_60-GATGT_113-TACGTTAACTGTCTTGGTGGTG_222-CCA	8	40.2	5.43242e+09
20-CTG_45+CATCA_104-TGT_134-GA_161+TTCGG_174+TTTGTTTTGC	8	46.9	5.43242e+09
17+C_34+G_74-GGA_103-GTGT_119-AACTGTCTTGGTGGTGAGGATGAGTCGG	8	46.2	5.43242e+09
206+CCACTGCCAGCACGT	8	85.4	5.43242e+09
177-TGTCGCAGCGAGGTGAGGAAGAAAGTGAGG	8	89.5	5.43242e+09
181-GCAGCGAGGTGAGGAAGAAAGTGAGGAGG	8	90.4	5.43242e+09
200+AGTGAGTTTGTATAGAAAAGGTGAGGCGAGGTGAGGAAGTGACTTTGTATAGAAAAGTTGGGTG	8	83.1	5.43242e+09
72-GTGGAGGGATCTGTCTACCACCGGGCAAGAAGTGTAACGGATACGTTAACTGTCTTGGTGGTGAGGATGAGTCGGGCTGTGGGATGGATCAGATGCTACGATCGATGTCGCAGCGAGGTGAGGAAGAAAGTGAGGA	8	58.1	5.43242e+09
67+AATTG_142-GTCG_186-GAGGTGAGGA	8	43.6	5.43242e+09
207-AGGAGGGTGGTAGTGCCACACAGAGAGCTTCGGATGTGGATACAACGGAAGCTGAGACTACCGTATTGTTCACATCGGAAGAAACGACGACGTTA	8	70.8	5.43242e+09
204-AGGAGGAGGGTGGTAGTGC	8	93.1	5.43242e+09
207+TA	8	97.6	5.43242e+09
115-CGTTAACTGTCTTGGTGGTGAGGATGAGTCGGGCTGTGGGATGGATCAGATGCTACGATCGATGTCGCAGCGAGGTGAGGAAGAAAGT	8	71.7	5.43242e+09
201+CAACTTTATTATACAAAGTTGTGGCGCGCCCCCCAACTGGGGTAACCTTT_229+CCCATGC_241-TGTG	8	77.1	5.43242e+09
198-AAAGTGA	8	96.7	5.43242e+09
160-TCAGATGCTACGATCGATGTCGCAGCGAGGTGAGGAAGAAAGTGAGGAGGAGGGTGG	8	81.6	5.43242e+09
205+AAGT	8	98.5	5.43242e+09
195-AAGAAAGTGAGGA_323-G	8	95.8	5.43242e+09
207+TGAGGAAGAA	8	95.9	5.43242e+09
200-AGTGAGGAGGAGG	8	94.9	5.43242e+09
203-GAGG_323-G	8	98.5	5.43242e+09
200-AGTGAGG_324-T	8	97.6	5.43242e+09
9+T	8	99.7	5.43242e+09
43+AT_125+GGCACTTGTTGCTC_155-A	7	44	4.75337e+09
208-GGAGGGTGG	7	96.1	4.75337e+09
240+GGATT_257-G_314+TCGATACGACT	7	44	4.75337e+09
21-TGCCA_51+TCA_66+CAAAC_76-AGGGATCTGTCTA_142-GTCGGGCTGTGGGATGGATCAGATGCT_220-TGCCACA	7	42.1	4.75337e+09
206+GCTGGTGGAGTGAGGTGAGGTGGAGGTGGAAGCGAGGTGGAAGAAAGTGAGGT	7	85.2	4.75337e+09
65-ATCTGGGGTGGAGGGATCTGTCTACCACCGGGCAAGAAGTGTAACGGATACGTTAACTGTCTTGGTGGTGAGGATGAGTCGGGCTGTGGGATGGATCAGATGCTACGATCGATGTCGCAGCGAGGTGAGGAAGAAAGTGAGGA	7	56.9	4.75337e+09
122-TGTCTTGGTGGTGAGGATGAGTCGGGCTGTGGGATGGATCAGATGCTACGATCGATGTCGCAGCGAGGTGAGGAAGAAAGTGAGG	7	74.4	4.75337e+09
200+AGTGCCCAAAGGTTACCCCAGTTGGGGGGCGCGCCCAACTTTGTATAGAAAAGTTGGGTG	7	84.4	4.75337e+09
203-GAGGA_323-G	7	98.2	4.75337e+09
114-ACGTTAACTGTCTTGGTGGTGAGGATGAGTCGGGCTGTGGGATGGATCAGATGCTACGATCGATGTCGCAGCGAGGTGAGGAAGAAAGTGAGG	7	70.8	4.75337e+09
196-AGAAAGTGAGGAGGAGGGTGGTAGTGCCACAC	7	89.2	4.75337e+09
21+G_68-TGGG_83-TGTCT_174+GA	7	48.9	4.75337e+09
82-CTGTCTACCACCGGGCAAGAAGTGTAACGGATACGTTAACTGTCTTGGTGGTGAGGATGAGTCGGGCTGTGGGATGGATCAGATGCTACGATCGATGTCGCAGCGAGGTGAGGAAGAAAGTGAGGA	7	61.4	4.75337e+09
203+CGTAGTGCGTAGCGA	7	95.1	4.75337e+09
157-GG_179-TCGCAGCGAGGT	7	83.5	4.75337e+09
207+CACGCTTGT	7	96.2	4.75337e+09
119-AACTGTCTTGGTGGTGAGGATGAGTCGGGCTGTGGGATGGATCAGATGCTACGATCGATGTCGCAGCGAGGTGAGGAAGAAAGTGAGG	7	72.9	4.75337e+09
7-G_207+A	7	99.4	4.75337e+09
200+AAAGTTGGGTG	7	96.5	4.75337e+09
207-AGGAGGGTGGTAGT	7	94.3	4.75337e+09
200+AGTGAGGGTATAAAGGGGAAGTTGGGTG	7	91.1	4.75337e+09
157-GGATCAGATGCTACGATCGATGTCGCAGCGAGGTGAGGAAGAAAGTGA	7	85.5	4.75337e+09
204+AGGACGGTGGT	7	96.8	4.75337e+09
198-AAAGTGAGGA_326-G	7	96.7	4.75337e+09
196-AGAAAGTGAGGAGGAGG	7	94	4.75337e+09
10-A_198-AAAGTGAGGA	7	95.8	4.75337e+09
10-A_203-GAG	7	98.8	4.75337e+09
74-G	7	99.7	4.75337e+09
204-AGGA_323-G	7	97.6	4.75337e+09
207-A_325-A	7	99.4	4.75337e+09
204-AGGA_324-T	7	97.6	4.75337e+09
47+AGCGA_55-GAT_102+TTTC_175+TCGCCTGTTCG	6	46.4	4.07432e+09
20-CT_93+GTCTTCGCGTT	6	49.6	4.07432e+09
34+G_48+G_104-T_125+TGGCA_134+CCTTTGTAC_171-GAT	6	48.3	4.07432e+09
90-CACCGGGCAAGAAGTGTAACGGATACGTTAACTGTCTTGGTGGTGAGGATGAGTCGGGCTGTGGGATGGATCAGATGCTACGATCGATGTCGCAGCGAGGTGAGGAAGAAAGTGAGGA	6	64.5	4.07432e+09
203-GAG_326-G	6	97.6	4.07432e+09
199+AATGAGGAAG	6	96.2	4.07432e+09
201+CAACTTTATTATACAAAGTTGTGGCGCGCCCCCCAACTGGGGTAACCTTTGGGCTCCCCGGGCGCGTACTCCACCTCACCCATGCGATCGCTCCGGAAAGATACATTGATGAGTTTGGACAAACC	6	71.1	4.07432e+09
200+AGTGAGGAAGAATAGAAAAGTTGGGTG	6	92.5	4.07432e+09
178-GTCGCAGCGAGGTGAGGAAGAAAGTGAGG	6	90.4	4.07432e+09
53-GGGATGCGATGTATCTGGGGTGGAGGGATCTGTCTACCACCGGGCAAGAAGTGTAACGGATACGTTAACTGTCTTGGTGGTGAGGATGAGTCGGGCTGTGGGATGGATCAGATGCTACGATCGATGTCGCAGCGAGGTGAGGAAGAAAGTGAGGA	6	53.3	4.07432e+09
205+CT	6	97.3	4.07432e+09
160-TCAGATGCTACGATCGATGTCGCAGCGAGGTGAGGAAGAAAGTGAGG	6	85.8	4.07432e+09
195-AAGAAAGT	6	96.1	4.07432e+09
200+AGTGAGTACGCGCCCGGGGAGCCCAAAGGTTACCCCAGTTGGGGGGCGCGCCCAACTTTGTATAGAAAAGTTGGGTG	6	80.2	4.07432e+09
206+AAAGA	6	96.7	4.07432e+09
24-CAGCA_49+C_60-GATGTA_112-ATACGTTA_145-GG_247-T_259-TGAGA_276-TC	6	49	4.07432e+09
178-GTCGCAGCGAGGTGAGGAAGAAAGTGA	6	90.1	4.07432e+09
10-A_203-GAGGA	6	98.2	4.07432e+09
204+AAAGAA	6	97.6	4.07432e+09
10+A	6	99.7	4.07432e+09
324-TA	6	98.5	4.07432e+09
199-AAGTGAGG_327-A	6	97.3	4.07432e+09
206-GA_324-T	6	99.1	4.07432e+09
10-A_199-AAGTGAGG	6	97.3	4.07432e+09
15-C	6	98.8	4.07432e+09
222-C	6	99.7	4.07432e+09
198-AAAGTGAGGA_324-T	6	96.1	4.07432e+09
205-GG_323-G	6	99.1	4.07432e+09
203-G	6	99.7	4.07432e+09
94-G_202-TGAGGA	6	97.9	4.07432e+09
223-CA	6	99.4	4.07432e+09
203-GA	6	98.2	4.07432e+09
323-GTA	6	99.1	4.07432e+09
197-GAAAGTGAG_326-G	6	96.4	4.07432e+09
34-T_125+GGCA_134+CCTTTGTAC_174-CGA	5	45	3.39526e+09
34+G_48+G_104-TGT_136-GG_161+TTCGG_174+TTTGTTTTGC	5	47.1	3.39526e+09
207+GGTAGT	5	96.7	3.39526e+09
126-TTGGTGGTGAGGATGAGTCGGGCTGTGGGATGGATCAGATGCTACGATCGATGTCGCAGCGAGGTGAGGAAGAAAGTGAGGA	5	74.4	3.39526e+09
208+gggggtgggtcaggggg	5	94.3	3.39526e+09
206-GAGGAGGGTGGTAGTGCCACACAGAGAGCTTCGGATGTGGATACAACGGAAGCTGAGACTACCGTA	5	80.1	3.39526e+09
209+GTGGTAGTGCCACACAGA	5	94.9	3.39526e+09
209+TGGTAGTGCCACACA	5	95.4	3.39526e+09
200+AGTGAGGACGTGGGGACGCGACCCATGGGTGAGGTGGAGTACGCGCCCGGGGAGCCCAAAGGTTACCCCAGTTGGGGGGCGCGCCCAACTTTGTATAGAAAAGTTGGGTG	5	75.1	3.39526e+09
206+GAGTAGAGGAAGAGGT	5	94.5	3.39526e+09
204+CGCCACTGCCAGCACGT	5	83.8	3.39526e+09
124-TCTTGGT_186-G_208-GGAGGGTGGTAGT_266-ACCG_299+GT_315+TT	5	44.9	3.39526e+09
128-GGTGGTGAGGATGAGTCGGGCTGTGGGATGGATCAGATGCTACGATCGATGTCGCAGCGAGGTGAGGAAGAAAGTGAGGA	5	75.9	3.39526e+09
208-GGAGGGTGGTAGTGCCACACAGAGAGCTTCGGATGTGGATACAAC	5	85.2	3.39526e+09
13-T_200-AGTGAGG	5	97.6	3.39526e+09
206+AAGAAAGTGAGGT	5	95.1	3.39526e+09
207+AGAAAGGA	5	96.8	3.39526e+09
197-GAAAGTGAGG_323-G	5	95.5	3.39526e+09
198-AAAGTGAGGA_325-A	5	96.7	3.39526e+09
191-GAGGAAGAAAGTGAGG_327-A	5	94.9	3.39526e+09
14-G_191-GAGGAAGAAAGTGAG	5	95.2	3.39526e+09
191-GAGGAAGAAAGTGAG_326-G	5	95.2	3.39526e+09
205-G_323-G	5	99.4	3.39526e+09
203-GAG_325-A	5	97.6	3.39526e+09
20+GGAATCAGCCT_33+AGC_91-ACCGGGCAAGAAGTGTAACG_143+GATT	5	47.9	3.39526e+09
7+G	5	99.7	3.39526e+09
203-GAGGAG_324-T	5	97.9	3.39526e+09
125-CTTGGTGGTGAGGATGAGTCGGGCTGTGGGATGGATCAGATGCTACGATCGATGTCGCAGCGAGGTGAGGAAGAAAGTGAGG	5	75	3.39526e+09
210+C	5	97.9	3.39526e+09
196-AGAAAGTGAGG_324-T	5	96.4	3.39526e+09
107-A	5	99.7	3.39526e+09
288-A	5	99.7	3.39526e+09
187-AGGTGAGGAAGAAAGTGAGGA	5	93.4	3.39526e+09
206-GA_327-A	5	98.2	3.39526e+09
107-AACGGATACGTTAACTGTCTTGGTGGTGAGGATGAGTCGGGCTGTGGGATGGATCAGATGCTACGATCGATGTCGCAGCGAGGTGAGGAAGAAAGTGAGGAG	5	69	3.39526e+09
206+GAAAGT	5	98.2	3.39526e+09
207+AAAATC	5	98.2	3.39526e+09
197-GAAAGTGAGG_324-T	5	96.7	3.39526e+09
199-AAGTGAGG_326-G	5	97.3	3.39526e+09
199-AAGTGAGG_329-G	5	96.1	3.39526e+09
10-A_206-GA	5	98.5	3.39526e+09
7-G_203-GAGGAG	5	97.9	3.39526e+09
207+A_325-A	5	97.9	3.39526e+09
198-AAAGTGAGGA_323-G	5	96.7	3.39526e+09
152-G	5	99.7	3.39526e+09
157-G	5	99.7	3.39526e+09
193-GGAAGAAAGTG	5	96.4	3.39526e+09
195-A	5	99.7	3.39526e+09
73-T	5	99.4	3.39526e+09
196-AGAAAGTG	5	97.6	3.39526e+09
264-C	5	93.1	3.39526e+09
208+CATTGAGCTGGTGGAAAACTTTGGCGATGATTACGATTGGCCCTGGAATACGAACATCTATCTCGATGGAGTAATGATC	4	80.8	2.71621e+09
208+GTATCATGGAGGGTGGTAGTGCCACACACTTTATCAT	4	89.2	2.71621e+09
199-AAGTGAGG_325-A	4	97.3	2.71621e+09
25-AGCA_65+CCAGCACGCG_83+CACGCGGTCA_115-CGTTAACTGT_244+ATGGC_279+TCGGAGTCCGTTTC	4	42	2.71621e+09
204+CGCCACTGCCAGT	4	86.5	2.71621e+09
208+ATCAGACGCC	4	96.8	2.71621e+09
205+GGGTGGAG	4	95.9	2.71621e+09
200+AGTGAGGAGCCCAAAGGTTACCCCAGTTGGGGGGCGCGCCCAACTTTGTATAGAAAAGTTGGGTG	4	83.4	2.71621e+09
85-TC_128-GGTG_177-TG_220-T_257+GGTACTGTGT_287+AGCAT_304+ACATT	4	45.9	2.71621e+09
28+TG_54+CGTGTCGTAC_141+T_176+TGCGA	4	47.8	2.71621e+09
58-GCGATGTATCTGGGGTGGAGGGATCTGTCTACCACCGGGCAAGAAGTGTAACGGATACGTTAACTGTCTTGGTGGTGAGGATGAGTCGGGCTGTGGGATGGATCAGATGCTACGATCGATGTCGCAGCGAGGTGAGGAAGAAAGTGAGGAGGA	4	52.7	2.71621e+09
195-AAGAAAGTGAGGA_329-G	4	95.8	2.71621e+09
206+CGTGGTAC	4	97.4	2.71621e+09
200+AGGTTACCCCAGTTGGGGGGCGCGCCCAACTTTGTATAGAAAAGTTGGGTG	4	86.7	2.71621e+09
34+G_48+G_104-TGT_134-GA_164+GGTGT_174+TTTGTTTTGC	4	47.5	2.71621e+09
29+TGTCTTAAGTGTC_77+T_98-A	4	52	2.71621e+09
52-GGGGATGCGATGTATCTGGGGTGGAGGGATCTGTCTACCACCGGGCAAGAAGTGTAACGGATACGTTAACTGTCTTGGTGGTGAGGATGAGTCGGGCTGTGGGATGGATCAGATGCTACGATCGATGTCGCAGCGAGGTGAGGAAGAAAGTGAGG	4	53.3	2.71621e+09
20-CT_34+G_48+G_104-TGT_134-GA_161+TTCGG_174+TTTGTTTTGC	4	48.5	2.71621e+09
200+AGTGAGAAAGAAAAGTTGGGTG	4	93.2	2.71621e+09
203-GAGGA_329-G	4	98.2	2.71621e+09
235-T	4	98.8	2.71621e+09
204+TTGGTA	4	97.6	2.71621e+09
201+CAACTTTATTATACAAAGTTGTGGCGCGCCCCCCAACTGGGGTAACCTTTGGGCTCCCCGGGCGCGTAACCTTTGGGCT	4	79.1	2.71621e+09
202-TGAGGA_320-A	4	96.7	2.71621e+09
207+AAAGGC	4	98.2	2.71621e+09
203+GGAGCGA	4	97.3	2.71621e+09
34+G_48+G_125+GGCA_134+CCTTTGTACGCAA_152+A_174-CGA	4	46.9	2.71621e+09
173-TCGAT_187-AGGTGAGGAAGAAAGTGAGGA	4	91.6	2.71621e+09
202-TGAGGA_321-GT	4	96.4	2.71621e+09
163-GATGCTACGAT_192-AGGAAGAAAGTGAGGA	4	88	2.71621e+09
207+AGTAGT	4	97.3	2.71621e+09
202-TGAGGA_323-GTA	4	96.1	2.71621e+09
205-G_325-A	4	99.4	2.71621e+09
208+GCACTGGGAAT	4	96.8	2.71621e+09
203-GAG_327-A	4	98.8	2.71621e+09
167-CTACGATCGATGTCGCAGCGAGGTGAGGAAGAAAGTGAGGA	4	87.7	2.71621e+09
10-A_204-AGGA	4	98.2	2.71621e+09
204+ACACAGTGAGGAGGGTGGTAGTGCCACCTCA	4	91.2	2.71621e+09
327+A	4	99.7	2.71621e+09
50+C	4	99.1	2.71621e+09
196-AGAAAGTGAGG_323-G	4	96.1	2.71621e+09
119-A	4	99.4	2.71621e+09
201-GTGAGG_324-T	4	97.9	2.71621e+09
203-GAGGAG_326-G	4	97.9	2.71621e+09
211-G	4	99.7	2.71621e+09
10-A_193-GGAAGAAAGTGAGG	4	95.5	2.71621e+09
189-GTGAGGAAGAAAGTGAGGA_323-G	4	93.1	2.71621e+09
200+AGTGAGGACTTTGTATAGAAAAGTTGGGTG	4	91.7	2.71621e+09
197-GAAAGTGAG_329-G	4	97	2.71621e+09
193-GGAAGAAAGTGAG_323-G	4	95.8	2.71621e+09
69-G_189-GTGAGGAAGAAA	4	94.9	2.71621e+09
200-AGT	4	97	2.71621e+09
208+GTGGT	4	97	2.71621e+09
207-A_324-T	4	99.4	2.71621e+09
201-GTGAG_326-G	4	97.9	2.71621e+09
215-G	4	99.7	2.71621e+09
199-AAGT	4	98.5	2.71621e+09
69-G_202-TGAGGA	4	97	2.71621e+09
201-GTGAGGAGGAGGGTGGTAGT	4	92.5	2.71621e+09
10-A_188-GGTGAGGAAGAAAGTGAG	4	94	2.71621e+09
206+GACTTTCAGTGAGGAAAGT	4	93.4	2.71621e+09
199-AAGTGAG	4	97.9	2.71621e+09
202-TGAGGA_271-A	4	97.6	2.71621e+09
317-GC	4	97.6	2.71621e+09
207+AAAGTA	4	97.9	2.71621e+09
200-AGTGAGG_326-G	4	97.3	2.71621e+09
191-GAGGAAGAAAGTG	4	95.5	2.71621e+09
188-GGTGAGGAAGAAAGT	4	94	2.71621e+09
206+T	4	98.8	2.71621e+09
169-ACGATCGATGTCGCAGCGAGGTGAGGAAGAAAGTG	4	88.9	2.71621e+09
207+AAGAGC	4	97.9	2.71621e+09
211-GGG	4	98.2	2.71621e+09
16-GCCACT_54+ATT_139-TG_163-G_169-ACGA	3	49.5	2.03716e+09
195+AAGAAAGTGTTCC	3	94.2	2.03716e+09
124-TCTTGGT_186-G_220-TGCCA_259-TGAG_313+TTTCGGTGTATGCGTGGATTTTG	3	42.7	2.03716e+09
206-GA_321-G	3	97.9	2.03716e+09
20-CTG_78+A_114-AC_153+TACGTAATAGATTTCGGTGTAT_174-CGA	3	44.3	2.03716e+09
204-AGGA_323+G	3	97	2.03716e+09
124-TCTTGGT_186-G_209-GAGGGTGGT_233+TTGCAC_275-TT_301-AAGCGTGCCGG	3	43.7	2.03716e+09
10-A_181-GCAGCGAGGTGAGGAAGAAAGTGAG	3	91.3	2.03716e+09
49-TCCGGGGAT_125+G	3	50	2.03716e+09
207+GTGGAAGA	3	96.2	2.03716e+09
161-CAGATGC_192-AGGAAGAA	3	91	2.03716e+09
196-AGAAAGTGAGG_321-GT	3	94.9	2.03716e+09
202-TGAGGA_301-A	3	96.7	2.03716e+09
200+ACAACTTTATTATACAAAGTTGTGGCGCGCCCCCCAACTGGGTGGGTGAAAAGTTGGGTG	3	83.4	2.03716e+09
196-AGAAAGTGAGG_301-A	3	96.1	2.03716e+09
131-G	3	98.5	2.03716e+09
200+AGTGAGTTATCAACTTGAAAAAGTGGCACCGAGTCGGTGCttttttttACGCGTGGGTCCCATGGGTGAGGTGGAGTACGCGCCCGGGGAGCCCAAAGGTTACCCCAGTTGGGGGGCGCGCCCAACTTTGTATAGAAAAGTTGGGTG	3	68.5	2.03716e+09
50+C_196-AGAAAGTGAGG	3	95.8	2.03716e+09
197-GAAAGTGAGG_318+C	3	95.8	2.03716e+09
76-AGGGATCTGTCTACCACCGGGCAAGAAGTGTAACGGATACGTTAACTGTCTTGGTGGTGAGGATGAGTCGGGCTGTGGGATGGATCAGATGCTACGATCGATGTCGCAGCGAGGTGAGGAAGAAAGTGAGGA_324-T	3	59.9	2.03716e+09
205+G_324-T	3	98.2	2.03716e+09
10-A_189-GTGAGGAAGAAA	3	94.9	2.03716e+09
144-CGGGCTGTGGGATGGATCAGATGCTACGATCGATGTCGCAGCGAGGTGAGGAAGAAAGTGAG_324-T	3	79.8	2.03716e+09
208+CATTTTAATAAGCACAAATTTGGTTATTTTTTCTCTTTTGTTGTTATACAATAATCAAATATTATTATAATTTTAGATAACATATATAAGATTTTGCACAAAACAAGTG	3	73.7	2.03716e+09
205-GG_329-G	3	99.1	2.03716e+09
207+AAGAA_326-G	3	97	2.03716e+09
37-GCG_70+CC_97-CAAGAAGT_221+CCGGG_295-GA	3	44	2.03716e+09
206+GACTCGCGT	3	97.4	2.03716e+09
208+GGGT	3	97.3	2.03716e+09
33-CT_50-CC_81+CCGCCACCT_120-ACTGTCT_163-GATG_217-T	3	45.9	2.03716e+09
50+C_197-GAAAGTGAG	3	96.4	2.03716e+09
196-AGAAAGTGAGG_329-G	3	96.1	2.03716e+09
34+G_48+G_125+GGCA_134+CCTTTGTAC_174-CGA	3	46.5	2.03716e+09
243-T	3	98.2	2.03716e+09
194-GAAGAAAGTGAGGA_323-G	3	95.2	2.03716e+09
207+GGAAA	3	97.9	2.03716e+09
200-AGTGAGG_325-A	3	96.7	2.03716e+09
9-T_171-GATCGATGTCGCAGCGAGGTGAGGAAGAAAGTGAG	3	87.9	2.03716e+09
195-AAGAAAGTGAGGA_327-A	3	94.6	2.03716e+09
201-GTGAG_324-TA	3	97.9	2.03716e+09
199-AAGTGAGG_322-T	3	97.3	2.03716e+09
206+GGTGGTA	3	97.6	2.03716e+09
208-GGAGG_323-G	3	97	2.03716e+09
37+CACAGCGTGTG_56+AGTACTGTC_96+CT_146+TAAGCGAC_151+CCACCACA_270+CCGC_311-GAAGA	3	44.1	2.03716e+09
136-G	3	98.5	2.03716e+09
199-AAGTGAGG_324-TA	3	95.8	2.03716e+09
200-AGTGAGG_321-G	3	97.6	2.03716e+09
36+ATGCCCA_72+CGTC_131+C_179-TCGCAGCGAGGTGA	3	46.9	2.03716e+09
197+CT	3	88.5	2.03716e+09
31-TACTGCGCGGGCTGACTGTC_85-TCTA_113+GG_160+AG_176+C_235-TT_255-AA_277-CA	3	46.9	2.03716e+09
13-T_197-GAAAGTGAG	3	95.2	2.03716e+09
180-CGCAGCGAGGTGAGGAAGAAAGTGAGGA_323-G	3	90.4	2.03716e+09
7-G_202-TGAGGA_324-T	3	96.4	2.03716e+09
192-AGGAAGAAAGTGAGGA_327-A	3	94.9	2.03716e+09
191-GAGGAAGAAAGTGAGGA_323-G	3	93.4	2.03716e+09
201-GTGAGG_327-A	3	96.7	2.03716e+09
230-AGA_247-TACAACGG_277+TATGTTTTCA_303-GCGTGC	3	50.4	2.03716e+09
188-GGTGAGGAAGAAAGTGAG_324-T	3	93.4	2.03716e+09
98-A	3	98.8	2.03716e+09
207+C	3	98.8	2.03716e+09
209+TTGGTAGAAAGTGA	3	94.8	2.03716e+09
181-GCAGCGAGGTGAGGAAGAAA	3	91.3	2.03716e+09
208+ACGTTTGAGGACGTGTTTTAGTATTTCCTGAATAAAATTACCATTTTTCGAAAACTGCTCGTCAAGCACGGGGTTTACTTTATTATGTTTTGTTTGCGGCCCAACCCGCTC	3	73.8	2.03716e+09
208+CACAG	3	97.3	2.03716e+09
201-GTGAGG_323-G	3	97.6	2.03716e+09
197-GAAAGTGAGGAG_324-T	3	96.1	2.03716e+09
200-AGTGAGG_322-T	3	96.1	2.03716e+09
194-GAAGAAAGTGAGGAGGA_324-T	3	92.8	2.03716e+09
207+GAA	3	96.7	2.03716e+09
106-T	3	98.8	2.03716e+09
205-GG_324-T	3	97.6	2.03716e+09
196-AGAAAGTGAGG_327-A	3	95.2	2.03716e+09
195-AAGAAAGTGAGGA_326-G	3	94.6	2.03716e+09
107-AACGGATACGTTAACTGTCTTGGTGGTGAGGATGAGTCGGGCTGTGGGATGGATCAGATGCTACGATCGATGTCGCAGCGAGGTGAGGAAGAAAGTGAGGA_324-T	3	69.3	2.03716e+09
207+AGGAAAGAA	3	97.1	2.03716e+09
133-T_196-AGAAAGTGAGG	3	94.9	2.03716e+09
174-CGATGTCGCAGCGAGGTGAGGAAGAAAGTGAGGA	3	88.9	2.03716e+09
191-GAGGAAGAAAGTGAG_323-G	3	95.2	2.03716e+09
31-T_100+TG_149-T_172+TT_222+ATGA_242-G_280+CCAAGG_294-CG_301+TGttttttttttA_317+ATGTT	3	45.1	2.03716e+09
201-GTG	3	98.2	2.03716e+09
196-AGAAAG	3	97.6	2.03716e+09
315-A	3	93.7	2.03716e+09
145-G_202-TGAGGA	3	96.7	2.03716e+09
299-T	3	99.7	2.03716e+09
202-TGAGGA_255-A_323-G	3	96.1	2.03716e+09
205-G_326-G	3	99.4	2.03716e+09
89-C	3	98.8	2.03716e+09
13-T_202-TGAGGA	3	97	2.03716e+09
197-GAAAGTGAG_325-A	3	96.4	2.03716e+09
244-G	3	99.7	2.03716e+09
56-A	3	98.8	2.03716e+09
198-A	3	99.1	2.03716e+09
186-GAGGTGAGGAAG	3	94.6	2.03716e+09
117-T	3	99.1	2.03716e+09
200+ACAACTTTATTATACAAAGTTGTGGCGCGCCCCCCAACTGGGGTAACCTTTGGGCTCCCCGGGCGCGTACTCCACCTCTGGCGTC_210-A	3	77.9	2.03716e+09
206+GAGA	3	97.6	2.03716e+09
149-TG_200-AGTGAGG	3	97.3	2.03716e+09
201-GT	3	98.8	2.03716e+09
238-G	3	98.8	2.03716e+09
94-G	3	99.7	2.03716e+09
206+CT	2	84.1	1.35811e+09
207-A_321-G	2	97.9	1.35811e+09
15-C_202-TGAGGA	2	96.7	1.35811e+09
207+TCGTC	2	98.2	1.35811e+09
7-G_198-AAAGTGAGGA	2	95.8	1.35811e+09
35-G	2	97.9	1.35811e+09
14-G_152-GGGATGGATCAGATGCTACGATCGATGTCGCAGCGAGGTGAGGAAGAAAGTGAGGA	2	82.8	1.35811e+09
128-GGTGGTGAGGATGAGTCGGGCTGTGGGATGGATCAGATGCTACGATCGATGTCGCAGCGAGGTGAGGAAGAAAGTGAGGAGG	2	75.3	1.35811e+09
85-TC_202-TGAGGA	2	96.4	1.35811e+09
7+G_202-TGAGGA	2	96.7	1.35811e+09
209+TTGTAGTA	2	95.9	1.35811e+09
207-A_228-AG	2	99.1	1.35811e+09
207-AGGAGGGT_323-G	2	95.8	1.35811e+09
10-A_200-AGTGAGGAGG	2	95.2	1.35811e+09
100-GAAGTGTAACGGATACGTTAACTGTCTTGGTGGTGAGGATGAGTCGGGCTGTGGGATGGATCAGATGCTACGATCGATGTCGCAGCGAGGTGAGGAAGAAAGTGAG	2	68.1	1.35811e+09
20-CTG_40+CCCCGCGAAAATGCAT_80-AT_97-C_143-T_167+TGGCCCGTCCTTTTGAATCGC_185+CT_227+CCGC_252+AACATCAGGTCGCTCATGTCGG_322+CGGCCCCCGGCTCATCA	2	42.3	1.35811e+09
86-CTACCACCGGGCAAGAAGTGTAACGGATACGTTAACTGTCTTGGTGGTGAGGATGAGTCGGGCTGTGGGATGGATCAGATGCTACGATCGATGTCGCAGCGAGGTGAGGAAGAAAGTGAGGA_323-G	2	62.3	1.35811e+09
197-GAAAGTGAG_249-C	2	95.5	1.35811e+09
28+CA_51+ATCA_65+GCCC_80-A	2	57.1	1.35811e+09
203-GAGGAGG	2	96.1	1.35811e+09
14-G_69-G_207+A	2	97.6	1.35811e+09
20+CC_51-CGGGGATGCG_66+C_169-ACGATC	2	43.4	1.35811e+09
206+CCACTGC	2	90	1.35811e+09
115-CGTTAACTGTCTTGGTGGTGAGGATGAGTCGGGCTGTGGGATGGATCAGATGCTACGATCGATGTCGCAGCGAGGTGAGGAAGAAAGTGAGG	2	71.4	1.35811e+09
208+GGGGGTGGGTCAGGGG	2	94.5	1.35811e+09
69-GG	2	97.9	1.35811e+09
152-G_197-GAAAGTGAGG	2	95.5	1.35811e+09
66-TCTGGGGTGGAGGG_128+TAAA_175-GATGTCGCAGCGAGG_205-GGAGGAGG	2	41.5	1.35811e+09
212-GGTGGTAGTGCCACACAGAGAGCTTCGGATGTGGATACAA	2	86.1	1.35811e+09
194-GAAGAAAGTGAGGA_301-AAGCGTGCCGGAAG	2	91.6	1.35811e+09
203-GAG_323-GTA	2	98.2	1.35811e+09
207+A_326-G	2	99.4	1.35811e+09
9-T_206-GA	2	98.2	1.35811e+09
209+TAGT	2	97	1.35811e+09
18-CACTGCCAG_44-GACTGTCCGGG_81-TC_108-AC_138+CC_172-ATCGA	2	48	1.35811e+09
34+G_48+G_104-TGT_134-GA_173+GTGGATTTTGTTTTG	2	45.6	1.35811e+09
21-TGCCAG_43-TGA_75-GAGGGATC	2	54.7	1.35811e+09
205-G_327+A	2	99.4	1.35811e+09
7-G_203-GAG	2	98.8	1.35811e+09
198-AAAGTGAGGA_215-G	2	96.7	1.35811e+09
205+GGT_324-T	2	97.3	1.35811e+09
30-GTACTGCGCGGGCTGA_68-TGGGGTGGAGGGATCTGTCT_117+CCCCAAAAA	2	44.1	1.35811e+09
10-A_208+C	2	97	1.35811e+09
43+AT_125+GGCA_134+CCTTTGTAC	2	42.7	1.35811e+09
204+CGCCACTGCCAGTACGT	2	83.8	1.35811e+09
206-GA_329-G	2	99.1	1.35811e+09
10-A_208-G	2	99.4	1.35811e+09
27-CACGTA_74-GGA_171-GATCG_252+TC	2	42.8	1.35811e+09
208+GAAAGTGTGAGGAG	2	96	1.35811e+09
10-A_85-TCTACCACCGGGCAAGAAGTGTAACGGATACGTTAACTGTCTTGGTGGTGAGGATGAGTCGGGCTGTGGGATGGATCAGATGCTACGATCGATGTCGCAGCGAGGTGAGGAAGAAAGTGAGGA	2	62.7	1.35811e+09
10-A_197-GAAAGTGAG_323-G	2	95.5	1.35811e+09
166-GCTACGATCGATGTCGCAGCGAGGTGAGGAAGAAAGTGAG	2	86.7	1.35811e+09
30-GTACTGCG_52-GGG_83+CA_115+AAG_170-CGATC_188+T_216+T	2	48.8	1.35811e+09
20-CTGCCAGCACGTACTGCGCGG_66-TCT_87-TA_119+GG_145-GGGCT	2	46.9	1.35811e+09
203-GAGGAG_326+G	2	97.9	1.35811e+09
33+T_123-G	2	48.3	1.35811e+09
133-T_198-AAAGTGAGGA	2	95.5	1.35811e+09
209+GGTGGTAGTA	2	95.3	1.35811e+09
18+AGAGGAATATT_38+AAA_60-G_75+CAAAACAT_171-GA_223+T_248-ACAACGGAAGCTGAGACTACC_278-ACATCGGAAGA_297-C	2	43.7	1.35811e+09
207+A_322+T	2	98.2	1.35811e+09
197-GAAAGTGAGG_321-GT	2	94.9	1.35811e+09
44+TC_125+GGCACTTGTTGCTC_166-GCTACGA	2	42.7	1.35811e+09
86-CTACCACCGGGCAAGAAGTGTAACGGATACGTTAACTGTCTTGGTGGTGAGGATGAGTCGGGCTGTGGGATGGATCAGATGCTACGATCGATGTCGCAGCGAGGTGAGGAAGAAAGTGAGG_322+T	2	63.4	1.35811e+09
20-CT_70-GGGTGGAGGGATCTGTCTACCA_106-TAACGGATAC_121+TC_140-G	2	48.7	1.35811e+09
189-GTGAGGAAGAAAGTGA_329-G	2	93.4	1.35811e+09
203-GAG_250-A	2	98.5	1.35811e+09
20-CTG_40+CCCCGCGAAAATGCAT_80-AT_97-C_143-T_163+CCCGT_185+GCGGCGGCTTGCGCGGCT_227+CCGC_252+AACATCAGGTCGCTCATGTCGG_322+CGGCCCCCGGCTCATCA	2	42.5	1.35811e+09
196-AGAAAGTGAGG_326-G	2	95.2	1.35811e+09
152-G_203-GAG	2	98.8	1.35811e+09
13-T_191-GAGGAAGAAAGTGAGGAG	2	94.3	1.35811e+09
205-G_329-G	2	98.2	1.35811e+09
159-A_207+A	2	99.4	1.35811e+09
131-G_200-AGTGAGG	2	96.7	1.35811e+09
10-A_179-TCGCAGCGAGGTGAGGAAGAAAGTGAGGA	2	89.8	1.35811e+09
76-A	2	98.5	1.35811e+09
28-ACG_62+G	2	61.6	1.35811e+09
20-CTG_45+CGAAAATGCATGGGGAACAGGGCAAA_53+CCATCAGCGC_75+TAGACCTGGAACACGGTGAAT_110+ATGCA_153+C_213+CCA_263-ACTAC_322+CGGCCCCCGGCTCATCA	2	41.9	1.35811e+09
21-T_96-GCAAGAA	2	50.4	1.35811e+09
20+AACTCG_35+TG_81+TT	2	48.6	1.35811e+09
200+AGTTGGGTG_325-A	2	95.3	1.35811e+09
34+G_48+G_107-AACGGATAC_221-GCCACACA	2	42.3	1.35811e+09
43+A_180-C_189+CGGGGCTCTTTCTGA_218+C_298-GTTAA	2	42.7	1.35811e+09
159-ATCAGATGCTACGATCGATGTCGCAGCGAGGTGAGGAAGAAAGTGAGGA_323-G	2	83.7	1.35811e+09
30-GTACTGCG	2	57.7	1.35811e+09
209-GA	2	98.2	1.35811e+09
203-GAG_319-GA	2	98.5	1.35811e+09
7+G_197-GAAAGTGAGG	2	95.5	1.35811e+09
143-TCGGGCTGTGGGATGGATCAGATGCTACGATCGATGTCGCAGCGAGGTGAGGAAGAAAGTGAGGA_323-G	2	79.2	1.35811e+09
29+TAGC_106+CGCCTCC_144-CG_187-AGGTGA_205-GG_229-GAGAGCTTCGG_270-TA_311-GAAGAA	2	44.3	1.35811e+09
24-CAGCACGTACTGCGCG_66-TC_101+TTA_125+TGCTCAG_148-CTGTGGGATGGATC_191-GAGGA	2	43.5	1.35811e+09
175-GA_261-A_317+AACGAGTCAGCTTCCCG	2	42.6	1.35811e+09
208-GG_222-C	2	97.6	1.35811e+09
200+AGTGAGGAAGTTTGTATAGAAAAGTTGGGTG	2	90.1	1.35811e+09
152-G_207-AGGAGGGT	2	95.8	1.35811e+09
189-GTGAGGAAGAAA_321-G	2	94.3	1.35811e+09
107-A_185-CGAGGTGAGGAAGAAAGTGAGGA	2	91.6	1.35811e+09
13-T_87-TACCACCGGGCAAGAAGTGTAACGGATACGTTAACTGTCTTGGTGGTGAGGATGAGTCGGGCTGTGGGATGGATCAGATGCTACGATCGATGTCGCAGCGAGGTGAGGAAGAAAGTGAGGA	2	63.3	1.35811e+09
206-GA_271-A	2	97.9	1.35811e+09
207+A_253-G	2	97.9	1.35811e+09
10-A_155-ATGGATCAGATGCTACGATCGATGTCGCAGCGAGGTGAGGAAGAAAGTGAGGA	2	82.2	1.35811e+09
107-A_198-AAAGTGAGGA	2	95.2	1.35811e+09
10-A_207+A_323-G	2	99.1	1.35811e+09
10-A_323-G	2	98.2	1.35811e+09
14-G_202-TGAGGA	2	96.7	1.35811e+09
126+GA_171+CCCA_196+TAGAAAAGTTG	2	82.5	1.35811e+09
193-GGAAGAAAGTGAG_324-T	2	94.6	1.35811e+09
308+GAAAACACTCTAGGCATAAC	2	47.1	1.35811e+09
94-G_194-GAAGAAAGTGAGGA	2	95.5	1.35811e+09
205-G_324-T	2	99.1	1.35811e+09
324+T	2	99.7	1.35811e+09
74-GG_202-TGAGGA	2	96.4	1.35811e+09
206-GA_325-A	2	99.1	1.35811e+09
201-GTGAGGAGGAGGGTGGTAGTG_261-AGACTACCGTAT	2	80.7	1.35811e+09
43+AT_174+TTTGTTTTGC	2	42.2	1.35811e+09
185+AGTACGCGCCCGGGGAGCCCAAAGGTTACC_195+GGCGCGCCCAACTTTGTATAGAAAAGTT	2	81.3	1.35811e+09
202-TGAGGA_223-CA	2	96.4	1.35811e+09
131+G	2	98.2	1.35811e+09
208+TGGTAGTAAG	2	95.6	1.35811e+09
207+GTGGTAGTGCGGTAGGGA	2	93.7	1.35811e+09
200+AGTGATATATCTATATTTGAACGCttttttttACGCGTGGGTCCCATGGGTGAGGTGGAGTACGCGCCCGGGGAGCCCAAAGGTTACCCCAGTTGGGGGGCGCGCCCAACTTTGTATAGAAAAGTTGGGTG	2	70.6	1.35811e+09
207+AAGGGC	2	97.9	1.35811e+09
207+GAAAGTGAGCGAGGTGAGGAAGAAAGTGAGGAAGAA	2	89.1	1.35811e+09
200-AGTGAGG_323-GTA	2	97	1.35811e+09
322+T	2	98.8	1.35811e+09
207+A_301-A	2	98.2	1.35811e+09
312-A	2	93.1	1.35811e+09
202-T	2	98.8	1.35811e+09
207+GGA	2	97.3	1.35811e+09
206-GA_312-A	2	99.1	1.35811e+09
13-TG_207+A	2	99.1	1.35811e+09
60-GATGTATCTGGGGTGGAGGGATCTGTCTACCACCGGGCAAGAAGTGTAACGGATACGTTAACTGTCTTGGTGGTGAGGATGAGTCGGGCTGTGGGATGGATCAGATGCTACGATCGATGTCGCAGCGAGGTGAGGAAGAAAGTGAG_327-A	2	55.1	1.35811e+09
29+TAGC_81-TCTGTCT_125-CTTG_171+TCTG_184+T_211+AG_219+G_229-GAGAGCTTCGG_270-TA_311-GAAGAA	2	46.2	1.35811e+09
207+AGAGTC	2	97.9	1.35811e+09
69-G_196-AGAAAGTGAGG	2	96.4	1.35811e+09
180-CG_196-AGAAAGTGAGG	2	96.1	1.35811e+09
194-GAAGAAAGT	2	97	1.35811e+09
80-A	2	97.9	1.35811e+09
204+AAAA	2	98.5	1.35811e+09
89-C_199-AAGTGAGG	2	97.3	1.35811e+09
10-A_197-GAAAGTGAG	2	95.5	1.35811e+09
191-GAGGAAGAAAGTGAG_325-A	2	95.2	1.35811e+09
20-CTG_33+AGGATCGCCCCGCGAAAATGCATGGGGAACAGGGCAAAAATGCCCGCCAT_51+ATTCAG_66+C_110+ATGCA_153+C_213+CCA_263-ACTAC_322+CGGCCGCCGGCTCATCA	2	41.9	1.35811e+09
198-AAAGTGAGGA_327-A	2	96.7	1.35811e+09
318-C	2	95.8	1.35811e+09
76-A_202-TGAGGA	2	96.4	1.35811e+09
9-T_202-TGAGGA	2	96.7	1.35811e+09
205+T	2	98.5	1.35811e+09
189-GTGAGGAAGAAA_321-GT	2	95.5	1.35811e+09
207+A_323+G	2	97.9	1.35811e+09
29+TAGC_81-TCTGTCT_125-CTTG_171+TCTGCTTAGA_205-GG_229-GAGAGCTTCGG_270-TA_311-GAAGAA	2	44.2	1.35811e+09
208+GGAGAG	2	97.3	1.35811e+09
123-GTCTTGGTGGTGA_205-GGAGGAGG_266-ACCG_299+GT_315+TT	2	43.6	1.35811e+09
50-C_189-GTGAGGAAGAAA	2	96.1	1.35811e+09
178-GTCGCAGCGAGGTGAGGAAGAAAGTGAGGA_325-A	2	90.7	1.35811e+09
189-GTGAGGAAGAAAGTGAGGA_324-T	2	94	1.35811e+09
197-GAAAGTGAG_319-GA	2	94.9	1.35811e+09
206+GAGAGA	2	97.9	1.35811e+09
207+A_320+A	2	99.4	1.35811e+09
263+A	2	95.2	1.35811e+09
250-A	2	99.7	1.35811e+09
250-A_312+A	2	89.5	1.35811e+09
7-G_206-GA	2	97.6	1.35811e+09
196-AGAAAGTGAGG_325-A	2	96.4	1.35811e+09
133-T_199-AAGTGAGG	2	95.2	1.35811e+09
198-AAAGTGAGGA_322-T	2	96.4	1.35811e+09
196-AGAAAGT	2	95.8	1.35811e+09
283+G_321-G	2	95.2	1.35811e+09
283+G_322-T	2	87.4	1.35811e+09
189-GTGAGGAAGAAA_323-G	2	95.5	1.35811e+09
161-CAGATGCTACGATCGATGTCGCAGCGAGGTGAGGAAGAAAGTGAG	2	85.2	1.35811e+09
248-A	2	98.2	1.35811e+09
20-CTG_33+AGGATCGCCCCGCGAAAATGCATGGGGAACAGGGCAAAAATGCCCGCCAT_51+ATTCAG_66+C_110+ATGCA_153+C_213+CCA_263-AC_296+C_320+GCCCCCGGCTCAT	2	42.7	1.35811e+09
10-A_195-AAGAAAGTGAGGA_216-GTAGTGCCACACAGAGAGCTTCGGATGTGGATACAACGGAAGCTGAGACTACCGTATTGTTCACATCGGAAGAAACGACGA	2	70.5	1.35811e+09
174-CGATGTCGCAGCGAGGTGAGGAAGAAAGTGAGGAG	2	89.2	1.35811e+09
183-AGCGAGGTGAGGAAGAAAGTGAGGA_275-T	2	88.3	1.35811e+09
196-AGAAAGTGAG	2	96.1	1.35811e+09
198-AAAGT	2	97	1.35811e+09
212-GGT	2	97.6	1.35811e+09
201+CAACTTT_229+ACTGGGGTAACCTTTGGGCTC	2	83.3	1.35811e+09
14-GCGCC_129+GCCAATTAGGTGCGAGAGCACGC_210+TT	2	42.1	1.35811e+09
43+AT_104-TGT_134-GA_161+TTCGG_174+TTTGTTTTGC	2	45.1	1.35811e+09
14-G_203-GAGGAG	2	96.1	1.35811e+09
28-ACGTACTGCG_126+G_137+CGAGCGGGCC_185-C_316+TGC	2	45.1	1.35811e+09
145-G	2	98.8	1.35811e+09
310-G	2	96.7	1.35811e+09
197-GAAAGTGAG_327-A	2	97	1.35811e+09
203-GAGGA_321-GT	2	96.4	1.35811e+09
203-GAGG_324-T	2	98.5	1.35811e+09
199-AAGTG	2	97.6	1.35811e+09
281-T	2	91.6	1.35811e+09
195-AAGAAAGTGA	2	96.1	1.35811e+09
10-A_203-GAGGAG	2	96.7	1.35811e+09
201-GTGAG_329-G	2	97.3	1.35811e+09
29+AAAT_77+TTTCT_126+A_184+cacGGCCG_203+CGAAGCGGCCC_257+C_264+ACG_315+CA	2	43.9	1.35811e+09
52-G_207+A	2	99.4	1.35811e+09
52-G_202-TGAGGA	2	96.7	1.35811e+09
10-A_207+C	2	97.3	1.35811e+09
285-A	2	98.2	1.35811e+09
205-GG_252-C	2	92.5	1.35811e+09
207+A_321-G	2	97.3	1.35811e+09
203+GGA	2	97	1.35811e+09
202-TGAGGA_222-C	2	96.7	1.35811e+09
212-GGTGGT	2	89.8	1.35811e+09
129-GTGGTGAGGATGAGTCGGGCTGTGGGATGGATCAGATGCTACGATCGATGTCGCAGCGAGGTGAGGAAGAAAGTGAGGA	2	75.3	1.35811e+09
211-GGGTGGTAGTGCCACACAGAGAGCTTCGGATGTGGATACAACGGAAGC	2	83.1	1.35811e+09
203-GAG_320-A	2	96.7	1.35811e+09
207+AAAGGA	2	97.6	1.35811e+09
189-GTGAGGAAGAAAGTGAGGA_327+A	2	91.6	1.35811e+09
250-AACGGA	2	90.7	1.35811e+09
301-A	2	99.1	1.35811e+09
10-A_201-GTGAGG	2	97.9	1.35811e+09
207-A_326-G	2	97.9	1.35811e+09
76-A_196-AGAAAGTGAGG	2	95.5	1.35811e+09
203-GAGGAG_323-G	2	97	1.35811e+09
200-AGTGAGGAGGAG	2	94.9	1.35811e+09
20-CTG_33+AGGATCGCCCCGCGAAAATGCATGGGGAACAGGGCAAAAATGCCCGCCAT_51+ATTCAG_66+C_110+ATGCA_153+C_213+CCA_263-ACTAC_322+CGGCCCACGGCTCATCA	2	41.9	1.35811e+09
207+A_319-GA	2	96.4	1.35811e+09
197-GAAAGTGAGGAG_326-G	2	94.9	1.35811e+09
206+GATAAT	2	98.2	1.35811e+09
207+AAATGC	2	97.6	1.35811e+09
207+GGAA	2	97.3	1.35811e+09
189-GTGAGGAAGAAA_327-A	2	94.6	1.35811e+09
217-TAGT	2	89.5	1.35811e+09
257+G	2	92.2	1.35811e+09
128-G	2	99.7	1.35811e+09
167-CTACGATCGATGTCGCAGCGAGGTGAGGAAGAAAGTGAGGA_324-T	1	86.7	6.79053e+08
265-TACCGTATTGTT	1	87.7	6.79053e+08
206+GACTGAGAT	1	96.2	6.79053e+08
194-GAAGAAAGTGAGGA_299-T	1	89.2	6.79053e+08
38-C_70+a_89-C	1	79	6.79053e+08
204+CCACGGGAGGGTGGTGCT	1	93.7	6.79053e+08
205+ggagtggagggaggagggggtagtggagg	1	91.7	6.79053e+08
206+GCTGGTGGAATGAGATGAGGTGGAGGTGGACGCGAGGAGGAAAAGAAGAAAGT	1	84.4	6.79053e+08
270+T	1	91.6	6.79053e+08
207+GTAGGC	1	90.8	6.79053e+08
25-A_200-AGTGAGG	1	85.5	6.79053e+08
107-A_200-AGTGAGG	1	97	6.79053e+08
207+A_322-T	1	95.8	6.79053e+08
52-GGGGATGCGATGTATCTGGGGTGGAGGGATCTGTCTACCACCGGGCAAGAAGTGTAACGGATACGTTAACTGTCTTGGTGGTGAGGATGAGTCGGGCTGTGGGATGGATCAGATGCTACGATCGATGTCGCAGCGAGGTGAGGAAGAAAGTG_323-G	1	52.1	6.79053e+08
202-TGAGGA_255+A_307-G	1	89.5	6.79053e+08
50+C_69-GGGGTGGAGGGATCTGTCTACCACCGGGCAAGAAGTGTAACGGATACGTTAACTGTCTTGGTGGTGAGGATGAGTCGGGCTGTGGGATGGATCAGATGCTACGATCGATGTCGCAGCGAGGTGAGGAAGAAAGTGAGGA	1	57.4	6.79053e+08
202+GTTACCCCAGTTGGGGGGCGCGCCCAACTTTGTATAGAAAAGTTGGGTGAT	1	77.3	6.79053e+08
106-T_135-AGGATGAGTC_165-TGCTAC_189+TAT	1	45.1	6.79053e+08
186-GAGGTGAGGAAGAAAGTGAG_321-GTG	1	91.9	6.79053e+08
193-GGAAGAAAGTGAGGAGG_323-G	1	90.7	6.79053e+08
218-AGTGCCA_253+AGAAAGG	1	88.5	6.79053e+08
20-CTGCCAGCACGTACTGC_60-GATGT_100+AGCAAACAGC_111+CGAA_166-GC	1	43	6.79053e+08
10-A_202-TGAGGA_323-G	1	96.4	6.79053e+08
52-G_198-AAAGTGAGGA	1	96.7	6.79053e+08
28+CGGACACGA_46+AGGCG_64+AACGCCAAGCAGCAGGAGCGCGAGAAGCTGCAGCTGGCGC_96+CA_124+CAGGAGGAGATGGAGC_149+GCAGGACACGACA_169+GAAGAAGGTGAAGGCGGCGAAGGAG_177+G_224+GAAG_264+TT	1	43.2	6.79053e+08
10-A_199-AAGTGAGG_325-A	1	97	6.79053e+08
43+AT_91-ACCGGGCAA_136-G_166-GC	1	44.5	6.79053e+08
320+GA	1	89.2	6.79053e+08
10+A_196-AGAAAGTGAGG	1	96.4	6.79053e+08
45+GACGGC_94-GGGCAA_121+ACAAT_174+AAAGG_223+TCCTCTTGCTTTGTTTCCTGCA_246+T_311-GA	1	42.9	6.79053e+08
240+A_318-C	1	85.3	6.79053e+08
251-AC	1	87.7	6.79053e+08
188-GGTGAGGAAGAAAGTGAG_329-G	1	93.1	6.79053e+08
133-T_208+GGGT	1	95.2	6.79053e+08
14-G_203-GAGG	1	98.5	6.79053e+08
20-CTG_40+CCCCGCGAAAATGCAT_80-AT_97-C_143+AGCAGTGTTTCATGCATCACCC_223+CCAT_252+AACATCAGGTCGCTCATGTCGG_322+CGGCCCCCGGCTCATCA	1	40.2	6.79053e+08
201-GTGAG_323-G	1	96.1	6.79053e+08
34+G_48+G_120+GTGTTGG	1	43.7	6.79053e+08
208+GGGGGGGAGAAAGTGGG	1	93.7	6.79053e+08
294-CGACGTTAAGCG	1	88.9	6.79053e+08
69+C	1	50.5	6.79053e+08
13-T_200+AGTGAGGAATGAGAAGTTGGGTG	1	92.7	6.79053e+08
59-C_202-TGAGGA	1	93.7	6.79053e+08
240+ATGAGGATACAAATAATGCTAAGCAGAGAGGTTCGA	1	84.2	6.79053e+08
248+ACAGGGCCACACAAAATACTTGGGATGTGAAG	1	83	6.79053e+08
14-G_198-AAAGTGAGGA	1	95.5	6.79053e+08
162-AGATGCT_185-CGAGGTGAGGAAGAAAGTGA	1	87.7	6.79053e+08
104-TGTAACGGATACGTTAACTGTCTTGGTGGTGAGGATGAGTCGGGCTGTGGGATGGATCAGATGCTACGATCGATGTCGCAGCGAGGTGAGGAAGAAAGTGAGGA	1	67.5	6.79053e+08
200-AGTGAGG_223-CA	1	97	6.79053e+08
191-GAGGAAGAAAGTGAG_327-A	1	92.8	6.79053e+08
145-G_204-AGGA	1	98.5	6.79053e+08
204-AGGA_326-G	1	96.1	6.79053e+08
34+A_48+G_104-TGT_134-GA_161+TTCGG_174+TTTGTTTTGC	1	46.6	6.79053e+08
20-CTG_33+AGGATCGCCCCGCGAAAATGCATGGGGAACAGGGCAAAAATGCCCGCCAT_51+ATTCAG_66+C_110+ATGCA_153+C_213+CCA_263-ACTAC_322+CGGCCCCCGGCTCAGCA	1	42.4	6.79053e+08
209+TGGAAGT	1	96.8	6.79053e+08
202-TGAGGA_263-A	1	87	6.79053e+08
275-TTCA_309-CGG	1	58.3	6.79053e+08
69-G_205+GGGTGGAG	1	95.6	6.79053e+08
194+GAAGAAAGTGAGGAGAGGAGGGTGCTGCAGTAGAGGGGCGCGTCGAAGTTTGTATAGAGAAAT	1	82.8	6.79053e+08
200-AGTGAGG_327-A	1	96.1	6.79053e+08
183-AG	1	97.9	6.79053e+08
269-G	1	89.2	6.79053e+08
298-G	1	90.4	6.79053e+08
207+GCA	1	97.9	6.79053e+08
189-GTGAGGAAGAAAGTGA_323-G	1	93.4	6.79053e+08
255-A_277+C_298-G	1	92.8	6.79053e+08
34+G_52-G_174+TTTGTTTTGC	1	44.4	6.79053e+08
219-GT	1	89.8	6.79053e+08
204-AGGA_254+GAGA	1	89	6.79053e+08
39-GGGCTG_82+G_100+CCG_118+C_174+G_181-GCA_203-GAGGAGGAGGGTGGTAGTGCCACACAG_272-T	1	44.1	6.79053e+08
161-CAGA_192-AGGAAGAA	1	78.2	6.79053e+08
152-G_188-GGTGAGGAAGAAAGTGAGGAG	1	93.4	6.79053e+08
13-T_203-GAG	1	97.3	6.79053e+08
203+CGTAGTGAGTAGAGA	1	95.1	6.79053e+08
123-GTCTTGGTGGTGA_209-GAGGGT_237+G_273-TGTTCACA_300+A	1	44.4	6.79053e+08
202-TGAGGA_226+ACACAG	1	92.6	6.79053e+08
200-AGTGAGG_255+A	1	86.5	6.79053e+08
172-ATCGATGTCGCAGCGAGGTGAGGAAGAAAGTGAGGA_325-A	1	88.9	6.79053e+08
197-GAAAGTGAGGAGGAG_321-G	1	94	6.79053e+08
199+AACAACTTTATTATACAAAGTTGTGGCGAGCCTTCCATCTGTGTGGGTGAAAAGTTGGGT	1	83.4	6.79053e+08
206+GGAAAGTGAGCGAGGTGAGGAAGAAAGTGAGGAAGA	1	89.4	6.79053e+08
13-T_198-AAAGTGAGGA	1	95.5	6.79053e+08
212+T_322-T	1	96.4	6.79053e+08
200+ACAACTTT_236+AACCTTTGGGCTCCCCGGGCGCGTACTCCACCTC_256-AGCTG	1	79.1	6.79053e+08
201+CAACTTTATTATACAAAGTTGTGGCGCGCCCCCCGACTG	1	87.3	6.79053e+08
201+CAACTTTATTATACAAAGTTGTGGAGCGGACCCCAACTGGGGTAACCTTTGGGCTTCCCGGGC	1	82.5	6.79053e+08
124-TCTTGGT_163-G_209-GAGGGTGGT_233-GCTTCGG	1	44.8	6.79053e+08
252+G	1	88.3	6.79053e+08
200+AGTGAGGAATAAGAGGTTAGGAG	1	93.2	6.79053e+08
183-AGCGAGGTGAGGAAGAAAGTGAG	1	91.9	6.79053e+08
200+ACAACTTTATTATACAAAGTTGTGGCGCGCACCCCAACTGGGTGGGTGAAAAGTTGGGTG	1	82.9	6.79053e+08
29+TAGC_81-TCTGTCT_125-CTTGGTGGTGAGGATGA_153-GGAT_224-ACACA_245+ATA_269+GGCG_290+GTCG	1	43.2	6.79053e+08
206+GAAAAGTGACAAGTGACAAGT	1	92.4	6.79053e+08
135-A_199-AAGTGAGG	1	96.1	6.79053e+08
206-GA_238-G	1	98.8	6.79053e+08
280+A_326-G	1	88.9	6.79053e+08
201-GTG_222+C	1	88.9	6.79053e+08
208+GGGATAGTACCAAGCAAG	1	93.4	6.79053e+08
69-G_197-GAAAGTGAGG	1	95.8	6.79053e+08
52-G_183-AGCGAGGTGAGGAAGAAAGTGAGG	1	87.3	6.79053e+08
87-T_206-GA	1	99.1	6.79053e+08
20-CTG_33+AGGATCGCCCCGCGAAAATGCATGGGGAACAGGGCAAAAATGCCCGCCAT_51+ATTCAG_66+C_110+ATGCA_167-CTAC_204+CCGCCAAA_248-ACAAC_322+CGGCCCCCGGCTCATCA	1	41.1	6.79053e+08
191-GAGGAAGAAAGTGAGGA_324-T	1	94.6	6.79053e+08
184-GCG_201-GTGAGG	1	92.5	6.79053e+08
29+TAGC_81-TCTGTCT_125+GTCCCGCTTTGACA_144-CG_187-AGGTGA_205-GG_229-GAGAGCTTCGG_270-TA_311-GAAGAA	1	44	6.79053e+08
207+tggtaagaaagaaaggaagaaaggaagaaaggaagaaaggagaa	1	87.2	6.79053e+08
43+AT_107-AACGGATAC_135-A	1	43.9	6.79053e+08
208+GGGGTAGTGCGAAGAAAG	1	93.7	6.79053e+08
89-C_193-GGAAGAAAGTGAGG	1	94.3	6.79053e+08
201+CAGCTTTAGTATAGAAAGGTGTGACGGATTCCACGATAGGTGTAACTTATGAGCGAG_208+AGAAAT	1	83.3	6.79053e+08
10-A_203-GAGG	1	97	6.79053e+08
39-G_202-TGAGGA	1	96.4	6.79053e+08
205-G_248+ACAAAGTGCAaaaaagagagcgtatgaggtagag	1	81.1	6.79053e+08
205+GGAgggggggggggggggcaaggggagggggtggggagggggggaagggggggggtgggggggggggtgggggagggggcaggagggggggtgggggggggggggggaggaaggggg	1	73.7	6.79053e+08
69-G_161-CAGATGCTACGATCGATGTCGCAGCGAGGTGAGGAAGAAAGTGAGG	1	84.6	6.79053e+08
192-AGGAAGA	1	94.6	6.79053e+08
183-AGCGAGGTGAGGAAGAAAGTGAGGA_324-T	1	90.7	6.79053e+08
203-GAG_226-A	1	84	6.79053e+08
18+CCCCAAAAGGATCGA_136-GG_152-GGGATG_191-GA_213-GTGGTA_229-GAGAGCTTCGG_270-TA_311-GAAGAA	1	44.1	6.79053e+08
203-GAGGAG_239-GATGTGGAT	1	89.2	6.79053e+08
220+GC_296+T_322+GATTTTGTTTTGCTGT	1	43.2	6.79053e+08
207+AAAGTA_321-G	1	90.5	6.79053e+08
203-GAGGAG_329-G	1	97.6	6.79053e+08
73-T_207+A	1	97	6.79053e+08
123-GTCTTGGTGGTGA_218-AGTG_233+TTGCAC_275-TT_301-AAGCGTGCCGG	1	42.8	6.79053e+08
75-GAGGGATCTGTCTACC_105-G_124-T_180-CGCA_239+TGCTTGTGGTCGTTTATTTTTTGTT	1	42.3	6.79053e+08
202-TGAGGA_219-GT	1	95.8	6.79053e+08
46+GGCTATCAT_127-TGGTGGTGAGGATGAGTCGGGCTGTGG_186+T_237-CGGATGTGG	1	39.3	6.79053e+08
208+AAGACG	1	97.9	6.79053e+08
200-AGTGAGGAGGAGG_323-G	1	84.9	6.79053e+08
107-A_201-GTGAG	1	96.1	6.79053e+08
203+gaggaaaagaagagaaaggaaaagaagaaagtgaggaaaagtatagaaaagTTGGGTGAGA	1	84.2	6.79053e+08
73-T_206-GA_323-G	1	97	6.79053e+08
250-A_305+G	1	88.6	6.79053e+08
321-GTG	1	97	6.79053e+08
35+A_48+G_100-GAAGTGTAAC_166-GC	1	45	6.79053e+08
21-TGCCAGCACGTA_71+CGCCCC_86+AGAAGC_207+AAAGTC	1	77.1	6.79053e+08
192-AGGAAGAAAGTGAGGAGGA_327-A	1	93.1	6.79053e+08
208+GTATCCTGGAGATTTGTCAGGCCACTCACTAAATAAT	1	89.2	6.79053e+08
263+A_324-T	1	88	6.79053e+08
165-TGCTACGATCGATGTCGCAGCGAGGTGAGGAAGAAAGTGAGGAGG_321-G	1	76.8	6.79053e+08
22+AGGACGAAAGGATCGCCCCGCGAAAATGCATGGGGAACAGGGCAAAAATGCCC_74+A_106+TT_114+CAC_155+GCAC_263-AC_298+CATCGAGCCAAACA	1	41.3	6.79053e+08
206+GCTGGTGGAGTGAGGTGAGGTGGAGGTGGAAGCGAGGTGGAAGGAAGTGAGGT	1	85.2	6.79053e+08
27+GA_85-TCTAC_139-TGAG_178-GTCGCAGCGAG	1	44.3	6.79053e+08
182-CAGCGA	1	92.8	6.79053e+08
252-C_317+G	1	89.2	6.79053e+08
207+GTATAAAGGGGAAGATGTGTGAGTGAGA	1	91.1	6.79053e+08
203-GAGGAG_293+AC	1	88	6.79053e+08
205+ggaggggagggaggagggtgtagtggagt	1	92	6.79053e+08
207+GGGA	1	97	6.79053e+08
202-TGAGGA_321-GTGT	1	95.5	6.79053e+08
136-G_202-TGAGGA	1	96.7	6.79053e+08
67+TCATTC_83+ATTTCAAT_98-A	1	52.8	6.79053e+08
298+AT	1	91.9	6.79053e+08
190-TGAGGAAGA	1	95.8	6.79053e+08
201-GTGAGGAGGAGGGTGGTAGTGCC_291+G	1	82.9	6.79053e+08
214-TGGTAGT_259-T	1	89.8	6.79053e+08
22+CGTC	1	62	6.79053e+08
199-AAGTGAGG_290-ACG	1	94.6	6.79053e+08
205+GGGGGGAGGGTGAGGGT	1	93.4	6.79053e+08
31-TACTGCGCGGGCTGACTGTC_85-TCTA_104-T_111+CGA_160+AG_176+C_235-TT_255-AA_277-CA	1	46.7	6.79053e+08
189-GTGAGGAAGAAA_329-G	1	96.1	6.79053e+08
128-GGTGGTGAGGATGAGTCGGGCTGTGGGATGGATCAGATGCTACGATCGATGTCGCAGCGAGGTGAGGAAGAAAGTGAGGAG	1	75	6.79053e+08
43+AT_125+GGCACTTGTTGCTC_166-GCTA	1	43.3	6.79053e+08
180-CGCAGCGAGGTGAGGAAGAAAGTGAGGAGG	1	88	6.79053e+08
122-TGTCTTGGTGGTGAGGATGAGTCGGGCTGTGGGATGGATCAGATGCTACGATCGATGTCGCAGCGAGGTGAGGAAGAAAGTGAGGAG	1	73.5	6.79053e+08
200+AGTGAGTTATCAACTTGAAAAAGTGGCACCGAGTCGGTGCttttttttACGCGTGGGTCCCATGGGTGAGGTGGAGTACGCGCCCGGGGAGCCCAAAGGTTACCCCAGTTGGGGGGCGCGCCCAACTTTGTATAGAAAAGTTGGGAG	1	68.3	6.79053e+08
277-C_298+A	1	88.6	6.79053e+08
202-TGAGGA_282-C	1	96.1	6.79053e+08
281-T_318-C	1	90.7	6.79053e+08
119-A_206-GA	1	99.1	6.79053e+08
50-C_202-TGAGGA	1	97.3	6.79053e+08
34+G_48+G_104-TGT_130+CACTTGTTGCTCCTT_152+A_171-GAT	1	46.3	6.79053e+08
208+CC	1	98.2	6.79053e+08
310+A_327-A	1	88.3	6.79053e+08
205+CCACTT	1	97	6.79053e+08
291+C_310-G	1	91	6.79053e+08
73-T_193-GGAAGAAAGTG	1	91.3	6.79053e+08
33+T_71+AAAACACCGTCACGC_96+CCTGGACA_138+CCACCATTACCCTGAGCTTTAAGGCCGGGA_182+TCTGCGGT_218+CACGGTGAACAAGACC_231+TTCT_261+CATGGATAA_293+TACAGGACCCGATGA_319+AG	1	40.7	6.79053e+08
190-TGAGGAAGAAAGTGA_271-A	1	86.4	6.79053e+08
275-T	1	93.7	6.79053e+08
115-CGTTAACTGTCTTGGTGGTGAGGATGAGTCGGGCTGTGGGATGGATCAGATGCTACGATCGATGTCGCAGCGAGGTGAGGAAGAAAGTGAG	1	71.1	6.79053e+08
204+ACACAGTGAGGGGAGTGGTAGGGCCATCAAA	1	90.9	6.79053e+08
69-G_199-AAGTGAGG	1	95.8	6.79053e+08
211-GGGTGG	1	90.4	6.79053e+08
20-C_41-GCT_59-CGATGTAT_85-TCTACCACCGGGCAAGAAGT_150-GTGGGATGGATCAGATGCTACGATCGATG_187-A_218-AGTGC_296+CGGA_321+GAT	1	44	6.79053e+08
29+TAGC_81-TCTGTCT_125+GTCCCGCTTTGACA_144-CG_187-AGGTGA_205-GG_229-GAGAGCTTCGG_270-TA_307-GCCGGA	1	44.3	6.79053e+08
208+AAGTAG	1	97.9	6.79053e+08
25-AGCA_65+CCAGCACGCG_83+CACGCGGTCA_115-CGTTAACTGT_244+ATGTC_279+TCGGAGTCCGTTTC	1	42	6.79053e+08
198-AAAGTGAGGA_299-T	1	95.2	6.79053e+08
203+GAGGGTGGAGGGAGAGG	1	93.4	6.79053e+08
200+AGTTGGGTG_285-A	1	95	6.79053e+08
207+ACTGGTAGGTGAGGAAGAAAGTGAGGAAGAAA	1	91.2	6.79053e+08
200-AGTGAG_249-CAACG	1	75	6.79053e+08
33-CT	1	87.3	6.79053e+08
305+A	1	88.9	6.79053e+08
179+AGGTGGAGTACGCGCCCGGGGAGCCCAAAGGTTA_195+CGCCCAACTTTGTATAGAAAAGAT	1	81.5	6.79053e+08
207+GAGTAGGAAA	1	95.3	6.79053e+08
256-AGCTGAGACTAC	1	89.8	6.79053e+08
206-GA_322-T	1	90.4	6.79053e+08
201+CAACTTTATTATACAAAGTTGTGGCGCGCGCCCCAACTGGGGTAACC_227+CCTCAC	1	77.4	6.79053e+08
202+TGAGGTGGAGTACGCGCCCGGGGAGTCCAAAGGTTACCCGAGTTGGGGGCGCGCCCAACTTGGTATAGAAAAGAGGGGTGAA	1	79	6.79053e+08
172-A	1	83	6.79053e+08
202-TGAGGA_254+ACA	1	87.5	6.79053e+08
201-GTGAG_327-A	1	95.8	6.79053e+08
203-GAGGAG_263-A	1	86.1	6.79053e+08
329+G	1	90.1	6.79053e+08
204-AGGA_322+T	1	97.3	6.79053e+08
203+GAGGAG	1	97	6.79053e+08
74-G_194-GAAGAAAGTGA	1	96.1	6.79053e+08
34+G_48+G_104-TGT_129-GT_161+TTCGG_174+TTTGTTTTGC	1	47.1	6.79053e+08
208+CGGTGGTAGGG	1	96.8	6.79053e+08
208+GGGGTAGTACCACACAGG	1	93.7	6.79053e+08
21-TG_70+CCAGCgtgt_107+C_120+GACTAACAC_149-TGTGGGATGGATCAG_181+TA_238-GGATGT_295+AGTGT	1	44.1	6.79053e+08
13-T_207+A	1	98.2	6.79053e+08
207+AAAAA	1	97.6	6.79053e+08
217+T_269-G	1	86.8	6.79053e+08
207+A_222-C	1	99.1	6.79053e+08
308-C	1	97	6.79053e+08
101-AAGT_112-A_140+AAGGGACTCG_187+TT_202+C_246-ATAC_267+GCTCG_294+AAT_309+GACGAGTCCCTCTCTGCCCCCGATCG	1	46.7	6.79053e+08
20-CTG_33+AGGATCGCCCCGCGAAAATGCATGGGGAACAGGGCAAAAATGCCCGCCAT_51+ATTCAG_66+C_110+ATGCA_155+GCAC_263-ACTAC_322+CGGCCCCCGGCTCATCA	1	40.5	6.79053e+08
69-G_207+A	1	96.4	6.79053e+08
191-GAGGAAGAAAGTGAG_322-T	1	88.9	6.79053e+08
34+G_48+G_120+GTGTTGGCACT_152+A_171-GAT	1	46.8	6.79053e+08
77-G_206+GT	1	97.9	6.79053e+08
204+AGGATA	1	98.2	6.79053e+08
200+AGTGAGGTTACCCGAGTTGGGGGGCGCGCCCAACTTTGTATAGAAAAGTTGGGTG	1	85	6.79053e+08
201+GTG	1	97.3	6.79053e+08
206-GAGGA_298-G	1	92.5	6.79053e+08
73-T_200-AGTG	1	96.1	6.79053e+08
200-AGTGAGG_322-TGTA	1	95.8	6.79053e+08
14-G_206-GAGGA	1	97	6.79053e+08
52-G_209+TGGTAGT	1	95.3	6.79053e+08
200+AGTGAGGAATGAGGAGTTGGGTG	1	93.2	6.79053e+08
130-TGGTGAGGATGAGTCGGGCTGTGGGATGGATCAGATGCTACGATCGATGTCGCAGCGAGGTGAGGAAGAAAGTGAGGA_323-G	1	75.3	6.79053e+08
207+AAGGTA	1	97.9	6.79053e+08
204+AGGAAA	1	96.2	6.79053e+08
202-TGAGGA_261+A_288-A	1	90.4	6.79053e+08
13-T_197-GAAAGTGAGG_327-A	1	95.2	6.79053e+08
207+AAA	1	98.8	6.79053e+08
203-GAGGAG_289-AACG_319+GTCA	1	85.4	6.79053e+08
244-G_263+A_282-C	1	89.5	6.79053e+08
201-GTGAGGAGGAGGGTGGTAGTGC	1	86.4	6.79053e+08
201-GTGAGG_222-C	1	97.9	6.79053e+08
20-CTG_36+ATCGCCCCGCGAAAATGCATGGGGAACAGGGCAAAAATGCC_63+CAGCGTGTAGACCTGG_110+ATGCA_155+GCTC_263-AC_301+CTATCCACA_320+TCAGA	1	41.5	6.79053e+08
198+AAAGTGACACAGTGAGGAGGGTGGTAGGGCA	1	91.5	6.79053e+08
203-GAGGAG_292-G	1	84.9	6.79053e+08
200+ACAACTTTATTATACAAAGTTGTGGCGCGCCCCCCAACGGGGTGGGTGAAAAGTTGGGTG	1	83.4	6.79053e+08
200-AGTGAGG_250+GGGAGAA	1	89.4	6.79053e+08
200+AGGGTATCCCAGTTGGCTGGCGCGCTCAACTTTGTATAGAAAAGATGGGTG	1	85.9	6.79053e+08
204-AGGA_321-G	1	97.3	6.79053e+08
7-G_204+A	1	99.1	6.79053e+08
207+AAAAGC	1	97.9	6.79053e+08
204+ACACAGTGAGGAGGGTGGTAGTACCAAATAA	1	90.9	6.79053e+08
40+A_63-G_203-GAGGAG	1	65.5	6.79053e+08
207+AATGAGAAGTTGGGAGGGAGAGA	1	92.4	6.79053e+08
20-CTG_33+AGGATCGCCCCGCGAAAATGCATGGGGAACAGGGCAAAAATGCCCGCCAT_51+ATTCAG_66+C_110+ATGCA_153+C_213+CCA_263-ACTAC_322+CGGCCCAGGGTTCATCA	1	41.4	6.79053e+08
27+T_48+G_104-TGT_130+CACT_147+TGATGGATT	1	47.5	6.79053e+08
113-TACGTTAACTGTCTTGGTGGTGAGGATGAGTCGGGCTGTGGGATGGATCAGATGCTACGATCGATGTCGCAGCGAGGTGAGGAAGAAAGTGAGGAG	1	70.5	6.79053e+08
207+AGGGAGGAAGAAAGAA	1	94.3	6.79053e+08
205-GGAGGAG_323+G	1	97.6	6.79053e+08
207+AAAGAC	1	98.2	6.79053e+08
89-C_197-GAAAGTGAGGAG	1	95.2	6.79053e+08
175-GATGTCGCAGCGAGGTGAGGAAGAAAGTGA	1	88.6	6.79053e+08
20-CTG_33+AGGATCGCCCCGCGAAAATGCATGGGGAACAGGGCAAAAATGCCCGCCAT_51+ATTCAG_66+C_110+ATGCA_155+TCACTACGTCCGGCAGCAAATA_211-GGGTGG	1	43	6.79053e+08
186-GAGGTGAGGAAGAAAGTGA	1	89.5	6.79053e+08
206+AAAAA	1	98.2	6.79053e+08
192-AGGAAGAAAGTGA	1	94.3	6.79053e+08
106-T_207+A	1	98.2	6.79053e+08
152-G_200-AGTGAGG	1	97.6	6.79053e+08
34+G_48+A_120-ACT_134-GA_161+TTCGG_174+TTTGTTTTGC	1	47.5	6.79053e+08
52-G_204-AGGA	1	97.6	6.79053e+08
23+GAAACCACGGCGGAGAAACCTGCTGTTGTCGCCGCAAAACCAGCCGCT_55+CCT_162-AGAT_184+ATAACCGCCG_207+CAC_247-TAC_263-ACTA_319-GAG	1	41.7	6.79053e+08
165-TGCTACGATCGATGTCGCAGCGAGGTGAGGAAGAAAGTGAGGAG	1	85.5	6.79053e+08
277+A	1	88.6	6.79053e+08
191-GAGGAAGAAAGTGAGGA_325-A	1	94.6	6.79053e+08
240+A_283-G	1	89.2	6.79053e+08
107-A_186-GAGGTGAGGAAGAAAGTGAG	1	93.7	6.79053e+08
207-A_277-C	1	90.1	6.79053e+08
250-A_329+G	1	91.6	6.79053e+08
134-GAGGATGAGTCGGGCTGTGGGATGGATCAGATGCTACGATCGATGTCGCAGCGAGGTGAGGAAGAAAGTGAG_324+T	1	78.1	6.79053e+08
20+CAGTGT_62+G	1	58.2	6.79053e+08
208-GG_323-G	1	97.6	6.79053e+08
206+Tgagagaggaagagaga	1	92.3	6.79053e+08
190-TGAGGAAGAAAGTGA_329-G	1	93.7	6.79053e+08
200-AGTGAGGAGGAG_261+A_305-G	1	85.6	6.79053e+08
201-GTGAGGAGGAGGGTGGTAGTG	1	89.5	6.79053e+08
98-A_198-AAAGTGAGGA	1	96.7	6.79053e+08
7+G_65-ATCTGGGGTGGAGGGATCTGTCTACCACCGGGCAAGAAGTGTAACGGATACGTTAACTGTCTTGGTGGTGAGGATGAGTCGGGCTGTGGGATGGATCAGATGCTACGATCGATGTCGCAGCGAGGTGAGGAAGAAAGTGAGGA	1	56.8	6.79053e+08
14-G_180-CGCAGCGAGGTGAGGAAGAAAGTGAGGA	1	89.8	6.79053e+08
208+GAGGAAGGAAG	1	95.9	6.79053e+08
40+A_65-A_188-GGTGAG_208+T	1	68.6	6.79053e+08
250-A_314+G	1	90.4	6.79053e+08
118-TAACTGTCTTGGTGGTGAGGATGAGTCGGGCTGTGGGATGGATCAGATGCTACGATCGATGTCGCAGCGAGGTGAGGAAGAAAGTGAGGAG	1	72.3	6.79053e+08
107-A_194-GAAGAAAGTGAGGAGGA	1	94.3	6.79053e+08
191-GAGGAAGAAAGTGAG_222-C	1	93.1	6.79053e+08
63-GTATCTGGGGTGGAGGGATCTGTCTACCACCGGGCAAGAAGTGTAACGGATACGTTAACTGTCTTGGTGGTGAGGATGAGTCGGGCTGTGGGATGGATCAGATGCTACGATCGATGTCGCAGCGAGGTGAGGAAGAAAGTGAGGAG_327-A	1	53	6.79053e+08
199+AAGTGAGTTTGTATAGAAAAGGGGAGCCGAGGTGAGGAAGTGACTTTGTATAGAAAAGTTGGGT	1	83.1	6.79053e+08
77-G_203-GAGGA	1	96.7	6.79053e+08
198-AAAGTGAGGA_271-A	1	93.4	6.79053e+08
197-GAAAGTGAGGAG_321-G	1	87.7	6.79053e+08
77-G_200-AGTGAGG	1	96.1	6.79053e+08
107-A_185-CGAGGTGAGGAA	1	92.8	6.79053e+08
22+A_57+ACAGGGCAAAAATGCCCGCCATCAGCGCGGCC_75+TAGACCTGGAACACGGTGAAT_125+GC_175+AAAT_202+CC_236+C_263-ACTAC_322+CGGCCCCCGGCACATCA	1	42.7	6.79053e+08
193-GGAAGAAAGTGAG_320-A	1	94.3	6.79053e+08
208-GGAGGGTG_327-A	1	95.2	6.79053e+08
162-AGATGCTACGA_192-AGGAAGAAAGTGAGGA	1	88	6.79053e+08
40+A_65-A_203-GAGGAG	1	77.5	6.79053e+08
209+A	1	96.4	6.79053e+08
188-GGTGAGGAAGAAAGTGAG_325-A	1	93.1	6.79053e+08
144-CGGGCTGTGGGATGGATCAGATGCTACGATCGATGTCGCAGCGAGGTGAGGAAGAAAGTGAGG_324-T	1	79.5	6.79053e+08
202+AACTTTATTATACAAAGTTGTGGCGCGCCCGCTAACTGATGGAACCTTTGGTACCATCGGTGGCGTAACCAGGGGGGGA	1	79.1	6.79053e+08
191-GAGGAA	1	96.4	6.79053e+08
203+G	1	99.1	6.79053e+08
200+AGAGCCCAAAGGTTACCCCAGTTGGGGGGCGCGCCCAACTTTGTATAGAAAAGTTGGGTG	1	84.2	6.79053e+08
30+A_56+AACAGGGCAAAA_80-AT_97-C_143-T_167+TGGCCCATCCT_185+GCTTGCGCGGCT_227+CCGC_271+CGGTGGTCGGGTAGCTCAGGAA_322+CGGCCCCCGGCTCATCA	1	43.3	6.79053e+08
189-GTGAGGAAGAAA_326-G	1	94.9	6.79053e+08
203-GAG_329-G	1	98.8	6.79053e+08
312+A_322-T	1	89.2	6.79053e+08
220-T	1	88.3	6.79053e+08
30+A_57+ACAGTGTAAAAATGCCCGCC_75+TCATTCAGCGTGTAGACTTGGAACACGGTGAAT_107+TTCATGCATCACCCGTGGGCCGTCCTTTTGA_186-GAGGT_218-AGTGC	1	39.8	6.79053e+08
204+GGTGGTAGTGCC	1	95.1	6.79053e+08
218-AG_229-G_257+G_322-T	1	90.1	6.79053e+08
20-CTG_45+CATCA_104-TGT_134-GA_173+GTGGATTTTGTTTTG	1	44.9	6.79053e+08
8-GTA	1	97.9	6.79053e+08
207+ATGGAAGATTGTGAGAACAA	1	91.5	6.79053e+08
33+T_71+AAAACACCGTCACGC_96+CCTGGACA_138+CCACCATTACCCTGAGCTTTAAGGCCGGGA_168+AAAACCAGCTGCAGTCTGCGG_185+GACGTGCAGACTCAGGGCGT_198+ACCGGTGACACCA_247+G_279+G_293-ACGA_319+AG	1	41	6.79053e+08
197-GAAAGTGAGGAG_307-G	1	84.6	6.79053e+08
74-G_207+A	1	97.6	6.79053e+08
207-A_244-G	1	99.4	6.79053e+08
29+TATC_73-TGGAGGGATCTGTCTA_202-TGAGGA	1	47.3	6.79053e+08
11-AAT	1	99.1	6.79053e+08
169-ACGATCGATGTCGCAGCGAGGTGAGGAAGAAAGTGAGGAG	1	87.3	6.79053e+08
186-GAGGTGAGGAAGAAAGTGAG_321-GT	1	93.4	6.79053e+08
110-G	1	99.7	6.79053e+08
10-A_208-GG	1	97.6	6.79053e+08
193-GGAAGAAAGT	1	93.1	6.79053e+08
200+AGTTGGGAG	1	97.4	6.79053e+08
72-GT_196-AGAAAGTGAGG	1	92.8	6.79053e+08
199+AACAACTTTATTATGTAAAGTGGTGGCGCGGCGCCCAACGGGGGTAAACTTGGGACGACCGGGGTGGGTACTAGATGTCTGGGG	1	78.6	6.79053e+08
202-TGAGGA_254+AC	1	84.1	6.79053e+08
21-TG_45+TAT_65-A_208-GGAGGG	1	69.6	6.79053e+08
205-G_320-A	1	99.4	6.79053e+08
10-A_208+ATCAGACGCC	1	96.5	6.79053e+08
20-CTG_45+CGAAAATGCATGGGGAACAGGGCAAA_53+CCATCAGCGC_75+TAGACCTGGAACACGGTGAAT_110+ATGCA_153+C_213+CCA_263-ACTAC_322+CGGCCCCCGGTTCATCA	1	41.9	6.79053e+08
10-A_202-TGAGGA_326-G	1	96.7	6.79053e+08
29+TAGC_81-TCTGTCT_139+CCATCTTTTAAGGTTTAT_152-GGGATG_187-AGGTGA_205-GG_229-GAGAGCTTCGG_270-TA_307-GCCGGA	1	44.1	6.79053e+08
248+ACAATGCCAGTGGAACTCACAGACATACAAATATCGAA	1	81.1	6.79053e+08
107-A_203-GAGGAG	1	96.7	6.79053e+08
20-CTG_33+AGGATCGCCCCGCGAAAATGCATGGGGAACAGGGCAAAAATGCCCGCCAT_51+ATTCAG_66+C_110+ATGCA_153+C_213+CAA_263-AC_296+C_320+GCCCCAGGCTCAT	1	42.7	6.79053e+08
202-TGAGGA_247-T	1	92.2	6.79053e+08
15-CGCCACTGC_85+CTTGAAAAA	1	81.8	6.79053e+08
202-TGAGGA_261+A_282-C	1	86.5	6.79053e+08
66-TC_196-AGAAAGTGAGG	1	94.9	6.79053e+08
21-TG_29-C_85+CTT	1	87.8	6.79053e+08
205+GGAGGGTGGAG	1	94.5	6.79053e+08
202-TGAGGA_258-C	1	91.9	6.79053e+08
51-CG_202-TGAGGA	1	96.7	6.79053e+08
77-G_199-AAGTGAGG	1	95.8	6.79053e+08
21-TGCCAGCACGTA_71+CGCCCC	1	51.5	6.79053e+08
203-GAGGAG_307-G	1	93.1	6.79053e+08
20-CTG_33+AGAATCGCCCCGCGAAAATGCATGGGGAACAGGGCAAAAATGCCCGCCAT_51+ATTCAG_66+C_110+ATGCA_153+C_213+CCA_263-AC_296+C_320+GCCCCCGGATCAT	1	42.7	6.79053e+08
203-GAGGAGGAG_322-T	1	95.5	6.79053e+08
133-T_323-G	1	94.3	6.79053e+08
20+C_57+ACAGGGCAAAAATGCCCGCCATCAGCGCGGCC_75+TAGACCTGGAACACGGTGAAT_110+ATGCA_153+C_213+CCA_263-ACTAC_322+CGGCCCCCGGCTCATCA	1	41.5	6.79053e+08
209-GAGGGTGGT_257+ACAACGAAG	1	84.8	6.79053e+08
180-CGC_201-GTG	1	87	6.79053e+08
202-TGAGGA_317-GC	1	87	6.79053e+08
20-CTG_40+CCCCGCGAAAATGCAT_70+C_91+GTGTAG_114+GGGCG_122+GAGGCGAGCAGTGTTTCATGCATCACCCGAGGCCTGTCCGTT_152+ACGTCC_170+AG_236-TC_271+TA	1	42.7	6.79053e+08
200+AGTGCCCAAAGGTTACCCCAGTTGGGGGGCGCGCCCAACTTTGTATAGAAAAGTTAGGTG	1	84.2	6.79053e+08
201-GTGAGGAGGAGGGTGGTAGTGCC_277+A	1	82	6.79053e+08
24+GGAT_34+A_59-C_84-GTC_110-GGAT	1	53.4	6.79053e+08
203-GAGGAG_248+ACTAAG	1	92	6.79053e+08
201+CAACTTTATTATAGAAAGTTGTGGCGCGCCCACCAACTGGAGT	1	84.8	6.79053e+08
137-GATGAGTCGGGCTGTGGGATGGATCAGATGCTACGATCGATGTCGCAGCGAGGTGAGGAAGAAAGT	1	78.6	6.79053e+08
197+GAGCGCGAAGGTTACCCCAGTTGGGGGGCGCGTCCATCTTTGTATAGAAAAGTTGG	1	84.5	6.79053e+08
33-CTGCGCGGGCTGACTGTCCGGGG_98-AAGAAGTGTAACG_159-A_243-TGGATACAACGGAAGCTGA_289-AACGACGACGT	1	38.9	6.79053e+08
194-GAAGAAAGTGAGGA_234-C	1	83.1	6.79053e+08
206-GA_326-G	1	91.6	6.79053e+08
200+AGTGAGGACGTGGGGACGCGACCCATGGGTGAGGTGGAGTACGCGCCCGGGGAGCCCAAAGGTTACCCCAGTTGGGGGGCGCGCCCAACTGTGTATAGAAAAGTTGGGTG	1	74.9	6.79053e+08
203+GAGGGG	1	97	6.79053e+08
69-G_203-GAGGA	1	98.2	6.79053e+08
207+A_258-CT_280+A	1	88.3	6.79053e+08
229-GAGAGC	1	94	6.79053e+08
203-GAGG_321-G	1	97.6	6.79053e+08
170-CGAT	1	94.6	6.79053e+08
204+AATGTTTGAAGAAAGTGAAAGTGAA	1	88	6.79053e+08
207+TTAGTATAGAAAAGATGTGTGGATGAGA	1	92.2	6.79053e+08
20-CT_35-G_45+CATCA_120+GTGTTGG	1	44.1	6.79053e+08
14-GCGCC_130+CCAATTAGGT_144+TACAAGTGAGTGTAG_179-T_210+T	1	44.8	6.79053e+08
187-AGGTGAGGAAGA	1	95.8	6.79053e+08
260+G_307-G	1	89.2	6.79053e+08
122-TGTCTTGGTGGTGAGGATGAGTCGGGCTGTGGGATGGATCAGATGCTACGATCGATGTCGCAGCGAGGTGAGGAAGAAAGTGAGGA_324-TA	1	73.5	6.79053e+08
133-T_200-AGTGAGG	1	90.4	6.79053e+08
208+ACGTTTGAGGACGTGTTTTAGTATTTCCTGAATAAAATTACCATTTTTCGAAAACTGCTCGTCAAGCACGGGGTTTACTTTATTATGTTTTGTTTGCGACCCAACCCGCTC	1	74	6.79053e+08
248-ACAACG	1	90.4	6.79053e+08
206+GTAGAGTACGCGCCCGGGAGGACCAAAGGTTACCCTAGTTGGGGGGCATGCTCCGATTTGTATAGAAAAGATGCGAGGAAGAA	1	79	6.79053e+08
205-GGAGGAGG_324-T	1	95.8	6.79053e+08
7-G_138-ATGAGTCGGGCTGTGGGATGGATCAGATGCTACGATCGATGTCGCAGCGAGGTGAGGAAGAAAGTGAGGA	1	78.6	6.79053e+08
208+AAGTCG	1	97.9	6.79053e+08
107-A_194-GAAGAAAGTGAGGA	1	95.5	6.79053e+08
20-CTG_33+ATTATCGCCCCGCGAAAATGCATGGGGAACAGGGCAAAAATGCCCGCCAT_51+ATTCAG_66+C_110+ATGCA_155+GCTCTAC_236+CATG_244+C_279+GACC	1	42.2	6.79053e+08
218-AG_321-G	1	90.4	6.79053e+08
207-A_323-GTA	1	98.2	6.79053e+08
34-TGCG_68-TGGGG_119+CTCCG	1	47.6	6.79053e+08
189-GTGAGGAAGAAA_244-G	1	94.9	6.79053e+08
180-CGCAGC	1	94	6.79053e+08
20-CTG_40+CCCCGCGAAAATGCAT_80-AT_97-C_143-T_167+TGGCCCGTCCT_185+GCTTGCGCGGCT_226+GCCG_252+AACATCAGGTCGCTCATGTCGG_322+CGGCCCCCGGCTCATCA	1	42	6.79053e+08
203-GAGGAG_253+GAA	1	88.4	6.79053e+08
202-TGAGGA_307-GCCGGA	1	82.8	6.79053e+08
183-AGCGAGGTGAGGAAGAAAGTGAGGA_285-A	1	91	6.79053e+08
94-G_207+A	1	98.2	6.79053e+08
20-CTG_33+AGGATCGCTCCGCGAAAATGCATGGGGAACAGGGCAAAAATGCCCGCCAT_51+ATTCAG_66+C_110+ATGCA_153+C_213+CCA_263-ACTAC_322+CGGCCCCCGGCTCATCA	1	41.7	6.79053e+08
208+CGGGTAAGTGAGGAAGAAAGTGAGGAAGAAAG	1	91.2	6.79053e+08
39-GGGCTG_82+G_100+CCG_118+C_174+G_181-GCA_203-GAGGAGGAGGGTGGTAGTGCCACACAG_272-T_299-T_321-G	1	45.9	6.79053e+08
203-GAG_247-TAC	1	90.4	6.79053e+08
20-CTG_40+CCCCGCGAAAATGCAT_80-AT_97-C_143-T_163+CC_172+TCCTTTTGA_185+GCTTGCGCGGCT_227+CCGC_252+AACATCAGGTCGCTCATGTCGG_322+CGGCCCCCGGCTCATCA	1	43	6.79053e+08
261-A	1	93.4	6.79053e+08
133-TGAGGATGAGTCGGGCTGTGGGATGGATCAGATGCTACGATCGATGTCGCAGCGAGGTGAGGAAGAAAGT	1	77.7	6.79053e+08
207+ATGC	1	97.9	6.79053e+08
207+A_240-ATGTGGA	1	90.7	6.79053e+08
98-A_202-TGAGGA	1	96.7	6.79053e+08
291-C	1	89.8	6.79053e+08
208+TCAT	1	97.6	6.79053e+08
207+GGGTAGGAGA	1	96.8	6.79053e+08
181-GCAGCGA_198-A_324-T	1	93.4	6.79053e+08
21-TGCCAG_43-TGA_75-GAGGGATC_106-T_158+CTGCC_180-C_200+aaaaaCCCCAGGC_224+GGTTTCCAA_283-G_301-AAGC	1	44.8	6.79053e+08
205+C	1	70.9	6.79053e+08
30+A_56+AACAGGGCAAAA_80-AT_97-C_143-T_167+TAGGCCGTCCT_239+CCGCCAAAAGGCTGCCAAAGATGAGAGAAAACATCAGGTCGCA_267+TAAGCCATCACG	1	40.9	6.79053e+08
203-GAG_245-GAT	1	91.6	6.79053e+08
131-G_204-AGGA	1	97.3	6.79053e+08
195+AAGAAAGTGTTAC	1	94.2	6.79053e+08
201+CAACTTTATTATACAAAGTTGTGGCGCGCCCCCCAACTGGGGTAACCTTTGGGCTGCCCGGGCGCGTAGCCTTTGGACG	1	79.3	6.79053e+08
202-TGAGGA_310-G	1	88.9	6.79053e+08
191-GAGGAAGAAAGTGAGGAGGAGG_321-GT	1	89.2	6.79053e+08
188-GGTGAGGAAGAAAGTGAGG_323-G	1	94	6.79053e+08
13-T_203-GAGGAG	1	96.1	6.79053e+08
200-AGTG_324-T	1	95.5	6.79053e+08
52-G_189-GTGAGGAAGAAA	1	94.3	6.79053e+08
201+CAACTTT_229+ACTGGG_237+TGGGCTACCCGGGCG	1	84.4	6.79053e+08
131-GGTGAGGATGAGTCGGGCTGTGGGATGGATCAGATGCTACGATCGATGTCGCAGCGA	1	81.9	6.79053e+08
202-TGAGGA_258+T	1	89.8	6.79053e+08
221+GAGAGA	1	91.1	6.79053e+08
200+AGTGAGGAGAGGAGGTTACCCCAGTTGGGGGGCGAGCCCAACTTTGTATAGAAAAGTTGGGTG	1	80.5	6.79053e+08
235+T_307-G	1	90.1	6.79053e+08
20+C_57+ACAGGGCAAAAATGCCCGCCATCAGCGCGGCC_75+TAGACCTGGAACACGGTGAAT_110+ATGCA_153+C_202+CCA_263-ACTAC_322+CGGCCCCCGGCTCATCA	1	41.5	6.79053e+08
203-GAGGAG_260+G_325-A	1	87.7	6.79053e+08
203-GAG_231-G	1	85.8	6.79053e+08
20-CTG_33+AGGATCGCCCCGCGAAAATGCATGGGGAACAGGGCAAAAATGCCCGCCAT_51+ATTCAG_66+C_110+ATGCA_153+C_213+CCA_263-ACTAC_309+CAAA_321+CCCCCGGCTCATC	1	41.9	6.79053e+08
201+GGTGGGTGG	1	95.6	6.79053e+08
207+AGAAGA	1	97.6	6.79053e+08
202-TGAGGA_254-GAAGCTGAGACTACCGTATTGTTCACATCGGAAGAAACGACGACGT	1	72	6.79053e+08
198-AAAGTGAGGAGGAGGGTGGTAGTGCCACACAGAGAGCTTCGGATGTGGATACAACGGAAGCTGAGACTAC	1	77.4	6.79053e+08
209+GTGGTCGTGCCACACAGA	1	94.3	6.79053e+08
20-CTG_33+AGGATCGCCCCGCGAAAATGCATGGGGAACAGGGCAAAAATGCCCGCCAT_51+ATTCAG_66+C_110+ATGCA_153+C_213+CCA_263-ACTAC_322+CGGCCCCAGGCTCATCA	1	41.7	6.79053e+08
208-GGAGGGTGGTAGTGCCACACAGAGAGCTTCGGATGTGGATACAAC_322-T	1	82.5	6.79053e+08
200-AGTGAGG_285-A	1	97.3	6.79053e+08
52-GG	1	99.1	6.79053e+08
202-TGAGGA_306+T	1	91.3	6.79053e+08
207+A_253+GAAAAAAAGAGAGACGGTGATGTGCAGAAAAG	1	83.3	6.79053e+08
200+AGTGAGGACTATGTATAGAAAAGTTGGGTG	1	91.7	6.79053e+08
30+A_56+AACAGGGCAAAA_80-AT_97-C_143-T_167+TGGCCCATCCT_185+GCTTGCGCGGCA_227+CCGC_252+AACATCAGGTCGCTCATGTCGG_322+CGGCCCCCGGCTCATCA	1	43.1	6.79053e+08
34+G_48+G_104-TGT_134-GA_161+TTCGG_174+TTTGATTTGC	1	48	6.79053e+08
202-TGAGGA_249-C	1	88	6.79053e+08
195+AAGAAAGTGAGGATACTATAGGGAGAGT	1	92.2	6.79053e+08
195-AAGAAAGTGAGGA_306-T	1	88.6	6.79053e+08
209-GA_323-G	1	93.1	6.79053e+08
207-AGGAGGGTGGTAGTGCCACACAGAGAGCTTCGGATGTGGATACA_322+T	1	82.6	6.79053e+08
202-TGAGGA_318-C	1	88.6	6.79053e+08
207+A_298-G	1	96.7	6.79053e+08
322-TGT	1	97.9	6.79053e+08
202-TGAGGA_280-A	1	89.2	6.79053e+08
22-GCCAGCACGTAC_73-TGGAGGGATCTGT	1	48.2	6.79053e+08
21-TGCCAGCACGTA_64-TATCTGGGGTGGA	1	46.4	6.79053e+08
34+G_48+G_100-GAAGTGTAAC_166-GC	1	44.1	6.79053e+08
171-GATCGATGTCGCAGCGAGGTGAGGAAGAAAGTGAG_324-T	1	84.9	6.79053e+08
206+GAAGGT	1	95.6	6.79053e+08
207+AA_226-A	1	92.2	6.79053e+08
191-GAGGAAGAAAGTGAGG_321-G	1	94.6	6.79053e+08
202-TGAGGA_250+GACGAA	1	92.6	6.79053e+08
200+AGGGAGGAGCGAAGAGGTGACCTCAGTTGGGGGGCGGGTCCAACGTTGTATAGAAAAGTTGGGTG	1	83.1	6.79053e+08
249-CAACGGAAGCT	1	87.3	6.79053e+08
201+G_207+TGAGAAAGAA	1	95.3	6.79053e+08
37-GCG_70+CC_97-CAAGAAGT_207+GTCATGC_298-GTTA	1	42.8	6.79053e+08
282-C	1	89.8	6.79053e+08
98-A_209+A	1	91.3	6.79053e+08
272+C	1	52.9	6.79053e+08
203+GAGGAAAAGTTGGGGGAAA	1	94	6.79053e+08
49+T_197-GAAAGTGAG	1	73	6.79053e+08
125-C_200-AGTGAGG	1	97	6.79053e+08
200+AGTGAGAGTATAAGGGCGAAGTTGGGTG	1	90.8	6.79053e+08
206+GAGGAGTAATGACACACA	1	93.4	6.79053e+08
200+AGTGAGTTTGTATAGAAAAGGTGAGGAGAGGTGAGGAAGTGACTTTGTATAGAAAAGTTGGGTG	1	82.8	6.79053e+08
69-G_171-GATCGATGTCGCAGCGAGGTGAGGAAGAAAGTGAG	1	88.9	6.79053e+08
166-GCTACGATCGATGTCGCAGCGAGGTGAGGAAGAAAGTGAGGA_326-G	1	85.2	6.79053e+08
202+GGAGTTTGTATAGGAAAGGTGGGGCGGAGTGAAGAAGAGGCTTGATATAGAAGAGTGGGGAGGA	1	82.3	6.79053e+08
152-G_206-GA	1	97.6	6.79053e+08
10-A_201+CAACTTTATTATACAAAGTT_209+CCCCCCAACTGGGGTAACCTTTC	1	85.3	6.79053e+08
206+GCTGGTGGAGTGAGGTGAGGTGGAGGTGGAAGCGAGGTGGAAAAAAGTGAGGT	1	84.9	6.79053e+08
193-GGAAGAAAGTGAG_327-A	1	95.8	6.79053e+08
207+AGAGTA	1	97.6	6.79053e+08
246-ATA	1	90.1	6.79053e+08
323+G	1	98.2	6.79053e+08
19-ACTGCCAG_79-GATCTGTCTACCA_118-TAAC_162-AG_192+CAT_233-GCTTCGGATGTG_264-C_275-TTCAC	1	46	6.79053e+08
107-A_325-A	1	99.1	6.79053e+08
207+AAGATC	1	98.2	6.79053e+08
66-TCTGGGGTGGAGGG_128+TAAA_165-TGCTAC_208+T_224+TTGT	1	44.7	6.79053e+08
25-AGCA_65+CCAGCACGCG_83+CACGCGGTCA_115-CGTTAACTGT_244+ATGGC_277-CA_286-AGAAACG_314+AG_323+TCC	1	45	6.79053e+08
201-GTGAG_239-GATGTGGATACA	1	87.3	6.79053e+08
63-G	1	96.4	6.79053e+08
152-G_196-AGAAAGTGAGG	1	93.4	6.79053e+08
183-AGCGAGGT_202-TGA	1	93.7	6.79053e+08
208+ACGTTTGAGGACGTGTTTTAGTATTTACTGAATAAAATTAGCATGTGTCGAAAACGGCTCGTCAAGCGCAGGGTATACTTTATTATGTGTTGTAGGGGGCCCAACACGCAC	1	70.9	6.79053e+08
204+AGGAGGGTGGT	1	96.8	6.79053e+08
198+AAAGTCGTGATGAGT	1	94.5	6.79053e+08
152-GG_201-GTGAGGAGGAGG	1	94.3	6.79053e+08
201-GTGAG_301-A	1	96.4	6.79053e+08
78+TGC_97+TCGT	1	53.1	6.79053e+08
185+AGTACGCGCC_197+AGGTTACCCCAGTTGGGGGGCGCGCCCAACTTTGTATAGAAAAGTTGG	1	81.5	6.79053e+08
203-GAG_297-CGTT_320+TCAA	1	89	6.79053e+08
216-GTAGT_323-G	1	85.5	6.79053e+08
172+C_215-G	1	44.3	6.79053e+08
19+CCCAAAAGGATAGAA_38+ACCTCAAC_70+CTCT_110-G_128-GGTGGTGAGGA_152-GGGATG_208-GGAGGGTG_229-GAGAGCTTCGG_270-TA_311-GAAGAA	1	44.3	6.79053e+08
250-A_270+T	1	91.6	6.79053e+08
206+TACTAACGT	1	96.2	6.79053e+08
193-G	1	99.7	6.79053e+08
208+GCTGTGT	1	96.2	6.79053e+08
200-AGTGAGG_240+A_263-A	1	85.6	6.79053e+08
20-CTG_33+AGGATCGCCCCGCGAAAATGCATGGGGAACAGGGCAAAAATGCCCGCCAT_51+ATTCAG_71+T_110+ATGCA_153+C_213+CCA_263-ACTAC_322+CGGCCCCCGGCTCATCA	1	41.9	6.79053e+08
21-TGCCAGCACGTA_66-TCTGGGGTGGAGG	1	47.3	6.79053e+08
200-AGTGAGG_267+GGCTTCGGATATCGATGGAACAAACGCAAATAGTG	1	81.2	6.79053e+08
247-TACAAC	1	89.5	6.79053e+08
190-TGAGGAAGAAAGTGA_324-T	1	93.4	6.79053e+08
206+GCTGGTGGGGTGAGATGAGACGGAGGTGGAAGCAGGGAGGAGGAGAATAAAGT	1	84.9	6.79053e+08
152-GGGATGGATCAGATGCTACGATCGATGTCGCAGCGAGGTGAGGAAGAAAGTGAGGA_325-A	1	81	6.79053e+08
204+ACACAGTGAGGAGGGGGGTAGTGCCACCTCA	1	91.2	6.79053e+08
202-TGAGGA_260+G	1	87.7	6.79053e+08
207+TAAGAA	1	97.9	6.79053e+08
20+C_56+AACAGGGCAAAA_70+C_91+GTGTAG_115+GTCGC_135+TTTCATGC_172-A_223+CCAT_252+AACATCAGGTCGCTCATGTCGG_322+CGGCCCCAGGCTCATCA	1	42.4	6.79053e+08
43+AT_120+GTGTTGG	1	42.2	6.79053e+08
19+AGCCGGAGTGTTGTCGAGAGCAGCATCAATGGT_63+CCGCGAAGAGATAGCACATTTCATTA_118+GG	1	39.7	6.79053e+08
326+G	1	96.4	6.79053e+08
207+AGGAA	1	97	6.79053e+08
202-TGAGGA_314-G_329+G	1	91.3	6.79053e+08
14-G_208+G	1	97.9	6.79053e+08
152-G_189-GTGAGGAAGAAA	1	94.9	6.79053e+08
203-GAGGAG_254+GAAAACA	1	89.1	6.79053e+08
20-CTG_33+AGGATCGCCCCGCGAAAATGCATGGGGAATAGGGCAAAAATGCCCGCCAT_51+ATTCAG_66+C_115+TCACC_153+C_213+CCA_263-ACTAC_322+CGGCCCCCGGCTCATCA	1	41.9	6.79053e+08
89-C_203-GAGGAG	1	96.7	6.79053e+08
203-GAGGAG_325-A	1	96.7	6.79053e+08
193-GGAAGAAAGTGAGGAG	1	94	6.79053e+08
10+G_48-G	1	86.2	6.79053e+08
36+ACAGA_45+C_94-GGGCAA_121+ACAAT_174+AAAGG_223+TCCTCTTGCTTTGTTTCCTGCA_246+T_311-GA	1	43.5	6.79053e+08
200-AGTGAGGAGG_321-G	1	96.7	6.79053e+08
40+A_65-A_208+CAGTAT	1	67.8	6.79053e+08
207-A_309-CGG	1	88	6.79053e+08
7+G_200-AGTGAGG	1	96.4	6.79053e+08
199-AAGTGAGGAGG_220-T_298+G_325-A	1	86.5	6.79053e+08
10-A_138-ATGAGTCGGGCTGTGGGATGGATCAGATGCTACGATCGATGTCGCAGCGAGGTGAGGAAGAAAGTGAGGA	1	74.4	6.79053e+08
204+AGAGGA	1	97.3	6.79053e+08
20-CTG_33+AGGATCGCCCCGCGAAAATGCATGGGGAACAGGGCAAAAATGCCCGCCAT_51+ATTCAG_66+C_110+ATGCA_153+C_213+CCA_263-ACTAC	1	41.7	6.79053e+08
196-AGAAAGTGAGG_312-A	1	94.6	6.79053e+08
199-AAGTGAGG_321-G	1	89.5	6.79053e+08
197-GAAAGTGAG_253+AGA	1	86	6.79053e+08
200+AGTGAGTTATCAACTTGAAAAAGTGGCACCGAGTCGGTGCttttttttACGCGTGGGTCCCATGGGTGAGGTGGAGTACGCGCCCGGGGAGACCAAAGGTTACCCCAGTTGGGGGGCGCGCCCAACTTTGTATAGAAAAGTTGGGTG	1	68.5	6.79053e+08
207+A_321-GT	1	97.6	6.79053e+08
208-GGAGG_329-G	1	93.7	6.79053e+08
200+AGTGAGTTATCAACTTGAAAAAGTGGCACCGAGTCGGTGCttttttttACGCGTGGGTTCAATGGGTGAGGTGGAGTACGTGCCCGGGGAGCCCAAAGGTTACCCCAGTTGGGGGGCGCGCCAAACTTTGTATAGAAAAGTTGGGTG	1	68.5	6.79053e+08
20-CT_32-A_45+CATCA_100-G_125+TGGCATTTGTTGCTC_155-A_171-GAT	1	48.3	6.79053e+08
20-CTG_33+AGGATCGCCCCGCGAAAATGCATGGGGAACAGGGCAAAAATGCCCGCCAT_51+ATTCAG_66+C_110+ATGCA_153+C_202+CCA_263-ACTAC_322+CGGCCCCCAGATCATCA	1	41.4	6.79053e+08
20-CTGC_65+TCTG_181-GCAGCGAGGTGAGGAAGAAAGTGAGGAGG	1	59.2	6.79053e+08
202+TGAGGA	1	97.9	6.79053e+08
20+C_57+ACAGGGCAAAAATGCCCGCCATCAGCGCGGCC_75+TAGACCTGGAACACGGTGAAT_110+ATGCA_153+C_210+CTGCCA_236-TCG_263-ACTAC_309+CAAA_320+GCCCAAGGCTCAT	1	42.9	6.79053e+08
203-GAG_324-TA	1	97.9	6.79053e+08
169-A	1	98.8	6.79053e+08
208+AAGTCC	1	88.2	6.79053e+08
207+AAAGAA_323-G	1	96.2	6.79053e+08
202-TGAGGA_255+AATAAA	1	84.3	6.79053e+08
209+GAGGTAGTGCGACACAGA	1	94.6	6.79053e+08
240-ATGTGGATACAACGGAAGCTGAGACTACCGTATTGTTCACAT	1	79.5	6.79053e+08
34+G_48+G_125+GGCACTTGTTGCTC_167-CTAC	1	44.8	6.79053e+08
207+GTAGA	1	97.9	6.79053e+08
52-G_197-GAAAGTGAGG	1	88.9	6.79053e+08
283-G	1	97	6.79053e+08
207+GTGGA_301-A	1	97.3	6.79053e+08
203-GAGGA_264-C	1	90.4	6.79053e+08
310+G_322-T	1	85.6	6.79053e+08
189-GTGAGGAAGAAAGTGAGGA_327-A	1	89.2	6.79053e+08
182-CAGCGAGGTGAGGAAGAAAGTGAGGAGGAGGGTGGTAGTGCC	1	77.7	6.79053e+08
48+AG_81-TC_101-AA_128-G_175-GAT_186-GAGGTGAGGAAGA_235-TT_255-AA_277-CA	1	47.3	6.79053e+08
197-GAAAGTGAG_322-T	1	86.1	6.79053e+08
24-CAGCACGTACTGCGCGG_85+CTTGaaaaaaaaaaaaa	1	66.2	6.79053e+08
205+GGAGTGGAGGGAGAAGGGTGTAGTGGAGT	1	89.7	6.79053e+08
17+C_33-CTG_52-GGGGA_81+CTCTGC_103-GTGT_119-AACTGTCTTGGTGGTGAGGATGAGTCGG	1	46.5	6.79053e+08
20-CTG_33+AGGATCGCCCCGCGAAAATGCATGGGGAACAGGGCAAAAATGCCCGCCAT_51+ATTCAG_66+C_110+ATGCA_153+C_213+CCA_263-ACTAC_322+CTGCCCCCGGCTCATCA	1	41.7	6.79053e+08
202-TGAGGA_298-G	1	89.5	6.79053e+08
85-TC	1	98.5	6.79053e+08
202-TGAGGA_307-G	1	86.4	6.79053e+08
185-CGAGGTGAGGAA	1	94.9	6.79053e+08
193-GGAAGAAAG	1	95.5	6.79053e+08
29+TATC_102-AGTG_156+AATC_200-AGT_229-GAGAGC_239-GAT_262-GACT_307-GCCGGA	1	45.9	6.79053e+08
199-AAGTGAGG_295-G	1	95.5	6.79053e+08
39-G	1	67.8	6.79053e+08
189-GTGAGGAAGAAAGTGAGGA_329-G	1	92.8	6.79053e+08
206+AAAGAGAAGTTAGGAAGATAAT	1	93.2	6.79053e+08
201+CAACTTTAT_234+TAACCTTTGGGCA_259+CATGCGATCGCTCCG	1	81	6.79053e+08
190-T	1	98.5	6.79053e+08
125-C_197-GAAAGTGAG	1	95.2	6.79053e+08
35+G_48+G_107-AAC_134-GA_173+GTGTATTTTGTGTTG	1	48	6.79053e+08
202-TGAGGA_252+AAAGAG	1	85.8	6.79053e+08
201+CAACTTTATTATACAAAGTT_209+CCCCCCAACTGGAGTAACCTTTC	1	85.6	6.79053e+08
205+ggagtggagggaggagggtgtagtggagt_241+gaaaagggggagggggggggggggggggggggggagggggagaggagggggggggaggggggggggggggggg	1	63.6	6.79053e+08
19+TGCCTAACCCGCGCATGGTTTCGCTCG_29+TGG_75-GAGGGAT_99-AGAAGTGTAACGGATACGTT_162-AGATGCTACGA_179-T	1	43.9	6.79053e+08
10-A_329-G	1	99.4	6.79053e+08
15-C_171-GATCGATGTCGCAGCGAGGTGAGGAAGAAAGTGAG	1	88	6.79053e+08
155-ATGGATCAGATGCTACGATCGATGTCGCAGCGAGGTGAGGAAGAAAGTGAGGA_323-G	1	82.5	6.79053e+08
203-GAG_322-T	1	98.8	6.79053e+08
206+GGAGAAA	1	97.6	6.79053e+08
201+GGGGAG_207+AAGAA	1	95.9	6.79053e+08
208+ATGAGACGATGGGTGGATGAGAT	1	93	6.79053e+08
21-TGCCAGCACGTA	1	54.3	6.79053e+08
200+AGTGAGGGTCCCATGGGTGAGGTGGAGTACGCGCCCGGGGAGCCCAAAGGTTACCCCAGATGGAGGGCGCGCCCAGATTTGTATAGAAAAGATGGGTG	1	77.2	6.79053e+08
203-GAGGAG_257-G	1	90.7	6.79053e+08
20+C_56+AACAGGGCAAAA_80-AT_97-C_143-T_167+TGGCACGTCCT_185+GCTTGCGCGGCT_233+AAAG_252+AACATCAGGTCGCTCATGTCGG_322+CGGCCCCCGGCTCATCA	1	43.1	6.79053e+08
206+gtggtaggagagaaaggaagaaaggaagagaggaagaaagggaa	1	87.2	6.79053e+08
203+GAGGTGGAGTACGCGCGAGGGGAGCCCAAAGGTTACCCCAGTTGGGAGGCGAGCACAGATTTGTATAGAAAAGTAGGGAGAGA	1	70.6	6.79053e+08
28-ACGTACTGCG_130-T_167-C_216-GTA_319+TGCACG	1	45.9	6.79053e+08
21-TGCCAGCACG_49-TCCGGGGAT_111-GATACGTT_152-G_230+GT_295-GACGTTAAGCG	1	42.8	6.79053e+08
20-CTG_33+AGGATCGCCCCGCGAAAATGCATGGGGAACAGGACAAAAATGCCCGCCAT_51+ATTCAG_66+C_110+ATGCA_153+C_213+CCA_263-ACTAC_322+CGGCCCCCGGCTCATCA	1	41.7	6.79053e+08
261+A_299-T	1	91.6	6.79053e+08
20-C_41-GCT_59-CGATGTAT_85-TCTACCACCGGGCAAGAAGTGTAACGGATACGTTAACTGTCTT_179-TCGCAGC_218-AGTGC_296+CGGA_321+GAT	1	42.8	6.79053e+08
201-GTGAGG_297-CGTT_320+TAGA	1	83	6.79053e+08
20-CTG_33+AGGTTCGCCCCGCGAAAATGCATGGGGAACAGGGCAAAAATGCCCGCCAT_51+ATTCAG_66+C_110+ATGCA_153+C_213+CCA_263-ACTAC_322+CGGCCCCAGGCTCATCA	1	41.7	6.79053e+08
107-AACGGATACGTTAACTGTCTTGGTGGTGAGGATGAGTCGGGCTGTGGGATGGATCAGATGCTACGATCGATGTCGCAGCGAGGTGAGGAAGAAAGTGAGG	1	67.2	6.79053e+08
207+ATAGGC	1	97.3	6.79053e+08
203+GAGGAAAAGTTGGGTGAGA	1	94	6.79053e+08
203-GAGGAG_263+A_307-G	1	88	6.79053e+08
201+ATACTACAATCTATAAAGCTGTGACGCGAGCAACAAC	1	81	6.79053e+08
189-GTGAGGAAGAAA_325-A	1	84	6.79053e+08
203-GAG_256-AG	1	90.1	6.79053e+08
85-TC_110-GGAT_171+A_231-GAGC_258+ACA_277+CTTTTATTACAC_303-GCGTGCC	1	45.7	6.79053e+08
203-GAGGA_327-A	1	98.2	6.79053e+08
197-GAAAGTGAGG_325-A	1	95.2	6.79053e+08
52-G_196-AGAAAGTGAGG	1	94.9	6.79053e+08
222+C	1	90.1	6.79053e+08
10-A_176-ATGTCGCAGCGAGGTGAGGAAGAAAGTGAGGA	1	84.6	6.79053e+08
214+T_323-G	1	89.5	6.79053e+08
252+AAAAGG	1	89.6	6.79053e+08
201+CAACTTT_229+ACTGGGGTAACCTTT_240+GCGCGT	1	81.4	6.79053e+08
209+AGGCAT	1	92.3	6.79053e+08
201+CAACTTTATTATACAAAGTT_236+CCACGGGC	1	84.2	6.79053e+08
20-CTG_40+CCCCGCGAAAATGCAT_80-AT_97-C_143-T_167+TGGCCCGTCCT_185+GCTTGCGCGGCT_226+CCCG_252+AACATCAGGTCGCTCATGTCGG_322+CGGCCGCCGGCTCATCA	1	42.3	6.79053e+08
202+AAAGAGA	1	96.2	6.79053e+08
136-GGATGAGTCGGGCTGTGGGATGGATCAGATGCTACGATCGATGTCGCAGCGAGGTGAGGAAGAAAGTGAG_323-G	1	76.8	6.79053e+08
202-TGAGGA_324-TA	1	96.4	6.79053e+08
206+GCTGGTGGAGTGAGGTGAGGTGGAGGTGGAAGCGAGGTGGAAGAAAGTGAGAT	1	85.2	6.79053e+08
201+CAACTTTATTAGACAAAGTTGTGGCTCGCGCCCCAAC_208+ACCAAG	1	85.9	6.79053e+08
192-AGGAAGAAAGTGAGGA_318-C	1	89.2	6.79053e+08
209-GAGGGT	1	89.4	6.79053e+08
201+GTGAGTTTGTATAGAAAAGGTGAGGCGAGGTGAGGAAGTGACTTGGTATAGAAAAGTTGGGTGG	1	82.8	6.79053e+08
202-TGAGGA_257+T_297-CG_319+AG	1	86.9	6.79053e+08
207+gggggagagagggaggtgaaggggagtggaggagGTTGGTAGGGTGATGCAGAGGGACTGGGAGGAAGAAA	1	75.4	6.79053e+08
45-ACTGTCCGGGGATGCGATGTAT_192+AATGAAGTGA_230-A_287+AGT_304+ACAATGT	1	41.8	6.79053e+08
207+A_256-AGCTGAGACTACCGTATTGTTCACATCGGAAGAAACGACGAC	1	84.1	6.79053e+08
190-TGAGGAAGAAA_207-A	1	92.2	6.79053e+08
208+AGACAG	1	97.9	6.79053e+08
202-TGAGGA_305-GTGCCGG	1	86.7	6.79053e+08
207+T	1	98.2	6.79053e+08
128-G_197-GAAAGTGAG	1	95.2	6.79053e+08
207-A_322-T	1	98.5	6.79053e+08
77-G_207-A	1	98.2	6.79053e+08
13-T_204-AGGA	1	97	6.79053e+08
211-GGGTGGT	1	85.5	6.79053e+08
31-T_208-GGAGGG	1	76.5	6.79053e+08
191-GAGGAAGAAAGTGAGGA_322-T	1	90.4	6.79053e+08
198-AAAGTGAGGA_259+T_321-G	1	86.8	6.79053e+08
208+AGGAG	1	86.6	6.79053e+08
211-G_323-G	1	97.9	6.79053e+08
206+GATCAGAAAATACGT	1	94.5	6.79053e+08
35-GCGCGGGCTGACTGTCCGGGGATG_106+CTGCTGCTGCTGC_125+G_163-GAT_234-CTTCGGATGTGGATAC_310-GGAA	1	41.9	6.79053e+08
169-ACGATCGATGTCGCAGCGAGGTGAGGAAGAAAGTGAGG_323-G	1	87	6.79053e+08
169-ACGATCGATGTCGCAGCGAGGTGAGG	1	88.3	6.79053e+08
69-G_183-AGCGAGGTGAGGAAGAAAGTGAGG	1	91	6.79053e+08
206+TACTCACAT	1	97.1	6.79053e+08
20-CTG_33+AGGATCGCCCCGCGAAAATGCATGGGGAACAGGGCAAAAATGCCCGCCAT_51+ATTCAG_66+C_110+ATGCA_153+C_213+CCA_263-AC_298-GTTAAG	1	42.7	6.79053e+08
52-GGGGATGCGATGTATCTGGGGTGGAGGGATCTGTCTACCACCGGGCAAGAAGTGTAACGGATACGTTAACTGTCTTGGTGGTGAGGATGAGTCGGGCTGTGGGATGGATCAGATGCTACGATCGATGTCGCAGCGAGGTGAGGAAGAAAGTG	1	53.3	6.79053e+08
13-T_196-AGAAAGTGAGG	1	95.2	6.79053e+08
271-A_295+A	1	89.8	6.79053e+08
33+ATCGCCCCGCGAAAATGCATGGGGAACAGGGCAAAAATGCCCGCCAT_51+ATTCAG_66+C_110+ATGCA_153+C_210+CTGCCA_220+AAAACATCA	1	40.3	6.79053e+08
199-AAGTGAGGAG_305+A	1	84	6.79053e+08
208-GGAGG_324-T	1	96.7	6.79053e+08
201+CATCTGTAGTATCCAACGTTGTGGCGCGGAGGTCAACAGGAGT	1	85.9	6.79053e+08
20-CTG_33+AGGATCGCCCCGCGAAAATGCATGGGGAACAGGGCAAAAATGCCCGCCAT_51+ATTCAG_66+C_110+ATGCA_153+C_213+CCA_263-ACTAC_322+CGGCCCCCTGCTCATCA	1	41.7	6.79053e+08
20-CTG_40+CCCCGCGAAAATGCAT_80-AT_97-C_143+AGCAGTGTTTCATGCATCACCC_213+ctcccccctcccctcctcccttcttctccca_263-AC_296+C_320+GCCCCCGGCTCAT	1	39.5	6.79053e+08
131-G_180-CGCA	1	94.9	6.79053e+08
152-G_205+G	1	91.6	6.79053e+08
14-G_197-GAAAGTGAG	1	95.5	6.79053e+08
180-CGCAGCGAGGTGAGGAAGAAAGTGAGGA_322-T	1	82.5	6.79053e+08
202+AACTCTAT_217+CGCACGCCCCAACTGGCGTAACCT_240+TACCT	1	77.5	6.79053e+08
69-G_201-GTGAGG	1	96.4	6.79053e+08
89-C_202-TGAGGA	1	96.7	6.79053e+08
38-CGGGCTGACTGTCCGGGGATGCGATGTATCT	1	43.6	6.79053e+08
209+TGGTAGTGACACACA	1	95.4	6.79053e+08
260+G_298-G	1	88.3	6.79053e+08
206+GAGGGT	1	97	6.79053e+08
202-TGAGGA_327+A	1	96.7	6.79053e+08
278+A	1	90.4	6.79053e+08
20-CTGCCAGC_73-TGGAGGGATCTGTC_124-TC_154+CC_173-TCGATGTCGCAGC_213+AA_242+GCTGGCCGACTTCC_283-G_324+C	1	43.9	6.79053e+08
198-AAAGTGA_329-G	1	96.4	6.79053e+08
202-TGAGGA_256+AAGGAG	1	87.6	6.79053e+08
59-CGATGTATCTGGGGTGGAGGGATCTGTCTACCACCGGGCAAGAAGTGTAACGGATACGTTAACTGTCTTGGTGGTGAGGATGAGTCGGGCTGTGGGATGGATCAGATGCTACGATCGATGTCGCAGCGAGGTGAGGAAGAAAGTGA	1	55.1	6.79053e+08
175-G_200-AGTGAGG	1	96.4	6.79053e+08
94-G_200-AGTGAGG	1	95.5	6.79053e+08
197-GAAAGTGAG_292+G_307-G	1	90.7	6.79053e+08
10-A_192-AGGAAGAAAGTGAGGA	1	94.9	6.79053e+08
190-TGAGGAAGAAAGTGA_219-G_285+A_322-T	1	83.8	6.79053e+08
203-GAGGA_271-A	1	96.4	6.79053e+08
19+CCCAAAAGGATAGCA_38+ACCTCAAC_70+CCCT_127-TGGTGGTGAGGA_152-GGGATG_189-GT_231-GAGCTTCGGATGTGGAT_270-TA_311-GAAGAA	1	43.2	6.79053e+08
159-AT_179-TCGCAGCGAGGT	1	83.5	6.79053e+08
35+CGCCCCGCGAAAATGCATGGGGAACAGGGCAAAAATGCCCGCCATCA_51+ATTCAG_66+C_110+ATGCA_153+C_213+CCA_263-ACTAC_309+CAAA_320+GCCCCAGGATCAT	1	43	6.79053e+08
33+ATCGCCCCGCGAAAATGCATGGGGAACAGGGCAAAAATGCCCGCCAT_51+ATTCAG_66+C_110+ATGCA_155+GCACTAC_220-TGC_263-AC_296+C_320+GCCCCAGGCTCAT	1	41.7	6.79053e+08
208+TGGC	1	98.5	6.79053e+08
207+tggtaggaaagaaaggaagaaaggaagaaaggaagaaaaaagaa	1	87.2	6.79053e+08
203+GAGGGTGGAGGGTGAGG	1	93.4	6.79053e+08
201+CAACTTTATTATACAAAGTTGTGGCGCGCACACCAACTGGGGTAACCTTTGGGCTCCCCGGGCGCGTACTCAACCTCACTCATGCGATCGCTCCGGAAAGATACATTGATGAGTTTGGACAAACC	1	70.7	6.79053e+08
196-AG	1	95.2	6.79053e+08
202-TGAGGA_257+G	1	86.4	6.79053e+08
203-GAG_263-A	1	90.1	6.79053e+08
206-GAGGAGGGTGGTAGTGCC	1	86.7	6.79053e+08
21+GTGAAGGGGAACGGCTCG_109+ACCTGCCCACG_122-T_142-G_176-ATGTCGCA_228-AGA_286-AG_311-GAAGAAGC	1	44.3	6.79053e+08
203+A	1	95.8	6.79053e+08
21-TGCCAGCACGTA_73-TGGAGGGATCTGTC	1	46.4	6.79053e+08
73-T_202-TGAGGA	1	96.4	6.79053e+08
199-AAG	1	97.3	6.79053e+08
208+AAGAAGTGATAG	1	93.9	6.79053e+08
123-GTCTTGGTGGTGA_205-GGAGGAGGGTG	1	41.3	6.79053e+08
188-GGTGAGGAAGAAAGTGAG_258+ATGAGACTGCAA	1	83.7	6.79053e+08
214-T	1	98.2	6.79053e+08
201+GTGAGGAAAAGATGGGAGG	1	94.6	6.79053e+08
203+GGG	1	98.2	6.79053e+08
207+AGGTGC	1	91.7	6.79053e+08
207+GGAA_323-G	1	92.6	6.79053e+08
207+A_247-T	1	91.3	6.79053e+08
10-A_207-A	1	97.9	6.79053e+08
206+GAAAAT	1	97.9	6.79053e+08
208+AAAGTGAGGTAGGAGAGAAAGAAAGTAAGAAGGAAC	1	83.4	6.79053e+08
43+AT_104-TGT	1	42.6	6.79053e+08
207+AAAAGA	1	96.7	6.79053e+08
193-GGAAGAAAGTGAG_322-T	1	92.8	6.79053e+08
157-GGATCA	1	92.5	6.79053e+08
207-A_327-A	1	99.4	6.79053e+08
250-A_317+G	1	89.5	6.79053e+08
20-CT_35-G_45+CATCA_104-T_125+TGGCA_134+TCTTTGTACGCAA_152+A_171-GAT	1	48.8	6.79053e+08
63-GTATCTGGGGTGGAGGGATCTGTCTACCACCGGGCAAGAAGTGTAACGGATACGTTAACTGTCTTGGTGGTGAGGATGAGTCGGGCTGTGGGATGGATCAGATGCTACGATCGATGTCGCAGCGAGGTGAGGAAGAAAGTGAGGAG	1	55.7	6.79053e+08
252-C	1	93.7	6.79053e+08
201+CAACTTTATTATACAAAGTTGTGGCGCGCCCCCCAACTGGGGTAACCTTTGGGCTCCCCGGGCGCGTACTCCACCTCACCCAAGCGATCGCTCCGGAAAGATACATTGATGAGTTTGTACAAACC	1	70.5	6.79053e+08
206+GACAGGTACAGTTCAGAT	1	94.6	6.79053e+08
201-GTGAG_321-GT	1	97.9	6.79053e+08
10-A_196-AGAAAGTGAGG	1	94.9	6.79053e+08
134+G	1	97.9	6.79053e+08
205-GG_282-C	1	90.1	6.79053e+08
164-ATGCTA	1	87.7	6.79053e+08
207+A_278-A	1	91.6	6.79053e+08
205+GGGTGAG	1	91.2	6.79053e+08
92-C_199-AAGTGAGG	1	94.3	6.79053e+08
87-T_197-GAAAGTGAGG	1	95.5	6.79053e+08
199-AAGTGAGG_244-G	1	95.8	6.79053e+08
13-T_201-GTGAGG	1	97.2	6.79053e+08
74-G_201-GTGAG	1	93.7	6.79053e+08
209-GAGGGT_274-G	1	88.3	6.79053e+08
13-T_197-GAAAGTGAGG	1	96.4	6.79053e+08
322+GA	1	90.1	6.79053e+08
106-T_148-CTGTGGGATGGATCAGATGCTACGATCGATGTCGCAGCGAGGTGAGGAAGAAAGTGAGGA	1	81	6.79053e+08
155-A_203-GAGG	1	93.7	6.79053e+08
123+GCGCGTTCCAACCGTGG_138+GACT_187+TT_202+C_246-ATAC_267+GCTCG_294+AAT_309+GACGAGTCCCTCTCTGCCCCCGATCG	1	45.4	6.79053e+08
205-GGAG_329-G	1	80.9	6.79053e+08
99+TTCAGCGTGT_143+GGCAGTGTTTCATGCAACACCCGTGGCCCATGCTTTTGAATC_160+CGGGACGACGTCAGGGAGCAAATAACAGC_211-GGGTGG	1	40.9	6.79053e+08
10-A_194-GAAGAAAGTGAGGA	1	94.3	6.79053e+08
208+ATTAT_231+GCAGGAATAACCTTT_250+TCCACCTCACCCAAGCG	1	79.7	6.79053e+08
201+CAACTTTATTATAGAAGGTTGAGGCACGCCACGCAGCAG	1	87.6	6.79053e+08
203+GAGGAAAGAATGGGTGGAA	1	94.6	6.79053e+08
203+GTA	1	96.7	6.79053e+08
259+T_318-C	1	86.5	6.79053e+08
10-A_180-CGCAGCGAGGTGAGGAAGAAAGTGAGG	1	90.7	6.79053e+08
227+TCACT_243+ATTTT_264+GATTGC	1	48.1	6.79053e+08
203-GAG_321-G	1	96.7	6.79053e+08
204+AGCACATTTTAATAAGGACAAATTTGGTTATTTTTTCTCTTTTGTTGTTATACAATAATCAAATATTAGTAGAATTGTAGATAACATATATAAGATGTTGCACAAAACA	1	73.7	6.79053e+08
10-A_205-G	1	99.4	6.79053e+08
240-ATGTGGATACAA	1	89.2	6.79053e+08
10-A_164-ATGCTACGATCGATGTCGCAGCGAGGTGAGGAAGAAAGTGAGGA	1	85.5	6.79053e+08
287-G	1	97	6.79053e+08
144-CGGGCTGTGGGATGGATCAGATGCTACGATCGATGTCGCAGCGAGGTGAGGAAGAAAGTGAGG_321-G	1	77.4	6.79053e+08
191-GAG_203-GAG	1	96.4	6.79053e+08
204-AGGAGGAGGGT	1	87.3	6.79053e+08
171-GATCGATGTCGCAGCGAGGTGAGGAAGAAAGTGAG_222-C	1	86.1	6.79053e+08
20-CT_35-G_45+CATCA_125+GGCA_134+CCTTTGTAC_171-GAT	1	46.3	6.79053e+08
199-AAGTGAGG_258+GTGCGAGAAAGAGAGATGGGAAAGGGGAAAAAACGGAAA	1	78.4	6.79053e+08
202-TGAGGA_263+A_307-G_321+G	1	89.2	6.79053e+08
53-GGGA_79-GATCTGTCTACC_105-G_124-T_159+TTTCATTTCTA_192+CCA_216+A_305+TAGTTA	1	45	6.79053e+08
207+AGA	1	99.1	6.79053e+08
190-TGAGGAAGAAAGTGA_323-G	1	93.4	6.79053e+08
200+AGTGAGGTTACTCCAGTTGGGGGGCGCGCCCAACTTTGTATAGAAAAGTTGGGTG	1	85	6.79053e+08
21+CAGGACGAAAGGA_75+ACAGGGAGTCATTCAGCGTGTAGACCTGGAAAACGGTGAAT_110+ATGCA_155+GCTCTACGTCCGGCA_212+A_248-ACAA_281+CCAC	1	41.4	6.79053e+08
202-TGAGGA_326+G	1	96.4	6.79053e+08
119-AACTGTC_159-ATCAGATGCTACGATCGATGTCGCAGCGAGGTGAGGAAGAAA	1	78.6	6.79053e+08
196-AGAAAGTGAGG_299+T_322-T	1	86.5	6.79053e+08
117-T_152-GGGATGGATCAGATGCTACGATCGATGTCGCAGCGAGGTGAGGAAGAAAGTGAGGA	1	82.5	6.79053e+08
208+G_324-T	1	99.1	6.79053e+08
201+CAACTTTATTATACAAAGTTGTGGCGCGCCCACCTACTGGGGTAACCTTTGGGCTCCTCGTGCGCATACTCAGCCTCACTCATGCGATCGCTAGGTAATGAGACATAGATGACAGTGGACTAAGG	1	71.1	6.79053e+08
130-T	1	98.8	6.79053e+08
20+CCAGGACGACAGGATCGCCCCGCGAAAATGCATGGGGAACAGGGCAAAAATGC_66+C_110+ATGCA_155+GCTCTACGTC_217-TAGTGC_248-ACAAC_322+CGGCCCCAGGCTCATCA	1	40.2	6.79053e+08
319-GA	1	95.8	6.79053e+08
202-TGAGGA_262+G	1	86.7	6.79053e+08
200+AGTGAGGAGACCAGAGGTTACCCCAGTTGGGGGGCGCGCCCAACTTTGTATAGAAAAGTTGGGTG	1	83.1	6.79053e+08
204-AGGA_282-C	1	88.6	6.79053e+08
19+CCCAAAAGGATAGAA_136-GG_152-GGGATG_191-GA_213-GTGGTA_229-GAGAGCTTCGG_270-TA_298-GTTAAG	1	45.2	6.79053e+08
206+GGT	1	97.6	6.79053e+08
206+GAGTGAAGGGAGAAGGATGTAGTGGAGAA	1	91.7	6.79053e+08
260+G_326-G	1	94.6	6.79053e+08
20-CTG_40+CCCCGCGAAAATGCAT_70+C_81-TCT_97-C_143-T_167+TGGCCCGTCCTTTTGAATCGC_185+CT_227+CCGC_252+AACATCAGGTCGCTCATGTCGG_322+CGGCCCCCGGCTCATCA	1	43.4	6.79053e+08
200+AGTGAGGTGAACCGAGCTGGGGGGCGAGTCCAACTTTGTACAGAAAAGTTAGGTG	1	84.8	6.79053e+08
201+GAG	1	88.1	6.79053e+08
198-A_323-G	1	97.9	6.79053e+08
69-GGGGTGGAGGGATCTGTCTACCACCGGGCAAGAAGTGTAACGGATACGTTAACTGTCTTGGTGGTGAGGATGAGTCGGGCTGTGGGATGGATCAGATGCTACGATCGATGTCGCAGCGAGGTGAGGAAGAAAGTGAGGA_329-G	1	57.5	6.79053e+08
206+GCTGGTGGAGTGAGCAGAGGCGGAGGTGGAGGCGAGGTGGAAGAAAGGAAGAA	1	85.5	6.79053e+08
110-GGATACGTTAACTGTCTTGGTGGTGAGGATGAGTCGGGCTGTGGGATGGATCAGATGCTACGATCGATGTCGCAGCGAGGTGAGGAAGAAAGTGAGGA_329-G	1	70.2	6.79053e+08
20+C_57+ACAGGGCAAAAATGCCCGCCATCAGCGCGGCC_75+TAGACCTGGAACACGGTGAAT_110+ATGCA_155+GCTC_263-AC_296+C_320+GCACCCAGATCAT	1	41.6	6.79053e+08
208-GGAGGGTGG_329-G	1	95.8	6.79053e+08
192-AGGAAGAAAGTGAGGA_249-C	1	94.9	6.79053e+08
133-T_207-A	1	98.2	6.79053e+08
201+CAACTTTATTATACAAAGTT_236+CCCCGGGC	1	84.2	6.79053e+08
205+GGGTGGAGGGTGGGAGT	1	93.4	6.79053e+08
206+TGGTAGTGACCC	1	94.8	6.79053e+08
205+GCAAAG	1	94.7	6.79053e+08
69-G_203-GAGG	1	98.5	6.79053e+08
106-T_203-GAGG	1	97.3	6.79053e+08
315+CC	1	87.3	6.79053e+08
21+GCCGTACACGAG_112-A_129+AC	1	46.7	6.79053e+08
106-T_134-GA_161+TTCGG_174+TTTGTTTTGC	1	46	6.79053e+08
220-TGCCAC_325-A	1	88	6.79053e+08
189-GTGAGGAAGAAAGT	1	93.7	6.79053e+08
25-AGCACGTA_87+GGGAT_117+C	1	49	6.79053e+08
134-GA_202-T	1	89.8	6.79053e+08
13-T_189-GTGAGGAAGAAA	1	94.6	6.79053e+08
20-CTG_33+AGGATCGCCCCGCGAAAATGCATGGGGAACAGGGCAAAAATGCCCGCCAT_64+ACCTGGA_110+ATGCA_153+C_213+CCA_263-ACTAC_322+CGGCCCCCGGCTCATCA	1	41	6.79053e+08
169-ACGATCGATGTCGCAGCGAGGTGAGGAAGAAAGTGAGG_242-G_269+T_283-G	1	76.9	6.79053e+08
20-CTG_45-ACTGTC_149+CGTTAACGA_168-T_193-GGAAGAAAG_232-AGC_275-T_296-ACGT	1	45.5	6.79053e+08
203+GAGGCTGGTGGAGGGAGCTGAGGTGGAGGTGGAAGCGAGGTGGAAAAAAGAGA	1	85.2	6.79053e+08
49-T	1	98.2	6.79053e+08
220+GGCCCCACAGCGAGATGAGGATGTGaaaaaaaaTGATGT	1	79.8	6.79053e+08
45-ACTGTCCGGGGATGCGATGTAT_193-GG_226+TG_283-GG	1	41.9	6.79053e+08
207+AAAAGT	1	98.2	6.79053e+08
207+AAAAGTTGGGTGGAAGAGA	1	93.4	6.79053e+08
145-GGGCTGTGGGATGGATCAGATGCTACGATCGATGTCGCAGCGAGGTGAGGAAGAAAGTG	1	80.7	6.79053e+08
202+ATAGCGA	1	95.6	6.79053e+08
208+ATGAGAAGTTGGGTGAGTGAGG	1	92.4	6.79053e+08
7-G_200-AGTGAGG	1	95.8	6.79053e+08
202-TGAGGA_299-T	1	96.7	6.79053e+08
20-CTG_76+TGAAA_174+TTTGTTTTGC	1	43.1	6.79053e+08
206+GGA	1	97.9	6.79053e+08
207+TAAGAC	1	97.9	6.79053e+08
201+CAACTTTATTATACAAAGTTGTGGCGCGCCCCCCAACTGGGGTAACCTTTGGGCTCCCCGGGC_325-A	1	82.3	6.79053e+08
77-G_202-TGAGGA	1	96.7	6.79053e+08
129-GTGGTGAGGATGAGTCGGGCTGTGGGATGGATCAGATGCTACGATCGATGTCGCAGCGAGGTGAGGAAGAAAGTGA	1	75	6.79053e+08
137-GATGAGTCGGGCTGTGGGATGGATCAGATGCTACGATCGATGTCGCAGCGAGGTGAGGAAGAAAGTGAGGA_323-G	1	77.1	6.79053e+08
68+T	1	98.5	6.79053e+08
20-CTG_33+AGGATCGCCCCGCGAAAATGCATGGGGAACAGGGCAAAAATGCCCGCCAT_51+ATTCAG_66+C_110+ATGCA_153+C_213+CAA_263-ACTAC_322+CGGCCCCCGGCTCATCA	1	41.7	6.79053e+08
204+AGGTTACCCCAGTTGGGGGGCGCGCCCAACTTTGTATAGAAAAGTTGGGTGAGTA	1	85	6.79053e+08
128-GGTGGTGAGGATGAGTCGGGCTGTGGGATGGATCAGATGCTAC_195-AAGAAA	1	80.4	6.79053e+08
23+AAAA_40-GGCTGACTGTC_135-AGGATGAGT_176-A	1	46.6	6.79053e+08
296-A	1	90.7	6.79053e+08
218-A_263+A_310-G	1	88	6.79053e+08
210-A_324-T	1	97.6	6.79053e+08
201+CAACTTT_229+ACTGGGGTAACCTTT_259+CATGCGATCGCTCCG	1	80.2	6.79053e+08
67-CTGGGGTGGAGGGATCTGTCTACCACCGGGCAAGAAGTGTAACGGATACGTTAACTGTCTTGGTGGTGAGGATGAGTCGGGCTGTGGGATGGATCAGATGCTACGATCGATGTCGCAGCGAGGTGAGGAAGAAAGTGAGGAG	1	56	6.79053e+08
204+AGGAGA	1	97.9	6.79053e+08
202-TGAGGA_247-TACAACG_322+T	1	87.1	6.79053e+08
212+GAC	1	98.2	6.79053e+08
208+TAGAAG	1	96.4	6.79053e+08
203-GAG_244-G	1	97.3	6.79053e+08
202+T_321-G	1	96.7	6.79053e+08
208+GTTTTAAGTAT	1	96.8	6.79053e+08
200+AGTGAGGTGGAGTACGCGCGCGGGGAGCCCAAAGGTTACCGAAGTTGGGGGGCGCGCCCAAGTTTGTATAGAAAAGTGGGGAG	1	79	6.79053e+08
200-AGTGAGG_219+G_282-C	1	85.6	6.79053e+08
207+GCTGGTAGGTGAGGAAGAAAGTGAGGAAGAAA	1	88.7	6.79053e+08
144-C	1	98.2	6.79053e+08
202-TGAGGA_292-G	1	86.7	6.79053e+08
34+G_48+G_104-TGT_134-GA_163+CGGTG_174+TTTGTTTTGC	1	48.5	6.79053e+08
207-A_250-AACGG	1	91.9	6.79053e+08
27+GATAGCAATTGTA_46+ACTACACCAC_70+CCCT_127-TGGTGGTGAGGA_152-GGGATG_187-AGGTGA_205-GG_229-GAGAGCTTCGG_270-TA_311-GAAGAA	1	44	6.79053e+08
195-AAGAAAGTGAGGA_324-T	1	95.8	6.79053e+08
9-T_189-GTGAGGAAGAAA	1	95.2	6.79053e+08
197-GAAAGTGAG_267-C	1	85.8	6.79053e+08
153-GGATGGATCAGATGCTACGATCGATGTCGCAGCGAGGTGAGGAAGAAAGT	1	82.5	6.79053e+08
301-AAGCGTGCCGGA	1	91	6.79053e+08
206+GAATGAGAAGTAGGGTGAGTGAA	1	93.2	6.79053e+08
56-A_207-A	1	94.9	6.79053e+08
208+T_329-G	1	96.1	6.79053e+08
66-TCTGGGGTGGAGGGATCTGTCTACCACCGGGCAAGAAGTGT_111-GATACGTTAA_143-TCGGGCTGTGGGATGGATC_173-TCGATGTCGC_205-GGAGG_234-CTTC_260-G_301-AAGCGTGCC	1	42.2	6.79053e+08
169-ACGATCGATGTCGCAGCGAGGTGAGGAAGAAAGTGAGGAGG	1	86.4	6.79053e+08
9-T_207+GGGTAGGAAA	1	96.5	6.79053e+08
201+CAACTTTATTATACAAAGTT_236+CGACGGGC	1	84.7	6.79053e+08
206+GCTGGTGGAGTGAGGTGAGGTGGAGGAGGAAGCGTGGAGGAAGGAAGTAAAGT	1	84.4	6.79053e+08
201+CAGCTCTATTATTCAAAGTTGTGGGGCGGCGACCTGCGG	1	86.8	6.79053e+08
186-GAGGTGAGGAAGAAAGTGAG_327-A	1	92.8	6.79053e+08
39-G_189-GTGAGGAAGAAA	1	95.2	6.79053e+08
26+CGAAAGGATCGCCCCGCGAAAAT_53+CCATCAGCGC_75+TAGACCTGGAACACGGTGAAT_110+ATGCA_151+C_213+CAA_264+AAAATAGCCATCCCGCT_284-GAAGA	1	41.3	6.79053e+08
208-GGAGGGTGGTAGTGCCACACAGAGAGCTTCGGATGTGGATACAAC_323-G	1	84.6	6.79053e+08
208+GGGGGAGTGCCACACAGG	1	93.4	6.79053e+08
20-CTG_40+CCCCGCGAAAATGCAT_70+C_91+GTGTAG_115+GTCGC_135+TTTCATGC_172-ATC_185+GT_232+GAGA_252+AACATCAGGTCGCTCATGTCGG_322+CGGCCCCCGGATCATCA	1	44.1	6.79053e+08
20+C_57+ACAGGGCAAAAATGCCCGCCATCAGCGCGGCC_75+TAGACCTGGAACACGGTGAAT_110+ATGCA_153+C_213+CCA_263-ACTAC_322+CGGCCCCCGGCTCAGCA	1	41.5	6.79053e+08
98-A_206-GA	1	92.5	6.79053e+08
74-G_201-GTGAGG	1	96.7	6.79053e+08
77-G_197-GAAAGTGAG	1	97	6.79053e+08
202+AGAGGTTACCCCAGTTGGAGGGCGCGCTCAGCTTTGTATAGAAAAGTTGGGTGAA	1	84.2	6.79053e+08
26+C_57+ACAGGGCAAAAATGCCCGCCATCAGCGCGGCC_75+TAGACCTGGAACACGGTGAAT_110+ATGCA_153+C_213+CCA_263-ACTAC_322+CGGCCCCCGGCTCATCA	1	41.5	6.79053e+08
187-AGGTGAGGAAGAA	1	80.7	6.79053e+08
69-G_204+A	1	96.7	6.79053e+08
20-CTG_76+TGAAA_104-TGT_134-GA_173+GTGTATTTTGTTTTG	1	45.4	6.79053e+08
35+A_56-A_106-T_130+CACT_147+TAAT_174+TTTGC	1	49.8	6.79053e+08
21+CAGGACGAAAGGA_33+AATGCATGGGGAACAGGGCAAAAATGCCCGCCAT_51+ATTCAG_66+C_110+ATGCA_151+C_205+AAG_263-ACTAC_322+CGGCCCCCAGCTCATCA	1	43.2	6.79053e+08
249-C	1	88.6	6.79053e+08
207+AATGGTAGGTGAGGAAGAAAGTGAGGAAGAGA	1	90.9	6.79053e+08
246+A_326-G	1	89.2	6.79053e+08
206+GAGTTTTAAGT	1	95.9	6.79053e+08
37-GCGGGCTGACTG_64+C_85+CTTGaaaaaaa_203-GAG	1	63.1	6.79053e+08
200+ACAACTTTATTATACAAAGTTGTGGCGCGCCGCTCAACTGGGTGGGTGAAAAGTTGGGTG	1	83.4	6.79053e+08
204+CCACACA	1	96.2	6.79053e+08
204+CCACAGGAGGGTGGGGCT	1	94	6.79053e+08
101-A_195-AAGAAAGTGAGGA	1	94	6.79053e+08
202-TGAGGA_319-G	1	88.3	6.79053e+08
20-CTG_78+A_118-TA_153+TACGTAATAGATTTCGGTGTAA_174-CGA	1	44.8	6.79053e+08
43+AT_125+GACA_135+CTTTGCACGT_155-A_171-GAT	1	46.3	6.79053e+08
61-ATGTATCTGGGGTGGAGGGATCTGTCTACCACCGGGCAAGAAGTGTAACGGATACGTTAACTGTCTTGGTGGTGAGGATGAGTCGGGCTGTGGGATGGATCAGATGCTACGATCGATGTCGCAGCGAGGTGAGGAAGAAAGTGAGGA_323-G	1	55.4	6.79053e+08
263+A_305-G	1	89.5	6.79053e+08
200+ACAGCTCACTCACTTGTATAGAAAAGTTGGGTG	1	90.1	6.79053e+08
201+CAACTTTATTATACAAAGTTGTGGCGCGCCACCCAACTG	1	87.3	6.79053e+08
202-TGAGGA_278-A_319+G	1	91.3	6.79053e+08

## Sheet: CT1 g12
label	abundance	maxid	freq
203-GAGGAG	50959	98.2	0.550622
207+AAAGTC	9268	98.2	0.100143
202-TGAGGA	6795	98.2	0.0734214
Ref	5678	100	0.0613519
203-GAG	2880	99.1	0.031119
191-GAGGAAGAAAGTGAG	2378	95.5	0.0256948
205+CCACTT	2075	97.3	0.0224208
208+AGAAAG	1389	98.2	0.0150084
203+GGA	1350	98.2	0.014587
205+GGGTGAG	971	97.6	0.0104919
206-GA	877	99.4	0.00947616
191-GAGGAA	766	96.7	0.00827679
197-GAAAGTGAGGAG	631	96.4	0.00681808
206+GCTCTGT	270	97.1	0.00291741
181-GCAGCGAGGTGAGGAAGAAAGT	246	92.5	0.00265808
207+AAAGTA	208	98.2	0.00224748
203+ATC	174	96.7	0.00188011
203-GAGGAG_323-G	174	97.9	0.00188011
201-GTGAGG	142	98.2	0.00153434
20-CTG_33+AGGATCGCCCCGCGAAAATGCATGGGGAACAGGGCAAAAATGCCCGCCAT_51+ATTCAG_66+C_110+ATGCA_153+C_213+CCA_263-ACTAC_322+CGGCCCCCGGCTCATCA	128	41.9	0.00138307
10-A_203-GAGGAG	127	97.9	0.00137226
207-A	123	99.7	0.00132904
186-GAGGTGAGGAAGAAAGTGAGGAGGA	121	92.2	0.00130743
203-GAGGAG_324-T	111	97.9	0.00119938
34+G_48+G_104-TGT_134-GA_161+TTCGG_174+TTTGTTTTGC	97	48	0.0010481
166-GCTACGATCGATGTCGCAGCGAGGTGAGGAAGAAAGTGAGGA	80	86.7	0.000864416
207+ATGTGAAGGTTGTTGTTGGATCATTTGCAGTGGAAGCTGACTCTGTACTGAGGTCTGTTGTGACCTCCA	72	81.3	0.000777975
207+A	63	99.7	0.000680728
207+AAAATC	62	98.2	0.000669923
203-GAGGAG_327-A	57	97.9	0.000615897
207+AAAGGC	55	98.2	0.000594286
203-GAGGAG_325-A	54	97.9	0.000583481
205+G	53	98.8	0.000572676
202-TGA	53	98.5	0.000572676
206+GAAAGT	52	98.2	0.000561871
197-GAAAGTGAG	52	97.3	0.000561871
240+GGATT_257-G_314+TCGATACGACT	48	45	0.00051865
208-GGAGGG	48	98.2	0.00051865
203-GAGGAG_326-G	45	97.9	0.000486234
204-AGGAGGA	42	97	0.000453819
20-CT_93+GTCTTCGCGTT	40	51.3	0.000432208
207+AAAGTC_323-G	39	97.9	0.000421403
46-CTGT_65-ATCTGGGG_123-GTC	38	46.9	0.000410598
21-TGCCAGCACGTA_73-TGGAGGGATCTGT	37	49.1	0.000399793
203-GAGGAG_329-G	35	97.9	0.000378182
203-GAGGAG_322-T	35	97.9	0.000378182
206+GATCAGATGCTACGT	34	94.5	0.000367377
200-AGTGAGG	34	97.9	0.000367377
204+ACCACT	33	97.6	0.000356572
201+GCGAG	32	97.3	0.000345767
205+AGG	32	97.9	0.000345767
199-AAGTGAGG	31	97.3	0.000334961
34+G_48+G_120-ACT_134-GA_161+TTCGG_174+TTTGTTTTGC	29	47.5	0.000313351
200-AGTGAG	29	97.6	0.000313351
196-AGAAAGTGAGG	28	96.7	0.000302546
207+AAAGTC_324-T	26	97.9	0.000280935
69-G_203-GAGGAG	26	97.9	0.000280935
204+CGCCAC	25	89.9	0.00027013
162-AGATGCTACGATCGATGTCGCAGCGAGGTGAGGAAGAAAGTGAGG	25	86.4	0.00027013
190-TGAGGAAGAAAGTGA	25	94.6	0.00027013
34+G_54-GGA_106-T_134-GA_161+TTCGG_174+TTTGTTTTGC	24	48.3	0.000259325
207+AAGGTA	24	98.2	0.000259325
203-GAGGAG_321-G	24	97.9	0.000259325
201-GTGAGGAGG	22	96.7	0.000237714
10-A_207+AAAGTC	22	97.9	0.000237714
208+AAGTCG	22	98.2	0.000237714
323-G	22	98.8	0.000237714
206+GGTGAGA	21	97.3	0.000226909
13-T_203-GAGGAG	21	97.9	0.000226909
198-AAAGTGAGGA	21	97	0.000226909
207+AAGGTC	21	98.2	0.000226909
93-CGGGCAAGAAGTGTAACGGATACGTTAACTGTCTTGGTGGTGAGGATGAGTCGGGCTGTGGGATGGATCAGATGCTACGATCGATGTCGCAGCGAGGTGAGGAAGAAAGTGAGGAGGA	20	63.9	0.000216104
205+TACGAG	20	96.4	0.000216104
207+AAAGAC	20	98.2	0.000216104
186-GAGGTGAGGAAGAAAGTGAG	19	92.8	0.000205299
175-GATGTCGCAGCGAGGTGAGGAAGAAAGTGAGG	18	87.7	0.000194494
200-AGTGAGGAGG	18	95.5	0.000194494
202-TGAGGA_323-G	18	96.7	0.000194494
205+CCAATT	18	96.7	0.000194494
327-A	18	98.5	0.000194494
10-A	18	98.5	0.000194494
7-G_203-GAGGAG	18	97.9	0.000194494
34+G_48+G_89+G_110+ATTTCATTAGTGT_155-A_174-CGA	17	48.8	0.000183688
203-GAGGAGG	17	97	0.000183688
164-ATGCTACGATCGATGTCGCAGCGAGGTGAGGAAGAAAGTGA	17	86.1	0.000183688
52-GGGGATGCGATGTATCTGGGGTGGAGGGATCTGTCTACCACCGGGCAAGAAGTGTAACGGATACGTTAACTGTCTTGGTGGTGAGGATGAGTCGGGCTGTGGGATGGATCAGATGCTACGATCGATGTCGCAGCGAGGTGAGGAAGAAAGTGAGGAGG	17	51.2	0.000183688
199-AAGTGAGGAGG	17	96.4	0.000183688
205+CCACGT	17	97.3	0.000183688
196-AGAAAGTGAGGAGG	17	94.6	0.000183688
197-GAAAGT	17	97.6	0.000183688
203-GAGGAG_320-A	16	97.9	0.000172883
207+AAAAGC	16	98.2	0.000172883
100-G_203-GAGGAG	16	96.4	0.000172883
191-GAGGAAGAAAGTGAGGAG	16	94.3	0.000172883
204-AGGA	16	98.5	0.000172883
9-T_203-GAGGAG	16	97.9	0.000172883
203+GACCAC	16	97.6	0.000172883
10-A_202-TGAGGA	15	96.7	0.000162078
133-T_203-GAGGAG	15	97	0.000162078
10-A_203-GAG	14	97.6	0.000151273
207+AAGATC	14	98.2	0.000151273
123-GTCTTGGTGGTGA_248-ACAA_273-TGTTCACA_314+TTTTGT	13	42.8	0.000140468
185+C_225+TTCATGGCCGGTG_296+T_322+GATTTTGTTTTGCTGT	13	43.7	0.000140468
206+GAGT	13	97.6	0.000140468
207+AAAGTC_327-A	13	97.9	0.000140468
324-T	13	99.4	0.000140468
73-T_203-GAGGAG	13	97	0.000140468
124-TCTTGGT_186-G_208-GGAGGGTGGTAGT_266-ACCG_299+GT_315+TT	12	44.9	0.000129662
34+G_48+G_125+GGCA_134+CCTTTGTAC_174-CGA	12	46.5	0.000129662
203-GAGGAGGAGGGTGGTAGTGCCACACAGAGAGCTTCGGATGTG	12	85.5	0.000129662
205-GGAGGAGGGTGGTAGTGCCACACAGAGAGCTTCGGATGT	12	87	0.000129662
203-GAGG	12	98.8	0.000129662
34+G_48+G_104-TGT_130+CACTTGTTGCTCCTT_152+A_171-GAT	11	46.3	0.000118857
191-GAGGAAGAAAGTGAG_326-G	11	94	0.000118857
213+TGGTA	11	96.1	0.000118857
325-A	11	98.8	0.000118857
208+AAGTAG	11	98.2	0.000118857
194-GAAGAAAGTGAGGAGGA	11	94	0.000118857
27-CACGTA_74-GGA_171-GATCG_252+TC	11	43.1	0.000118857
208+AGGTCG	11	98.2	0.000118857
207+AAAGTC_329-G	10	97.9	0.000108052
200+AGTGAGGAGCCCAAAGGTTACCCCAGTTGGGGGGCGCGCCCAACTTTGTATAGAAAAGTTGGGTG	10	82.6	0.000108052
82-CTGTCTACCACCGGGCAAGAAGTGTAACGGATACGTTAACTGTCTTGGTGGTGAGGATGAGTCGGGCTGTGGGATGGATCAGATGCTACGATCGATGTCGCAGCGAGGTGAGGAAGAAAGTGAGGAGGA	10	60.5	0.000108052
208+TGGTTGAGAT	10	95.6	0.000108052
205+ACACTT	10	96.7	0.000108052
52-G_203-GAGGAG	10	97.9	0.000108052
205+GGAAAG	10	98.2	0.000108052
203-GAGGAG_271-A	10	97	0.000108052
189-GTGAGGAAGAAA	10	96.4	0.000108052
201-GTG	10	98.2	0.000108052
29+TAGC_81-TCTGTCT_125-CTTGGTGGTGAGGATGA_153-GGAT_224-ACACA_245+ATA_270+GCGGAACGGCACAC_311-GAAGAA	9	43.1	9.72468e-05
202-TGAGGA_321-G	9	96.7	9.72468e-05
206+GGGT	9	97.9	9.72468e-05
20-CT_70-GGGTGGAGGGATCTGTCTACCA_106-TAACGGATAC_121+TC_140-G	9	49.3	9.72468e-05
198-AAAGTGAGGAGGA	9	95.2	9.72468e-05
202-TGAGGA_324-T	9	96.7	9.72468e-05
205+GGGGGAG	9	96.8	9.72468e-05
322-T	9	98.5	9.72468e-05
207+AAGATA	9	98.2	9.72468e-05
203-GAGGAG_321-GT	9	97.6	9.72468e-05
203-GAGGA	9	97.6	9.72468e-05
207+AAAGAA	9	98.2	9.72468e-05
326-G	8	98.5	8.64416e-05
208+GTGT	8	97.6	8.64416e-05
183-AGCGAGGTGAGGAAGAAAGTGAGGAGG	8	90.7	8.64416e-05
43+AT_125+GACA_134+CCTTTGCAC_171-GAT	8	45	8.64416e-05
10-A_205+CCACTT	8	96.4	8.64416e-05
202-TGAGGA_325-A	8	96.7	8.64416e-05
191-GAGGAAGAAAGTGAG_327-A	8	94	8.64416e-05
204+AGGAAA	8	98.2	8.64416e-05
207+AAAGTC_322-T	8	97.9	8.64416e-05
208+AGGTAG	8	98.2	8.64416e-05
197-GAAAGTGAGG	8	96.4	8.64416e-05
196-AGAAAG	8	96.4	8.64416e-05
20+G_48+G_104-TGT_134-GA_161+TTCGG_174+TTTGTTTTGC	7	47.1	7.56364e-05
202-TGAGGAGGA	7	96.1	7.56364e-05
25-AGCACGTACTGCGCGGGCTGACTGTCCGGG_95+A	7	48.6	7.56364e-05
205+CCACTT_323-G	7	96.4	7.56364e-05
10-A_191-GAGGAAGAAAGTGAG	7	94.6	7.56364e-05
208+AGAAAG_324-T	7	97.9	7.56364e-05
208+AGAAGG	7	98.2	7.56364e-05
203+GAGGAA	7	98.2	7.56364e-05
207+ATAGTC	7	98.2	7.56364e-05
207+ACTTTC	7	97.3	7.56364e-05
207+AGAGTC	7	97.9	7.56364e-05
14-G_203-GAGGAG	7	97.9	7.56364e-05
192-AGGAAGAAAGTGAGGAGGA	7	92.8	7.56364e-05
207+AAGAAA	7	98.2	7.56364e-05
201+GGG	7	96.7	7.56364e-05
43+AT_174+TTTGTTTTGC	6	42.2	6.48312e-05
22+CGTC	6	62	6.48312e-05
39+TAA_116-GTTA_151-TGGGATGGAT_257-GCTGAGACTACCG_290-ACGACG	6	42.4	6.48312e-05
20-CTG_33+AGGATCGCCCCGCGAAAATGCATGGGGAACAGGGCAAAAATGCCCGCCAT_51+ATTCAG_66+C_110+ATGCA_153+C_213+CCA_263-ACTAC_322+CGGCCCCGGCTCATCA	6	41.8	6.48312e-05
208+AGAAAG_323-G	6	97.9	6.48312e-05
202-TGAGGA_327-A	6	97	6.48312e-05
207+AAAGTC_325-A	6	97.9	6.48312e-05
19+AGCAGAAGATCTCGGGCCGGAACA_38+GA_64+CGGTCT_125+CGGG_147+TCCT	6	47.6	6.48312e-05
191-GAGGAAGAAAGTGAG_323-G	6	94	6.48312e-05
107-A_203-GAGGAG	6	97.9	6.48312e-05
94-G_203-GAGGAG	6	97	6.48312e-05
14-G_203-GAG	6	97.3	6.48312e-05
208+AGAGAG	6	98.2	6.48312e-05
173-TCGATGTCGCAGCGAGGTGAGGAAGAAAG	6	88.9	6.48312e-05
20-CTG_40+CCCCGCGAAAATGCAT_80-AT_97-C_143-T_167+TGGCCCGTCCT_185+GCTTGCGCGGCT_227+CCGC_252+AACATCAGGTCGCTCATGTCGG_322+CGGCCCCCGGCTCATCA	6	42.5	6.48312e-05
205-GGAGGAG	6	97.9	6.48312e-05
207+AAAGTC_320-A	6	97.9	6.48312e-05
203-GAGGAG_319-GA	6	97.6	6.48312e-05
207+AAAATA	6	98.2	6.48312e-05
203-GAGGAG_228-AG	6	97.6	6.48312e-05
194-GAAGAAAGTGAGGA	6	95.8	6.48312e-05
207+AAAGGA	6	98.2	6.48312e-05
207+AAGAGA	6	97.9	6.48312e-05
208+AGATAG	6	98.2	6.48312e-05
203-GAGGAG_299-T	6	96.7	6.48312e-05
7-G_207+AAAGTC	5	97.9	5.4026e-05
206+GCTCTGT_323-G	5	96.5	5.4026e-05
9-T_207+AAAGTC	5	97.9	5.4026e-05
34+G_48+G_147+TAATAGATT	5	43.9	5.4026e-05
21-T_39-G	5	62.5	5.4026e-05
205+GGGTGAG_321-G	5	96.2	5.4026e-05
229+CTCAC_243+AA_303+CGCC	5	50.3	5.4026e-05
128-G_203-GAGGAG	5	97.9	5.4026e-05
206+GAAAAT	5	98.2	5.4026e-05
206+GGTGAAA	5	96.8	5.4026e-05
191-GAGGAAGAAAGTGAG_324-T	5	94	5.4026e-05
205+CCGCTT	5	97	5.4026e-05
10-A_203+GGA	5	97	5.4026e-05
208+AAGTCT	5	98.2	5.4026e-05
203-GAG_323-G	5	97.9	5.4026e-05
205+CCACTT_325-A	5	96.4	5.4026e-05
207+AAGGGC	5	98.2	5.4026e-05
202-TGAGGA_322-T	5	97.6	5.4026e-05
207+AAAGTC_326-G	5	97.9	5.4026e-05
203-GAGGAG_324-TA	5	97.6	5.4026e-05
77-G_203-GAGGAG	5	97.9	5.4026e-05
205+GGGAGAG	5	96.5	5.4026e-05
206-GAGGA	5	98.2	5.4026e-05
203-GAGGAGGAGGGTGGTAGTGCCACACA	5	91.6	5.4026e-05
207+AATATC	5	97.3	5.4026e-05
200-AGTGAGGAGGAG	5	96.4	5.4026e-05
203-GAG_327-A	5	97.9	5.4026e-05
204+AGGGTGA	5	97.3	5.4026e-05
204+ACCAAT	4	96.7	4.32208e-05
13-T	4	98.5	4.32208e-05
20-CTG_78+A_114-AC_153+TACGTAATAGATTTCGGTGTAT_174-CGA	4	44.3	4.32208e-05
52+T_203-GAGGAG	4	96.4	4.32208e-05
207+AAAGTC_319-GA	4	97.6	4.32208e-05
17+CC_33+AT_69-GGGG_112-ATAC_209+TCATAT_242+GCAAAAC_284-GAAGAAACGACGAC_318+T	4	42.9	4.32208e-05
7-G_203+GGA	4	96.7	4.32208e-05
205+CCACAG	4	97	4.32208e-05
69-GG_207+AAAGTC	4	97.6	4.32208e-05
205+CCACTT_324-T	4	96.4	4.32208e-05
207+TAAGTC	4	98.2	4.32208e-05
207+ATAATC	4	98.2	4.32208e-05
203-GAG_324-T	4	97.3	4.32208e-05
202-TGAGGA_329-G	4	96.7	4.32208e-05
14-G_203+GGA	4	96.7	4.32208e-05
30-G_54-GGA_68-TGGG_87-TACCACCGGGCA_119-AACTGTC_152-G_230+GT_295-GACGTTAAGCG	4	45.2	4.32208e-05
207+AAGAGC	4	98.2	4.32208e-05
76-A_203-GAGGAG	4	97.9	4.32208e-05
33+ACG_76+CTCTCCT_194+TGTTCATCACCTACCCTGTTGCCCGTCCACAC_211+AG_238-GGATG_320-AGT	4	42	4.32208e-05
203-GAG_329-G	4	97.6	4.32208e-05
18-CA_66+C_110+ATGCA_153+C_213+CCA_263-ACTAC_322+CGGCCCCCGGCTCATCA	4	44	4.32208e-05
207+ACTATC	4	97.3	4.32208e-05
202-TGAGGA_326-G	4	96.7	4.32208e-05
203-GAGGAG_322+T	4	97.9	4.32208e-05
204+GGGGTGA	4	96.2	4.32208e-05
207+AAAGTC_321-GT	4	97.6	4.32208e-05
211-GGG	4	97.9	4.32208e-05
180-CGCAGCGAGGTGAGGAAGAAAG	4	91.3	4.32208e-05
207+GAAGTC	4	98.2	4.32208e-05
205+GGGTGGG	4	96.8	4.32208e-05
203+ATA	4	97	4.32208e-05
205+CCACTG	4	97	4.32208e-05
206+GAAGAT	4	98.2	4.32208e-05
208+G	4	99.1	4.32208e-05
206-GA_323-G	4	97.9	4.32208e-05
208+AAAAAG	4	97.9	4.32208e-05
201-GTGAG	4	97.9	4.32208e-05
193-GGAAGAAAGTGAG	4	95.5	4.32208e-05
205-GG	4	99.4	4.32208e-05
14-G_203-GAGGAG_324-T	3	96.1	3.24156e-05
19+AAGCAAAGAAAAACAACCAA_45+CAAAGTTAGGGAAAAAAGTTCCAGCA_85+CAGTGACTGT_114+TA_138+GCAATTAAAT_169+TGCTCACCCATCGG_218-AGTGCCA_239+AGTC_270-TATTGTTCAC_295-GACGTTAAGCGTGCCGGAAG	3	40	3.24156e-05
201+GCGAG_323-G	3	96.1	3.24156e-05
20-CTG_81-TCTGTCT	3	42.1	3.24156e-05
206+GCTATGT	3	96.8	3.24156e-05
205+CAACTT	3	96.7	3.24156e-05
20-CTG_45+CATCA_104-TGT_134-GA_161+TTCGG_174+TTTGTTTTGC	3	46.4	3.24156e-05
139+C_181+TCGG	3	50.8	3.24156e-05
207+ATGTGAAGGTTGTTGTTGGATCATTTGCAGTGGAAGTTGACTCTGTACTGAGGTCTGTTGTGACCTCCA	3	81	3.24156e-05
191-GAGGAAGAAAGTGAG_325-A	3	94	3.24156e-05
10+A	3	98.5	3.24156e-05
20-CTG_33+AGGATCGCCCCGCGAAAATGCATGGGGAACAGGGCAAAAATGCCCGCCAT_51+ATTCAG_66+C_110+ATGCA_153+C_213+CAA_263-ACTAC_322+CGGCCCCCGGCTCATCA	3	41.7	3.24156e-05
34+G_48+A_104-TGT_134-GA_161+TTCGG_174+TTTGTTTTGC	3	47.1	3.24156e-05
157-G_203-GAG	3	97.3	3.24156e-05
25+G_44-GACTGTC_162+CCGG_190+CC_206+CGCCTTTCGGA_228+T_279+TT_311-GAAGAA	3	45.9	3.24156e-05
207+ATGTGAAGGTTGTTGTTGGATCATTTGCAGTGGAAGCTGACTCTGTACTGAGGTCTGTTGTGACCTCCA_322-T	3	80.8	3.24156e-05
203+GGA_323-G	3	96.7	3.24156e-05
205+GGGTGAG_323+G	3	96.2	3.24156e-05
37+CACAGCGTGTG_56+AGTACTGTC_96+CT_146+TAAGCGAC_151+CCACCACA_270+CCGC_311-GAAGA	3	43.9	3.24156e-05
207-AGGAGGGT	3	97.6	3.24156e-05
203+GGA_326-G	3	96.7	3.24156e-05
191-GAGGAA_329-G	3	94.9	3.24156e-05
203-GAG_319-GA	3	97.3	3.24156e-05
46-CTGT_65-ATCTGGGG_123-GTC_183+CTGCTAA	3	46.4	3.24156e-05
203-GAGGAG_288-A	3	97.9	3.24156e-05
152-G_207+AAAGTC	3	97.9	3.24156e-05
7+G_203-GAGGAG	3	96.7	3.24156e-05
107-A_207+AAAGTC	3	97.9	3.24156e-05
203-GAGGAG_319-G	3	96.4	3.24156e-05
203-GAGGAG_249-C	3	96.1	3.24156e-05
89-C	3	98.5	3.24156e-05
188-GGTGAGGAAGAAAGT	3	94	3.24156e-05
329-G	3	98.5	3.24156e-05
152-G_203-GAGGAG	3	96.4	3.24156e-05
203+GGA_327-A	3	96.7	3.24156e-05
205+CCACAT	3	96.7	3.24156e-05
207+AAAGCC	3	98.2	3.24156e-05
205+GGGTGAG_323-G	3	96.2	3.24156e-05
191-GAGGAA_324-T	3	94.6	3.24156e-05
13-T_207+AAAGTC	3	97.9	3.24156e-05
34+G_48+G_120+GTGTTGG	3	45.2	3.24156e-05
18-CACTG_33-CTG_76+CTA_98-AAGAAGTGTAACGGATACGTTAACTG_186-GAGGTGAGGAAGAAAGT_240-ATGTGGAT_321+CCG	3	43.5	3.24156e-05
30-GT_37-GCG_74-GGA	3	52.1	3.24156e-05
205+GGGTGAG_327-A	3	96.2	3.24156e-05
181-GCAGCGAGGTGAGGAAGAAAGT_323-G	3	91	3.24156e-05
205+CCACTT_321-G	3	96.4	3.24156e-05
203-GAG_326-G	3	97.6	3.24156e-05
191-GAGGAAGAAAGTGAG_329-G	3	94	3.24156e-05
21+CG_162+GCCCTCCTG_236-TCG_255+T	3	41.9	3.24156e-05
9+T_203-GAGGAG	3	96.4	3.24156e-05
321-G	3	98.2	3.24156e-05
203-GAGGAG_318-C	3	93.1	3.24156e-05
208+CTATAG	3	97.6	3.24156e-05
207+GTGAGGA	3	96.5	3.24156e-05
248-ACA	3	93.1	3.24156e-05
203-GAG_325-A	3	97	3.24156e-05
207+AAAGTC_244-G	3	88.5	3.24156e-05
203-GAGGAG_329+G	3	97.9	3.24156e-05
203+GGG	3	97.9	3.24156e-05
73-T_208+AGAAAG	3	97.9	3.24156e-05
204+ACAACT	3	97.6	3.24156e-05
206+GATCAGATGATACGT	3	94.5	3.24156e-05
34+G_48+G_125+GGCA_134+CCTTTGTAC_171-GAT	3	46.5	3.24156e-05
203+GACCAA	3	96.7	3.24156e-05
208+GGAGGGT	3	97.3	3.24156e-05
52-G_191-GAGGAA	3	95.2	3.24156e-05
203-GA	3	98.2	3.24156e-05
15-C_203-GAGGAG	3	96.7	3.24156e-05
20+TAAAATC_60+ACCAGAACACACCAAAA_72+CCCATTCA_91-A	3	44.2	3.24156e-05
203-GAGGAG_282-C	3	95.8	3.24156e-05
195-AAGAAA	3	97.3	3.24156e-05
157-G_203-GAGGAG	3	97.9	3.24156e-05
207+GTGAGAA	3	96.8	3.24156e-05
207+AATATA	3	97.9	3.24156e-05
208+AGGAAG	3	98.2	3.24156e-05
20-CTG_33+AGGATCGCCCCGCGAAAATGCATGGGGAACAGGGCAAAAATGCCCGCCAT_51+ATTCAG_66+C_110+ATGCA_153+C_213+CCA_263-ACTAC_322+CGGCCCCAGGCTCATCA	3	41.9	3.24156e-05
190-TGAGGA	3	97	3.24156e-05
206+GGTGAGT	3	96.8	3.24156e-05
209-GAGGGT	3	96.7	3.24156e-05
208+ATAAAG	3	98.2	3.24156e-05
9-T_203-GAG	2	97.6	2.16104e-05
206+CACTTT	2	97	2.16104e-05
20-CTG_33+AGGATCGCCCCGCAAAAATGCATGGGGAACAGGGCAAAAATGCCCGCCAT_51+ATTCAG_66+C_110+ATGCA_153+C_213+CCA_263-ACTAC_322+CGGCCCCCGGCTCATCA	2	41.9	2.16104e-05
254-GAAGCTGAGACTACCGTATT_311-GA	2	43.2	2.16104e-05
203+GGA_271-A	2	97	2.16104e-05
203-GAGGAG_327+A	2	97.9	2.16104e-05
10-A_194-GAAGAAAGTGAGGAGGA	2	93.4	2.16104e-05
182-CA_203-GAGGAG	2	97.6	2.16104e-05
50-CC_203-GAGGAG	2	96.1	2.16104e-05
21+CAGGACGAAAGGATCGCCCCGCGAAAATGCATGGGGAACAGGGCAAAAA_38+GCCA_66+C_110+ATGCA_153+C_213+CCA_263-ACTAC_322+CGGCCCCCGGCTCATCA	2	41.3	2.16104e-05
186-GAGGTGAGGAAGAAAGTGAGGAGGA_324-T	2	91	2.16104e-05
74-G_197-GAAAGTGAGGAG	2	95.2	2.16104e-05
228-AGAGAG_250-AACG_271-ATTGTTCAC_310-GGAAGA	2	49	2.16104e-05
220-TGCC_257-GC_270-TATTGTT_305-GTGCCGGAA	2	51	2.16104e-05
133-T_203-GAG	2	97.6	2.16104e-05
44-G_60-G_112-ATACGTTAA_198-AAA	2	45.9	2.16104e-05
152-G_208+AGAAAG	2	97.9	2.16104e-05
34+G_48+G_104-TGT_130+CACTTGTTGCTCCTT_152+A	2	45	2.16104e-05
119-A	2	98.5	2.16104e-05
194-GAAGAAAGTGA	2	95.5	2.16104e-05
205+CCAAGT	2	96.7	2.16104e-05
207+ATGTGAAGGTTGTTGTTGGATCATCTGCAGTGGAAGCTGACTCTGTACTGAGGTCTGTTGTGACCTCCA	2	81	2.16104e-05
205+GGGTGAG_324-T	2	95.9	2.16104e-05
203-GAGGAG_321-GTG	2	95.8	2.16104e-05
59-CGAT_123+CGCCATTCTCATCCTGGGCAATA_145-G_187+C_201+TAACCCTGGCCCGATTTCCT_255+GA_284+TCCA_310-GGA	2	42.9	2.16104e-05
22+CAAGA_85-TCTACCACCGGGCAAGAAGT_117-TTAACTGTCT	2	43.8	2.16104e-05
31-TACTGC_67-CTGGGGTGG_94+AG	2	52.8	2.16104e-05
9-TA_203-GAG_321-G	2	97	2.16104e-05
207+ATAGGC	2	98.2	2.16104e-05
212+GA	2	96.7	2.16104e-05
20-CTG_85-TCTACCA	2	55.7	2.16104e-05
30-GTACTGCG_52-GGG_83+CA_115+AAG_170-CGATC_188+T_216+T	2	48.4	2.16104e-05
66-TCTGGGGTGGAGGG_128+TAAA_175-GATGTCGCAGCGAGG_205-GGAGGAGG	2	41.5	2.16104e-05
203-GAGGAG_325+A	2	97.9	2.16104e-05
125-C_203-GAGGAG	2	96.7	2.16104e-05
198-AAAGTGAGGA_271-A	2	96.4	2.16104e-05
25-AGCACGTACTGCGCGG_78-GGATCT_176-A	2	44.9	2.16104e-05
20-CTG_40+CCCCGCGAAAATGCAT_80-AT_97-C_143-T_167+TGGCCCGTCCT_185+GCTTGCGCGGCT_230+CCA_252+AACATCAGGTCGCTCATGTCGG_322+CGGCCCCCGGCTCATCA	2	42.4	2.16104e-05
14-G_205+GGGTGAG	2	96.2	2.16104e-05
20+CAGTGT_62+G	2	58.2	2.16104e-05
191-GAGGAA_323-G	2	94.9	2.16104e-05
208+GGAAAG	2	98.2	2.16104e-05
124-TCTTGGT_186-G_220-TGCCA_259-TGAG_313+TTTCGGTGTATGCGTGGATTTTG	2	42.7	2.16104e-05
77-GG_136-GG	2	48.1	2.16104e-05
19-ACTGCCAGCA	2	46.9	2.16104e-05
10-A_208+AGAAAG	2	97.9	2.16104e-05
94-G_207+AAAGTC	2	97.9	2.16104e-05
206-GA_319-GA	2	97.3	2.16104e-05
135-A_207+AAAGTC	2	97.6	2.16104e-05
52-G_203-GAG	2	97.3	2.16104e-05
203-GAGGAG_267-C	2	96.7	2.16104e-05
313+CATCTCCGAGCCCACG	2	56.1	2.16104e-05
203-GAGGAG_308-C_322-T	2	96.4	2.16104e-05
69-G_206-GA	2	97.6	2.16104e-05
92-C_191-GAGGAAGAAAGTGAG	2	94	2.16104e-05
20-C_39-GGG_69+CCATGGTG_121-CTGTCTTGGTGG_202+T_222-CCACACAGAGAGCTTCGGATGTGGATACAA_308-CCGGAAGA	2	41.9	2.16104e-05
10-A_197-GAAAGTGAGGAG	2	95.2	2.16104e-05
20-CTG_33+AGGATCGCCCCGTGAAAATGCATGGGGAACAGGGCAAAAATGCCCGCCAT_51+ATTCAG_66+C_110+ATGCA_153+C_213+CCA_263-ACTAC_322+CGGCCCCCGGCTCATCA	2	41.7	2.16104e-05
208-GGAGG	2	97	2.16104e-05
43+AT_125+GGCACTTGTTGCTC_155-A	2	44	2.16104e-05
204+AAGAGA	2	97.9	2.16104e-05
321-GT	2	97.9	2.16104e-05
48-GTCC_65-ATCTGGGG_123-GTC	2	45.9	2.16104e-05
206+GGC	2	96.1	2.16104e-05
23-C_202-TGAGGA	2	95.2	2.16104e-05
205-GGAGGAGGGT	2	95.8	2.16104e-05
86-CTACCACCGGGCAAGAAGTGTAACGGATACGTTAACTGTCTTGGTGGTGAGGATGAGTCGGGCTGTGGGATGGATCAGATGCTACGATCGATGTCGCAGCGAGGTGAGGAAGAAAGTGAGGA	2	62.7	2.16104e-05
145-G_203-GAGGAG	2	96.4	2.16104e-05
207+ACGATA	2	97.6	2.16104e-05
206+GCTCTGA	2	97.1	2.16104e-05
207+AATTTC	2	97	2.16104e-05
203-GAGGAG_323-GTAGA	2	95.2	2.16104e-05
207+AAAAAC	2	97.3	2.16104e-05
189-GTGAGGAAGAAAGTGAGGA	2	94	2.16104e-05
207+AGAGAC	2	98.2	2.16104e-05
206+TAAAGT	2	96.4	2.16104e-05
52+G_203-GAGGAG	2	96.1	2.16104e-05
206+GGTCTGT	2	97.1	2.16104e-05
194-GAAGAA	2	95.2	2.16104e-05
204+AAAGCT	2	97.3	2.16104e-05
56-A_203-GAGGAG	2	95.8	2.16104e-05
20+GCAGCT_45+CAAAGTTCTAT_102+G	2	47.8	2.16104e-05
88-ACC_203-GAGGAG	2	95.8	2.16104e-05
208+AAG	2	99.1	2.16104e-05
202+AGAGGA	2	97.6	2.16104e-05
13-T_202-TGAGGA	2	96.7	2.16104e-05
204+ACCGCT	2	97	2.16104e-05
204+AACACT	2	96.7	2.16104e-05
317-GC	2	97.3	2.16104e-05
203+GAGCAC	2	97.3	2.16104e-05
201+GAG	2	96.4	2.16104e-05
203-GAGGAG_246-A_325-A	2	95.8	2.16104e-05
203-GAGGAG_244-G	2	96.7	2.16104e-05
206+CACGAT	2	97.9	2.16104e-05
46-CTGT_65-ATCTGGGG_123-GTC_177+CTGCGAC	2	46.9	2.16104e-05
203-GAG_240-AT	2	97.3	2.16104e-05
197-GAAAGTGAGGAGGAG	2	92.2	2.16104e-05
205+ACACAT	2	96.7	2.16104e-05
318-C	2	91.3	2.16104e-05
202-TGAGGA_324-TA	2	96.4	2.16104e-05
208+AAGAAG	2	97.6	2.16104e-05
207+AAAGTT	2	98.2	2.16104e-05
200-AGTG	2	98.5	2.16104e-05
208+CTATCG	2	96.7	2.16104e-05
20-CTG_40+CCCCGCGAAAATGCAT_70+C_91+GTGTAG_115+GTCGC_135+TTTCATGC_172-A_227+CCGC_252+AACATCAGGTCGCTCATGTCGG_322+CGGCCCCCGGCTCATCA	2	42.6	2.16104e-05
207+ACTATA	2	97	2.16104e-05
203-GAGGAG_325-AGAA	2	95.8	2.16104e-05
82-CTGTCTACCACCGGGCAAGAAGTGTAACGGATACGTTAACTGTCTTGGTGGTGAGGATGAGTCGGGCTGTGGGATGGATCAGATGCTACGATCGATGTCGCAGCGAGGTGAGGAAGAAAGTGAGGAGGA_323-G	2	59.9	2.16104e-05
74-G_203-GAGGAG	2	97.9	2.16104e-05
208+AGTTCG	2	97	2.16104e-05
203-GAGGAG_223-CA	2	96.4	2.16104e-05
208+AGAAAG_320-A	2	97.9	2.16104e-05
206+GCTCTGT_326+G	2	96.5	2.16104e-05
207+GTGGAAA	2	96.5	2.16104e-05
20-CTGCCAG	2	57.4	2.16104e-05
207+ACAGTC	2	97.9	2.16104e-05
208+ATATCG	2	97.6	2.16104e-05
208+TCTGTGT	2	97.3	2.16104e-05
43+AT_104-TGT_134-GA_161+TTCGG_174+TTTGTTTTGC	2	46.1	2.16104e-05
195-AAGAAAGTGAGGA	2	94	2.16104e-05
208+AGAAAG_329-G	2	97.9	2.16104e-05
208+CTTTCG	2	96.7	2.16104e-05
207+GTGAAAA	2	96.5	2.16104e-05
205+CCACTC	2	96.7	2.16104e-05
207+AAAAAA	2	96.2	2.16104e-05
63-GTATCTGGGGTGGAGGGATCTGTCTACCACCGGGCAAGAAGTGTAACGGATACGTTAACTGTCTTGGTGGTGAGGATGAGTCGGGCTGTGGGATGGATCAGATGCTACGATCGATGTCGCAGCGAGGTGAGGAAGAAAGTGAGGA	2	54.8	2.16104e-05
208+AAATAG	2	97.6	2.16104e-05
208+CGATAG	2	97.6	2.16104e-05
206+GCGCTGT	2	97.1	2.16104e-05
206+GGAGAAA	2	97.3	2.16104e-05
77-G_202-TGAGGA	2	96.7	2.16104e-05
205+AGGTGGG	2	96.2	2.16104e-05
21+CAGGACGAAAGGATCGCCCCGCGAAAATGCATGGGGAACAGGGCAAAAA_33+GCG_66+C_110+ATGCA_153+C_213+CCA_263-ACTAC_322+CGGCCCCCGGCTCATCA	2	41.6	2.16104e-05
205+GGGTGAT	2	96.2	2.16104e-05
206+GGTGATA	2	97.1	2.16104e-05
203-GAGGAG_275-T	2	90.1	2.16104e-05
20-CTG_33+AGGATCGCCCCGCGAAAATGCATGGGGAACAGGGCAAAAATGCCCGCCAT_51+ATTCAG_66+C_110+ATGCA_153+C_213+CCA_263-AC_296+C_320+GCCCCCGGCTCAT	2	42.7	2.16104e-05
205+CCAGTT	2	96.2	2.16104e-05
208+AGAGGG	2	97.9	2.16104e-05
52-G_207+AAAGTC	2	97.9	2.16104e-05
13-TGCGC_129+GCCAATTAGGTGCGAGAGCACGC_210+TT	2	42.1	2.16104e-05
205-G	2	99.1	2.16104e-05
203+GAAAAC	2	97.6	2.16104e-05
52-G	2	98.8	2.16104e-05
206+CAATAT	2	97	2.16104e-05
206+GGTGGGA	2	96.5	2.16104e-05
203-GAGGAG_248-A	2	97.9	2.16104e-05
206+CACTAT	2	97	2.16104e-05
205+AAACTT	2	96.7	2.16104e-05
192-AGGAAGAAAGTGAGGA	2	93.4	2.16104e-05
206+CAATTT	2	97.3	2.16104e-05
205+ACGCTT	2	96.4	2.16104e-05
206+CACGTT	2	97	2.16104e-05
207+AAAAGA	2	95.3	2.16104e-05
205-GGAGG	2	94.3	2.16104e-05
207+ACGTTA	2	97.3	2.16104e-05
10-A_21-TGCCAGCACGTA_73-TGGAGGGATCTGT	1	47.3	1.08052e-05
87-TACCACCGGGCAAGAAGTGTAACGGATACGTTAACTGTCTTGGTGGTGAGGATGAGTCGGGCTGTGGGATGGATCAGATGCTACGATCGATGTCGCAGCGAGGTGAGGAAGAAAGTGAGGAG	1	62.3	1.08052e-05
16-GCCACT_95+TTATTGATC_112+CAGCAAATGaaaaaaaa	1	42.2	1.08052e-05
88-ACCACCGGGCAAGAAGTGTAACGGATACGTTAACTGTCTTGGTGGTGAGGATGAGTCGGGCTGTGGGATGGATCAGATGCTACGATCGATGTCGCAGCGAGGTGAGGAAGAAAGTGAGGA	1	63.9	1.08052e-05
267-C	1	98.2	1.08052e-05
205+CCACTT_326-G	1	96.4	1.08052e-05
14-GC_208+AGAAAG	1	97.6	1.08052e-05
203-GAGGAG_237-C	1	96.4	1.08052e-05
144-CGGGCTGTGGGATGGATCAGATGCTACGATCGATGTCGCAGCGAGGTGAGGAAGAAAGTGAGGA	1	80.4	1.08052e-05
205+AGTG	1	97	1.08052e-05
29+TAGC_81-TCTGTCT_125-CTTGGTGGTGAGGATGA_153-GGAT_224-ACACA_245+ATA_270+GCGGAACGGCAAAC_311-GAAGAA	1	43.1	1.08052e-05
203+GAA	1	97.3	1.08052e-05
22+CAAGATTCA_65+CG	1	46.9	1.08052e-05
133-T_201-GTGAGG	1	90.7	1.08052e-05
203+GAGGTTACCCCAGTTGGGGGGCGCGCCCAACTTTGTATAGAAAAGTTGGGTGAGG	1	78.6	1.08052e-05
207-A_324-T	1	97.3	1.08052e-05
151+AA	1	48.1	1.08052e-05
207+ACGATC	1	97.3	1.08052e-05
21+CA_40+CGAAAATGCAT_81-TCT_97-C_143-T_167+TGGCCCGTCCT_185+GCTTGCGCGGCT_227+CCGC_252+AACATCAGGTCGCTCATGTCGG_322+CGGCCCCCGGCTCATCA	1	42.8	1.08052e-05
206+GGACAGT	1	97.1	1.08052e-05
208+CATTCT_325-A	1	89.6	1.08052e-05
189-GTGAGGAAGAAAGTGA	1	93.7	1.08052e-05
207+AAAGTC_256-AGCTGAGACTAC	1	87.3	1.08052e-05
207+AAAGTC_244-G_281-T_301+AG	1	87.9	1.08052e-05
207+AATGTC	1	98.2	1.08052e-05
207+AGATGAGTGGTTCCCCGAGTTGGAGGGGGTGCTACACTTGGTATAGAAGAGAGGGGAGAATGAGA	1	82.4	1.08052e-05
68-T_203-GAGGAG	1	97.6	1.08052e-05
204+ACAAAT	1	85.8	1.08052e-05
20-CTG_45+CGAAAATGCATGGGGAACAGGGCAAA_53+CCATCA_66+GTCATTCAGCGTGTAGACCTGGAAC_110+ATGCA_153+C_213+CCA_263-AC_296+C_321+CCCCCGGCTCATC	1	42.7	1.08052e-05
206+GATAAT	1	98.2	1.08052e-05
208+AGAGAC	1	91.1	1.08052e-05
13-T_206-GA	1	97.9	1.08052e-05
157-GG_203-GAGGAG	1	96.1	1.08052e-05
205+CCACTT_327-A	1	96.4	1.08052e-05
206+AAAAAT	1	93.5	1.08052e-05
203-GAGGAG_292-G	1	87.7	1.08052e-05
207+ATGTGAAGGTTGTTGTTGGATCATTTGCAGTGGAGGCTGACTCTGTACTGAGGTCTGTTGTGACCTCCA	1	80.5	1.08052e-05
207+GAAAGTC	1	97.1	1.08052e-05
196-AGAAAGTGAGG_322-T	1	88.6	1.08052e-05
29-CGTACTG_68+TAT_128-GGTGG_142-GTCGG_179+AA_197-G_236-TCGG_266-ACCGTATTGTTC_310-G	1	44.5	1.08052e-05
207+GAAGAC	1	97	1.08052e-05
21+ATCTCCG_53-GGGATGC_203-GAGGAG	1	84.4	1.08052e-05
203-GAGGAG_255+A	1	89.8	1.08052e-05
202-TGAGGA_254+GAA_321-GTG	1	89.6	1.08052e-05
133-T_200+TGG	1	85.1	1.08052e-05
20-CTG_33+AGAATCGCCCCGCGAAAATTCATGGGGAACAGGGCAAAAATGCCCGCCAT_51+ATTCAG_66+C_106+TT_114+CAC_153+C_202+CCA_260-GAGAC_309+CAAG_320+GCCCCAGGATCAT	1	43.4	1.08052e-05
208+AAATCg_275-T_301+A	1	86.4	1.08052e-05
20-CTG_33+AGGATCGCCCCGCGAAAATGCATGGGGAACAGGGCAAAAATGCCCGCCAT_51+ATTCAG_66+C_110+ATGCA_153+C_213+CCA_263-ACTAC_322+CGGCCCCGGGCTCATCA	1	41.7	1.08052e-05
202-TGAGGA_260-G	1	91.9	1.08052e-05
186-GAGGTGAGGAAGAAAGT	1	93.1	1.08052e-05
20-CTG_78+A_114-AC_153+TACGTAATA_176+TGTTTTGCTC	1	44.9	1.08052e-05
207+AGGAGA	1	96.2	1.08052e-05
204+AAAAAT	1	96.7	1.08052e-05
74-G_205+GGGTGAG	1	96.2	1.08052e-05
204+AACACA	1	95.9	1.08052e-05
205+GGGTGAG_325-A	1	95.3	1.08052e-05
69-G_191-GAGGAAGAAAGTGAG	1	92.8	1.08052e-05
203+TGA	1	97.3	1.08052e-05
152-GG_203-GAGGAG	1	96.1	1.08052e-05
202-TGAGGA_264-CTACCGTATTGT	1	90.1	1.08052e-05
203-GAGGAG_267-C_329+G	1	89.5	1.08052e-05
203-GAG_309-CG	1	90.1	1.08052e-05
69-G_190-TGAGGAA_203+A	1	91.9	1.08052e-05
197-GAAAGTGAGGAG_324-T	1	94.3	1.08052e-05
186-GAGGTGAGGAAG	1	95.5	1.08052e-05
205+AAAGAT	1	96.4	1.08052e-05
203-GAGGAG_285-A	1	95.8	1.08052e-05
202-TGAGGA_252-C	1	88.9	1.08052e-05
106-T_203-GAGGAG	1	96.4	1.08052e-05
11+G_32-ACTGCG_55-GA_110-G_140-G_177+ACGGTGTGTTATAGACGTAG_217+CA_237+TACG_255+CGCAGCTCATCGCA_312-AAGA	1	46.1	1.08052e-05
45-A	1	50	1.08052e-05
207+ATGTGAAGGTTGTTGTTGGACCATTTGCAGTGGAAGCTGACTCTGTACGGAGGTCTGTTGTGACCTCCA	1	81	1.08052e-05
20-CTG_33+AGGATCGCCCCGCGAAAATGCATGGGGAATAGGGCAAAAATGCCCGCCAT_51+ATTCAG_66+C_110+ATGCA_153+C_213+CCA_263-ACTAC_322+CGGCCACCGGCTCATCA	1	41.4	1.08052e-05
202-TGAGGA_292-G	1	86.1	1.08052e-05
207+A_324-T	1	94.6	1.08052e-05
202-TGAGGA_264-C_299+T_321-G	1	92.5	1.08052e-05
59-C_203-GAGGAG	1	94.6	1.08052e-05
208+ATGTAG	1	91.7	1.08052e-05
203-GAG_271-A	1	97.6	1.08052e-05
222-CCA	1	75.3	1.08052e-05
19+AGCAGAAGATCTCGGGCCGGAACA_38+GA_64+CGGTCT_125+CGGG_149+CTCA	1	46.7	1.08052e-05
203+GACGAC	1	97.3	1.08052e-05
203-GAG_223-CA	1	97	1.08052e-05
206+A	1	87.7	1.08052e-05
20-CTG_33+AGTATCGCCCCGCGAAAATGCATGGGAAACAGTGCAAAAATGCCCGCCAT_51+ATTCAG_66+C_110+ATGCA_153+C_210+CTGCCA_236-TCG_263-AC_296+C_320+GCCCCCGGCTCAT	1	42.9	1.08052e-05
204+ACCACT_323-G	1	94.4	1.08052e-05
207+TAGAGGATGCTC	1	94.5	1.08052e-05
10-A_205+CCACTT_325-A	1	96.2	1.08052e-05
191-GAGGAAGAAAGTGAGGA	1	93.7	1.08052e-05
204+AAAATT	1	97	1.08052e-05
234-CTTCGGAT_298+A_311-GA	1	48.4	1.08052e-05
206+GAGCAGATGCAACGT	1	93.9	1.08052e-05
89-C_207+AAAGTC	1	97.6	1.08052e-05
209+AGGAA	1	96.4	1.08052e-05
34+G_48+G_174+TTTGTTTTGC	1	44.4	1.08052e-05
76-A_203-GAG	1	96.7	1.08052e-05
207+AAGTTA	1	96.7	1.08052e-05
148-CTGTGGGATGGATCAGATGCTACGATCGATGTCGCAGCGAGGTGAGGAAGAAAGTGAGGA	1	81.9	1.08052e-05
191-GAG_208+AAGTAG	1	97	1.08052e-05
208+AGTGAT	1	92	1.08052e-05
203+GGA_325+A	1	96.7	1.08052e-05
20-CTG_40+CCCCGCGAAAATGCAT_80-AT_97-C_143-T_167+TGGCTCGTCCT_185+GCTTGCGCGGCT_227+CCGC_252+AACATCAGGTCGCTCATGTCGG_322+CGGCCCCCGGCTCATCA	1	42.3	1.08052e-05
205+GAAGGAG	1	95.9	1.08052e-05
39-G_191-GAGGAAGAAAGTGAG	1	94	1.08052e-05
23-CCAGCACGTA	1	54.2	1.08052e-05
208+GCGGTGT	1	97.1	1.08052e-05
10-A_202-TGAGGAGGA	1	95.8	1.08052e-05
78-GGATCTGTCTACCACCGGGCAAGAAGTGTAACGGATACGTTAACTGTCTTGGTGGTGAGGATGAGTCGGGCTGTGGGATGGATCAGATGCTACGATCGATGTCGCAGCGAGGTGAGGAAGAAAGTGAGGA	1	59.3	1.08052e-05
207+AAAGTC_295-G_319+A	1	88.2	1.08052e-05
17-CCACTGC_55+TA	1	60.3	1.08052e-05
17-C_203-GAGGAG	1	95.8	1.08052e-05
20-CTG_40+CCCCGCGAAAATGCAT_80-AT_97-C_143-T_187+CAGGCGGCGGCTTGCGCGGGTCT_227+CCGC_252+AACATCAGGTCGCTCATGTCGG_322+CGGCCCCCGGATCAGCA	1	41.8	1.08052e-05
34+G_48+G_89+G_110+ATTTCACTAGTGT_155-A_174-CGA	1	47.8	1.08052e-05
203-GAG_244-GGA	1	88.6	1.08052e-05
151-TGGGATGGATCAGATGCTACGATCGATGTCGCAGCGAGGTGAGGAAGAAAGTGAGGA	1	81.9	1.08052e-05
271-A	1	98.8	1.08052e-05
206+GAGAGA	1	97.6	1.08052e-05
205+GGGAAAC	1	94.7	1.08052e-05
52-G_191-GAGGAAGAAAGTGAGGAG_322-T	1	93.7	1.08052e-05
208+AAGGCG	1	97.3	1.08052e-05
206+CAAGAT	1	97	1.08052e-05
73-T_203-GAG	1	96.4	1.08052e-05
88-ACCACCGGGCAAGAAGTGTAACGGATACGTTAACTGTCTTGGTGGTGAGGATGAGTCGGGCTGTGGGATGGATCAGATGCTACGATCGATGTCGCAGCGAGGTGAGGAAGAAAGTGAGGAG	1	62.3	1.08052e-05
69-G_88+G_207+AAAGTC	1	91.4	1.08052e-05
20+GGCG_26+ATG_43+CA_79+CAAA_98-AAG_175+CG_218-AGTGCCACACAGAGAGC_312+CGAAAATTGTCACCTACGAATGGGGCGAATAC	1	44.9	1.08052e-05
191+C_199-AAGTGAG	1	95.8	1.08052e-05
20-CTG_33+AGGATCGCCCCGCGAAAATGCATGGGGAACAGGGCAAAAATGCCCGCCAT_51+ATTCAG_66+C_110+ATGCA_153+C_213+CCA_263-ACTAC_322+CTGCCCCCGGCTCATCA	1	41.4	1.08052e-05
204+TGT	1	96.4	1.08052e-05
240-ATGT_248-ACAACG_273+AAAGGTTGTCTTA_287+CAGGAAGAAGGC	1	43.2	1.08052e-05
203+GGTGGA_211+G_299-T	1	89.4	1.08052e-05
205+TCACTT	1	95.9	1.08052e-05
208-G	1	97.6	1.08052e-05
161-CAGATGCTACGATCGATGTCGCAGCGAGGTGAGGAAGAAAGTGAG	1	84.6	1.08052e-05
20-CTG_33+AGAATCGCCCCGCGAAAATTCATGGGGAACAGGGCAAAAATGCCCGCCAT_51+ATTCAG_66+C_110+ATGCA_153+C_213+CAA_248-ACAAC_322+CGGCCCCAGGATCAGCA	1	42.4	1.08052e-05
207+AGAGGC	1	97.3	1.08052e-05
131-G	1	98.5	1.08052e-05
13-T_203-GAG	1	97.3	1.08052e-05
203+GGA_249-C_329+G	1	89.3	1.08052e-05
20+CCAGGACGAAAGGATCGCCGCGCGAAAATGCATGGGGAACAGGGCAAAAATGC_66+C_110+ATGCA_153+C_213+CCA_264-CTACC_322+CGGCCCCCGGCTCATCA	1	41.3	1.08052e-05
208+TCGGGGT	1	97.3	1.08052e-05
14-GC_31-TA_39-GGGCTGA_63+CCGG_203+TCATCGA_232+A_301-AAGCG_311-GAAGAAGC	1	46.8	1.08052e-05
88-ACCACCGGGCAAGAAGTGTAACGGATACGTTAACTGTCTTGGTGGTGAGGATGAGTCGGGCTGTGGGATGGATCAGATGCTACGATCGATGTCGCAGCGAGGTGAGGAAGAAAGTGAGG	1	63.6	1.08052e-05
206+GGACAGATGCTACGT	1	93.9	1.08052e-05
15-C_203-GAG	1	97	1.08052e-05
20-CTG_33+AGAATCGCCCCGCGAAAATGCATGGGGAACAGGGCAAAAATGCCCGCCAT_51+ATTCAG_66+C_110+ATGCA_153+C_213+CCA_263-ACTAC_322+CGGCACCCGGCTCATCA	1	41.7	1.08052e-05
208+GTTGGGT	1	96.8	1.08052e-05
94-G	1	98.2	1.08052e-05
20-CTG_33+AGGATCGCCCCGCGAAAATGCATGGGGAACAGGGCAAAAATGCCCGCCAT_51+ATTCAG_66+C_110+ATGCA_153+C_213+CCA_263-ACTAC_322+CGGCCCCAGGCTCAGCA	1	41.7	1.08052e-05
203-GAGGAG_259-T	1	84.3	1.08052e-05
17-CC_203-GAGGAG	1	97.3	1.08052e-05
207+AGTAGC	1	97.9	1.08052e-05
20+C_57+ACAGGGCAAAAG_80-AT_97-C_110+ACGGT_144+GTTTCATGCATCACCCG_227+CCGC_252+AACATCAGGTCGCTCATGTCGG_322+AGGCCCCAGGCACATCA	1	42.4	1.08052e-05
205+GGAGGAG	1	93.8	1.08052e-05
203+GGGGAG	1	97.6	1.08052e-05
36+A_61-ATGTATCTGGGGT_111-GA_157+ACTCGACAGCGA_171-GATCGA	1	47	1.08052e-05
73-T_203-GAGGAG_320-A	1	88.6	1.08052e-05
201-GTG_240-AT	1	95.5	1.08052e-05
33-CTGCGCGGGCTG	1	46.8	1.08052e-05
203+GGA_329-G	1	96.7	1.08052e-05
207+ATGTGAAGGTTGTTGTTGGATCATTTGCAGTGGAAGCTGGCTCTATACTGAGGTCTGTTGTGGCCTCCA	1	81	1.08052e-05
206+ACAAGT	1	97	1.08052e-05
207+ACAAAA	1	97	1.08052e-05
34+G_48+G_125+GGCA_134+C_174+TTTGC	1	46.7	1.08052e-05
190-TGAGGAA_206+T	1	95.5	1.08052e-05
160-TCAGATGCTACGATCGATGTCGCAGCGAGGTGAGGAAGAAAG	1	63.6	1.08052e-05
206+GGAGAGA	1	94.1	1.08052e-05
159-A_191-GAGGAA	1	94.9	1.08052e-05
207+GTGA	1	97	1.08052e-05
205+AAGCAT	1	97	1.08052e-05
20-CTG_40+CCCCGCGAAAATTCAT_75+CCAGGGAGTCATTCAGCGTGTAGACCTGGAACACGGTGAAT_110+ATGCA_153+C_213+CCA_263-ACTAC_309+CAAA_320+GCCCCAGGATCAT	1	42.7	1.08052e-05
218-AGTGCC	1	94.6	1.08052e-05
14-G_202-TGAGGA	1	96.7	1.08052e-05
202-TGA_323-G	1	87.3	1.08052e-05
207+ACTTTA	1	97.3	1.08052e-05
207+TCTTTC	1	97	1.08052e-05
219-GTGC_228+A_263-A_282+C_325-A	1	90.7	1.08052e-05
203-GAGGAG_221+G_278-A	1	88.9	1.08052e-05
204+ACACAT	1	94.7	1.08052e-05
207+ATGTTAAGGTTGTTGTTGGATCATGTGCAGTGGAAGCTGACTCTGTACTGAGGTCTGTTGTGACCTCCA	1	81	1.08052e-05
203-GAGGAG_258-C	1	90.4	1.08052e-05
24-CAGCACGTACTGCGCGG_85+CTTGaaaaaaaaaaaaa_206+TCATGT	1	60.8	1.08052e-05
207+ATGGTC	1	97	1.08052e-05
208+TGAAAG	1	97.9	1.08052e-05
201+TTG	1	96.7	1.08052e-05
45-ACTGTCCGGGGATGCGATGTAT_193-GG_208-GGAGGGTGGTAGTGCCAC_249+AT_305+A_315+TC	1	42.7	1.08052e-05
20+CCAGGACGAAAGGATCGCCCCGCGAAATGCATGGGGAACAGGGCAAAAATGC_66+C_110+ATGCA_155+GCTATACGTCTGGGAGCAAATA_211-GGGTGG_229-GAGAG_244+C_294+GCC_306+C	1	42.7	1.08052e-05
144-C_175-GATGTCG_239-GAT	1	45.8	1.08052e-05
203-GAGGAG_312+A	1	89.5	1.08052e-05
241+T	1	88.6	1.08052e-05
203-GAGGAG_242+AGAGATGCAGAG	1	88.1	1.08052e-05
207+GTGAGGC	1	95	1.08052e-05
41+ATT_48+TG	1	61	1.08052e-05
10-A_186-GAGGTGAGGAAGAAAGTGAGGAGGA	1	91	1.08052e-05
197-GAAAGTGAG_316-AG	1	93.1	1.08052e-05
88-ACC_191-GAGGAAGAAAGTGAG	1	93.4	1.08052e-05
201-GTGAGG_324-T	1	88.9	1.08052e-05
21+CAGGACGAAAGGA_33+AATGCATGGGGAACAGGGCAAAAATGTCCGCCAT_51+ATTCAG_66+C_110+ATGCA_153+C_213+CCA_263-ACTAC_322+CGGCCCCCGGCTCATCA	1	42	1.08052e-05
203-GAGGAG_261+A_281-T_297+C	1	91	1.08052e-05
207-A_250-AACGG	1	91	1.08052e-05
20-CTG_76-AGGGATC	1	41.6	1.08052e-05
202-TGAGGA_248+TCGGCGGAGAAA	1	84.3	1.08052e-05
20-CTG_40+CCCCGCGAAAATGCAT_80-AT_97-C_143-T_163+CCCGT_185+GCGGCGGCTTGCGCGGCT_227+CCGC_252+AACATCAGGTCGCTCATGTCGG_322+CGGCCCCCGGCTCATCA	1	42.5	1.08052e-05
250-AACGGA	1	92.5	1.08052e-05
20-CTG_33+AGGATCGCCCCGCGAAAATGCATGGGGAACAGGGCAAAAATGCCCGCCAT_51+ATTCAG_66+C_110+ATGCA_153+T_213+CCA_263-ACTAC_322+CGGCCCCAGGATCATCA	1	41.4	1.08052e-05
34+G_48+G_104-T_125+TGGCA_134+CCTTTGTAC_171-GAT	1	48.3	1.08052e-05
202-TGA_239-GAT	1	88.9	1.08052e-05
207+GTCAGATGCTACGAA	1	93.9	1.08052e-05
202-TGAGGA_260-GA	1	96.4	1.08052e-05
203+GAGGAC	1	97	1.08052e-05
200-AGTGAGGAG	1	95.2	1.08052e-05
200-AGT_228+A_246-A	1	89.5	1.08052e-05
62-T_203-GAGGAG	1	97.9	1.08052e-05
207+AGAGTC_323-G	1	90.8	1.08052e-05
74-G_191-GAGGAAGAAAGTGAG	1	93.4	1.08052e-05
207+GTGGATA	1	94.7	1.08052e-05
21+G_68-TGGG_83-TGTCT_174+GA	1	48.9	1.08052e-05
20-CTGC_50-C_143+CCTT_168+A_226+G_252+GCTC_290-AC	1	44.4	1.08052e-05
324-TAGA	1	91.3	1.08052e-05
204+GAA	1	97	1.08052e-05
207+AACGAC	1	95	1.08052e-05
203-GAGG_325-A	1	97.3	1.08052e-05
191+C_198-AAAGTGA	1	95.5	1.08052e-05
176+TGGCCGGTCCTTAAGAAGCGCGTGCGGCGGCT_201+ATAATAGATAAGCGCCGACAGTCCATACGACAGAAGG_217+AAAACA	1	45.5	1.08052e-05
208+AGTTAG	1	97.6	1.08052e-05
20+C_57+ACAGGGCAAAAATGCCCGCCATCAGCGCGGCC_75+TAGACCTGGAACACGGTGAAT_110+ATGCA_153+C_213+CCA_263-ACTAC_322+CGGCCCCCGGCTCATCA	1	41.3	1.08052e-05
207+AAAGTC_249-C	1	97.3	1.08052e-05
7-GG_203-GAGGAG	1	96.1	1.08052e-05
203+GAGGATGAGAAGGTTGGTGTTGTAGCATATGCAGTGGAAGCTGATTCGCTGCGGAGGTAGGATGAAAGC	1	81.8	1.08052e-05
69-G_205+CCACTT	1	95.6	1.08052e-05
206+GGTCGTT	1	96.2	1.08052e-05
202-TGAGGA_285+A	1	90.1	1.08052e-05
203-GAG_324-TA	1	97	1.08052e-05
205+CCACTT_244-G_276+A	1	86.1	1.08052e-05
207+GAA	1	97.3	1.08052e-05
203-GAGGAG_277+GTGaaa	1	83.1	1.08052e-05
206+CAAAGT	1	95.9	1.08052e-05
203-GAGGAGGAGGGTGGTAGTGCCACACAGAGAGCTTCGGATGTG_327-A	1	84.9	1.08052e-05
20-CTG_33+AGGATCGCCCCGCGAAAATGCATGGGGAACAGGGCAAAAATGCCCGCCAT_51+ATTCAG_71+T_110+ATGCA_153+C_213+CCA_263-ACTAC_322+CGGCCCCCGGCTCATCA	1	41.9	1.08052e-05
206+AACGAA	1	88.1	1.08052e-05
20+C_56+AACAGGGCAAAA_80-AT_97-C_143+AGCAGTGTTTCATGCATCACCC_227+CCGC_252+AACATCAGGTCGCTCATGTCGG_322+CTGCCCACGGCTCATCA	1	41.5	1.08052e-05
18-CA_66+C_110+ATGCA_153+C_194+CCCCTC_220-TGC_263-ACTAC_322+CGGCCGCCGGCTCATCA	1	43.9	1.08052e-05
20-CTGCCAGCACGTACTGCGCG_50-CC_87-T_152-GGGATG_206+TTGTGT	1	43.9	1.08052e-05
21-TGCCAGCACGTA_71+CGCCCC	1	50.5	1.08052e-05
20-CTGCCAGC_73-TGGAGGGATCTGTC_124-TC_154+CC_173-TCGATGTCGCAGC_213+AA_242+GCTGGCCGACTTCC_283-G_324+C	1	43.9	1.08052e-05
98-AAG_135+C_169-AC_177-TG_216-GTA_261-AGAC_278-ACATCGGAAGAAACGACGACGTT	1	47.5	1.08052e-05
209-GAGGGT_321-G	1	88.9	1.08052e-05
17+CC_33+AT_69-GGGG_112-ATAC_209+TCATAT_241-TG_275-TTCA_301-A_318+T	1	45.5	1.08052e-05
162-AGATGCTACGATCGATGTCGCAGCGAGGTGAGGAAGAAAGTGAGG_264+C_322-T	1	74.8	1.08052e-05
202-TGA_310-G	1	88.9	1.08052e-05
293-A	1	86.4	1.08052e-05
211+GAGTGAG_282-C	1	88.8	1.08052e-05
208-GGAGGG_250+GACGGA	1	85.8	1.08052e-05
203-GAG_317-G	1	89.2	1.08052e-05
207+GTGGGGA	1	96.2	1.08052e-05
203-GAGGAG_274-G	1	97.9	1.08052e-05
181-GCAGCGAGGTGAGGAAGAAAGT_327-A	1	91.3	1.08052e-05
291+TCG	1	52.4	1.08052e-05
203-GAGGAG_298+G_322-T	1	89.8	1.08052e-05
209+AGTCAA	1	68.9	1.08052e-05
203-GAGGAG_311-GAA	1	95.5	1.08052e-05
205+GAAAAG	1	94.1	1.08052e-05
188-GGTGAGGAAGAAAGTGAGGAGGAG	1	92.5	1.08052e-05
207+CTATATA	1	96.8	1.08052e-05
33-CT_50-CC_81+CCGCCACCT_120-ACTGTCT_163-GATG_217-T	1	45.9	1.08052e-05
206+GAGTGGATGGAGGAGGGTGTAGTGGAGTT	1	92	1.08052e-05
203-GAGGAG_255+AAAACACACCGAACGTAGAATGCAGATCCAACAA	1	82	1.08052e-05
203-GAGGAG_261-AGACTACCGTATTGTTCACATCGGAAGAAACGACGACGTTA	1	82.8	1.08052e-05
22-GCCAG_40-GGCTGACT_64+C_85+CTTGaaaaaaaa_203-GAGGAG	1	74.5	1.08052e-05
207+AAAGTA_322-T	1	95.9	1.08052e-05
46-CTGT_65-ATCTGGGG_118+ACCATATGGACGCC_166-GCTACGATCG	1	44.8	1.08052e-05
216+GAGGGT	1	96.4	1.08052e-05
223-CACACA	1	93.7	1.08052e-05
207+AAAGTC_244-G_329+G	1	88.2	1.08052e-05
35+C_57+ACAGGGCAAAAC_70+C_81-TCT_97-C_143-T_187+CAGGCGGCGGTTTGCGAGGATCT_228+CGCCAAAAGGCTGCCAATGATGTT_240+GCCGATA_263+GAAATGAGCAA	1	44.5	1.08052e-05
9-T_205+CCACTT	1	96.4	1.08052e-05
47+AGCGA_55-GAT_102+TTTC_175+TCGCCTGTTCG	1	46.4	1.08052e-05
20-CTG_33+AGGATCGCCCCGCGAAAATGCATGGGGAACAGGGCAAAAATGCCCGCCAT_64+ACCTGGA_110+ATGCA_153+C_213+CCA_263-ACTAC_322+CGGCCCCCGGCTCATCA	1	41	1.08052e-05
202-TGAGGA_247-T	1	94.9	1.08052e-05
272+C	1	52.9	1.08052e-05
127-TGGTGGTGAGGATGAGTCGGGCTGTGGGATGGATCAGATGCTACGATCGATGTCGCAGCGAGGTGAGGAAGAAAGTGAGGA_243-T_297+C_329-G	1	65.2	1.08052e-05
204+AGACTCT	1	96.2	1.08052e-05
208+AAT	1	91.6	1.08052e-05
206+GGAGAGT	1	96.8	1.08052e-05
20-CTG_33+AGGATCGCCCCGCGAAAATGCATGGGGAACAGGGCAAAAATGCCCGCCAT_51+ATTCAG_66+C_110+ATGCA_153+C_213+CCA_263-AC_296+C_321+CGCCCGGCTCATC	1	42.7	1.08052e-05
20-CTG_33+AGGATCGCCCCGCGAAAATGCATGGGGAACAGGGCAAAAATGCCCGCCAT_51+ATTCAG_66+C_110+ATGCA_153+C_213+CCA_263-ACTAC_322+CGGCCCCCAGCTCATCA	1	41.9	1.08052e-05
203-GAGGAG_326+G	1	95.5	1.08052e-05
34+G_48+G_104-TGT_134-GA_161+TTCGG_174+TTTGTTTAGC	1	48	1.08052e-05
132-GTGAGGATGAGTCGGGCTGTGGGATGGATCAGATGCTACGATCGATGTCGCAGCGAGGTGAGGAAGAAAGTGAGGA	1	77.1	1.08052e-05
206+AAAATT	1	94.1	1.08052e-05
203+GGA_312-A	1	96.7	1.08052e-05
205+GGGAAAG	1	97.3	1.08052e-05
181-GCAGCGA_217-TAGTGC_275-T_305+ATCAG	1	45.1	1.08052e-05
203-GAGGAG_290+aaaaaC	1	85.2	1.08052e-05
7-G	1	98.5	1.08052e-05
34+G_48+G_100-GAAGTGTAAC_166-GC	1	45	1.08052e-05
20-CTG_33+AGGATCGCCCCGCGAAAATGCATGGGGAACAGGGCAAAAATGCCCGCCAT_51+ATTCAG_66+C_110+ATGCA_153-GGATGGATC_176+GCAGC_202+CTCCGGCA_263-ACTAC_322+CGGCCCCAGGCTCATCA	1	41.7	1.08052e-05
288-AAACGACGA_313+G	1	57.5	1.08052e-05
203-GAGGAGGA	1	96.4	1.08052e-05
203-GAGGAG_310+A	1	89.8	1.08052e-05
203-GAGGAG_258-C_271+A	1	91	1.08052e-05
207+ATGTGAAGGTTGTTGTTGGAACATTTGCAGTGGAAGCTGACTCTGTACAGAAGTCTGTTGAGAAAACTC	1	81.3	1.08052e-05
172-ATCGATGTCGCAGCGAGGTGAGGAAGAAAGTGAGGA	1	88.9	1.08052e-05
207+C	1	99.1	1.08052e-05
193-GGAAGAAAGTGAG_303-G	1	83.4	1.08052e-05
19-ACT_45+CATCA_147+TAATAGATT	1	42.8	1.08052e-05
100-G_202-TGAGGA	1	91.6	1.08052e-05
25-AG_46-C	1	55.4	1.08052e-05
20+GGAATCAGCCT_33+AGC_138+CATAAAGCTA	1	49.4	1.08052e-05
20-CTG_33+AGGATCGCCCCGCGAAAATGCATGGGGAACAGGGCAAAAATGCCGGCCAT_51+ATTCAG_66+C_110+ATGCA_151+CGCGGGTCTACGTC_170+AG_248+C_305-G	1	43.1	1.08052e-05
74-G_207+AAAGTC	1	97.9	1.08052e-05
202-TGAGGA_277+a_322+A	1	86.5	1.08052e-05
205+AGGTGAG	1	94.7	1.08052e-05
206+GGTCGGT	1	96.5	1.08052e-05
207+AAAGTC_301+A_321-G	1	89.4	1.08052e-05
20-CTG_45+CGAAAATGCATGGGGAACAGGGCAAA_53+CCATCAGTGC_75+TAGACCTGGAACACGGTGAAT_110+ATGCA_153+C_213+CCA_263-ACTAC_322+CGGCCCCCGGCTCATCA	1	41.9	1.08052e-05
203-GAGGAG_250-A	1	95.5	1.08052e-05
206+GAAAAA	1	97.9	1.08052e-05
20-CTG_45+CATCA_89+G_102-AGTG_134-GA_160+ATTAG_174+ttttttttGC	1	50	1.08052e-05
88-ACC_188-GGTGAGGAAGAAAGT	1	87.7	1.08052e-05
203-GAGGAG_257+G	1	88.6	1.08052e-05
10-A_202-TGA	1	92.5	1.08052e-05
13-TGCGC_130-TGGTGAGGATGAGT_191+TATTTGC_231-GAGCTT	1	42.7	1.08052e-05
20-CTG_33+AGGATCGCCCCGCGAAAATGCATGGGGAACAGGGCAAAAATGCTCGCCAT_51+ATTCAG_66+C_110+ATGCA_153+C_213+CCA_263-ACTAC_322+CGGCCCCCGGCTCATCA	1	41.7	1.08052e-05
20-CTG_33+AGGATCGCCCCGCGAAAATGCATGGGGAACAGGGCAAAAATGCCCGCCAT_51+ATTCAG_66+C_110+ATGCA_153+C_213+CCA_263-ACTAC_322+CGCCCCCCGGTTCATCA	1	41.7	1.08052e-05
203-GAG_322-T	1	91.6	1.08052e-05
208+AGAAAG_306-T	1	89.3	1.08052e-05
191-GAGGAAGAAAGTGAG_322-T	1	94	1.08052e-05
25-AGCACGTACTGCGCGG_78-GGATCT_100-GAAGTG_123-GTCTTGGTGGTGA_161-CAGATGCTACG_186+CG	1	45.4	1.08052e-05
198-AAAGTGA	1	96.1	1.08052e-05
203-GAGGAG_310-G	1	93.4	1.08052e-05
107-AACGGATACGTTAACTGTCTTGGTGGTGAGGATGAGTCGGGCTGTGGGATGGATCAGATGCTACGATCGATGTCGCAGCGAGGTGAGGAAGAAAGTGAGGA	1	69.6	1.08052e-05
206+AAAAGT	1	95.9	1.08052e-05
207+CAAGTC_240+A_326-G	1	85.8	1.08052e-05
20+C_66+AAATTCCCGCCATCAGC_82+TCAGC_91+TGGAA_104+AGAGTCGC_252+ACCATCAGGTCACTCATGTCGG_322+CGGACCGAGCTCATCA	1	41.1	1.08052e-05
130-T_202-TGAGGA	1	95.5	1.08052e-05
13-T_191-GAGGAAGAAAGTGAG	1	94	1.08052e-05
52-G_206+GCTCTGT	1	96.5	1.08052e-05
220+GC_296+T_322+GATTTTGTTTTGCTGT	1	43.2	1.08052e-05
207+AAAGTC_308-C	1	97.3	1.08052e-05
192-AGGAAGA	1	95.5	1.08052e-05
20-CTG_40+CCCCGCGAAAATGCAT_80-AT_97-C_143+AGCAGTCTTTCATGCATCACCC_227+CCGC_252+AACATCAGGTCGCTCATGTCGG_322+CGGCCCCCGGCTCATCA	1	40.7	1.08052e-05
20-CTG_33+AGGATCGCCCCGCGAAAATGCATGGGGAACAGGGCAAAAATGCCCGCCAT_51+ATTCAG_66+C_110+ATGCA_153+C_213+CCA_263-ACTAC_322+AGGACCCCGGCTCATCA	1	41.7	1.08052e-05
205+GGGTGCG	1	95.9	1.08052e-05
202-TGAGGA_321+G	1	95.8	1.08052e-05
196-AGAAAGT	1	95.8	1.08052e-05
208+AGGTC	1	90.5	1.08052e-05
206+GC	1	97.9	1.08052e-05
152-G_205+CCACTT	1	95.3	1.08052e-05
203-GAGGAG_321+G	1	94.9	1.08052e-05
22+A_63-G_203-GAGGAG	1	75.7	1.08052e-05
207+AAATAA	1	92.6	1.08052e-05
207-AGGAGGGTGGT	1	96.7	1.08052e-05
34+G_48+G_125+GGCACTTGTTGCTC_167-CTAC	1	44.8	1.08052e-05
207+ATGTGAAGGTTGTTGTTGGATCATTTGCAGTGGAAGCTGACTCTGTACTGAGGTCGGTTGTAGCCACCA	1	79.8	1.08052e-05
257+G_274-G	1	90.4	1.08052e-05
207-AGGA	1	97	1.08052e-05
200-AGTGAGG_222+C	1	85.3	1.08052e-05
179+CCCGTCCGTTTGAA_185+GCGGGGGCTTGCGCGGCA_227+CCGC_252+AACATCAGGTCGCACAGGTCGC_322+CGGCCCCCGGCTCATCA	1	42	1.08052e-05
208-GG_327-A	1	96.4	1.08052e-05
205+CCAAAG	1	96.2	1.08052e-05
20-CTG_34-T_45+AGCA	1	59.5	1.08052e-05
203-GAGGAG_292-G_321+T	1	86.2	1.08052e-05
168-TACGATCGATGTCGCAGCGAGGTGAGGAAGAAAGTGAGGAGG	1	85.2	1.08052e-05
207+AAAGTC_322+T	1	97.6	1.08052e-05
202-TGAGGA_249-C	1	91.3	1.08052e-05
34+G_48+G_125+GACA_134+CCTTTTTAC_174-CGA	1	46	1.08052e-05
20-CTG_40+CCCCGCGAAAATGCAT_75+CCAGGGAGTCATTCAGCGTGTAGACCTGGAACACGGTGAAT_115+TCCCC_155+GCTCTAC_220-TGC_263-ACTAC_322+CGGCCCCAGGATCATCA	1	41.4	1.08052e-05
13-T_208+AGAAAG	1	97.9	1.08052e-05
191-GAGGAAGAAAGTGAG_321-G	1	91.9	1.08052e-05
201+GCGAG_324-T	1	88.4	1.08052e-05
203-GAGGAG_261-A_301-A	1	87	1.08052e-05
178-GTCGCAGCGAGGTGAGGAAGAAAGTGAGGA	1	89.8	1.08052e-05
189-GTGAGGAAGAAAGTGAGGA_318-C	1	88	1.08052e-05
203+ATG_243-T	1	89.6	1.08052e-05
203+GAGGGTG	1	94.7	1.08052e-05
31-T_202-TGAGGA	1	66.3	1.08052e-05
207+ATGTGAAGGTTGTTGTTGGAGCATTTGCAGTGGAAGCTGAATCTGTACTGAGGTCTGGTGTGAAATAAA	1	80.5	1.08052e-05
127-TGG_203-GAGGAG	1	96.1	1.08052e-05
30+A_56+AACAGGGCAAAA_79-GA_97-C_143-T_187+CAGGCGGCGGCTTGCGCGGCTCT_226+GCCG_252+AACATCAGGTCGCTCATGTCGG_322+CGGCCCCCGGCTCATCA	1	41.8	1.08052e-05
261+A	1	88.3	1.08052e-05
208+CGATCG	1	96.4	1.08052e-05
191-GAGGAAGAAAGTGAGG	1	94.6	1.08052e-05
241+T_305-G	1	89.2	1.08052e-05
207+AAAGAC_322-T	1	96.7	1.08052e-05
207+AAAGTC_274-G	1	87.9	1.08052e-05
203+GGA_325-A	1	96.7	1.08052e-05
206+GAGTGAGAAGTAGGGAGAGTGAT	1	92.7	1.08052e-05
69-G_191-GAGGAA_255-A_329+G	1	88	1.08052e-05
171-GATCGATGTCGCAGCGAGGTGAGGAAGAAAGTGAG	1	81.3	1.08052e-05
208+GGAAGGT	1	96.8	1.08052e-05
207+GTATGTA	1	96.5	1.08052e-05
214+TGGAGGT	1	96.2	1.08052e-05
207+AAAATC_329-G	1	89.1	1.08052e-05
205+GGGTGAG_244-G	1	95.9	1.08052e-05
207+ATGTGAAGGTTGTTGTTGGATCATTTGCAGTGGAAGCTGACTCTGTACTGAGGTATGTTGAGACCTACA	1	81	1.08052e-05
20-CTG_33+AGGATCGCCCCGCGAAAATGCATGGGGAACAGGGCAAAAATGCCCGCCAT_51+ATTCAG_66+C_110+ATGCA_155+GCTCTACGTCCGTCAGC_166-G	1	40.6	1.08052e-05
191-GA_203-GAGGAG	1	97.6	1.08052e-05
69-GG_203-GAGGAG	1	97.6	1.08052e-05
206+GGTGGAA	1	96.5	1.08052e-05
207+CTCTGTA	1	90.6	1.08052e-05
112+CATTTC_134+CCTTTGTA_152+A_174-CGA	1	49	1.08052e-05
202+CGC	1	67.2	1.08052e-05
207+ATGTGAAGGTTGTTGTTGGATCATTTGCAGTGGAAGCTGACTCTGTACTGAGGTCTGTTGTGACCGCCA	1	81	1.08052e-05
10-A_21+A_203-GAG	1	77.8	1.08052e-05
204+AAAACT	1	97.3	1.08052e-05
203-GAGGAG_320+GA	1	88.9	1.08052e-05
206+GCTAGGT	1	97.3	1.08052e-05
207+AATTTA	1	97.6	1.08052e-05
203-GAGGAG_255+A_283-G	1	86.2	1.08052e-05
20-CTG_33+AGGATCGCCCCGCGAAAATGCATGGGGAACAGGGCAAAAATGCCCGCCAT_51+ATTAAG_66+C_110+ATGCA_162+GGCCGGCAGCAAATAACAGCT_218-AGTGCC	1	41	1.08052e-05
203-GAG_238-GG	1	96.4	1.08052e-05
126-T_203-GAGGAG	1	97	1.08052e-05
206+GGAA	1	97.3	1.08052e-05
169-ACGATCGATGTCGCAGCGAGGTGAGGAAGAAAGTG	1	87.3	1.08052e-05
73+GT_119-AA_162-A_177-TGTCG_233-GCTTC	1	48.8	1.08052e-05
203-GAG_279-C_315+A_326-G	1	89.8	1.08052e-05
9-T_206-GA	1	97.9	1.08052e-05
203-GAGGAG_311-GA	1	93.1	1.08052e-05
197-GAAAGTGAG_264-C	1	83.4	1.08052e-05
12-AT_203-GAGGAG	1	96.1	1.08052e-05
208+ATATAG	1	97.9	1.08052e-05
20+CCAGGACGAAAGGATCGCCCCGCGAAAATGCATGGGGAACAGGGCAAAAATGC_66+C_110+ATGCA_153+C_213+CCA_263-ACTAC_322+CGGCCCCCGGCTCATCA	1	40.5	1.08052e-05
20-CTG_33+AGGATCGCCCCGCGAAAATGCATGGGGAACAGGGCAAAAATGCCCGCCAT_51+ATTCAG_66+C_115+TCCCC_155+GCTC_263-ACTAC_322+CGGCCCCCGGCTCATCA	1	40.5	1.08052e-05
11+G_32-ACTGCG_55-GA_110-G_140-G_177+ACGGTGTGTTATAGACGTAG_217+CA_232+C_247+GCAGG_279+GC_314+TCCACC	1	47.7	1.08052e-05
207+AAGGTA_248-A	1	89.6	1.08052e-05
20-CTG_33+AGGATCGCCCCGCGAAAATGCATGGGGAACAGGGCAAAAATGCCCGCCAT_51+ATTCAG_66+C_110+ATGCA_153+C_213+CCA_263-ACTAC_322+CGGCCCTGGCTCATCA	1	41.8	1.08052e-05
45-ACTGTCCGGGGATGCGATGTAT_193-GG_226+TG_283-GG	1	42.2	1.08052e-05
209+A	1	95.5	1.08052e-05
14-G	1	98.5	1.08052e-05
20-CTG_40+CCCCGCGAAAATGCAT_80-AT_97-C_143-T_167+TGGCCCGTCCT_185+GCTTGCGCGGCT_227+CCGC_252+AACATCAGGTCGCTCATGTCGG_322+CTGCCCCCGGCTCATCA	1	42.3	1.08052e-05
207+AGAGTA_265-T	1	97.3	1.08052e-05
30-GT_51+GCAACGTGT_81+G_95+ACTCGAGAAAGGCGAAGATCTGC_108+T_129+C_139+ACGTCCG	1	50.2	1.08052e-05
18-CACTGCCAGCACG_50-CCGGGGATGCGATGTATCTGGGGTGGA_112+T	1	41.7	1.08052e-05
60-GATGTATCTGGGGTGGAGGGATCTGTCTACCACCGGGCAAGAAGTGTAACGGATACGTTAACTGTCTTGGTGGTGAGGATGAGTCGGGCTGTGGGATGGATCAGATGCTACGATCGATGTCGCAGCGAGGTGAGGAAGAAAGTGAG	1	56	1.08052e-05
203-GAGGAG_285+A	1	88.6	1.08052e-05
43-TGACT_68+GACAGCCGTCTCGGACAG_78+A_97-CA	1	51.2	1.08052e-05
20-CTG_78+A_114-AC_142-G_166-GCTACG_180+A	1	46.7	1.08052e-05
34+G_48+G_91-ACCGGGCAA	1	43.6	1.08052e-05
232-AGC	1	91.3	1.08052e-05
206+GAAAGA_283+G_324-T	1	87.3	1.08052e-05
218-A	1	92.9	1.08052e-05
203-GAGGAG_283-G	1	96.1	1.08052e-05
203+GAAAAA	1	96.7	1.08052e-05
20-CTG_33+AGGATCGCCCCGCGAAAATGCATGGGGAACAGGGCAAAAATGCCCGCCAT_51+ATTCAG_66+C_110+ATGCA_153+C_213+CCA_263-ACTAC	1	42.5	1.08052e-05
157-GG_179-TCGCAGCGAGGT	1	83.5	1.08052e-05
69-G_202-TGAGGA	1	96.7	1.08052e-05
271+G	1	54	1.08052e-05
208+CTGTAG	1	89.1	1.08052e-05
203-GAGGAG_298-G	1	85.8	1.08052e-05
217-T	1	98.2	1.08052e-05
128+TAAGAGAGTGGTGGTTAA_139+GTGTTTCATGCATCACTCGTGGTCGATCCTTTTGAATCGCAGTCGGCGGCTTGCG_175+CT	1	44.5	1.08052e-05
202-TGAGGA_323+G	1	96.4	1.08052e-05
206+T	1	99.1	1.08052e-05
203-GAGGAG_323+G	1	97.9	1.08052e-05
207+AATGAC	1	96.4	1.08052e-05
220+GA_296+T_322+GATTTTGTTTTGCTGT	1	42.7	1.08052e-05
205+CAACTT_325-A	1	96.4	1.08052e-05
34+G_48+G_125+GGCACTTGTTGCTC_155-A_171-GAT	1	48.3	1.08052e-05
33-CTG_76-AGGGATC	1	42.1	1.08052e-05
206+GGTCAGATGGTAGGT	1	94.5	1.08052e-05
34+G_48+G_104-TGT_134-GA_173+GTGGATTTTGTTTTG	1	45.6	1.08052e-05
21-TG_42+ACT_65-A_202-TGAGGA	1	77.9	1.08052e-05
203-GAGGAG_247+T_270-T_324+T	1	87.7	1.08052e-05
207+GTGGTGATGAAACACGTAGGGCTACAA	1	82.2	1.08052e-05
205+ACACTG	1	96.7	1.08052e-05
207+ATGAGC	1	98.2	1.08052e-05
10-A_203-GAGGAG_324-T	1	96.1	1.08052e-05
208+AAGTGG_310-GG	1	89.9	1.08052e-05
203-GAGGAG_262-G_306+AAGA	1	85.1	1.08052e-05
166-GCTACGATCGATGTCGCAGCGAGGTGAGGAAGAAAGTGAGGAG	1	77.4	1.08052e-05
10-A_206-GA	1	97.9	1.08052e-05
20-CTG_33+AGAATCGCCCCGCGAAAATGCATGGGGAACAGGGCAAAAATGCCCGCCAT_51+ATTCAG_66+C_110+ATGCA_153+C_213+CCA_263-ACTAC_322+CGGCCCCAGGATCATCA	1	41.7	1.08052e-05
123-GTCTTGGTGGTGA_205-GGAGGAGGGTG	1	42.6	1.08052e-05
20-CTGC_42+ACT_202-TGAGGA	1	86.9	1.08052e-05
203-GAGGAG_246+ATA	1	93.4	1.08052e-05
206+GATAGT	1	97.9	1.08052e-05
20-CTG_33+AGGATCGCCCCGCGAAAATGCATGGGGAATAGGGCAAAAATGCCCGCCAT_51+ATTCAG_66+C_110+ATGCA_153+C_213+CCA_263-ACTAC_322+CGGCCCCCAGCTCATCA	1	41.4	1.08052e-05
207+AAGTTC	1	96.7	1.08052e-05
207+ATGTGAAGGTTGTTGTTGGATCATTTGCAGTGGAAGCTGACTCTGTACTGAGGTCTGTTGTGACAACCA	1	81	1.08052e-05
207+GAAGTA	1	97.9	1.08052e-05
208+AGAAAT	1	98.2	1.08052e-05
206+GAAGGT	1	98.2	1.08052e-05
20+G_48+G_104-TGT_134-GA_161+TTCGG_174+TTTGATTTGC	1	47.1	1.08052e-05
7-G_205+GGGTGAG	1	95.9	1.08052e-05
207+AAAGTC_263-A	1	89.9	1.08052e-05
207+AATGTA	1	97	1.08052e-05
176-ATGTCGCAGCGAGGTGAGGAAGAAAGTGAGGA	1	90.1	1.08052e-05
20-CTG_33+AGGATCGCCCCGCGAAAATGCATGGGGAACAGGGCAAAAATGCCCGCCAT_51+ATTCAG_66+C_110+ATGCA_153+C_213+CCA_263-AC_296+C_321+CCCCCAGCTCATC	1	42.2	1.08052e-05
130-T_203-GAGGAG	1	94	1.08052e-05
126-TTGGTGGTGAGGATGAGTCGGGCTGTGGGATGGATCAGATGCTACGATCGATGTCGCAGCGAGGTGAGGAAGAAAGTGAGGA	1	74.4	1.08052e-05
203-GAGGAG_263-A_317+G	1	88.6	1.08052e-05
76-A	1	98.5	1.08052e-05
205+CTG	1	95.8	1.08052e-05
27+T_48+G_104-T_125+TGGCACTTGTTG_145+TTAT	1	46.8	1.08052e-05
138-A_203-GAGGAG	1	96.4	1.08052e-05
202-TGAGGA_321+T	1	88	1.08052e-05
207+AAACGC	1	97.9	1.08052e-05
207+GAAGTC_327-A	1	96.4	1.08052e-05
156-TGG_201-GTG	1	93.1	1.08052e-05
20-CTG_33+ATTATCGCCCCGCGAAAATGCATGGGGAACAGTGCAAAAATGCCCGCCAT_51+ATTCAG_66+C_110+ATGCA_155+GCTCTACGTCCGGCAGCCAATA_205+AAAACG_240+A_268-CGTATTGTTCACA	1	42.6	1.08052e-05
28-A	1	59.4	1.08052e-05
43-T_70+a_202-TGAGGA	1	76	1.08052e-05
20-CTG_33+AGGATCGCCCCGCGAAAATGCATGGGGAGCAGGGCAAAAATGCCCGCCAT_51+ATTCAG_66+C_110+ATGCA_153+C_213+CCA_263-ACTAC_322+CGGCCCCAGGCTCATCA	1	41.7	1.08052e-05
207+ATGATC	1	97.9	1.08052e-05
202+TGAGGA	1	97.9	1.08052e-05
203+GACAGC	1	97	1.08052e-05
206+GAAAGA	1	98.2	1.08052e-05
23+C_44-G_202-TGAGGA	1	82	1.08052e-05
205+CCTCTT	1	96.7	1.08052e-05
20+C_57+ACAGGGCAAAAATGCCCGCCATCAACGCGGCC_75+TAGACCTGGAACACGGTGAAT_110+ATGCA_170-CGAT_197+AGCCCCCCCGC_236+CATG_244+C_294+GCC_306+C	1	43.1	1.08052e-05
263-A_282+C_322-T	1	90.7	1.08052e-05
205+CGACTG	1	97	1.08052e-05
203-GAG_266-A_322-T	1	90.4	1.08052e-05
46+TCTCG_202-TGAGGA	1	71.1	1.08052e-05
211-GGG_325-A	1	97.3	1.08052e-05
203-GAGGAG_303-G	1	87	1.08052e-05
34+G_48+G_89+G_110+ATTTCATTAGTGT_155-A_161-CA_176-A	1	50.2	1.08052e-05
165-TGCTACGATCGATGTCGCAGCGAGGTGAGGAAGAAAGTGAGGAGG_321-G	1	77.1	1.08052e-05
205+GGCTGGCATGCAACG	1	91.4	1.08052e-05
203+ATC_323-G	1	96.1	1.08052e-05
206+GGTAGAT	1	96.5	1.08052e-05
110-G_203-GAGGAG	1	95.5	1.08052e-05
206-GA_324-T	1	97.3	1.08052e-05
23-CCAGC_65-A_73+CCTTC_110+AGCAGAGG	1	48.7	1.08052e-05
203+TTA	1	94.9	1.08052e-05
208-GGAGGGTGG	1	95.8	1.08052e-05
69-G_203-GAGGAG_320-A	1	97.6	1.08052e-05
205+ATG	1	97	1.08052e-05
206+AAGTAT	1	91.7	1.08052e-05
206+GAAGAA	1	98.2	1.08052e-05
208+GAGCAC	1	96.4	1.08052e-05
26+CGAAAGGATCGCCCCGCGAAAATGCATGGGGAACAGGGCAAAAATGC_51+ATTCAG_66+C_110+ATGCA_153+C_213+CCA_263-ACTAC_322+CGGCCCCCGGCTCATCA	1	41.3	1.08052e-05
20+C_57+ACAGGGCAAAAATGCCCGCCATCAGCGCGGCC_75+TAGACCTGGAACACGGTGAAT_110+ATGCA_153+C_213+CAA_263-AC_296+C_320+GCCCCAGGCTCAT	1	42.3	1.08052e-05
30-GT_69+GCTCAATGAC_96+ATCGTGAAAGGCGAAGATCT_103+AAAGG_120+CTG_147+TCCT	1	49.3	1.08052e-05
207+GAAA	1	97	1.08052e-05
205+CCATTT	1	92.6	1.08052e-05
30+A_56+AACAGGGCAAAA_70+C_81-TCT_97-C_143-T_167+GGGCCCATCCT_185+GCTTGCGCGGCT_203+AACAGATAAGCGCCGACAGCCCATCCGCCAG_263-ACTAC_322+CGGCCCCAAGCTCATCA	1	43.6	1.08052e-05
205+CCACTT_244-G	1	87.9	1.08052e-05
20-CTG_45+CGAA_57+ACAGTGTAAAAATG_144+GTTTCATGCATCACCCG_227+CCGC_252+AACATCAGGTCGCTCATGTAGG_299+CCCA_320+GCCCCAGGCTCAT	1	41.5	1.08052e-05
205+CAAATT	1	96.4	1.08052e-05
184-GCGAGGTGAGGAAGAAAGTGAGGAG	1	91.3	1.08052e-05
205+GGTAG	1	96.4	1.08052e-05
197-GAAAGTGAG_324-T	1	85.8	1.08052e-05
202-TGA_325-A	1	93.7	1.08052e-05
73-T_191-GAGGAA	1	91	1.08052e-05
204+TAT	1	96.4	1.08052e-05
20-CTG_33+AGGATCGCCCCGCGAAAATGCATGGGGAACAGGGCAAAAATGGCCGCCAT_66+CTGGAAC_110+ATGCA_153+C_213+CCA_263-AC_296+C_320+GCCGCCGGCTCCT	1	41.7	1.08052e-05
30+A_57+ACAGGGCAAAAATGCCCGCCATCAGCGCGGCC_75+TAGACCTGGAACACGGTGAAT_110+ATGCA_153+C_213+CCA_263-ACTAC_322+CGGCCCCCGGCTCATCA	1	41.3	1.08052e-05
201+GTG	1	97.6	1.08052e-05
103-GTGTAACGGATACGTTAACTGTCTTGGTGGTGAGGATGAGTCGGGCTGTGGGATGGATCAGATGCTACGATCGATGTCGCAGCGAGGTGAGGAAGAAAGTGAGG	1	67.8	1.08052e-05
157-GGATCAGATGCTACGATCGATGTCGCAGCGAGGTGAGGAAGAAAGTGAGGAGGA	1	70.8	1.08052e-05
211-GGGTGG	1	82.5	1.08052e-05
20-CTG_33+AGGATCGCCCCGCGAAAATGCATGGGGAACAGGGCAAAAATGCCCGCCAT_51+ATTCAG_66+C_110-GG_125+GGCC_175-G_196+C_242+CG_322+CTGCCCCAGGCTCATCA	1	42.9	1.08052e-05
74-G	1	97.3	1.08052e-05
207+ATGTGAAGGTTGTTGTTGGATCATTTGCAGTGGAAGCTGACTCTGTACTGAGGTCTGTTGTGGCATACA	1	81	1.08052e-05
202-TGAGGA_325-AG	1	86.7	1.08052e-05
20-CTG_33+AGGATCGCCCCGCGAAAATGCATGGGGAACAGGGCAAAAATGCCCGCCAT_51+ATTCAG_66+C_110+ATGCA_153+C_213+CCA_263-ACTAC_322+CGGCCCACGGCTCATCA	1	41.7	1.08052e-05
207+A_313+G_321-G	1	92.8	1.08052e-05
46-CTGTCCGG	1	55.6	1.08052e-05
59-CGATGTAT	1	43.4	1.08052e-05
64-T_203-GAGGAG	1	94	1.08052e-05
189-GTGAGGAAGAAAGT	1	93.7	1.08052e-05
212+GAGGAT	1	95.9	1.08052e-05
207+AAAGTA_322+T	1	93.8	1.08052e-05
107-A_202-TGAGGA	1	96.7	1.08052e-05
247-T	1	87.3	1.08052e-05
209+AGTGAA	1	87.9	1.08052e-05
248-A	1	89.8	1.08052e-05
206+A_317+G	1	84.4	1.08052e-05
203-GAGGAG_263+A_279-C	1	91.3	1.08052e-05
81-TCTGTCTACCACCGGGCAAGAAGTGTAACGGATACGTTAACTGTCTTGGTGGTGAGGATGAGTCGGGCTGTGGGATGGATCAGATGCTACGATCGATGTCGCAGCGAGGTGAGGAAGAAAGTGAGGAG	1	59.6	1.08052e-05
203-GAGGAG_280-A	1	89.2	1.08052e-05
20-CTG_33+AGGATCGCCCCGCGAAAATGCATGGGGAACAGGACAAAAATGCCCGCCAT_51+ATTCAG_66+C_110+ATGCA_153+C_213+CCA_263-ACTAC_322+CGGCCCCCGGCTCATCA	1	41.9	1.08052e-05
22+A_57+ACAGGGCAAAAATGCTCGCCATCAGCGCGGCC_75+TAGACCTGGAACACGGTGAAT_110+ATGCA_155+TCAC_267-CC_298+CATCAAGCCAAGCA	1	42.8	1.08052e-05
80-A_207+AAAGAA	1	93.5	1.08052e-05
177-T_197+TG_215-GGTA	1	49.5	1.08052e-05
208+CAG	1	92.5	1.08052e-05
203-GAGGAG_264-CTACCGTATTGT	1	86.4	1.08052e-05
207+GTGGGAA	1	96.2	1.08052e-05
69-G_208+AGAAAG	1	97.9	1.08052e-05
206+GAAAGT_292-G	1	85.8	1.08052e-05
21+GCCGTACACGAG_112-A_129+AC	1	46.7	1.08052e-05
205-GGAGG_256+AG_281-TC_326+T	1	87.5	1.08052e-05
223-CA	1	97.6	1.08052e-05
202-TGAGGA_305-G	1	87	1.08052e-05
203-GAGGAG_257+G_308-C	1	87.4	1.08052e-05
191+C_203-GAGGAGG_282+C_327-A	1	89.2	1.08052e-05
207+GCA	1	98.2	1.08052e-05
206+CTGATT	1	95	1.08052e-05
22+AGGACGAAAGGATCGCCCCGCGAAAATGCATGGGGAACAGGGCAAAAATGCCC_66+C_110+ATGCA_155+GGTC_263-ACTAC_322+CGGCCCCCGGCTCATCA	1	41.3	1.08052e-05
163+C_219-G_266-ACCG_299+GT_315+TT	1	45.9	1.08052e-05
204+ACGACT	1	96.7	1.08052e-05
34+G_48+G_125+GGCA_134+CCTTTGTACGCAA_152+A_174-CGA	1	46.9	1.08052e-05
205+GGAACTG	1	96.5	1.08052e-05
205+GGGTGAG_317-GCG	1	87.6	1.08052e-05
186+T_206-GA	1	52.5	1.08052e-05
208+AGATCG	1	97	1.08052e-05
20-CTG_40+CCCCGCGAAAATGCAT_80-AT_97-C_143-T_167+TGGCCCGTCCT_185+GCTTGCGGGGCT_227+CCGC_252+AACATCAGGTCGCTCATGTCGG_322+CGGCCGCCAGCTCATCA	1	42	1.08052e-05
169-ACGATCGATGTCGCAGCGAGGTGAGGAAGAAAGTGAGGAG	1	87.3	1.08052e-05
205+GGATGG	1	97.9	1.08052e-05
45-ACTGTCCGGGGATGCGATGTAT_193-GG_208-GGAGGGTGGTAGTGCCAC_254-GAAGC_307-G	1	42.2	1.08052e-05
64+CAAAAATGCCCGCCA_145+TTTCATGCATAACCCGT_228+CGCCAAAAGGCTGACAATGATGTT_240+GTCGCTC_263-AC_298+CAACGAGCCACACA	1	39.9	1.08052e-05
207+GAAAAA	1	97	1.08052e-05
148-C_203-GAG	1	97	1.08052e-05
207+AAAGTC_268-CGT	1	83.7	1.08052e-05
123-GTCTTGGTGGTGAGGATGAGTCGGGCTGTGGGATGGATCAGATGCTACGATCGATGTCGCAGCGAGGTGAGGAAGAAAGTGAGGAG	1	72.3	1.08052e-05
203-GAG_255-A_326+G	1	89.5	1.08052e-05
177-TGTCGC	1	81.3	1.08052e-05
21+CAGGACGAAAGGA_80-AT_97-C_124-T_167+TGGCCCGTCCT_185+GCTTGGGCGGCT_226+TCCG_271+CGGTTGTCGAGTAGCTCAGGAA_322+CGGCCCCCGGCTCATCA	1	41.8	1.08052e-05
181-GCAG_197-GAAAGT_233-GCT_279+AAGG	1	44.9	1.08052e-05
137-GATGAGTCGGGCTGTGGGATGGATCAGATGCTACGATCGATGTCGCAGCGAGGTGAGGAAGAAAGTGAGGAGGA	1	77.1	1.08052e-05
207+AAAGGC_323-G	1	97.6	1.08052e-05
211-G	1	98.2	1.08052e-05
207+AAAGTC_305+T	1	84.7	1.08052e-05
201-GTGAGGAGGAGG	1	94.3	1.08052e-05
208+ATTTCG	1	95.6	1.08052e-05
30+A_57+ACAGGGCAAAAATGCCCGCCATCAGCGCGGCC_75+TAGACCTGGAACACGGTGAAT_115+TCCCC_153+C_213+CCA_263-ACTAC_322+CGGCCCCCGGCTCATCA	1	41	1.08052e-05
324+T	1	88.9	1.08052e-05
10-A_205+GGGTGAG	1	96.2	1.08052e-05
206+GAGCAGATGATACGT	1	93.7	1.08052e-05
213+AGGTA	1	94.4	1.08052e-05
205+GGATAG	1	97.9	1.08052e-05
207+AAAGGC_319-G	1	87	1.08052e-05
20-CTG_33+AGGATCGCCCCGCGAAAATGCATGGGGAACAGGGCAAAAATGCCCGCCAT_51+ATTCAG_66+C_110+ATGCA_153+C_213+CCA_263-ACTAC_322+CGGCCGCCGGCTCATCA	1	41.7	1.08052e-05
12+CT_45+C_202-TGAGGA	1	78.3	1.08052e-05
10-A_203-GAGGAG_323-G	1	96.1	1.08052e-05
168-TACGATCGATGTCGCAGCGAGGTGAGGAAGAAAGTGAGGA	1	87.7	1.08052e-05
203-GAG_314-G	1	88.6	1.08052e-05
20+ATTACCATCAACG_55+TCGGACCA_74-G	1	50	1.08052e-05
203-GAG_238+G_271-A	1	91.9	1.08052e-05
204+TCT	1	96.7	1.08052e-05
67-CTGGGGTGGAGGGATCTGTCTACCACCGGGCAAGAAGTGTAACGGATACGTTAACTGTCTTGGTGGTGAGGATGAGTCGGGCTGTGGGATGGATCAGATGCTACGATCGATGTCGCAGCGAGGTGAGGAAGAAAGTGAGGA	1	57.5	1.08052e-05
207+AAAGGT	1	98.2	1.08052e-05
26+C_203-GAGGAG	1	73.2	1.08052e-05
206+GAAAGT_298-GTT	1	88.8	1.08052e-05
202-TGAGGA_321-GT	1	96.4	1.08052e-05
20-CTG_33+AGGATCGCCCCGCGAAAATGCATGGGGAACAGGGCAAAAATGCCCGCCAT_51+ATTCAG_66+C_110+ATGCA_153+C_213+CCA_263-ACTAC_322+CGGCCGCAGGCACATCA	1	41.7	1.08052e-05
202-TGAGGA_284+A_308-C	1	89.5	1.08052e-05
21+CAGGACGAAAGAA_33+AATGCATGGGGAACAGGGCAAAAATGCCCGCCAT_51+ATTCAG_66+C_115+TCACC_153+CGGCTCTACGTCCGGCA_167-C	1	44.6	1.08052e-05
20-CTGCCAG_46-CTG	1	59	1.08052e-05
207+AACATC	1	96.2	1.08052e-05
207+AAGGAC	1	97.9	1.08052e-05
43+AT_125+GGCA_134+CCTTTGTAC_171-GAT	1	45.5	1.08052e-05
46-CTGT_65-ATCTGGGG_105-GTAA_127+A	1	47.7	1.08052e-05
205+AGG_324-T	1	87.5	1.08052e-05
77-G	1	92.8	1.08052e-05
202-TGAGGA_295+G_325-A	1	89.5	1.08052e-05
89-C_203-GAGGAG	1	95.8	1.08052e-05
202-TGA_327-A	1	92.8	1.08052e-05
215+GAGACA	1	89.6	1.08052e-05
203-GAG_225+C_323-G	1	88.3	1.08052e-05
207+GAGACA	1	97	1.08052e-05
178-GTCGCAGCGAGGTGAGGAAGAAAGTGA	1	89.8	1.08052e-05
206+GGAAGT	1	96.4	1.08052e-05
207+ATGTGAAGGTTGTTGTTGGATCATTTGCAGTGGAAGCTAACTCTGTACTGAGGTCTGTTGTGACCTACA	1	81	1.08052e-05
208+AGGACG	1	97	1.08052e-05
25-A_45+AGCAA_127-TG_140-GAGTCGG	1	50	1.08052e-05
206-GA_294-C	1	86.7	1.08052e-05
180-CGCAGCGAGGTGAGGAA	1	91.6	1.08052e-05
20+CGACATAGTTGT	1	48.6	1.08052e-05
207+CAAGAC	1	95.9	1.08052e-05
203+GAGAAA	1	97.9	1.08052e-05
191-GAGGAAGAAAGTGAG_271-A	1	94.3	1.08052e-05
144-CGGGCTGTGGGATGGATCAGATGCTACGATCGATGTCGCAGCGAGGTGAGGAAGAAAGTGAG	1	80.1	1.08052e-05
207+ACTGTC	1	97	1.08052e-05
207+AAATAC	1	96.4	1.08052e-05
209-GAGGGT_327-A	1	93.4	1.08052e-05
183-AGCGAGGTGAGGAAGAA	1	87.7	1.08052e-05
207+ATGTGAAGGTTGTTGTTGGATCATTTGCAGTGGAAGCTGACTCTGGACTGAGGGCTGTGGTGACCTCCA	1	80.2	1.08052e-05
203-GAGGAG_292+G	1	90.7	1.08052e-05
69-G_89+C_205+CCACTT	1	93.5	1.08052e-05
203+GACACA	1	95	1.08052e-05
207+ATGTGAAGGTTGTTGTTGGATCATTTGCAGTGGAAGCTGACTCTGTACTGAGGTCTGTTGTGGCCTCAA	1	80.8	1.08052e-05
18+CCGCCAT_67-CTGGGGTG_110+ATGCA_153+C_213+CCA_263-ACTAC_322+CGGCCCCCGGCTCATCA	1	43.3	1.08052e-05
207+AAAGTC_225-C	1	91.4	1.08052e-05
20+GGAATCAGCCT_33+AGC_91-ACCGGGCAAGAAGTGTAACG_143+GATT	1	47.9	1.08052e-05
206+GAAAGA_263+A_310-G	1	87.9	1.08052e-05
203-GAGGAG_240-A	1	96.4	1.08052e-05
240+GGATT_257-G_282+TGAAC_290+GGCTAC	1	45.9	1.08052e-05
203+AAGAAGG	1	95.6	1.08052e-05
30+A_56+AACAGGGCAAAA_80-AT_97-C_143-T_167+TGGCCCGTCCT_185+GCTTGCGCGGCT_226+TCCG_252+AACATCAGGTCGCTCATGTCGG_322+CGGCCCCCGGCGCATCA	1	42.3	1.08052e-05
203-GAGGAG_257-G	1	87.7	1.08052e-05
205+CCACTT_329-G	1	91.7	1.08052e-05
211+GAAGGTTGTTGTTGGATCATTTGCAGAGGAAGCTGACTCTATGCTGAAGTCAGTTGAGGCATAAAGTGT	1	81.3	1.08052e-05
199-AAGTGAGG_279-C	1	88	1.08052e-05
20-CTGC_50-C_143+CCTT_168+A_215-GGTAGTGCCACA_254-GAAGC_305+GGCGGCAGCTTCCACCA_316+TAC	1	43.7	1.08052e-05
207+ATGTGAAGGTTGTTGTTGGATCATTTGCAGTGGAAGCTGACTCGGTACTGAGGTGTGTTGTGGAAGAAA	1	81	1.08052e-05
208+AAGGCC	1	96.4	1.08052e-05
209+GATGGTGGTAGTGCCAGAGCGAGAGCTTCGGATGTGGATACGTCGGAGCGATAAGGATGACAGTCACGGTGCGAGGGATAGAGGAGGAAGAGGATCAAGTAAAGTGGTGCGAGAGCGGCTGCGGCCAGGTGCAAAAGTAGATGAGGAGAGAAAT	1	66.5	1.08052e-05
206+GATGAGGAGGCTGTTGTTGGAATATTTGCAGTGGAAGCTGCGACTGTACAGAGGTGTGAGGAAGAAAGT	1	81.8	1.08052e-05
20-CTG_33+AGGATCGCCCCGCGAAAATGCATGGGGAACAGGGCAAAAATGCCCGCCAT_51+ATTCAG_66+C_110+ATGCA_151+C_213+CCA_263-ACTAC_322+CGGCCCCCGGCTCATCA	1	41.7	1.08052e-05
34+G_48+G_125+GGCA_134+CCTTTGTACGTA_169-ACGATC	1	46.3	1.08052e-05
10-A_191-GAGGAA	1	94.3	1.08052e-05
323-GTA	1	97.9	1.08052e-05
207+ACA	1	97	1.08052e-05
202-TGAGGA_255+A_301-A	1	94	1.08052e-05
208+GAGGCG_322-T	1	92.9	1.08052e-05
80-A	1	91.9	1.08052e-05
7+G_203+GGA	1	96.7	1.08052e-05
20-CTG_40+CCCCGCGAAAATGCAT_70+C_91+GTGTAG_115+GTCGC_135+T_145+ACCCGT_153+C_179-T_203+AACA_252+AACATCAGCCCGCTAATGTCGG_322+CGGCGCAGGATCATCA	1	44.6	1.08052e-05
205+GGCTAGG	1	92	1.08052e-05
205+ACACAG	1	97	1.08052e-05
21-TG_42+ACT_65-A_203-GAGGAG	1	75.2	1.08052e-05
20-CTG_33+AGGATCGCCCCGCGAAAATGCATGGGGAACAGGGCAAAAATGCCCGCCAT_51+ATTCAG_66+C_110+ATGCA_153+C_213+TCA_263-ACTAC_322+CGGCCCCCGGCTCATCA	1	41.7	1.08052e-05
7-G_206-GA	1	97.6	1.08052e-05
216+AGAGAC	1	91.7	1.08052e-05
292-G	1	84.9	1.08052e-05
124-TCTTGGTGGTGAGGATGAGTCGGGCTGTGGGATGGATCAGATGCTACGATCGATGTCGCAGCGAGGTGAGGAAGAAAGTGAGGA	1	73.8	1.08052e-05
202-TGAGGA_263-A_280+A	1	90.7	1.08052e-05
202-TGAGGA_264+GC_317-GC	1	88	1.08052e-05
204+ACAGCT	1	97.3	1.08052e-05
188-GGTGAGGAAGAAAGTGAGGAG	1	93.1	1.08052e-05
209+TGGAGTGACAAGGATGTAGTGGAGTGGAT	1	87.8	1.08052e-05
205+CGAAAG	1	95.6	1.08052e-05
133-T_201+GGG	1	95.5	1.08052e-05
18+A_48-G_202-TGAGGA	1	85	1.08052e-05
197-GAAAGTGAG_323-G	1	95.8	1.08052e-05
203-GAGGAG_308-C	1	91.9	1.08052e-05
52-GGGGAT_97-CA_173-TCGATGTCGC	1	48.1	1.08052e-05
21-TG_42+ACT_65-A	1	80	1.08052e-05
21-TG_42+ACT_65-A_201-GTGAGG	1	70.7	1.08052e-05
20-CTG_33+AGGATCGCCCCGCGAAAATGCATGGGGAACAGGGCAAAAATGCCCGCCAT_51+ATTCAG_66+C_110+ATGCA_155+GCACTACGTC_170+GTTAAG_248+C_306-T	1	42.3	1.08052e-05
191-GAG_207+AAAGTC	1	97.3	1.08052e-05
52-G_190-TGAGGAAGAAAGTGAGGA_322-T	1	90.7	1.08052e-05
203-GAGGAG_322+C	1	97.6	1.08052e-05
21+CAA_55-GAT_112-AT_136+T_143+AGC_168+G	1	51.5	1.08052e-05
207+ATGTGAAGGTGTTTATTGGAACATTTGCAGTGAAAGCTTACTCTGTACTAAGGTCTGTTGTGAACACCA	1	80.5	1.08052e-05
21-TGCCAGCACGTA_66-TCTGGGGTGGAGG	1	46.4	1.08052e-05
207+AAAGTC_245-GATACAACGGAAGCTGAGACT	1	90.2	1.08052e-05
205+GTGTGAG	1	96.5	1.08052e-05
203-GAG_253-G_285+A_298-G_312+A	1	91.6	1.08052e-05
202+CGACCA	1	96.2	1.08052e-05
20-CTG_33+AGGATCGCCCCGCGAAAATGCATGGGGAACAGGGCAAAAATGCCCGCCAT_51+ATTCAG_66+C_110+ATGCA_153+C_213+CCA_263-ACTAC_322+CGGCCCCCGACTCATCA	1	41.7	1.08052e-05
203+G	1	96.4	1.08052e-05
205+AAGGAG_294+C_325-A	1	87.3	1.08052e-05
20-CTG_36+ATCGCCCCGCGAAAATGCATGGGGAACAGGGCAAAAATGCC_60+ATTCAG_66+GACCTGGAAC_110+ATGCA_153+C_213+CCA_263-ACTAC_322+CGGCACCCGGCTCATCA	1	41.7	1.08052e-05
208+GTTACG	1	96.7	1.08052e-05
199-AAGTGAGG_324-T	1	89.5	1.08052e-05
141-A_203-GAGGAG	1	90.4	1.08052e-05
20-CTG_36+ATCGCCCCGCGAAAATGCATGGGGAACAGGGCAAAAATGCC_60+ATTCAG_66+GACCTGGAAC_110+ATGCA_153+C_213+CCA_263-ACTAC_322+CGGCCCCCGGCTCATCA	1	41.7	1.08052e-05
207+ACTAAC	1	96.7	1.08052e-05
319-G	1	87	1.08052e-05
203+GAACAC	1	96.7	1.08052e-05
125+GAATAAGAG_167+TGGCCCATCCT_185+GCTTGCTCGTCT_226+TCCG_271+CGGTGGTCGGGTAGCTCAGGAA_322+CGGCCCCCAGCTCATCA	1	41.3	1.08052e-05
207+GAGAGGA	1	95	1.08052e-05
201+GGGAG	1	96.4	1.08052e-05
166-GCTACGATCGATGTCGCAGCGAGGTGAGGAAGAAAGTGAGGAGGA	1	84.3	1.08052e-05
204+GAAGAA	1	96.7	1.08052e-05
34+G_56-A_106-T_134-GA_173+GTGGATTTTGTTTTG	1	45.8	1.08052e-05
208+CTTGCG_280-A	1	87.3	1.08052e-05
56-A_207+AAAGTC	1	95.6	1.08052e-05
21-T_38+CCACCT	1	54.5	1.08052e-05
203+GAAAGC	1	97.6	1.08052e-05

## Sheet: CT2 g12
label	abundance	maxid	freq
202-TGAGGA	33417	98.2	0.673268
203-GAGGAG	8740	98.2	0.176089
203-GAG	3478	99.1	0.0700729
166-GCTACGATCGATGTCGCAGCGAGGTGAGGAAGAAAGTGAGGA	897	86.7	0.0180723
204-AGGAGGA	671	97	0.013519
162-AGATGCTACGATCGATGTCGCAGCGAGGTGAGGAAGAAAGTGAGG	572	86.1	0.0115244
Ref	207	100	0.00417053
202-TGAGGA_323-G	152	97.9	0.00306242
201-GTGAGG	94	98.2	0.00189386
10-A_202-TGAGGA	85	97.9	0.00171254
20-CTG_33+AGGATCGCCCCGCGAAAATGCATGGGGAACAGGGCAAAAATGCCCGCCAT_51+ATTCAG_66+C_110+ATGCA_153+C_213+CCA_263-ACTAC_322+CGGCCCCCGGCTCATCA	73	41.9	0.00147077
34+G_48+G_104-TGT_134-GA_161+TTCGG_174+TTTGTTTTGC	70	47.5	0.00141032
202-TGAGGA_324-T	62	97.9	0.00124914
202-TGAGGA_327-A	58	97.9	0.00116855
202-TGA	54	98.5	0.00108796
203-GAGGAG_323-G	35	97.9	0.000705162
202-TGAGGA_326-G	31	97	0.000624572
202-TGAGGA_325-A	30	96.7	0.000604424
202-TGAGGA_329-G	28	97.9	0.000564129
200-AGTGAG	23	97.3	0.000463392
202-TGAGGA_321-G	22	97	0.000443245
203-GAGGAG_324-T	21	97	0.000423097
202-TGAGGA_322-T	20	96.7	0.00040295
200-AGTGAGG	20	96.7	0.00040295
203-GAG_323-G	19	97.9	0.000382802
203-GAGGAG_327-A	15	96.7	0.000302212
14-G_202-TGAGGA	14	96.7	0.000282065
69-G_202-TGAGGA	14	97.9	0.000282065
10-A_203-GAGGAG	14	97	0.000282065
13-T_202-TGAGGA	12	96.7	0.00024177
46-CTGT_65-ATCTGGGG_123-GTC	10	46.4	0.000201475
204-AGGAGGA_323-G	9	96.1	0.000181327
7-G_202-TGAGGA	9	96.7	0.000181327
43+AT_125+GACA_134+CCTTTGCAC_171-GAT	9	44.6	0.000181327
21+G_124-T_174+GA	8	47.4	0.00016118
202-TGAGGA_244-G	8	97.6	0.00016118
203-GAG_327-A	8	97.9	0.00016118
10-A_203-GAG	8	97.9	0.00016118
208-GGAGGG	8	97.3	0.00016118
124-TCTTGGT_186-G_208-GGAGGGTGGTAGT_266-ACCG_299+GT_315+TT	7	44.9	0.000141032
202-TGAGGA_320-A	7	96.7	0.000141032
203-GAGGAG_325-A	7	96.7	0.000141032
202-TGAGGA_321-GT	6	96.4	0.000120885
203-GAG_322-T	6	97.9	0.000120885
240+GGATT_257-G_314+TCGATACGACT	6	44.5	0.000120885
207+AAAGTC	6	98.2	0.000120885
205-GGAGGAG	6	96.4	0.000120885
9-T_203-GAGGAG	6	97	0.000120885
145-G_202-TGAGGA	6	97.9	0.000120885
203-GAGGAG_322-T	6	97.9	0.000120885
203-GAGGAG_329-G	6	97	0.000120885
47+AGCGA_55-GAT_102+TTTC_175+TCGCCTGTTCG	5	46.4	0.000100737
124-TCTTGGT_186-G_208-GGAGGGTGGTAGT_266-ACCG_299+GT_316+TT	5	45.4	0.000100737
9-T_202-TGAGGA	5	96.7	0.000100737
59-CGAT_123+CGCCATTCTCATCCTGGGCAATA_145-G_187+C_201+TAACCCTGGCCCGATTTCCT_255+GA_284+TCCA_310-GGA	5	43.2	0.000100737
52-G_202-TGAGGA	5	97	0.000100737
34+G_48+G_125+GGCA_134+CCTTTGTAC_174-CGA	5	47.5	0.000100737
197-GAAAGT	5	96.7	0.000100737
202-TGAGGA_271-A	5	96.7	0.000100737
133-T_203-GAGGAG	4	96.7	8.05899e-05
28+TG_54+CGTGTCGTAC_141+T_176+TGCGA	4	47.8	8.05899e-05
180-C_202-TGAGGA	4	96.7	8.05899e-05
14-G_203-GAG	4	97.9	8.05899e-05
77-G_202-TGAGGA	4	96.7	8.05899e-05
7-G_166-GCTACGATCGATGTCGCAGCGAGGTGAGGAAGAAAGTGAGGA	4	85.8	8.05899e-05
203-GAGGAG_320-A	4	96.7	8.05899e-05
166-GCTACGATCGATGTCGCAGCGAGGTGAGGAAGAAAGTGAGGA_326-G	4	85.8	8.05899e-05
34+G_54-GGA_106-T_134-GA_161+TTCGG_174+TTTGTTTTGC	4	47.8	8.05899e-05
202-TGAGGA_288-A	4	96.7	8.05899e-05
203-GAG_324-T	4	97.9	8.05899e-05
34+G_48+G_120+GTGTTGG	4	44.7	8.05899e-05
203-GAGGAG_321-G	4	96.7	8.05899e-05
20-CTG_33+AGGATCGCCCCGCGAAAATGCATGGGGAACAGGGCAAAAATGCCCGCCAT_51+ATTCAG_66+C_110+ATGCA_153+C_213+CCA_263-AC_296+C_320+GCCCCCGGCTCAT	4	42.7	8.05899e-05
73-T_202-TGAGGA	4	96.7	8.05899e-05
207+A	4	98.5	8.05899e-05
189-GTGAGGAAGAAA	4	96.4	8.05899e-05
196-AGAAAG	4	97	8.05899e-05
85-TC_202-TGAGGA	3	97.6	6.04424e-05
162-AGATGCTACGATCGATGTCGCAGCGAGGTGAGGAAGAAAGTGAGG_215-G	3	84.9	6.04424e-05
123-GTCTTGGTGGTGA_248-ACAA_273-TGTTCACA_314+TTTTGT	3	41.9	6.04424e-05
34+G_48+G_104-TGT_130+CACTTGTTGCTCCTT_152+A_171-GAT	3	46.3	6.04424e-05
20-CTG_45+CATCA_104-TGT_134-GA_161+TTCGG_174+TTTGTTTTGC	3	46.4	6.04424e-05
202-TGAGGA_326+G	3	97.9	6.04424e-05
89-C_202-TGAGGA	3	96.7	6.04424e-05
202-TGAGGA_319-GA	3	96.1	6.04424e-05
128-G_202-TGAGGA	3	96.7	6.04424e-05
107-A_202-TGAGGA	3	96.7	6.04424e-05
10-A_166-GCTACGATCGATGTCGCAGCGAGGTGAGGAAGAAAGTGAGGA	3	85.8	6.04424e-05
21-TGCCA_30-GTACTGCGCGGGCTGACTGT_62+AAAAGTAAT_124+GA_157+C_174-CGATGTCG_196-AG_226-ACAGAGA_286+CTC	3	43.3	6.04424e-05
10-A_162-AGATGCTACGATCGATGTCGCAGCGAGGTGAGGAAGAAAGTGAGG	3	84.9	6.04424e-05
69-G_203-GAGGAG	3	96.7	6.04424e-05
94-G_203-GAGGAG	3	96.7	6.04424e-05
20-CTG_45+CGAAAATGCATGGGGAACAGGGCAAA_53+CCATCAGCGC_75+TAGACCTGGAACACGGTGAAT_110+ATGCA_153+C_213+CCA_263-ACTAC_322+CGGCCCCCGGCTCATCA	3	41.9	6.04424e-05
21-TGCCAGCACGTA_73-TGGAGGGATCTGT	3	48.2	6.04424e-05
23-C_202-TGAGGA	3	96.7	6.04424e-05
203-GAGGAG_323-GTA	3	96.1	6.04424e-05
87-T_203-GAGGAG	3	96.4	6.04424e-05
45-ACTGTCCGGGGATGCGATGTAT_193-GG_208-GGAGGGTGGTAGTGCCAC_249+AT_305+A_315+TC	3	43	6.04424e-05
202-TGAGGA_315-A	3	96.7	6.04424e-05
207-A	3	98.8	6.04424e-05
207+AAAGTA	3	97.3	6.04424e-05
203-GAGGAG_271-A	3	97	6.04424e-05
162-AGATGCTACGATCGATGTCGCAGCGAGGTGAGGAAGAAAGTGAGG_323-G	3	84.9	6.04424e-05
9-T_203-GAG	2	97.9	4.0295e-05
162-AGATGCTACGATCGATGTCGCAGCGAGGTGAGGAAGAAAGTGAGG_325-A	2	84.9	4.0295e-05
34+G_48+G_125+GGCACTTGTTGCTC_155-A_171-GAT	2	46.5	4.0295e-05
30-G_54-GGA_68-TGGG_87-TACCACCGGGCA_119-AACTGTC_152-G_230+GT_295-GACGTTAAGCG	2	45.2	4.0295e-05
162-AGATGCTACGATCGATGTCGCAGCGAGGTGAGGAAGAAAGTGAGG_324-TA	2	84.6	4.0295e-05
20+GGCCAGTTAGTAGAC_63+AAC_138+ACAGGCGCGCCA_199+GTTG_264-CTACCGTATTG	2	43.4	4.0295e-05
20+TAAAATC_60+ACCAGAACACACCAAAA_72+CCCATTCA_91-A	2	44.2	4.0295e-05
202-TGAGGA_319-G	2	96.7	4.0295e-05
152-G_202-TGAGGA	2	96.7	4.0295e-05
16-G_203-GAG	2	97.9	4.0295e-05
34+G_48+G_120-ACT_134-GA_161+TTCGG_174+TTTGTTTTGC	2	47.5	4.0295e-05
23-CCAGC_54-GGATGCGA_115-CGT_183-AGCGAGGTGAGGAAGAAAGTGAG_241-TGTG_269-GTATTGTTCACAT_311-GAAGAAGC	2	42.5	4.0295e-05
10-A_202-TGAGGA_327-A	2	96.7	4.0295e-05
60-G_202-TGAGGA	2	96.7	4.0295e-05
203-GAGGAG_222-C	2	96.7	4.0295e-05
67-C_202-TGAGGA	2	96.4	4.0295e-05
35-GCG_65+G_97-CA	2	52.5	4.0295e-05
84-GTC_124+GA_130+AAGCCAA_154+ATCTTCCCGTAAA_179+T_247+GCAAATTTTC	2	42.7	4.0295e-05
34+G_48+G_104-TGT_136-GG_161+TTCGG_174+TTTGTTTTGC	2	47.1	4.0295e-05
24-CAGCA_49+C_60-GATGTA_112-ATACGTTA_145-GG_247-T_259-TGAGA_276-TC	2	48.6	4.0295e-05
49-TCCGGGGAT_125+G	2	50	4.0295e-05
76-A_202-TGAGGA	2	96.7	4.0295e-05
203-GAGGAG_322+T	2	96.7	4.0295e-05
34+G_48+G_125+GACA_134+CCTTTGAAC_174-CGA	2	46	4.0295e-05
166-GCTACGATCGATGTCGCAGCGAGGTGAGGAAGAAAGTGAGGA_324-T	2	85.8	4.0295e-05
166-GCTACGATCGATGTCGCAGCGAGGTGAGGAAGAAAGTGAGGA_323-G	2	85.8	4.0295e-05
166-GCTACGATCGATGTCGCAGCGAGGTGAGGAAGAAAGTGAGGA_271-A	2	86.1	4.0295e-05
34+G_48+G_125+GACA_134+CCTTTGCAC_174-CGA	2	46	4.0295e-05
166-GCTACGATCGATGTCGCAGCGAGGTGAGGAAGAAAGTGAGGA_322-T	2	85.8	4.0295e-05
25-A_45+AGCAA_127-TG_140-GAGTCGG	2	50	4.0295e-05
202-TGAGGA_323-GTA	2	96.1	4.0295e-05
13-T_203-GAG	2	97.9	4.0295e-05
119-A_202-TGAGGA	2	96.7	4.0295e-05
106-T_202-TGAGGA	2	96.7	4.0295e-05
13-TGCGC_129+GCCAATTAGGTGCGAGAGCACGC_210+TT	2	42.1	4.0295e-05
208+G	2	99.7	4.0295e-05
203-GAG_321-G	2	97.9	4.0295e-05
196-AGAAAGTGAGG	2	96.4	4.0295e-05
203-GAGGAGG	2	95.5	4.0295e-05
203-GAGGAG_326-G	2	96.4	4.0295e-05
208+AGAAAG	2	92.9	4.0295e-05
202-TGAGGA_298-G	2	95.8	4.0295e-05
197-GAAAGTGAG	2	95.5	4.0295e-05
13-T_203-GAGGAG	2	97.3	4.0295e-05
204-AGGA	2	97.6	4.0295e-05
202-TGAGGA_264-C	2	90.7	4.0295e-05
14-G_203-GAGGAG	2	97	4.0295e-05
211-GGG	2	97.3	4.0295e-05
131-G_203-GAGGAG	2	96.4	4.0295e-05
15-C_203-GAG	2	97.9	4.0295e-05
202-TGAGGA_249-C	2	96.7	4.0295e-05
203-GAG_325-A	2	97.9	4.0295e-05
202-TGAGGA_285+A	2	91	4.0295e-05
201-GTGAG	2	98.2	4.0295e-05
204-AGGAGGA_324-T	2	96.1	4.0295e-05
45-ACTGTCCGGGGATGCGATGTAT_193-GG_226+TG_283-GG	2	41.9	4.0295e-05
77-G_203-GAGGAG	2	95.8	4.0295e-05
94-G_202-TGAGGA	2	97.3	4.0295e-05
191-GAGGAAGAAAGTGAG_327-A	1	94	2.01475e-05
152-G_203-GAG	1	97.9	2.01475e-05
26+CGAAGGGATCGCCCCGCGAAAAT_53+ACATAAGCGC_77-GG_104+GTGGC_125+TTCATGCATCACTCGTGGAC_177+ATAACAGCTAAGCGCCGAC_248+C_305-G	1	42.9	2.01475e-05
20-CTG_33+AGGATCGCCCCGCGAAAATGCATGGGGAACAGGGCAAAAATGCCCGCCAT_51+ATTCAG_66+C_110+ATGCA_153+C_202+CCA_263-AC_292+CCAGCCAAACCAG	1	42.1	2.01475e-05
20-CTG_33+AGGATCGCCCCGCGAAAATGCATGGGGAACAGGGCAAAAATGCCCGCCAT_51+ATTCAG_66+C_110+ATGCA_155+GCTCTACGTCCGGCACTAAATA_211-GGGTGG	1	45.2	2.01475e-05
63-G_202-TGAGGA	1	91.9	2.01475e-05
20-CTG_33+AGGATCGCCCCGCGAAAATGCATGGGGAACAGGGCAAAAATGCCCGCCAT_51+ATTCAG_66+C_110+ATGCA_153+C_213+CCA_263-ACTAC	1	41.7	2.01475e-05
162-AGATGCTACGATCGATGTCGCAGCGAGGTGAGGAAGAAAGTGAGG_324-T	1	84.9	2.01475e-05
205-GG	1	99.1	2.01475e-05
90-CACCGG_139+AAG	1	53.2	2.01475e-05
203-GAGGAG_294-C	1	93.1	2.01475e-05
197-GAAAGTGAGG	1	96.1	2.01475e-05
292-G_307+C_318-C	1	91.6	2.01475e-05
20-CT_70-GGGTGGAGGGATCTGTCTACCA_106-TAACGGATAC_121+TC_140-G	1	48.7	2.01475e-05
202-TGAGGA_308-C	1	94	2.01475e-05
203-GAGGA	1	98.5	2.01475e-05
126-T_202-TGAGGA	1	96.7	2.01475e-05
325-A	1	92.2	2.01475e-05
202-TGAGGA_298-G_312+A	1	88	2.01475e-05
202-TGAGGA_267+CC_316-AG	1	90.7	2.01475e-05
202-TGAGGA_293+C	1	89.5	2.01475e-05
209-GAGGGT	1	94	2.01475e-05
52-G_162-AGATGCTACGATCGATGTCGCAGCGAGGTGAGGAAGAAAGTGAGG	1	72.9	2.01475e-05
234-C_295+G	1	87.7	2.01475e-05
193-GGAAGAAAGTGAG	1	95.8	2.01475e-05
124-TCTTGGT_181-G_200-AGTGAGGAG_266-ACCG_282+GTA_300+A	1	48.5	2.01475e-05
201-GTGAGG_255+AACCACACAGAAAGGTTAGGAAAGGAATAAAAAGA	1	80.9	2.01475e-05
202-TGAGGA_261+A	1	87.1	2.01475e-05
202-TGAGGA_238-G	1	96.7	2.01475e-05
204-AGGAGGA_325-A	1	96.1	2.01475e-05
215+TCATG_296+T_322+GATTTTGATTTGCTCT	1	42.6	2.01475e-05
69-G_162-AGATGCTACGATCGATGTCGCAGCGAGGTGAGGAAGAAAGTGAGG	1	84.9	2.01475e-05
20+GGAATCAGCCT_33+AGC_91-ACCGGGCAAGAAGTGTAACG_143+GATT	1	47.4	2.01475e-05
191-GAGGAAGAAAGTGAG	1	85.2	2.01475e-05
202-TGA_232-AGC	1	92.5	2.01475e-05
208+AAGTAG	1	97.3	2.01475e-05
202-TGAGGA_262+G_306-T	1	90.4	2.01475e-05
202-TGAGGA_263-A	1	84	2.01475e-05
19+ACCAGGACGAAAGGATCGCCTCGCGAAAATGCATGGGGAATAGGGCAAAAATG_71+T_110+ATGCA_155+CCTCTAC_220-TGC_248-ACAAC_310+AAACA_320+CCCCCGGCTCAT	1	40.7	2.01475e-05
202-TGAGGA_273-TGTTCACATCGG	1	82.2	2.01475e-05
99+TTCAGCGTGT_143+AGCAGTGTTTCATGCCTCACCCGTGGTCCATCCTTTTGGATC_158+CGGGGGACTACGTCCGGCAGC_170+AG	1	44	2.01475e-05
51-CGGGGAT_85-TCTACCA	1	50.9	2.01475e-05
207-A_292-G	1	90.4	2.01475e-05
50-CCGGGG_76+CC_98+TTG_127+C_205+TATT_223+TCGGAGCCTGAT_258+CCTTCGAT_269-G_298-GTTAA	1	46.9	2.01475e-05
202-TGAGGA_283-G	1	96.7	2.01475e-05
16+TCATATTGACAATT_90+T_114+GA	1	47.5	2.01475e-05
86-CTACCACCGGGCAAGAAGTGTAACGGATACGTTAACTGTCTTGGTGGTGAGGATGAGTCGGGCTGTGGGATGGATCAGATGCTACGATCGATGTCGCAGCGAGGTGAGGAAGAAAGTGAGGA	1	62.7	2.01475e-05
203-GAGGAG_269-G	1	95.5	2.01475e-05
185-CGAGGTGAGGAAGAAAGTGAGGA	1	84	2.01475e-05
310-G	1	87.7	2.01475e-05
200-AGT	1	97.6	2.01475e-05
21+CAGGACGAAAGAATCGACCCGCGAAAATGCATGGGGAACAGGGCAAAAA_38+GA_58+AGA_110+ATGCA_153+C_213+CCA_260-GAGAC_322+CTGCCCCAGGCTCATCA	1	40.5	2.01475e-05
73-T_202-TGAGGA_327-A	1	90.7	2.01475e-05
20-CTG_33+AGGATCGCCCCGCGAAAATGCATGGGGAACAGGGCAAAAATGCCCGCCAT_51+ATTCAG_66+C_110+ATGCA_153+C_213+CCA_263-ACTAC_322+CGGCCACCGGCTCATCA	1	41.7	2.01475e-05
198-AAAGTGAGGA	1	95.5	2.01475e-05
202-TGAGGA_282-C	1	88.3	2.01475e-05
152-GGGATGGATCAGATGCTACGATCGATGTCGCAGCGAGGTGAGGAAGAAAGTGAGGA	1	81.9	2.01475e-05
20-CTG_76-AGGGATC_119+GC_166-GC	1	44.1	2.01475e-05
20-CTG_33+AGGATCGCCCCGCGAAAATGCATGGGGAACAGGGCAAAAATGCCCGCCAT_51+ATTCAG_84+C_110-GG_125+GGCC_175-G_204+CCGCCAAA_244+CGGTGGTC_279+GACC	1	42.6	2.01475e-05
20-CTG_33+AGAATCGCCCCGCGAAAATGCATGGGGAACAGGGCAAAAATGCCCGCCAT_51+ATTCAG_66+C_110-GG_125+GGCCGATCCTTTTGAATCGCAGGCGGCGG_211-GGGTGG	1	49.3	2.01475e-05
162-AGATGCTACGATCGATGTCGCAGCGAGGTGAGGAAGAAAGTGAGG_271-A	1	85.2	2.01475e-05
126-TTG_202-TGAGGA	1	96.1	2.01475e-05
37+GG_79+CTC	1	54	2.01475e-05
20-CTG_40+CCCCGCGAAAATGCAT_80-AT_97-C_143-T_167+TGGCCCGTCCTTTTGAATCGC_185+CT_227+CCGC_252+AACATCAGGTCGCTCATGTCGG_322+CGGCCCCCGGCTCAGCA	1	42.3	2.01475e-05
202-TGAGGA_279-C	1	92.8	2.01475e-05
203-GAG_244-G	1	88.6	2.01475e-05
208+AGGTCG	1	97	2.01475e-05
20-CTG_33+AGAATCGCCCCGCGAAAATGCATGGGGAACAGGGCAAAAATGCCCGCCAT_51+ATTCAG_66+C_110+ATGCA_153+C_202+CCA_263-ACTAC_322+CGGCCCCAGGCTCATCA	1	41.9	2.01475e-05
203+GAA	1	96.1	2.01475e-05
29+TAGC_81-TCTGTCT_125-CTTGGTGGTGAGGATGA_153-GGAT_224-ACACA_245+ATA_270+GCGGAACGGCACAC_311-GAAGAA	1	43.1	2.01475e-05
187-A_207+AAAGTC	1	89.9	2.01475e-05
145+A_191-GAGGAAGAAAGTGAG	1	92.2	2.01475e-05
20-CTG_33+AGGATCGCCCCGCGAAAATGCATGGGGAACAGGGCAAAAATGCCCGCCAT_51+ATTCAG_66+C_110+ATGCA_153+C_204+AAA_263-ACTAC_322+CGGCCCCCGGCTCATCA	1	42.2	2.01475e-05
292+G_325-A	1	90.4	2.01475e-05
202-TGAGGA_295-G	1	84	2.01475e-05
35-GCG_202-TGAGGA	1	82.8	2.01475e-05
205-G	1	98.5	2.01475e-05
202-TGAGGA_258-C_314+G	1	90.1	2.01475e-05
203-GAG_326-G	1	97.6	2.01475e-05
202-TGAGGA_248+AAAAAG	1	89.9	2.01475e-05
21-T_39-G	1	61.1	2.01475e-05
207+AAAGAA	1	96.4	2.01475e-05
21-TGCCAGCACGTA_64-TATCTGGGGTGGA	1	47.3	2.01475e-05
131-G_203-GAG	1	97.3	2.01475e-05
20+C_56+AACAGGGCAAAA_70+C_81-TCT_97-C_143-T_167+TGGCCCGTCCT_185+GCTTGCGCGGCT_230+CCCA_252+AACATCAGGTCGCTCATGTCGG_322+CGGCCCCCGGCTCATCA	1	43	2.01475e-05
208+AAGTCG	1	96.4	2.01475e-05
20-CTG_40+CCCCGCGAAAATGCAT_75+CCACGGAGTCATTCAGCGTGTAGACCTGGAACACGGTGAAT_110+ATGCA_153+C_213+CCA_263-ACTAC_322+CGGCCCCCGGCTCATCA	1	41.2	2.01475e-05
74-G_202-TGAGGA	1	95.8	2.01475e-05
20-CTG_33+AGGATCGCCCCGCGAAAATGCATGGGGAACAGGGCAAAAATGCCCGCCAT_51+ATTCAG_66+C_110+ATGCA_153+C_202+CCA_248-ACAAC_322+CTGCCCCCGGCTCATCA	1	41.2	2.01475e-05
94-G_201-GTGAGG	1	90.7	2.01475e-05
20-CTG_33+AGGATCGCCCCGCGAAAATGCATGGGGAACAGGGCAAAAATGCCCGCCAT_51+ATTCAG_66+C_110+ATGCA_153+C_213+CCA_263-ACTAC_322+CGGCCCACGGCTCATCA	1	41.7	2.01475e-05
107-AACGGATACGTTAACTGTCTTGGTGGTGAGGATGAGTCGGGCTGTGGGATGGATCAGATGCTACGATCGATGTCGCAGCGAGGTGAGGAAGAAAGTGAGGA	1	69.6	2.01475e-05
47+AGCGA_55-GAT_102+TTTC_175-GATGTCG	1	46.8	2.01475e-05
20+TGCAGGTGTAC_61-A_79-GATCTGTCTA_131-GGTGAGGATGAGTCGGGCTGTGGGATGG_186-G_211-GGGT_224-ACA_241+ATTT_272+G_287+CTGT	1	46	2.01475e-05
229+CTCAC_243+AA_303+CGCC	1	49.7	2.01475e-05
203-GAG_253-G	1	91.9	2.01475e-05
202-TGAGGA_299-T	1	95.8	2.01475e-05
198-AAAGTGA	1	95.5	2.01475e-05
202-TGAGGA_258-C	1	91	2.01475e-05
205+ACACTG	1	96.7	2.01475e-05
67-CTGGGGTGGAGGGATCTGTCTACCACCGGGCAAGAAGTGTAACGGATACGTTAACTGTCTTGGTGGTGAGGATGAGTCGGGCTGTGGGATGGATCAGATGCTACGATCGATGTCGCAGCGAGGTGAGGAAGAAAGTGAGGA	1	56.3	2.01475e-05
21+AAGAGG	1	54.3	2.01475e-05
13-TGCGC_130+CCAATTAGGT_144+TACAAGTGAGTGTAG_166-GC_210+TT	1	44.2	2.01475e-05
203-GAGGAG_285+A_324-T	1	91.3	2.01475e-05
48+A_65-A	1	79.3	2.01475e-05
218-AGTGCC	1	94	2.01475e-05
166-GCTACGATCGATGTCGCAGCGAGGTGAGGAAGAAAGTGAGGA_327-A	1	85.5	2.01475e-05
202-TGAGGA_291+g	1	88	2.01475e-05
202-TGAGGA_244-G_275+T_305-G	1	87.4	2.01475e-05
41-GCT_57-T_65-ATCTGGGG_105-GTAA_127+A_177+CTGCGAC	1	50.8	2.01475e-05
203-GAG_269-G	1	97.9	2.01475e-05
20-CT_34+G_48+G_85+C_110-GGATACGTTAA_131-G_166-GCTACG_201-G	1	50.7	2.01475e-05
20+CCAGGACAAAAGGATCGCCCCGCGAAAATGCATGGGAACAGGGCAAAAATGC_66+C_110+ATGCA_153+C_213+CCA_263-ACTAC_322+CGGCCCCCGGCTCATCA	1	40.4	2.01475e-05
20-CTG_33+AGGATCGCCCCGCGAAAATGCATGGGGAACAGGGCAAAAATGCCCGCCAT_51+ATTCAG_66+C_110+ATGCA_153+C_213+CCA_263-AC_296+C_320+GCCCCAGGCTCAT	1	42.7	2.01475e-05
25+AG_40+TACGGA_68-T_94-GG_105+C_132-GT	1	55.1	2.01475e-05
165-TGCTACGATCGATGTCGCAGCGAGGTGAGGAAGAAAGTGAGG	1	85.8	2.01475e-05
20-CTG_33+AGGATCGCCCCGCGAAAATGCATGGGGAACAGGGCAAAAATGCCCGCCAT_51+ATTCAG_66+C_110+ATGCA_153+C_202+CCA_263-ACTAC_322+CGGCCCCCGGCTCATCA	1	41.7	2.01475e-05
17+C_40+TCATTC_67+AAGAGAGTCGCCG_155+CAAATA_211-GGGTGG	1	47.2	2.01475e-05
205+G	1	98.8	2.01475e-05
208-GGAGGG_325-AG	1	67.2	2.01475e-05
77-G_202-TGAGGA_323-G	1	96.4	2.01475e-05
22-GCCAGCACGTAC_73-TGGAGGGATCTGT	1	48.2	2.01475e-05
203-GAGGAG_299-T	1	96.7	2.01475e-05
20-CTG_33+AGGATCGCCCCGCGAAAATGCATGGGGAACAGGGCAAAAATGCCCGCCAT_51+ATTCAG_66+C_110+ATGCA_153+C_213+CCA_263-ACTAC_310+AAACA_320+CCCCCGGCTCAT	1	42.2	2.01475e-05
76-A_166-GCTACGATCGATGTCGCAGCGAGGTGAGGAAGAAAGTGAGGA	1	85.8	2.01475e-05
20-CTG_33+AGGATCGCCCCGCGAAAATGCATGGGGAACAGGGCAAAAATGGCCGCCAT_51+ATTCAG_66+C_110+ATGCA_151+CGCGGCACTACGTC_170+AG	1	40.2	2.01475e-05
202-TGAGGA_285-A	1	96.7	2.01475e-05
162-AGATGCTACGATCGATGTCGCAGCGAGGTGAGGAAGAAAGTGAGG_285-A	1	84.9	2.01475e-05
34+G_48+G_120+GTGTTGG_150+TC	1	45.5	2.01475e-05
20-CTG_40+CCCCGCGAAAATGCAT_80-AT_97-C_143-T_167+TGGCCCGTCCT_185+GCTTGCGCGGCT_227+CCGC_252+AACATCAGGTCGCTCATGGCGG_322+CGGCCCCCGGCTCATCA	1	42.5	2.01475e-05
20-CTG_33+AGGATCGCCCCGCGAAAATGCATGGGGAACAGGGCAAAAATGCCCGCCAT_51+ATTCAG_66+C_110+ATGCA_153+C_213+CAA_263-ACTAC_321+CCGGCCCCCGGCTCATC	1	41.4	2.01475e-05
77-G_197-GAAAGT	1	93.7	2.01475e-05
106-T_130+CACTTGTTGCTCCTT_156+G_171-GAT	1	46.3	2.01475e-05
265+T	1	87.3	2.01475e-05
202-TGAGGA_251+TCGG	1	91.1	2.01475e-05
202-TGAGGA_257-GCTGAG	1	91.3	2.01475e-05
19-ACTGCCA_53-GGGATGCGATGTATCTGGGGTGGAGGGA_175+AGGG	1	42.9	2.01475e-05
220+GC_296+T_322+GATTTTGTTTTGCTGT	1	43.2	2.01475e-05
203-GAGGAG_325+A	1	87.1	2.01475e-05
20+C_56+AACAGGGCAAAA_80-AT_97-C_143-T_167+TGGCCCATCCT_239+CCGC_260+A_288+TCGGGTAGCTAAAGAAATTAGCCATCACGCTTA_309+CAAA_320+GCCCCAGGCTCAT	1	43.8	2.01475e-05
195-AAGAAAGTGAGGA	1	94.9	2.01475e-05
160-TCAGATGCTACGATCGATGTCGCAGCGAGGTGAGGAAGAAAGTG_211-G	1	74.4	2.01475e-05
207-AGGAGGGTGGTAGTGCCACACAGAGAGCTTCGGATGTGGATACAACGGAAGCTGAGACTACCGTATTGTTCACATCGGAAGAAACGACGACGTTA	1	70.5	2.01475e-05
203-GAG_244+GGATGCGAC	1	91.5	2.01475e-05
17-C_203-GAGGAG	1	96.4	2.01475e-05
271-A	1	91	2.01475e-05
203-GAG_312-A	1	94.6	2.01475e-05
186-GAGGTGAGGAAG	1	84.9	2.01475e-05
203-GAG_249-CAACGGAAGCTG	1	86.7	2.01475e-05
45-ACTGTCCGGGGATGCGATGTAT_193-GG_208-GGAGGGTGGTAGTGCCAC_254-GAAGC_307-G	1	41.9	2.01475e-05
203-GAGGAG_267-CC_280+A_312+a	1	88.3	2.01475e-05
162-AGATGCTACGATCGATGTCGCAGCGAGGTGAGGAAGAAAGTGAGG_321-G	1	84.9	2.01475e-05
35+CGCCCCGCGAAAATGCATGGGGAACAGGGCAAAAATGC_63+CAGCGTGTAGACCTGG_110+ATGCA_155+GGTCTACGTCCGGCAGCAAATA_197-GAAAGT	1	40	2.01475e-05
200-AGTG_322-T	1	88.3	2.01475e-05
12-AT_64+aa_202-TGAGGA	1	83.5	2.01475e-05
21+CAGGACGAAAGGA_70+C_91+GTGTAG_115+GTCGC_135+TTTCATGC_172-A_233+AAAG_252+AACATCAGGTCGCTCATGTCGG_322+CGGCCCCCGGCTCATCA	1	42.9	2.01475e-05
203-GAGG	1	97.6	2.01475e-05
206-GA	1	98.8	2.01475e-05
199-AAGTGAGG	1	96.7	2.01475e-05
202-TGAGGA_253+GGAAGAAAAAAA	1	88.7	2.01475e-05
202-TGAGGA_263-A_298+A_322-T	1	92.5	2.01475e-05
56-A_202-TGAGGA	1	95.5	2.01475e-05
191-GAGGAAGAAAGTGAGGA	1	94.3	2.01475e-05
20-CTG_33+AGGATCGCCCCGCGAAAATGCATGGGGAACAGGGCAAAAATGCCCGCCAT_51+ATTCAG_66+C_110+ATGCA_153+A_213+CCA_263-ACTAC_322+CAGCCCCCGGCTCATCA	1	41.7	2.01475e-05
157-G_203-GAGGAG	1	97	2.01475e-05
67+AAATGCCCGCCATC_81-TCT_97-C_143-T_163+CCCGTGGCCCG_185+GCTTGCGCGGCT_233+AAAG_252+AACATCAGGTCGCTCATGTCGG_322+CGGCCCGAGGATCATCA	1	42.7	2.01475e-05
20-CTG_33+AGAATCGCCCCGCGAAAATGCATGGGGAACAGGGCAAAAATGCCCGCCAT_51+ATTCAG_66+C_110+ATGCA_153+C_213+CCA_263-ACTAC_322+CGGCCCCAGGCTCATCA	1	41.7	2.01475e-05
202-TGAGGA_258+C_322-T	1	91	2.01475e-05
134-GAGGATGAGTCGGGCTGTGGGATGGATCAGATGCTACGATCGATGTCGCAGCGAGGTGAGGAAGAAAGTGAG	1	78.3	2.01475e-05
152-G_203-GAGGAG	1	96.7	2.01475e-05
203-GAGGAG_279-C	1	89.2	2.01475e-05
202-TGAGGA_265-T	1	88.9	2.01475e-05
202-TGAGGA_223-CA	1	96.4	2.01475e-05
165-TGCTACGATCGATGTCGCAGCGAGGTGAGGAAGAAAGTGAGGAGG	1	85.2	2.01475e-05
202-TGAGGA_253+GAA	1	85.1	2.01475e-05
51+ACGTTTAATCACCA	1	48.9	2.01475e-05
203-GAG_321-GT	1	97.6	2.01475e-05
240-ATGT_248-ACAACG_273+AAAGGTTGTCTTA_287+CAGGAAGAAAGC	1	43.2	2.01475e-05
208+AGATAG	1	97.3	2.01475e-05
20+G_48+G_125+GGCACTTGTTGCTC	1	42.4	2.01475e-05
202-TGAGGA_222-C	1	96.4	2.01475e-05
189-GTGAGGAAGAAAGTGA	1	82.5	2.01475e-05
89-C_203-GAGGAG	1	96.7	2.01475e-05
10-A_323-G	1	96.4	2.01475e-05
45-ACTGTCCGGGGATGCGATGTAT_193-GG_224+GCTG_268-CG	1	41.7	2.01475e-05
207+AAAGTC_237+C_323-G	1	87.6	2.01475e-05
10-A_200-AGTGAG	1	80.7	2.01475e-05
202-TGAGGA_253-G	1	96.7	2.01475e-05
202-TGAGGA_293-A	1	88.3	2.01475e-05
19+AGCCGGAGTGTTGTCGAGAGCAGCATCAATGGT_63+CCGCGAAGAGATTGCAC_86-C_108+TTTCG_121+TT_150+CTTATA	1	41.9	2.01475e-05
19+AGCAGAAGATCTCGGGCCGGAACA_38+GA_64+CGGTCT_125+CGGG_147+TCCT	1	47.6	2.01475e-05
20-CTG_40+CCCCGCGAAAATGCAT_80-AT_97-C_143-T_167+TGGCCCGTCCT_185+GCTTGCGCGGCT_226+GCCG_252+AACATCAGGTCGCTCATGTCGG_322+CTGCCCCCGGCTCATCA	1	42	2.01475e-05
20-CTG_33+AGGATCGCCCCGCGAAAATGCATGGGGAACAGGGCAAAAATGCCCGCCAT_51+ATTCAG_66+C_110+ATGCA_153+C_213+CCA_263-ACTAC_322+CGGCCCCCGGCTCAGCA	1	41.9	2.01475e-05
23+T_38-CGGGCTGACT_98+GCCAG_171+A_181+AT_204+CACTTTAGTTTTACTTCCACGTGC	1	44.4	2.01475e-05
46-CTGT_65-ATCTGGGG_111-GA_157+CCTCGACAGCGA_171-GATCGA	1	46.7	2.01475e-05
38-CGGGCTGACTGTCCGGGGATGCGATGTATCT	1	45	2.01475e-05
19+T_40+ATGGCAA_85-TCTACCAC	1	71.8	2.01475e-05
50-CCGGGG_76+CC_98+TTG_127+C_205+TATTGCG_322-T	1	44.9	2.01475e-05
211-GGGTGG_252+AACAAG	1	84.3	2.01475e-05
85-TC_128-GGTG_177-TG_220-T_257+GGTACTGTGT_287+AGCAT_304+ACATT	1	45.9	2.01475e-05
20-CTG_33+AGGATCGCCCCGCGAAAATGCATGGGGAACAGGGCAAAAATGCCCGCCAT_51+ATTCAG_66+C_110+ATGCA_155+GCTC_263-AC_296+C_320+GCCCCAAGCTCAT	1	42	2.01475e-05
205-GGAGG	1	95.5	2.01475e-05
20-CTG_40+CCCCGCGAAAATGCAT_80-AT_97-C_143-T_187+CAGGCGGGGGGTTGCGCGGGTCT_226+GCCG_252+AACATCAGGTCGCTCATGTCGG_309+CAAA_320+GCCCCCAGCTCAT	1	42	2.01475e-05
7-GG_202-TGAGGA	1	96.4	2.01475e-05
50-CCGGGG_76+CC_98+TTG_127+C_217+A_232-AGC_261+TCCAGTGCGCGCC_273+GTGCCCAAAAGG_298-GTTAA	1	47.4	2.01475e-05
34+G_48+G_174+TTTGTTTTGC	1	43.7	2.01475e-05
25-AGCACGTACTGCGCGGGCTG_60-GATGTATCTGG	1	47.9	2.01475e-05
324-T	1	94	2.01475e-05
100-G_202-TGAGGA	1	96.7	2.01475e-05
122-TGTCTTGGTGGTGAGGATGAGTCGGGCTGTGGGATGGATCAGATGCTACGATCGATGTCGCAGCGAGGTGAGGAAGAAAGTGAGGA	1	73.5	2.01475e-05
202-TGAGGA_274-G_298+T	1	87.7	2.01475e-05
202-TGAGGA_255-A	1	84	2.01475e-05
85-TC_128-GGTG_175+A_257+CTGTGT_287+AGCAT_304+ACATT	1	44.9	2.01475e-05
202-TGAGGA_258-C_291+C	1	90.4	2.01475e-05
130-T_202-TGAGGA	1	96.4	2.01475e-05
207+GTA	1	97	2.01475e-05
20+TAAAATC_60+ACCAGAACACACCAAAA_73+CCATTCAT_91-A	1	44.7	2.01475e-05
196-AGAAAGT	1	95.8	2.01475e-05
201-GTG	1	98.2	2.01475e-05
10-A_107-A_202-TGAGGA	1	96.4	2.01475e-05
202-TGAGGA_241-TG	1	96.4	2.01475e-05
202-TGAGGA_265-T_313-AG	1	88	2.01475e-05
26+C_56+AACAGGGCAAAA_80-AT_97-C_139-T_167+TGGCCCGTCCT_185+GCTTGCGCGGCT_227+CCGC_252+AACATCAGGTCGCTCATGTCGG_322+CGGCCCCCGGCTCATCA	1	42.8	2.01475e-05
215-G_269+G	1	89.2	2.01475e-05
20+TGCAGGTGTAC_61-A_79-GATCTGTCTA_129-GTGGTGAGGATGAGTCGGGCTGTGGGAT_186-G_211-GGGT_224-ACA_241+ATTT_272+G_287+CTGT	1	45.7	2.01475e-05
21-T_82+G_114+CGC_184-GCGAGG_201-GTGAGGAGGAGGGTGGTAGTGCC_230-AGAGCTT_287-GAAACG_319+AT	1	47.3	2.01475e-05
202-TGAGGA_312-A	1	89.5	2.01475e-05
202-TGAGGA_255+A	1	87.1	2.01475e-05

## Sheet: >1% only
	CT1			CT2
	g2	g12		g2	g12
Ref	0.625144	0.0613519		0.481516	0.00417053
208+AGAAAG	0.000618108	0.0150084		0.00038706	0
207-A	0.0126292	0.00132904		0.0113198	0
207+AAAGTC	0.000282346	0.100143		0.000251249	0.000120885
207+A	0.0312717	0.000680728		0.0424679	0
206-GA	0.00928689	0.00947616		0.011863	0
205+GGGTGAG	0	0.0104919		0	0
205+CCACTT	0	0.0224208		0	0
204-AGGAGGA	0.000366286	0.000453819		0.000285202	0.013519
204-AGGA	0.00955397	0.000172883		0.0104167	0
203-GAGGAG	0.0306536	0.550622		0.0194413	0.176089
203-GAG	0.0309436	0.031119		0.0239366	0.0700729
203+GGA	7.63097e-05	0.014587		0	0
202-TGAGGA	0.0144683	0.0734214		0.122861	0.673268
200-AGTGAGG	0.0191537	0.000367377		0.0222526	0.00040295
199-AAGTGAGG	0.0143538	0.000334961		0.016793	0
198-AAAGTGAGGA	0.0117441	0.000226909		0.0134656	0
197-GAAAGTGAG	0.0180778	0.000561871		0.0235767	0
196-AGAAAGTGAGG	0.00905796	0.000302546		0.0159985	0
191-GAGGAAGAAAGTGAG	0.00136594	0.0256948		0.00391134	0
166-GCTACGA….GAGGA(42bp)	0.000877561	0.000864416		0.000563614	0.0180723
162-AGATG….TGAGG(45bp)	0.000305239	0.00027013		0.000115439	0.0115244
others (<1%)	0.15977	0.080099		0.178577	0.0327598
